# Supplementary material
Source: PubMed Central journal article supplement (PMC3151341)

## Supplemental Figures and Tables Legends

**Suppl. Table 1. Average densitometry values for all substrates on the arrays for LT-HSC and their Markov test of significance.**

| Peptide # | Sequence       | Source protein                                          | $\sum(x_1, x_2, \dots, x_9)/n$ | $\sigma(x_1, x_2, \dots, x_9)$ | Markov state |
|-----------|----------------|---------------------------------------------------------|--------------------------------|--------------------------------|--------------|
| 1         | HEYIYDPM       | platelet-derived growth factor receptor                 | 0,923932801                    | 0,327426171                    |              |
| 2         | KRPSVRAKA      | Myelin basic protein                                    | 2,018744305                    | 0,488781314                    | On           |
| 3         | EDNEYTARQ      | Tyrosine-protein kinase transforming protein SRC        | 1,041849924                    | 0,311972368                    |              |
| 4         | ENKLYGMSD      | Probable receptor with tyrosine-protein kinase activity | 0,488694283                    | 0,091057372                    |              |
| 5         | HRLLTLDPV      | Interleukin-1 receptor                                  | 0,59490932                     | 0,101538646                    |              |
| 6         | LEKKYVRRD      | macrophage colony stimulating factor 1 receptor         | 0,394328427                    | 0,071033877                    |              |
| 7         | PYKFPSSPLRIPGZ |                                                         | 0,526011935                    | 0,167540815                    |              |
| 8         | GKRQTEREK      | Troponin T                                              | 0,892507694                    | 0,156248598                    |              |
| 9         | APATSPKAE      | neuromodulin (GAP43)                                    | 0,518207662                    | 0,126467017                    |              |
| 10        | DEESEQGA       | tubulin                                                 | 0,830003538                    | 0,159302349                    |              |
| 11        | FFRRSKIIV      | glutamate receptor 2                                    | 0,962662611                    | 0,138578438                    |              |
| 12        | GMTEYVATR      | Mitogen-activated protein kinase FUS3                   | 0,657867965                    | 0,092479797                    |              |
| 13        | EAALYKNLL      | Mast/stem cell growth factor receptor                   | 0,431658288                    | 0,040631147                    |              |
| 14        | ELILSPRSK      | stathmin                                                | 0,636788048                    | 0,091061642                    |              |
| 15        | RRAVSEQDA      | Tyrosine 3-monooxygenase                                | 0,661513842                    | 0,021836168                    |              |
| 16        | SEDNSEDEI      | acetyl-CoA carboxylase                                  | 1,112059997                    | 0,456258643                    |              |
| 17        | PASLSRAKA      | phosphorylcholine transferase                           | 1,176365739                    | 0,037173559                    | On           |
| 18        | RRASL          | pyruvate kinase                                         | 1,736212288                    | 0,31174118                     | On           |
| 19        | AKKMSTYNV      | myosin heavy chain                                      | 1,551045035                    | 0,507519996                    |              |
| 20        | DDINSYEAW      | Coagulation factor IX                                   | 1,141806193                    | 0,606450452                    |              |
| 21        | ETRFTDTRK      | elongation factor 2                                     | 0,764574359                    | 0,086502801                    |              |
| 22        | QLSTSEENS      | Alpha-S2 casein                                         | 0,56568762                     | 0,078205151                    |              |
| 23        | SPRKSPKKS      | Histone H1                                              | 1,739879147                    | 0,208417729                    | On           |
| 24        | RRKASGP        | Histone H1.1                                            | 1,487755133                    | 0,092382953                    | On           |
| 25        | RQLRSPRRT      | ras-related protein Rab-4A                              | 2,253725906                    | 0,346183854                    | On           |
| 26        | SAVASNMRD      | muscarinic acetylcholine receptor M2                    | 0,545354609                    | 0,115381281                    |              |
| 27        | RTPPPSG        | Myelin basic protein                                    | 0,682579875                    | 0,085140306                    |              |
| 28        | LRRAS          | Red cell/liver pyruvate kinase                          | 1,139154748                    | 0,184326552                    | On           |
| 29        | SSTGSIDMV      | Microtubule-associated protein tau                      | 0,723855622                    | 0,099999669                    |              |
| 30        | TLASSFKRR      | glutamate (NMDA) receptor subunit zeta 1                | 2,153004027                    | 0,567765598                    | On           |
| 31        | VGAFSTVKG      | rhodopsin kinase                                        | 0,984294639                    | 0,061704764                    | On           |
| 32        | YSGHMSMDP      | pyruvate dehydrogenase E1                               | 0,638480037                    | 0,098901619                    |              |
| 33        | SPGEYVNIE      | Insulin receptor substrate 1                            | 0,751656105                    | 0,243105331                    |              |
| 34        | RKRSAKE        | Histone H2B                                             | 1,198567593                    | 0,115604569                    | On           |
| 35        | VINETSQHH      | vimentin                                                | 0,508028701                    | 0,175079185                    |              |
| 36        | SPVVSQDTS      | Microtubule-associated protein tau                      | 0,598994876                    | 0,167920649                    |              |
| 37        | LRRFSLATM      | Cytochrome P450 2B1                                     | 1,713401253                    | 0,0214759                      | On           |
| 38        | PRPASVPPS      | Glycogen [starch] synthase                              | 0,963713349                    | 0,226456838                    |              |
| 39        | SSRPSSNRS      | vimentin                                                | 1,344011991                    | 0,373603041                    |              |
| 40        | TKFASDDEH      | Lupus La protein                                        | 0,667175292                    | 0,17848349                     |              |
| 41        | LSDDSFIED      | DNA topoisomerase II                                    | 1,067067263                    | 0,456609637                    |              |
| 42        | PSPKTPPGS      | Microtubule-associated protein tau                      | 0,591974237                    | 0,158370849                    |              |
| 43        | KDIGSESTE      | Alpha-S1 casein                                         | 0,913472873                    | 0,016411094                    | On           |
| 44        | KRRGSVPIL      | erythrocyte protein 4.2                                 | 2,27415283                     | 0,498924706                    | On           |
| 45        | KRAKAKAKKR     | Myosin regulatory light chain 2                         | 3,924338736                    | 1,028289381                    | On           |
| 46        | QSYSSQRV       | Desmin                                                  | 0,889252521                    | 0,224880994                    |              |
| 47        | KGTGYIKTE      | Signal Transducer and Activator of Transcription 1      | 1,328293017                    | 0,353909957                    |              |
| 48        | KRSLSEMEI      | Serum response factor                                   | 0,564137514                    | 0,21583418                     |              |
| 49        | KRKQGSVRGL     | Glycogen phosphorylase                                  | 1,908210718                    | 0,12403773                     | On           |
| 50        | HTRDSEAQR      | erythrocyte band 7                                      | 0,434474967                    | 0,054493635                    |              |
| 51        | MAEVSWKVL      | Phosphorylase b kinase beta                             | 0,424272092                    | 0,092258852                    |              |
| 52        | EEGISQESS      | high mobility group protein                             | 0,272251505                    | 0,043397419                    |              |
| 53        | EQQQTEDEL      | Beta casein                                             | 0,36382855                     | 0,039801669                    |              |
| 54        | IGEGTYGVV      | Cell division protein kinase 2                          | 0,488716878                    | 0,13846286                     |              |
| 55        | MMPYVVVTR      | Stress-activated protein kinase JNK1                    | 0,478185913                    | 0,090710062                    |              |

|     |                |                                                         |             |             |    |
|-----|----------------|---------------------------------------------------------|-------------|-------------|----|
| 56  | PYKFPSSPLRIPGZ |                                                         | 0,446342559 | 0,188403846 |    |
| 57  | GQEVYVKKT      | PTK receptor for angiotensin 1 (TEK)                    | 0,863122767 | 0,183624675 |    |
| 58  | AQETSGEEI      | insulin-like growth factor binding protein 1            | 0,370319776 | 0,054287579 |    |
| 59  | DKAKSRPSL      | fructose-1,6-bisphosphatase                             | 0,777275825 | 0,012864236 | On |
| 60  | FPVSYSSSG      | Probable receptor with tyrosine-protein kinase activity | 0,363627781 | 0,100100887 |    |
| 61  | GRLSSMAMI      | myosin light chain kinase                               | 0,457447439 | 0,12944115  |    |
| 62  | EEDLSDENI      | transcription factor BAF1                               | 0,485652333 | 0,113453047 |    |
| 63  | EPGPYAQPS      | Proto-oncogene C-crk                                    | 0,506015179 | 0,176490401 |    |
| 64  | RRRASQLKV      | Gamma-aminobutyric-acid receptor beta                   | 0,805078106 | 0,118441669 |    |
| 65  | SGADYPDEL      | Trypsin I                                               | 0,820000904 | 0,217474049 |    |
| 66  | KQISVR         | Glycogen phosphorylase                                  | 1,67829585  | 0,732940266 |    |
| 67  | SLKDH          | L-lactate dehydrogenase M                               | 0,413401559 | 0,070687405 |    |
| 68  | APRTAGGRR      | Myelin basic protein                                    | 1,734612988 | 0,330777918 | On |
| 69  | DGHEYIYVD      | platelet-derived growth factor receptor                 | 0,53053486  | 0,129587388 |    |
| 70  | FKRSYEEHI      | Insulin Receptor (IR)                                   | 0,486831366 | 0,201872866 |    |
| 71  | REARSRAST      | cAMP-dependent protein kinase II (PKA)                  | 1,106627142 | 0,157619707 | On |
| 72  | DRVYVHPF       | Angiotensinogen                                         | 0,508267669 | 0,185343015 |    |
| 73  | VRRSDAA        | Troponin I                                              | 0,450259561 | 0,051567426 |    |
| 74  | RRKMSRGLP      | Volt.-dep. L-type calcium channel alpha-1S              | 1,00329714  | 0,16493948  |    |
| 75  | SEVPYREVQ      | Tyrosine-protein kinase Src64B (hom MAP3K10)            | 0,532356578 | 0,110679986 |    |
| 76  | PRRASATSS      | Glycogen [starch] synthase                              | 0,69970472  | 0,112499486 |    |
| 77  | RRLSI          | phosphorylase b kinase alpha                            | 1,638237512 | 0,413029258 | On |
| 78  | STLSLSPFYL     | Alpha crystallin B                                      | 0,581240213 | 0,186874884 |    |
| 79  | TRDIYETDY      | Insulin Receptor (IR)                                   | 1,276775439 | 0,572930647 |    |
| 80  | VPTLSTFRT      | Desmin                                                  | 0,886288671 | 0,037090748 | On |
| 81  | RASTSKSES      | 40S ribosomal protein S6                                | 0,52507009  | 0,17364385  |    |
| 82  | SPSSSPTHE      | phosphorylcholine transferase                           | 0,533602186 | 0,160843081 |    |
| 83  | STNDSLL        | Beta-2 adrenergic receptor                              | 0,539780226 | 0,081625046 |    |
| 84  | VRTFTHEVV      | Cell division protein kinase 2                          | 0,468561991 | 0,110496116 |    |
| 85  | SRKMSVQEY      | phosducin                                               | 0,675726525 | 0,070875244 |    |
| 86  | LSGLSFKRN      | MARCKS-related protein                                  | 1,400448124 | 0,388383609 |    |
| 87  | PTGTTQQRK      | Kinesin-related motor protein Eg5                       | 0,58629729  | 0,205049668 |    |
| 88  | STLASSFKR      | glutamate (NMDA) receptor subunit zeta 2                | 1,418718049 | 0,497623865 |    |
| 89  | TPPKSPSSA      | Microtubule-associated protein tau                      | 0,507863227 | 0,071170413 |    |
| 90  | PAAVSEHGD      | Na+/K+ ATPase 1                                         | 0,434118627 | 0,098382039 |    |
| 91  | PVSPSLVQG      | muscarinic acetylcholine receptor M2                    | 0,439091326 | 0,13595412  |    |
| 92  | KKDASDDLD      | eukaryotic translation initiation factor 2 beta         | 0,536645796 | 0,210454488 |    |
| 93  | KSRPSLPLP      | fructose-1,6-bisphosphatase                             | 1,221869903 | 0,284305091 |    |
| 94  | LSVSSLPGL      | Glycogen [starch] synthase                              | 0,532979241 | 0,140467569 |    |
| 95  | SRHSSPHQS      | Glycogen [starch] synthase                              | 0,538095049 | 0,097042581 |    |
| 96  | KKPPTPPPE      | Large T antigen                                         | 0,957219687 | 0,254688818 |    |
| 97  | KVPQTPLHT      | MAP kinase-activated protein kinase 2                   | 1,265872362 | 0,453353768 |    |
| 98  | PRRSSIRNA      | Neutrophil cytosol factor 1, p47-PHOX                   | 0,521920667 | 0,144399984 |    |
| 99  | ILDTTGQEE      | K-Ras                                                   | 0,555692744 | 0,228857785 |    |
| 100 | NDSNYIVKG      | Macrophage colony stimulating factor I receptor         | 0,422904357 | 0,09003444  |    |
| 101 | EFLRTSAGS      | 5'-AMP-activated protein kinase                         | 0,389358853 | 0,022409999 |    |
| 102 | ERTNSLPPV      | Volt.-dep. L-type calcium channel alpha-1S              | 0,304216923 | 0,025647728 |    |
| 103 | IRRASTIEM      | Cardiac phospholamban                                   | 0,623121625 | 0,165721252 |    |
| 104 | NFDDYMKSL      | Fatty acid-binding protein                              | 0,545384969 | 0,136379289 |    |
| 105 | PYKFPSSPLRIPGZ |                                                         | 0,4864813   | 0,146720111 |    |
| 106 | GRTGRRNSI      |                                                         | 2,665350174 | 0,63170053  | On |
| 107 | ATPIYLDIL      | TrkC tyrosine kinase                                    | 0,720991281 | 0,148206062 |    |
| 108 | DMRQTVAVG      | elongation factor 1-alpha 1                             | 0,406731769 | 0,144827328 |    |
| 109 | GDRFTDEEV      | Myosin regulatory light chain 2                         | 0,765136059 | 0,223628734 |    |
| 110 | GSGSSVTSR      | Desmin                                                  | 0,580029713 | 0,167692508 |    |
| 111 | EEPQYEEIP      | Middle T antigen                                        | 0,754641547 | 0,407555112 |    |

|     |                |                                                         |             |             |    |
|-----|----------------|---------------------------------------------------------|-------------|-------------|----|
| 112 | ERRLSLVPD      | cystic fibrosis transmembrane conductance regulator     | 0,576359574 | 0,217106309 |    |
| 113 | RRSSSRPIR      | Protamine YI                                            | 2,067958168 | 0,305396647 | On |
| 114 | SKIGSTENL      | Microtubule-associated protein tau                      | 0,416584446 | 0,065770262 |    |
| 115 | NDMTSL         | Tropomyosin 1 alpha                                     | 0,328605595 | 0,045871782 |    |
| 116 | AARLSLTDP      | platelet glycoprotein IB                                | 0,293129362 | 0,017784598 |    |
| 117 | ARRSTTDAG      | Choriogonadotropin beta                                 | 0,308997054 | 0,110816726 |    |
| 118 | DLKDTKYKL      | myosin II heavy chain                                   | 0,37903639  | 0,086284338 |    |
| 119 | GAFSTVKGV      | rhodopsin kinase                                        | 0,690061279 | 0,232847708 |    |
| 120 | RGRASSHSS      | Lamin A/C                                               | 1,278652834 | 0,265908321 | On |
| 121 | RKRRAEF        | Histone H2B                                             | 0,695634042 | 0,039861602 |    |
| 122 | LRAASLG        | Red cell/liver pyruvate kinase                          | 0,614606967 | 0,065174474 |    |
| 123 | RRRQSVLNL      | cystic fibrosis transmembrane conductance regulator     | 1,355348266 | 0,260975018 | On |
| 124 | SIDEYFSEQ      | Interferon receptor                                     | 0,576687971 | 0,064609605 |    |
| 125 | EESESD         | synaptic vesicle amine transporter                      | 0,703614687 | 0,135862811 |    |
| 126 | RRRS           | Troponin I                                              | 2,205073052 | 0,295549374 | On |
| 127 | TAYGTRRHL      | calponin alpha and beta                                 | 1,845943775 | 0,260373241 | On |
| 128 | TRRISQTSQ      | ryanodine receptor                                      | 1,096718427 | 0,243681923 |    |
| 129 | VTPRTPPPS      | Myelin basic protein                                    | 0,506127608 | 0,059389424 |    |
| 130 | REVSSLKSK      | myosin heavy chain                                      | 0,915828535 | 0,166893878 |    |
| 131 | PEETQTQD       | HSP90-alpha                                             | 0,46238229  | 0,011475689 |    |
| 132 | KKQISVR        | Glycogen phosphorylase                                  | 1,540696879 | 0,189034283 | On |
| 133 | WLTKSPDGN      | caldesmon                                               | 0,479394394 | 0,077570101 |    |
| 134 | SRRSSLGSL      | Volt.-dep. L-type calcium channel alpha-1S              | 1,838959399 | 0,563628836 |    |
| 135 | PETVYEVAG      | Cortactin                                               | 1,002574009 | 0,293481241 |    |
| 136 | QEPGSGPPE      | somatostatin receptor type 3                            | 0,372541352 | 0,012683715 |    |
| 137 | SVSSSPIKE      | transcriptional factor SWI5                             | 0,462307272 | 0,050457234 |    |
| 138 | TRLHSLRER      | Sucrose synthase 1                                      | 1,476424972 | 0,19804839  | On |
| 139 | PKEVYDVML      | TrkC tyrosine kinase                                    | 0,399766695 | 0,108490179 |    |
| 140 | PRTPGGRR       | Myelin basic protein                                    | 2,248276154 | 0,617791441 | On |
| 141 | KLSPSPSSR      | Lamin B1                                                | 1,247741026 | 0,234320199 | On |
| 142 | LEKKYVRRD      | macrophage colony stimulating factor 1 receptor         | 1,281087324 | 0,335431785 |    |
| 143 | QASSTPLSP      | Lamin A/C                                               | 0,459160646 | 0,049398206 |    |
| 144 | SRRDSLFP       | Sodium channel protein type II alpha                    | 0,500804288 | 0,194553499 |    |
| 145 | KQPIYVME       | Tyrosine-protein kinase transforming protein Fps        | 0,524057156 | 0,12688638  |    |
| 146 | LLQDSVDFS      | vimentin                                                | 0,596829129 | 0,246187973 |    |
| 147 | QLSTSEENS      | Alpha-S2 casein                                         | 0,386748817 | 0,043677402 |    |
| 148 | KIQASFRGH      | neurogranin                                             | 1,917190074 | 0,410984352 | On |
| 149 | NKGASQAGM      | calponin alpha and beta                                 | 0,670443633 | 0,070285148 |    |
| 150 | EIVESLSSS      | Beta casein                                             | 0,479622461 | 0,061734058 |    |
| 151 | ESSNYMAPY      | platelet-derived growth factor receptor                 | 0,530346554 | 0,107429379 |    |
| 152 | KRPSKRAKA      | Myelin basic protein                                    | 1,162344476 | 0,076935234 | On |
| 153 | NRAITARRQ      | Troponin I                                              | 1,200977921 | 0,054734543 | On |
| 154 | PYKFPSSPLRIPGZ |                                                         | 0,573261868 | 0,122081261 |    |
| 155 | GSRPSESNG      | Lens fiber major intrinsic protein                      | 0,534345015 | 0,161784213 |    |
| 156 | DAHKSKRQH      | transcription factor BAF1                               | 0,607308031 | 0,12687084  |    |
| 157 | DSLIYDDGL      | Probable receptor with tyrosine-protein kinase activity | 0,938094618 | 0,441023066 |    |
| 158 | GGRDSRSGS      | Myelin basic protein                                    | 0,621512048 | 0,015379149 |    |
| 159 | GVERSVRPT      | phosphorylase b kinase alpha                            | 0,538868194 | 0,18668069  |    |
| 160 | EGVKSDQAE      | neurofilament triplet M                                 | 0,530106656 | 0,101966187 |    |
| 161 | ESLSSSEES      | Beta casein                                             | 0,540979946 | 0,07470996  |    |
| 162 | RVRMSADAM      | Troponin I                                              | 0,415113561 | 0,010520441 |    |
| 163 | SNPTYSVMR      | Middle T antigen                                        | 0,969819785 | 0,285547016 |    |
| 164 | SSKRAK         | Myosin regulatory light chain 2                         | 0,9867168   | 0,152675094 |    |
| 165 | AGDGSDEEV      | myosin heavy chain                                      | 0,607593392 | 0,049004803 |    |
| 166 | AVDRYIAIT      | Beta-2 adrenergic receptor                              | 0,559831136 | 0,093802684 |    |
| 167 | DPLLTFRFP      | Lamin A/C                                               | 0,469783779 | 0,178629514 |    |

|     |               |                                                  |             |             |    |
|-----|---------------|--------------------------------------------------|-------------|-------------|----|
| 168 | GENIYIRHS     | erythrocyte protein 4.1                          | 0,756125741 | 0,135806359 |    |
| 169 | RLSPSPTSQ     | Lamin C                                          | 0,345834849 | 0,070102427 |    |
| 170 | RKESYSV       | Histone H2B                                      | 0,377333859 | 0,073833014 |    |
| 171 | PLSRTL        | Glycogen [starch] synthase                       | 0,431647172 | 0,099696464 |    |
| 172 | RSRASTPPA     | cAMP-dependent protein kinase II (PKA)           | 0,677371925 | 0,068087411 |    |
| 173 | SLSSSEESI     | Beta casein                                      | 0,783702699 | 0,177425885 |    |
| 174 | LRRASLAG      | Red cell/liver pyruvate kinase                   | 1,398683991 | 0,30489365  | On |
| 175 | ADSESEDEE     | cAMP-dependent protein kinase II (PKA)           | 1,29888831  | 0,381219425 |    |
| 176 | THERSPSPS     | phosphorylcholine transferase                    | 0,333783653 | 0,103821208 |    |
| 177 | TVTRSRSV      | Lamin A/C                                        | 2,388708698 | 0,799071658 | On |
| 178 | YETDYRKG      | Insulin Receptor (IR)                            | 0,979413337 | 0,267616531 |    |
| 179 | RKQISVRGL     | Glycogen phosphorylase                           | 1,140388481 | 0,092472183 | On |
| 180 | AGTTYAL       | myosin heavy chain IA (fragment)                 | 0,384434503 | 0,144430117 |    |
| 181 | LRRASVA       | pyruvate kinase                                  | 1,372868553 | 0,36714144  |    |
| 182 | YRGYSLGNW     | Lysozyme C                                       | 0,538677827 | 0,098259766 |    |
| 183 | SSLKSRKRA     | spermatid nuclear transition protein 1           | 1,773226791 | 0,621655517 |    |
| 184 | PMRRSVSEA     | hormone sensitive lipase                         | 0,505050759 | 0,098517494 |    |
| 185 | RSKRSGSV      | phosphorylase b kinase beta                      | 2,460560881 | 0,620914728 | On |
| 186 | TEGQYQQQP     | Proto-oncogene tyrosine-protein kinase Lck       | 0,578438518 | 0,170244066 |    |
| 187 | TTPLSPTRL     | Lamin B2                                         | 0,86984826  | 0,104102379 |    |
| 188 | PQPEYVNQP     | Receptor tyrosine-protein kinase erbB-2          | 0,482376614 | 0,066189477 |    |
| 189 | VKRGISGL      | Histone H4                                       | 1,177904612 | 0,124144795 | On |
| 190 | KRKQISVRG     | Glycogen phosphorylase                           | 1,97011851  | 0,56376294  | On |
| 191 | LPVPSTHIG     | cGMP-dependent protein kinase (PKG)              | 0,586086143 | 0,05581254  |    |
| 192 | QRRHSLEPP     | Tyrosine-protein kinase transforming protein SRC | 0,535517925 | 0,072441035 |    |
| 193 | SRTLSVSSL     | Glycogen [starch] synthase                       | 0,580445409 | 0,080842199 |    |
| 194 | KRPSEAKA      | Myelin basic protein                             | 1,651055    | 0,057753269 | On |
| 195 | LRGRSFMNN     | 6-phosphofruktokinase                            | 0,999247996 | 0,208382256 |    |
| 196 | QRVSSYRRT     | Desmin                                           | 2,266717631 | 0,49107146  | On |
| 197 | HDLSEMFN      | Prolactin                                        | 0,576500469 | 0,126153319 |    |
| 198 | KRPSRAKA      | Myelin basic protein                             | 1,972854115 | 0,426206559 | On |
| 199 | EDNEYTARP     | Proto-oncogene tyrosine-protein kinase Src       | 2,038536105 | 1,494061514 |    |
| 200 | ENAPSSTSS     | DNA topoisomerase II                             | 0,622486022 | 0,086488969 |    |
| 201 | HMRSSMSGL     | acetyl-CoA carboxylase                           | 1,035403258 | 0,279613279 |    |
| 202 | LDRSSHAQR     | Insulin Receptor (IR)                            | 0,567729175 | 0,141151515 |    |
| 203 | PYKFPSSPLIPGZ |                                                  | 0,546720959 | 0,230954481 |    |
| 204 | GKEIYNTIR     | Ras p21 activator protein                        | 0,76370935  | 0,131263854 |    |
| 205 | APATPGGRR     | Myelin basic protein                             | 1,617610752 | 0,091188518 | On |
| 206 | DEEESSEAK     | elongation factor 1-beta                         | 0,715418665 | 0,180148047 |    |
| 207 | FFKKSIST      | glutamate receptor 6                             | 1,762021507 | 0,800936043 |    |
| 208 | GMGTSVERA     | pyruvate dehydrogenase E1                        | 0,585258867 | 0,14444236  |    |
| 209 | DYDSSDIED     | cactus                                           | 1,932774921 | 1,089141183 |    |
| 210 | EKRASQAF      | stathmin                                         | 0,714282069 | 0,138600915 |    |
| 211 | RRAVSELDA     | tyrosine 3-monooxygenase                         | 0,612475196 | 0,04489631  |    |
| 212 | SDGGYMDMS     | platelet-derived growth factor receptor          | 0,698391039 | 0,103589136 |    |
| 213 | NWHMTPPRK     | serine/threonine protein phosphatase PP1         | 1,045213318 | 0,272951241 |    |
| 214 | RRASI         | pyruvate kinase                                  | 1,80883787  | 0,376714441 | On |
| 215 | AKKGSEQES     | cAMP-dependent protein kinase (PKA)              | 0,61222233  | 0,202620978 |    |
| 216 | DDMTGYVA      | Mitogen-activated protein kinase p38             | 0,77994958  | 0,355325849 |    |
| 217 | ETDYRKG       | Insulin Receptor (IR)                            | 0,834526076 | 0,18628642  |    |
| 218 | YVTTSTRTY     | vimentin                                         | 0,903613999 | 0,248244817 |    |
| 219 | SPQPSRRGS     | protein phosphatase 1                            | 1,809368203 | 0,322770278 | On |
| 220 | RRAASVA       | pyruvate kinase                                  | 1,47183611  | 0,145046941 | On |
| 221 | RPSENGQP      | Lens fiber major intrinsic protein               | 0,488509148 | 0,096962599 |    |
| 222 | SASTPVKK      | Histone H1                                       | 1,027757256 | 0,110261664 | On |
| 223 | NSYGSRGN      | iron-responsive element binding protein          | 1,802942611 | 0,270818635 | On |

|     |                |                                                         |             |             |    |
|-----|----------------|---------------------------------------------------------|-------------|-------------|----|
| 224 | LRRASL         | pyruvate kinase                                         | 0,922876965 | 0,249058564 |    |
| 225 | SSTDSADSG      | Early E1A                                               | 0,637838647 | 0,168194108 |    |
| 226 | TKSGSTTKN      | eukaryotic translation initiation factor 4E             | 1,048913994 | 0,168908212 |    |
| 227 | VETTYADFI      | cAMP-dependent protein kinase inhibitor alpha           | 0,732342427 | 0,231274611 |    |
| 228 | YSFTTTAER      | Actin                                                   | 0,491976953 | 0,140696903 |    |
| 229 | SPFKYQSL       | Beta-2 adrenergic receptor                              | 0,543491079 | 0,283545003 |    |
| 230 | RKRSAAE        | Histone H2B                                             | 0,954139321 | 0,255662698 |    |
| 231 | VIKRSPRKR      | transcriptional factor SWI6                             | 2,638357548 | 0,207912176 | On |
| 232 | SPVKSPEAK      | neurofilament triplet M                                 | 0,741054437 | 0,166304714 |    |
| 233 | LRRASVAQL      | pyruvate kinase                                         | 1,884698437 | 0,647038228 |    |
| 234 | PRMPSLSVP      | Sodium channel protein                                  | 0,52561676  | 0,206966268 |    |
| 235 | SSPVYQDAV      | Cortactin                                               | 0,731652429 | 0,343117384 |    |
| 236 | TKDLYDALH      | T-cell surface glycoprotein CD3 zeta                    | 0,636817504 | 0,25633081  |    |
| 237 | LRSPSWEPF      | Heat Shock Protein 26                                   | 0,707524792 | 0,292411753 |    |
| 238 | PSLPTPPTR      | Microtubule-associated protein tau                      | 0,987696655 | 0,27803747  |    |
| 239 | KASASPRRK      | Histone H3                                              | 2,75308168  | 0,202913857 | On |
| 240 | KRRDYDLA       | Probable receptor with tyrosine-protein kinase activity | 0,749020927 | 0,247828472 |    |
| 241 | PAPAVRASDRA    | Troponin I                                              | 0,646053729 | 0,114303796 |    |
| 242 | QSRASDKQT      | T-cell surface glycoprotein CD3 gamma                   | 0,543641994 | 0,190910965 |    |
| 243 | KGQESFKKQ      | Nucleophosmin                                           | 1,56283266  | 0,317987054 | On |
| 244 | KRSGSVYEP      | phosphorylase b kinase beta                             | 1,613735403 | 0,313303296 | On |
| 245 | KRAQISVRGL     | Glycogen phosphorylase                                  | 2,408794637 | 0,256292821 | On |
| 246 | HSSSQGGG       | Lamin C                                                 | 0,552806651 | 0,23744298  |    |
| 247 | MAEAYSEIG      | T-cell surface glycoprotein CD3 zeta                    | 0,942987976 | 0,152820801 |    |
| 248 | EEESSYSYE      | RNA polymerase alpha                                    | 2,34752816  | 1,561301943 |    |
| 249 | EQPGSDEED      | Ornithine decarboxylase                                 | 0,768929104 | 0,150501867 |    |
| 250 | IEQFSTVKG      | G protein-coupled receptor kinase 5                     | 0,5039955   | 0,168015635 |    |
| 251 | MLDHSESTK      | myelin                                                  | 0,570259781 | 0,142912347 |    |
| 252 | PYKFPSSPLRIPGZ |                                                         | 0,600945481 | 0,214892833 |    |
| 253 | GPRTTAQQ       | cGMP-dependent protein kinase (PKG)                     | 1,398660613 | 0,098346394 | On |
| 254 | AQDTYLVLD      | Erythropoietin Receptor                                 | 0,706767613 | 0,247328433 |    |
| 255 | DIPESQMEE      | Band 3 anion transport protein                          | 0,751654894 | 0,151690742 |    |
| 256 | FPRASFGSR      | Desmin                                                  | 1,604581247 | 0,297384317 | On |
| 257 | GRKASGSSP      | myosin light chain kinase                               | 1,032285338 | 0,112787908 | On |
| 258 | EDVGSDEEE      | HSP90-alpha                                             | 0,897701826 | 0,359687403 |    |
| 259 | EPAVSPLLP      | Tyrosine-protein kinase Dash/Abl                        | 0,608501028 | 0,132679738 |    |
| 260 | RRRASQLKI      | Gamma-aminobutyric-acid receptor beta-2                 | 0,731171593 | 0,111348974 |    |
| 261 | SFTTTAERE      | Actin                                                   | 0,514951555 | 0,187695533 |    |
| 262 | PLSRTL         | glycogen synthase                                       | 0,559409386 | 0,201618828 |    |
| 263 | SGRGK          | Histone H4                                              | 1,201152915 | 0,06388473  | On |
| 264 | APRSPGGRR      | Myelin basic protein                                    | 2,029508754 | 0,237858813 | On |
| 265 | DGERYDEDE      | Glycogen [starch] synthase                              | 1,013974543 | 0,197771404 |    |
| 266 | FKRPTLRRV      | troponin I                                              | 2,088037521 | 0,226647619 | On |
| 267 | REAEYEPET      | Cortactin                                               | 0,928331394 | 0,367236146 |    |
| 268 | DRVYIHPF       | Angiotensinogen                                         | 0,703754481 | 0,237361565 |    |
| 269 | VRRISGL        | Histone H4                                              | 1,661746067 | 0,126911572 | On |
| 270 | RRKGTDVNV      | Annexin I                                               | 1,084846552 | 0,193862827 |    |
| 271 | SETKTEEEE      | DNA topoisomerase II                                    | 0,687712324 | 0,184284521 |    |
| 272 | PQRATSNVF      | Myosin regulatory light chain 2                         | 0,571060839 | 0,106220141 |    |
| 273 | RRGSV          | pyruvate kinase or palladin                             | 1,650843415 | 0,126428506 | On |
| 274 | STSKSESSQ      | 40S ribosomal protein S6                                | 0,545596477 | 0,183296772 |    |
| 275 | TRAPSRTAS      | ATP-citrate (pro-S-) lyase                              | 1,29887582  | 0,290198096 |    |
| 276 | VPRTPGGRR      | Myelin basic protein                                    | 2,264041495 | 0,160538527 | On |
| 277 | RASSRSVR       | Lamin B0                                                | 2,651618954 | 0,478571731 | On |
| 278 | SPSSPASL       | phosphorylcholine transferase                           | 0,557308252 | 0,144075492 |    |
| 279 | RVYVHPF        |                                                         | 1,27840446  | 0,368080483 |    |



|     |                |                                                     |             |             |    |
|-----|----------------|-----------------------------------------------------|-------------|-------------|----|
| 280 | VRRVSDDDR      | Tyrosine 3-monooxygenase                            | 0,461479112 | 0,041673321 |    |
| 281 | SRKMSIQEY      | phosducin                                           | 0,696745434 | 0,1400312   |    |
| 282 | LSGFSEKKS      | myristolated alanine-rich C-kinase substrate        | 1,394407384 | 0,386414723 |    |
| 283 | PSSTSSSSI      | DNA topoisomerase II                                | 0,521575749 | 0,119416915 |    |
| 284 | STGIYEAL       | Alpha enolase                                       | 0,994451447 | 0,42082368  |    |
| 285 | TPPKSPSAS      | Microtubule-associated protein tau                  | 0,466266889 | 0,070061471 |    |
| 286 | LYSSSPGGA      | vimentin                                            | 0,407167613 | 0,13039809  |    |
| 287 | PVPKSPVEE      | neurofilament triplet M                             | 0,421984925 | 0,131273221 |    |
| 288 | KKASFKAKK      |                                                     | 2,58036058  | 0,524396044 | On |
| 289 | KSPAKTPVK      | Actin and myosin binding protein                    | 1,831797589 | 0,48368532  | On |
| 290 | PLSKTSLVSS     | Glycogen [starch] synthase                          | 0,507204586 | 0,060796791 |    |
| 291 | SRGKSSSYS      | Fibrinogen alpha                                    | 1,089298644 | 0,045457403 | On |
| 292 | KKLGSKKPQ      | Sodium channel protein type II alpha                | 1,870957167 | 0,82497829  |    |
| 293 | KTASTRKV       | cystic fibrosis transmembrane conductance regulator | 2,428447256 | 0,409190559 | On |
| 294 | PRRTRRAS       | Protamine YII                                       | 0,537854221 | 0,04122637  |    |
| 295 | IHQRSRRL       | Neutrophil cytosol factor 2                         | 1,326005921 | 0,408281245 |    |
| 296 | NDALSGSGN      | galectin-3                                          | 0,481271612 | 0,061524692 |    |
| 297 | EETQTQDQP      | HSP90-alpha                                         | 0,319382658 | 0,078282981 |    |
| 298 | ERSQSRKDS      | alpha-1B adrenergic receptor                        | 0,378443896 | 0,082902736 |    |
| 299 | IRQASQAGP      | synapsins                                           | 0,370624238 | 0,059082472 |    |
| 300 | NFDDYMKEV      | Fatty acid-binding protein                          | 0,412799713 | 0,054805029 |    |
| 301 | PYKFPSSPLRIPGZ |                                                     | 0,32798084  | 0,057998431 |    |
| 302 | GRRQSLIQD      | tyrosine 3-monooxygenase                            | 0,514453485 | 0,013677048 |    |
| 303 | ASFEYTILD      | Erythropoietin Receptor                             | 0,630559035 | 0,16060349  |    |
| 304 | DLSTYASIN      | Insulin receptor substrate 2                        | 0,456714556 | 0,046135591 |    |
| 305 | GDNDYIPL       | platelet-derived growth factor receptor             | 0,546305525 | 0,185841095 |    |
| 306 | GSESTEDQA      | Alpha-S1 casein                                     | 0,23996076  | 0,011584716 |    |
| 307 | EENVSVDDT      | eukaryotic translation initiation factor 4E         | 0,39108898  | 0,139964705 |    |
| 308 | ERRKSKSGA      | cAMP-regulated phosphoprotein 21                    | 0,619081312 | 0,151239232 |    |
| 309 | RRRSRSRS       | Lamin B receptor                                    | 2,947370786 | 0,595967685 | On |
| 310 | SKIGSLDNI      | Microtubule-associated protein tau                  | 0,456747995 | 0,04105449  |    |
| 311 | NDITSL         | Tropomyosin beta                                    | 0,454137553 | 0,056125309 |    |
| 312 | AARGSFDA       | rhodopsin kinase                                    | 0,344207944 | 0,051705356 |    |
| 313 | ARNDVTVA       | cAMP response element-binding protein CRE-BP1       | 0,287757652 | 0,04378076  |    |
| 314 | DLFGSDEED      | elongation factor 1-beta                            | 0,596188686 | 0,276375531 |    |
| 315 | FSSRSYTSG      | Keratin 8                                           | 0,781687648 | 0,228566222 |    |
| 316 | RGKSSYSK       | Fibrinogen alpha                                    | 1,121731547 | 0,597744379 |    |
| 317 | RKRSRAEA       | Histone H2B                                         | 0,650585079 | 0,19097682  |    |
| 318 | LKRASLG        | pyruvate kinase                                     | 0,529040745 | 0,060892899 |    |
| 319 | RRRPTPATL      | Protein phosphatase inhibitor 1                     | 0,982576784 | 0,143747347 |    |
| 320 | SIADTFVGT      | Serine/threonine-protein kinase STE7                | 0,355251687 | 0,067134611 |    |
| 321 | LRRNSI         | cystic fibrosis transmembrane conductance regulator | 0,816989667 | 0,244281589 |    |
| 322 | RRRRASVA       | pyruvate kinase                                     | 2,947639491 | 0,829543345 | On |
| 323 | TATDYHTTS      | Band 3 anion transport protein                      | 0,403451907 | 0,044931355 |    |
| 324 | TRRASRPVR      | Protamine YII                                       | 1,438958585 | 0,534738612 |    |
| 325 | VSSSYRRM       | vimentin                                            | 1,558176139 | 0,402464899 | On |
| 326 | REVSSLKKNK     | myosin heavy chain                                  | 0,759540675 | 0,218960564 |    |
| 327 | LSYRRYSL       |                                                     | 1,190586721 | 0,323469271 |    |
| 328 | KKKASVA        | pyruvate kinase                                     | 0,693135858 | 0,383151035 |    |
| 329 | WKRTSMKLL      | dihydropyridine-sensitive calcium channel           | 0,745174581 | 0,292086478 |    |
| 330 | SRRQSVLVK      | glutamate receptor 6                                | 1,229199893 | 0,280479833 |    |
| 331 | PENDYEDVE      | Hematopoietic cell-specific LYN substrate           | 1,346788171 | 0,671968458 |    |
| 332 | QEGLYNELQ      | T-cell surface glycoprotein CD3 zeta                | 0,500454267 | 0,120279649 |    |
| 333 | SVPPSPSLS      | Glycogen [starch] synthase                          | 0,413494082 | 0,113800724 |    |
| 334 | TRKVSLAPQ      | cystic fibrosis transmembrane conductance regulator | 0,476795624 | 0,122813829 |    |
| 335 | PKDPSQRRR      | Proto-oncogene tyrosine-protein kinase Src          | 0,840955404 | 0,222839262 |    |

|     |                |                                                           |             |             |    |
|-----|----------------|-----------------------------------------------------------|-------------|-------------|----|
| 336 | KRKQISVR       | Glycogen phosphorylase                                    | 2,35460572  | 1,414565558 |    |
| 337 | KLRRSSSVG      | Acetylcholine receptor protein delta                      | 2,44235231  | 0,506292467 | On |
| 338 | LDPLSEPED      | Thyroid hormone receptor alpha                            | 0,626358388 | 0,118807394 |    |
| 339 | QAGMTAPGT      | calponin alpha and beta                                   | 0,306199647 | 0,031871119 |    |
| 340 | SRRASRPVR      | Protamine Z                                               | 1,109131304 | 0,152303584 | On |
| 341 | KPGFSPQPS      |                                                           | 0,586393918 | 0,214957967 |    |
| 342 | LLPMSPEEF      | Signal Transducer and Activator of Transcription 1        | 0,450597804 | 0,108588232 |    |
| 343 | QLNDSSEEE      | E7 protein                                                | 0,524591979 | 0,09887982  |    |
| 344 | KGGSYSQAA      | HLA class I histocompatibility antigen B7                 | 0,804013383 | 0,239475101 |    |
| 345 | NIYISPLKS      | Retinoblastoma-associated protein                         | 0,789589158 | 0,257491309 |    |
| 346 | EIRVSINEK      | cGMP-dependent protein kinase (PKG)                       | 0,435136256 | 0,073778511 |    |
| 347 | ESRISLPLP      | vimentin                                                  | 0,476364164 | 0,129858197 |    |
| 348 | KRPSIRAKA      | Myelin basic protein                                      | 2,238766486 | 0,032139954 | On |
| 349 | NPGFYVEAN      | 1-phosphatidylinositol-4,5-bisphosphate phosphodiesterase | 0,775251106 | 0,232703571 |    |
| 350 | PYKFPSSPLRIPGZ |                                                           | 0,490757057 | 0,043108968 |    |
| 351 | GSRGSGSSV      | Desmin                                                    | 0,621032266 | 0,156646772 |    |
| 352 | DAGASPVEK      | myristolated alanine-rich C-kinase substrate (MARCKS)     | 0,355452557 | 0,021343536 |    |
| 353 | DRRVVAAE       | cAMP-dependent protein kinase II (PKA)                    | 0,304349951 | 0,026907269 |    |
| 354 | GGRASDYKS      | Myelin basic protein                                      | 0,636221958 | 0,106568701 |    |
| 355 | GVDTYVEMR      | Macrophage colony stimulating factor I receptor           | 0,606872955 | 0,185566632 |    |
| 356 | EGTHSTKRG      | Fibrinogen alpha                                          | 0,904257052 | 0,105684353 |    |
| 357 | ESLESYEIN      | Matrix Gla-protein                                        | 0,804581451 | 0,404688369 |    |
| 358 | RVRKTKGKY      | glutamate receptor 1                                      | 2,7156295   | 1,009668419 |    |
| 359 | SNPEYLSAS      | Insulin Receptor (IR)                                     | 0,595978549 | 0,044235621 |    |
| 360 | RRSTVA         | Protamines Z1 and Z2                                      | 1,259168287 | 0,074210112 | On |
| 361 | AEPGSPTAA      | myristolated alanine-rich C-kinase substrate (MARCKS)     | 0,367478519 | 0,044094653 |    |
| 362 | AVDGYVKPQ      | Signal Transducer and Activator of Transcription 5        | 0,478346578 | 0,095426009 |    |
| 363 | DPGVSYRTR      | pyruvate dehydrogenase E1                                 | 0,92820105  | 0,233241963 |    |
| 364 | GEINTEDDD      | calsequestrin                                             | 0,691615593 | 0,110823323 |    |
| 365 | RLSISTESQ      | phosphorylase b kinase alpha                              | 0,420678965 | 0,038494901 |    |
| 366 | RKEISVR        | Glycogen phosphorylase                                    | 1,363526546 | 0,322056609 |    |
| 367 | PGSPQKR        | Histone H2                                                | 0,364291762 | 0,064648179 |    |
| 368 | RSGYSSPGS      | Microtubule-associated protein tau                        | 0,713793554 | 0,033625517 |    |
| 369 | SLRASTSKS      | 40S ribosomal protein S6                                  | 1,421078034 | 0,158588429 | On |
| 370 | VRKISGL        | Histone H4                                                | 0,933756101 | 0,255239541 | On |
| 371 | ADGVYAASG      | Tyrosine-protein kinase transforming protein Fes          | 0,743092713 | 0,009177359 | On |
| 372 | TGFLTEYVA      | myelin                                                    | 0,64832686  | 0,123341842 |    |
| 373 | TVSTSLGHS      | muscarinic acetylcholine receptor M2                      | 0,382837917 | 0,053485777 |    |
| 374 | YDKEYYSVH      | Receptor tyrosine kinase for hepatocyte growth factor     | 0,776188312 | 0,260181023 |    |
| 375 | RKLSQGTR       | spermatid nuclear transition protein 2                    | 1,301930363 | 0,208929361 | On |
| 376 | NRKPSKDKD      | Gamma-aminobutyric-acid receptor gamma                    | 1,178312659 | 0,402719358 |    |
| 377 | LRRASPG        | pyruvate kinase                                           | 0,805655012 | 0,155887572 |    |
| 378 | YMAPYDNYV      | platelet-derived growth factor receptor                   | 1,014299292 | 0,367684259 |    |
| 379 | SSKAYGNGY      | Beta-2 adrenergic receptor                                | 0,549178558 | 0,10543786  |    |
| 380 | PLTPSGEAP      | EGF Receptor                                              | 0,578287127 | 0,141762939 |    |
| 381 | RRRRPTPA       | pyruvate kinase                                           | 4,303822638 | 0,133140295 | On |
| 382 | TEGQYQPQP      | Proto-oncogene tyrosine-protein kinase Lck                | 0,581677001 | 0,143358791 |    |
| 383 | TSSSIFDI       | DNA topoisomerase II                                      | 0,656950289 | 0,184652139 |    |
| 384 | PPSPSLSRH      | Glycogen [starch] synthase                                | 2,296073362 | 0,257694445 | On |
| 385 | SSKRAKAK       | Myosin regulatory light chain 2                           | 2,145961209 | 0,424772762 | On |
| 386 | KRKNSILNP      | cystic fibrosis transmembrane conductance regulator       | 1,196503091 | 0,177900543 | On |
| 387 | LNRMSFASN      | acetyl-CoA carboxylase                                    | 0,706058092 | 0,091231497 |    |
| 388 | QRHGSKYLA      | Myelin basic protein                                      | 0,609923712 | 0,13033811  |    |
| 389 | SRTASFSES      | ATP-citrate (pro-S-) lyase                                | 0,560034605 | 0,111814511 |    |
| 390 | KRPSDRAKA      | Myelin basic protein                                      | 2,126433217 | 0,314401782 | On |
| 391 | LRGPSWDPF      | Heat Shock Protein 27                                     | 0,71356396  | 0,078279033 |    |



|     |                |                                                           |             |             |    |
|-----|----------------|-----------------------------------------------------------|-------------|-------------|----|
| 392 | QRSTSTPNV      | RAF proto-oncogene ser/thr-protein kinase                 | 0,455522036 | 0,111180317 |    |
| 393 | HDALSGSGN      | galectin-3                                                | 0,73129888  | 0,192198809 |    |
| 394 | KRPSQRAKY      | Myelin basic protein                                      | 1,840283416 | 0,478845157 | On |
| 395 | EDNEYTARE      | Tyrosine-protein kinase Hck                               | 1,190008087 | 0,518520942 |    |
| 396 | ENAFSPSRS      | caldesmon                                                 | 0,590909134 | 0,243678342 |    |
| 397 | HKSGYLSSE      | Connection of cytoskeletal structure to plasma membrane   | 0,571006721 | 0,173945271 |    |
| 398 | LAYESHESM      | Matrix Gla-protein                                        | 0,633469072 | 0,168751456 |    |
| 399 | PYKFPSSPLRIPGZ |                                                           | 0,616482292 | 0,08808936  |    |
| 400 | GHQGTVPSPD     | Beta-2 adrenergic receptor                                | 0,540866032 | 0,161408931 |    |
| 401 | ANDEYFIRK      | Acetylcholine receptor protein beta                       | 0,527925019 | 0,172071299 |    |
| 402 | DEASTTVSK      | Rhodopsin                                                 | 0,647014881 | 0,168686415 |    |
| 403 | FEARYQQPF      | 1-phosphatidylinositol-4,5-bisphosphate phosphodiesterase | 0,63058616  | 0,147740464 |    |
| 404 | GLLRSWNDP      | Prolactin                                                 | 0,707060437 | 0,213095166 |    |
| 405 | DTVTSQRA       | Proto-oncogene tyrosine-protein kinase Src                | 1,402358079 | 0,997425998 |    |
| 406 | EKHHSIDAQ      | Phosphoenolpyruvate carboxylase 1                         | 0,571430379 | 0,120858107 |    |
| 407 | RRASTIEMP      | Cardiac phospholamban                                     | 0,886705619 | 0,298045465 |    |
| 408 | SDEESNDDS      | calsequestrin                                             | 0,828747957 | 0,298538145 |    |
| 409 | NVFSSPGGT      | Actin and myosin binding protein                          | 0,645597166 | 0,176711487 |    |
| 410 | RRASF          | pyruvate kinase                                           | 1,46049316  | 0,528001395 |    |
| 411 | AKGGTVKAA      | annexin IV                                                | 0,908075446 | 0,134163911 |    |
| 412 | DDEITQDEN      | muscarinic acetylcholine receptor M2                      | 0,768611827 | 0,181503979 |    |
| 413 | ETDDYAEII      | Focal adhesion kinase                                     | 0,775890769 | 0,272573071 |    |
| 414 | YTTNSPSKI      | transcriptional factor SWI7                               | 0,6411705   | 0,17998906  |    |
| 415 | SPLKSPYKI      | Retinoblastoma-associated protein                         | 0,875841818 | 0,05673343  | On |
| 416 | RKRTRKE        | Histone H2B                                               | 1,489305569 | 0,410876786 |    |
| 417 | RPPGFTPFR      |                                                           | 1,100054647 | 0,205980009 |    |
| 418 | SASGTPNKE      | caldesmon                                                 | 0,548542121 | 0,20898578  |    |
| 419 | NSVDTSSLS      | Glycogen [starch] synthase                                | 0,694629195 | 0,203436511 |    |
| 420 | LRANSI         | cystic fibrosis transmembrane conductance regulator       | 0,835963545 | 0,122103188 |    |
| 421 | SSSSPSRR       | Lamin B receptor                                          | 1,574157215 | 0,582500579 |    |
| 422 | TKSASFLKG      | nodulin-26                                                | 0,964757492 | 0,184410289 |    |
| 423 | VESLSSSEE      | Beta casein                                               | 0,929744226 | 0,333655994 |    |
| 424 | YRRNSVRFL      | Neutrophil cytosol factor 3                               | 1,965749763 | 0,649645392 |    |
| 425 | SPALTGDEA      | Insulin receptor substrate 4                              | 0,622714651 | 0,164473402 |    |
| 426 | RKQITVR        | Glycogen phosphorylase                                    | 2,045588608 | 0,920349323 |    |
| 427 | VHNRSKINL      | HMG-CoA reductase                                         | 0,944122856 | 0,05000729  | On |
| 428 | SPVHSIADE      | fructose-1,6-bisphosphatase                               | 0,664470772 | 0,17584669  |    |
| 429 | LRRASLGAF      | pyruvate kinase                                           | 1,850020353 | 0,911451497 |    |
| 430 | PRKGSPRKG      | Histone H2B.2                                             | 1,044150986 | 0,180282566 |    |
| 431 | SSPGSPGTP      | Microtubule-associated protein tau                        | 0,625639864 | 0,152284869 |    |
| 432 | TKAASEKKT      | myelin                                                    | 0,558198194 | 0,116856819 |    |
| 433 | LRRSSSVGY      | Acetylcholine receptor protein delta                      | 2,849507335 | 1,629883873 |    |
| 434 | PSEKSEEIT      | astrocytic phosphoprotein PEA-15                          | 0,661800874 | 0,11596501  |    |
| 435 | KAQEYFNIK      | Acetylcholine receptor protein delta                      | 0,673480261 | 0,132742418 |    |
| 436 | KRQSSTSNA      | phosphorylase b kinase beta                               | 1,147811023 | 0,081531383 | On |
| 437 | QKRPSQRSKYL    | Myelin basic protein                                      | 2,161149486 | 0,635508639 | On |
| 438 | QSPSSSPH       | phosphorylcholine transferase                             | 0,634172408 | 0,077747982 |    |
| 439 | KGHEYTNIK      | Protein-tyrosine phosphatase 2                            | 0,875293493 | 0,136042073 |    |
| 440 | KRRSSSYHV      | Sodium channel protein type II alpha                      | 3,752466015 | 1,536480091 |    |
| 441 | KAKQISVRGL     | Glycogen phosphorylase                                    | 1,937044756 | 0,815311638 |    |
| 442 | HSIYSSDDD      | Myb proto-oncogene protein                                | 0,696454982 | 0,505348086 |    |
| 443 | LVMQTAAGT      | myosin light chain kinase                                 | 0,693088713 | 0,247375086 |    |
| 444 | EEELYLEPL      | Tyrosine-protein kinase receptor                          | 0,996150754 | 0,443813642 |    |
| 445 | EQLSTSEEN      | Alpha-S2 casein                                           | 0,451020738 | 0,076255878 |    |
| 446 | IDMESQERI      | Transcription factor AP-1                                 | 0,527429161 | 0,07223238  |    |
| 447 | MILLSELSR      | eukaryotic translation initiation factor 4F               | 0,402185703 | 0,035011663 |    |

|     |                |                                                       |             |             |    |
|-----|----------------|-------------------------------------------------------|-------------|-------------|----|
| 448 | PYKFPSSPLRIPGZ |                                                       | 0,344522686 | 0,023402935 |    |
| 449 | GPAASAAA       | myristolated alanine-rich C-kinase substrate (MARCKS) | 0,480706632 | 0,119146752 |    |
| 450 | AQAASPAKG      | Protein tyrosine phosphatase 1B                       | 0,516359264 | 0,104294149 |    |
| 451 | DHSRSTKAA      | myelin                                                | 0,814156357 | 0,067428389 |    |
| 452 | FPFHSPSRL      | Alpha crystallin B                                    | 1,325289413 | 0,340634955 |    |
| 453 | GRILTLPRS      | Insulin Receptor (IR)                                 | 1,342933952 | 0,304142742 | On |
| 454 | EDVGSDEED      | Heat Shock Protein 90-beta                            | 0,802038885 | 0,269691288 |    |
| 455 | ENTVSTSLG      | muscarinic acetylcholine receptor M2                  | 0,388667578 | 0,062872898 |    |
| 456 | RRQHSYDTF      | glutamate (NMDA) receptor epsilon                     | 0,633139171 | 0,341382195 |    |
| 457 | SFMMTPYVV      | Stress-activated protein kinase JNK1                  | 0,417857603 | 0,038566672 |    |
| 458 | PGTESFVNA      | Beta-2 adrenergic receptor                            | 0,546758312 | 0,079720894 |    |
| 459 | SDEEV          | Troponin T                                            | 0,550992927 | 0,073188349 |    |
| 460 | APQTPGGRR      | Myelin basic protein                                  | 1,165455512 | 0,25558724  |    |
| 461 | DFPLSPPKK      | stathmin                                              | 0,514895481 | 0,166350959 |    |
| 462 | FKAFSPKGS      | Actin and myosin binding protein                      | 1,221830327 | 0,057557111 | On |
| 463 | RDSNYISKG      | platelet-derived growth factor receptor               | 0,644682131 | 0,294967709 |    |
| 464 | DDEESESD       | synaptic vesicle amine transporter                    | 1,185238473 | 0,306064476 |    |
| 465 | VKRISGL        | Histone H4                                            | 1,028638135 | 0,231747834 |    |
| 466 | RRKDYPALH      |                                                       | 0,715952283 | 0,180362071 |    |
| 467 | SEKKSGLG       | myelin                                                | 0,453553692 | 0,072158705 |    |
| 468 | PPSAYGSVK      | Annexin II                                            | 0,713751715 | 0,054139975 |    |
| 469 | RRFSV          | pyruvate kinase                                       | 1,633518147 | 0,132956671 | On |
| 470 | STRRSVRGS      | multidrug resistance protein 1                        | 3,092983254 | 0,785470248 | On |
| 471 | TQSTSGRRR      | cAMP response element-binding protein CRE-BP2         | 3,058009751 | 0,546112252 | On |
| 472 | VNELSKDIG      | Alpha-S1 casein                                       | 0,516485264 | 0,133384826 |    |
| 473 | RAGETRFTD      | elongation factor 3                                   | 0,382623016 | 0,08907151  |    |
| 474 | SPSPSFRWP      | phosphorylcholine transferase                         | 0,682428814 | 0,23347402  |    |
| 475 | RVSGSRR        | Lamin C                                               | 3,031696268 | 0,087379566 | On |
| 476 | VRLRSSVPG      | vimentin                                              | 1,134998074 | 0,292666164 |    |
| 477 | SRKLSDFGQ      | Phenylalanine-4-hydroxylase                           | 0,742382685 | 0,103763621 |    |
| 478 | LSGFSFKKN      | myristolated alanine-rich C-kinase substrate          | 1,19415927  | 0,142314251 | On |
| 479 | PSRRSRSRS      | Lamin B receptor                                      | 0,48232053  | 0,11579998  |    |
| 480 | STDYYREGP      | TrkC tyrosine kinase                                  | 1,091617402 | 0,467624559 |    |
| 481 | TPAISPSKR      | deoxyuridine 5'-triphosphate nucleotidohydrolase      | 1,408404158 | 0,136879142 | On |
| 482 | LVVASAGPT      | RNA polymerase alpha                                  | 0,484790919 | 0,06284871  |    |
| 483 | PVPEYINQS      | EGF Receptor                                          | 0,58557954  | 0,024114442 |    |
| 484 | KKAESPVKE      | neurofilament triplet M                               | 0,842978716 | 0,25603523  |    |
| 485 | KSLNYIDLD      | Insulin receptor substrate 5                          | 0,914723268 | 0,149057401 |    |
| 486 | KRKQISVRGL     | Glycogen phosphorylase                                | 2,01492262  | 0,570835542 | On |
| 487 | SRGDYMTMQ      | Insulin receptor substrate 6                          | 0,497902401 | 0,043246807 |    |
| 488 | KKKSGGEDD      | eukaryotic translation initiation factor 4F           | 0,729813289 | 0,165939618 |    |
| 489 | KTSPSSSPA      | phosphorylcholine transferase                         | 0,762497471 | 0,278803457 |    |
| 490 | PRRRSSFGI      | Acetylcholine receptor protein gamma                  | 0,58704354  | 0,096923148 |    |
| 491 | IGSVSEDNS      | acetyl-CoA carboxylase                                | 1,359909815 | 0,666596337 |    |
| 492 | NAPVSALGE      | Myb proto-oncogene protein                            | 0,400996028 | 0,040521886 |    |
| 493 | EETPYSYPT      | Paxillin                                              | 0,88671471  | 0,493780265 |    |
| 494 | ERSPSPSFR      | phosphorylcholine transferase                         | 0,858412762 | 0,305608271 |    |
| 495 | IRKYTMRRL      | Receptor tyrosine-protein kinase erbB-2               | 1,567590105 | 0,519267821 |    |
| 496 | NEEESYSY       | RNA polymerase alpha                                  | 1,62179159  | 1,216441255 |    |
| 497 | PYKFPSSPLRIPGZ |                                                       | 0,377831232 | 0,043496949 |    |
| 498 | GRRQSLIED      | Tyrosine 3-monooxygenase                              | 0,472780818 | 0,028835875 |    |
| 499 | ASATSSSGG      | Glycogen [starch] synthase                            | 0,390147392 | 0,006140103 |    |
| 500 | DLPMSPRTL      | Signal Transducer and Activator of Transcription 3    | 0,37430309  | 0,016179681 |    |
| 501 | GDLQSAEFH      | Cystatin                                              | 0,486260706 | 0,072912774 |    |
| 502 | GSEEMYNMD      | Insulin receptor substrate 3                          | 0,488473491 | 0,182059874 |    |
| 503 | EENTYDEYE      | Cortactin                                             | 0,566804703 | 0,116016546 |    |

|     |                |                                                           |             |             |    |
|-----|----------------|-----------------------------------------------------------|-------------|-------------|----|
| 504 | ERRKSHEAE      | stathmin                                                  | 0,700095022 | 0,239713712 |    |
| 505 | RRRVTSATR      | glial fibrillary acidic protein                           | 1,809070218 | 0,867347317 |    |
| 506 | SKDSSKRGR      | myelin                                                    | 1,613434734 | 0,639872018 |    |
| 507 | MSVEEV         | eukaryotic translation initiation factor 4E               | 0,42388595  | 0,069094645 |    |
| 508 | AALESEDED      | eukaryotic translation initiation factor 4F               | 0,728692463 | 0,02951733  |    |
| 509 | ARKSTRRSI      | pleckstrin                                                | 1,843241933 | 0,815307448 |    |
| 510 | DLFGSDDEE      | elongation factor 1-beta                                  | 0,827489121 | 0,351687958 |    |
| 511 | FRRLSISTE      | phosphorylase b kinase alpha                              | 0,509065377 | 0,0515876   |    |
| 512 | RGAISAEVY      | cAMP-dependent protein kinase (PKA)                       | 0,535681405 | 0,022278177 |    |
| 513 | RKISASEF       |                                                           | 0,605249552 | 0,342689109 |    |
| 514 | LHRASLG        | pyruvate kinase                                           | 0,649022137 | 0,018190902 |    |
| 515 | RRRPTPAML      | Dopamine- and cAMP-regulated neuronal phosphoprotein      | 1,093318213 | 0,299741531 |    |
| 516 | SGYSSPGSP      |                                                           | 0,481034758 | 0,094293335 |    |
| 517 | LGEFTP         | Calgranulin B                                             | 0,502333996 | 0,081402661 |    |
| 518 | RRLSSLRA       | 40S ribosomal protein S6                                  | 2,475402058 | 1,126138357 |    |
| 519 | TAESSQAE       | Neuromodulin                                              | 0,630480819 | 0,059087079 |    |
| 520 | TRRASFSAQ      | Regulatory protein ADR1                                   | 1,344768903 | 0,545104135 |    |
| 521 | VSRTSAVPT      | Desmin                                                    | 0,526550474 | 0,119973697 |    |
| 522 | REQLSTSEE      | Alpha-S2 casein                                           | 0,526403827 | 0,142256215 |    |
| 523 | LSYRGYSL       |                                                           | 0,444102763 | 0,018315132 |    |
| 524 | KASGSSP        |                                                           | 0,408642162 | 0,017334818 |    |
| 525 | VVGSLRGA       | Protein tyrosine phosphatase 1B                           | 0,957604736 | 0,288489803 |    |
| 526 | SRRPSYRKI      | cAMP response element binding protein                     | 1,180642512 | 0,417417608 |    |
| 527 | PEGDYEEVL      | Hematopoietic cell-specific LYN substrate                 | 1,336973502 | 1,010321297 |    |
| 528 | QEGDTDAGL      |                                                           | 0,59561393  | 0,042564597 |    |
| 529 | SVFSSPAS       | caldesmon                                                 | 0,335370376 | 0,099332278 |    |
| 530 | TRKISQTAQ      | ryanodine receptor                                        | 0,592616127 | 0,131233077 |    |
| 531 | PINGSPRTP      | Retinoblastoma-associated protein                         | 0,405738649 | 0,100438907 |    |
| 532 | KQISVRGL       | Glycogen phosphorylase                                    | 1,51716751  | 0,532165566 |    |
| 533 | KLINSIADT      | Serine/threonine-protein kinase STE7                      | 0,403122251 | 0,050341072 |    |
| 534 | LDDQYTSSS      | Tyrosine-protein kinase Tec                               | 0,963735141 | 0,49467074  |    |
| 535 | PYDNYVPSA      | platelet-derived growth factor receptor                   | 0,635692184 | 0,307278347 |    |
| 536 | SRQLSSGVS      | Heat Shock Protein 27                                     | 0,470744944 | 0,019646375 |    |
| 537 | KNIVTPRTP      | Myelin basic protein                                      | 1,43658889  | 0,535503517 |    |
| 538 | LKLASPELE      | Transcription factor AP-2                                 | 0,428495179 | 0,102576511 |    |
| 539 | QLIDSMANS      | mitogen-activated protein kinase kinase 1                 | 0,432785086 | 0,103817086 |    |
| 540 | IVYKSPVVS      |                                                           | 0,770277121 | 0,195257046 |    |
| 541 | NGYISAAEL      | Calmodulin                                                | 0,986291318 | 0,362898258 |    |
| 542 | EILNSPEKA      | 14-3-3 protein alpha/beta/delta/zeta                      | 0,438588234 | 0,044017766 |    |
| 543 | ESPESTEIT      | insulin-like growth factor binding protein 1              | 0,450383407 | 0,123243356 |    |
| 544 | KRPSHRAKA      | Myelin basic protein                                      | 1,425716312 | 0,312458523 | On |
| 545 | NNYVYIDPT      | Mast/stem cell growth factor receptor                     | 0,762440879 | 0,236512179 |    |
| 546 | PYKFPSSPLRIPGZ |                                                           | 0,336302852 | 0,027334964 |    |
| 547 | GSPRTPRRG      | Retinoblastoma-associated protein                         | 2,020264888 | 0,353587741 | On |
| 548 | DADEYLIPQ      | EGF Receptor                                              | 0,901131979 | 0,467842983 |    |
| 549 | DRLVSARSV      | Receptor tyrosine kinase for hepatocyte growth factor     | 0,733789549 | 0,211778943 |    |
| 550 | GGLTSPGLS      | Keratin 8                                                 | 0,382085433 | 0,131408144 |    |
| 551 | GTVPSDNID      | Beta-2 adrenergic receptor                                | 0,377218084 | 0,112397535 |    |
| 552 | EGSAYEEVP      | 1-phosphatidylinositol-4,5-bisphosphate phosphodiesterase | 0,801939255 | 0,267995865 |    |
| 553 | ESIISQETY      | Alpha-S2 casein                                           | 1,075461936 | 0,601325541 |    |
| 554 | RVRKSKGKY      | glutamate receptor 2                                      | 2,996797085 | 1,690282211 |    |
| 555 | SNDSTSVSA      | muscarinic acetylcholine receptor M2                      | 0,470073135 | 0,063428059 |    |
| 556 | RRPTVA         | Protein phosphatase inhibitor 2                           | 1,142811515 | 0,117858772 | On |
| 557 | AEPDYGALY      | 1-phosphatidylinositol-4,5-bisphosphate phosphodiesterase | 1,025013831 | 0,437182765 |    |
| 558 | AVASSPSKA      | myristolated alanine-rich C-kinase substrate (MARCKS)     | 0,394630197 | 0,078814078 |    |
| 559 | DPGTSYRTR      | pyruvate dehydrogenase E1                                 | 0,832223475 | 0,233346053 |    |

|     |                |                                                  |             |             |    |
|-----|----------------|--------------------------------------------------|-------------|-------------|----|
| 560 | GEGTYGVVY      | cell division control protein 2                  | 0,681375439 | 0,250438005 |    |
| 561 | RLRLSPSPT      | Lamin C                                          | 0,903569004 | 0,129166558 |    |
| 562 | RKASRKE        | Histone H2B                                      | 1,262046348 | 0,323861824 |    |
| 563 | LRRWSLG        | pyruvate kinase                                  | 0,939985794 | 0,049193833 | On |
| 564 | RRVTSATRR      | glial fibrillary acidic protein                  | 3,085264772 | 0,461120283 | On |
| 565 | SLQASIVTD      | guanine nucleotide-binding protein alpha         | 0,568478756 | 0,118509699 |    |
| 566 | RRATPA         | pyruvate kinase                                  | 1,176103074 | 0,076389878 | On |
| 567 | ADGIYAASG      | Tyrosine-protein kinase transforming protein Fes | 0,665622694 | 0,280033327 |    |
| 568 | TGDTYTAHA      | Tyrosine-protein kinase Dash/Abl                 | 0,412662943 | 0,07368755  |    |
| 569 | TVSKTETSQ      | Rhodopsin                                        | 0,406340898 | 0,075521171 |    |
| 570 | WTSDTQGDE      | 14-3-3 protein zeta                              | 0,777555664 | 0,121462699 |    |
| 571 | RKFSSARPE      | Sodium channel protein                           | 1,125615022 | 0,061563942 | On |
| 572 | KKKKASVA       | pyruvate kinase                                  | 1,366495461 | 0,646892085 |    |
| 573 | LRRASLG        | pyruvate kinase                                  | 1,29551043  | 0,348746613 |    |
| 574 | YKNDYYRKR      | Ros proto-oncogene tyrosine kinase               | 1,318118388 | 0,105329109 | On |
| 575 | SSEITTKDL      | Prothymosin                                      | 0,462747105 | 0,150790478 |    |
| 576 | PLSRTLVS       | glycogen synthase                                | 0,71880237  | 0,089954168 |    |
| 577 | LRRASLRG       | pyruvate kinase                                  | 2,281665826 | 0,686439645 | On |
| 578 | TEGQYELQP      | Tyrosine-protein kinase Blk                      | 0,823346411 | 0,307536172 |    |
| 579 | TSPSSPAS       | phosphorylcholine transferase                    | 0,352435692 | 0,02462449  |    |
| 580 | PPSAYGSVK      | Annexin II                                       | 0,645972226 | 0,149250898 |    |
| 581 | RTKRSGSV       | phosphorylase b kinase beta                      | 2,182077204 | 0,371477729 | On |
| 582 | KRFGSKAHM      | nitric-oxide synthase                            | 2,132450644 | 0,311357522 | On |
| 583 | LNDSEEEED      | E7 protein                                       | 0,761853497 | 0,187032874 |    |
| 584 | QRATSNVFA      | Myosin regulatory light chain 3                  | 0,578395543 | 0,079924079 |    |
| 585 | SRSRTPSLP      |                                                  | 1,617469176 | 0,410090868 | On |
| 586 | KRPSARAKA      | Myelin basic protein                             | 2,50776104  | 0,491484223 | On |
| 587 | LRAPSWIDT      | Alpha crystallin B                               | 0,671761093 | 0,129848652 |    |
| 588 | QRRTSVSGE      | cAMP-dependent protein kinase                    | 0,75847878  | 0,269002511 |    |
| 589 | HATPSPVVD      | Myb proto-oncogene protein                       | 0,527821378 | 0,101327167 |    |
| 590 | KRPSQRAKA      | Myelin basic protein                             | 1,386983838 | 0,496269811 |    |
| 591 | EDAESEDEE      | Nucleophosmin                                    | 0,568289164 | 0,129098623 |    |
| 592 | ENAEYLRVA      | EGF Receptor                                     | 0,71738516  | 0,156690385 |    |
| 593 | HKRKSSQAL      | Transforming protein erbA                        | 1,139260008 | 0,122811391 | On |
| 594 | LAYESHESL      | Matrix Gla-protein                               | 0,640738849 | 0,188289639 |    |
| 595 | PYKFPSSPLRIPGZ |                                                  | 0,646186521 | 0,02863305  |    |
| 596 | GGVDYKNIH      | Macrophage colony stimulating factor I receptor  | 0,633371427 | 0,13172542  |    |
| 597 | ALRPSTSRS      | vimentin                                         | 0,883988699 | 0,342812048 |    |
| 598 | DEAATKTQT      | myosin II heavy chain                            | 0,597230891 | 0,081794366 |    |
| 599 | FARKSTRRS      | pleckstrin                                       | 1,676305335 | 0,706595384 |    |
| 600 | GLGESRKDK      | myelin                                           | 0,640181356 | 0,09973373  |    |
| 601 | DTHRTPSRS      | Proto-oncogene tyrosine-protein kinase Src       | 0,885943946 | 0,238309917 |    |
| 602 | EKESSNDST      | muscarinic acetylcholine receptor M2             | 0,482851024 | 0,098392557 |    |
| 603 | RRAISGDLT      | dihydropyridine-sensitive calcium channel        | 0,629401959 | 0,045229145 |    |
| 604 | SAYRSVDEV      | 2-oxoisovalerate dehydrogenase alpha             | 0,71711841  | 0,107552846 |    |
| 605 | NTVSTSLGH      | muscarinic acetylcholine receptor M2             | 0,805130087 | 0,141575901 |    |
| 606 | RASLG          |                                                  | 0,810120965 | 0,154019665 |    |
| 607 | AKDASKRGR      | myelin                                           | 1,413161927 | 0,419277042 |    |
| 608 | DDEASTTVS      | Rhodopsin                                        | 0,615209503 | 0,132345627 |    |
| 609 | ETAESSQAE      | Neuromodulin                                     | 0,550276578 | 0,09589678  |    |
| 610 | YTRFSLARQ      | Transferrin receptor protein 1                   | 1,032263532 | 0,365378942 |    |
| 611 | SPKQSPSSS      | phosphorylcholine transferase                    | 0,599080738 | 0,126336791 |    |
| 612 | RKRSRKE        | Histone H2B                                      | 0,580410309 | 0,137337561 |    |
| 613 | RPPGFSPFR      |                                                  | 0,92454749  | 0,252327698 |    |
| 614 | SARVYENVG      | Protein-tyrosine phosphatase 3                   | 0,545880021 | 0,059877473 |    |
| 615 | NRSASEPSL      | RAF proto-oncogene ser/thr-protein kinase        | 0,392931839 | 0,082270205 |    |

|     |                |                                                           |             |             |    |
|-----|----------------|-----------------------------------------------------------|-------------|-------------|----|
| 616 | KGYSLG         | Lysozyme C                                                | 0,56484854  | 0,087190317 |    |
| 617 | SSSSSPKAE      | myristolated alanine-rich C-kinase substrate (MARCKS)     | 0,648266135 | 0,192254132 |    |
| 618 | TKKTSFVNF      | eukaryotic translation initiation factor 2 beta           | 1,497885348 | 0,734752128 |    |
| 619 | VEPLTPSGE      | EGF Receptor                                              | 0,507749863 | 0,070040166 |    |
| 620 | YRLPSNVQ       | Alpha crystallin A                                        | 0,559276408 | 0,055033593 |    |
| 621 | SPAISIHEI      | phosphorylase b kinase alpha                              | 0,462933319 | 0,093582755 |    |
| 622 | RKQISVR        | Glycogen phosphorylase                                    | 0,432618966 | 0,07088056  |    |
| 623 | VGWPTVRER      | Nef                                                       | 0,77075337  | 0,19433497  |    |
| 624 | QTYRSFHD       | cGMP-dependent protein kinase (PKG)                       | 0,957469925 | 0,241679503 |    |
| 625 | LRRASLGAA      | pyruvate kinase                                           | 1,768158016 | 0,650764252 |    |
| 626 | PRKGSPPRG      | Histone H2B.2                                             | 0,648110739 | 0,048298203 |    |
| 627 | SSPASLSRA      | phosphorylcholine transferase                             | 0,690456744 | 0,070883111 |    |
| 628 | TKAASEKKS      | myelin                                                    | 0,377509773 | 0,109163136 |    |
| 629 | LRRPSDQEV      | c-Rel proto-oncogene protein                              | 0,433014085 | 0,04377792  |    |
| 630 | PSAPSPQPK      | Tyrosine 3-monooxygenase                                  | 0,441920564 | 0,070817728 |    |
| 631 | KAKVTGRWK      | troponin T                                                | 2,521599072 | 1,190982583 |    |
| 632 | KRPTQRAKY      | Myelin basic protein                                      | 3,209308617 | 1,300320759 |    |
| 633 | PLSRTLVRSL     | Glycogen [starch] synthase                                | 1,205529516 | 0,539776945 |    |
| 634 | QSPGSPLEE      | Neutrophil cytosol factor 5                               | 0,543269532 | 0,098058257 |    |
| 635 | KGGYSQAA       | HLA class I histocompatibility antigen B7                 | 0,794289002 | 0,204702186 |    |
| 636 | KRRRSSKDT      | glutamate (NMDA) receptor subunit zeta 4                  | 1,401774226 | 0,331398735 | On |
| 637 | KAQISVRGL      | Glycogen phosphorylase                                    | 0,620867006 | 0,04418359  |    |
| 638 | HRTPSRSFG      | Proto-oncogene tyrosine-protein kinase Src                | 1,430054061 | 0,463997804 |    |
| 639 | LSGFSPKKN      | myristolated alanine-rich C-kinase substrate              | 1,045576208 | 0,351959218 |    |
| 640 | EEEEYMPME      | Middle T antigen                                          | 0,580294639 | 0,069255325 |    |
| 641 | EQFSTVKG       | G protein-coupled receptor kinase 6                       | 0,53752282  | 0,143707206 |    |
| 642 | IDKISRIGF      | glycine receptor alpha                                    | 0,396219048 | 0,069363062 |    |
| 643 | MHRQETVDA      | calcium/calmodulin-dependent protein kinase type II alpha | 0,422773435 | 0,064952066 |    |
| 644 | PYKFPSSPLRIPGZ |                                                           | 0,442967699 | 0,047834992 |    |
| 645 | GNHTYQEIA      | Paxillin                                                  | 0,544374115 | 0,04189309  |    |
| 646 | APVASPAAP      | synapsins IA and IB                                       | 0,596111202 | 0,112741649 |    |
| 647 | DGNNSEDES      | caldesmon                                                 | 0,546645584 | 0,061866424 |    |
| 648 | FMTEYVTR       | mitogen-activated protein kinase MSK7                     | 0,510947365 | 0,079904457 |    |
| 649 | GRGLSLSRF      | Myelin basic protein                                      | 1,112112941 | 0,316279381 |    |
| 650 | EDTLDSDDD      | N-myc proto-oncogene protein                              | 0,897622326 | 0,405275189 |    |
| 651 | ENQASEEED      | Dopamine- and cAMP-regulated neuronal phosphoprotein      | 0,449099261 | 0,100594863 |    |
| 652 | RRPTSPVSR      | Early E1A                                                 | 1,470609554 | 0,568990004 |    |
| 653 | SFMDSSGLG      | anti-sigma F factor antagonist                            | 0,563014405 | 0,070905273 |    |
| 654 | QKRPSQRSK      | Myelin basic protein                                      | 1,638582521 | 0,386081408 | On |
| 655 | SDEEH          | initiation factor 5A                                      | 0,490765493 | 0,038659382 |    |
| 656 | APLTPGGRR      | Myelin basic protein                                      | 1,189333618 | 0,287400426 |    |
| 657 | DEPSTPYHS      | Protein phosphatase inhibitor 2                           | 0,585216137 | 0,125547426 |    |
| 658 | FGSRSLYGL      | keratin, type II                                          | 0,594410467 | 0,018755763 |    |
| 659 | RDPVTENAV      | muscarinic acetylcholine receptor M2                      | 0,407345546 | 0,102696729 |    |
| 660 | AVRRSDRA       | Troponin I                                                | 0,999592844 | 0,177058824 |    |
| 661 | VKRGSG         | Histone H4                                                | 0,902891774 | 0,269021443 |    |
| 662 | RRKDTPALH      |                                                           | 0,736558034 | 0,201717373 |    |
| 663 | SEITTKDLK      | Prothymosin                                               | 0,450791661 | 0,02440903  |    |
| 664 | PNVSYIASR      | protein kinase shaggy                                     | 0,738967113 | 0,091375719 |    |
| 665 | RRDSV          | pyruvate kinase                                           | 0,791915474 | 0,032682609 | On |
| 666 | STRRSIRLP      | pleckstrin                                                | 2,191989476 | 1,150272998 |    |
| 667 | TPQVSDTMR      | glycogenin                                                | 0,488660833 | 0,056978834 |    |
| 668 | VNATYVNVK      | Receptor tyrosine kinase for hepatocyte growth factor     | 0,442584299 | 0,033303591 |    |
| 669 | RAAHSIKGG      | Chemotaxis protein cheA                                   | 1,060341224 | 0,335869771 |    |
| 670 | SPSLSRHSS      | Glycogen [starch] synthase                                | 1,172169275 | 0,488541982 |    |
| 671 | RTPPPSG        | Myelin basic protein                                      | 0,630339615 | 0,149473861 |    |



|     |                |                                                         |             |             |    |
|-----|----------------|---------------------------------------------------------|-------------|-------------|----|
| 672 | VRKRTLRL       | EGF Receptor                                            | 1,850762983 | 0,866431209 |    |
| 673 | SRKSGFGH       | gap junction beta-1 protein                             | 1,096717055 | 0,366214947 |    |
| 674 | LSGESDLEI      | DNA topoisomerase II                                    | 0,748170591 | 0,076105921 |    |
| 675 | PSQRSKYLA      | Myelin basic protein                                    | 0,527667708 | 0,034093064 |    |
| 676 | STDEYLDLS      | Receptor tyrosine kinase                                | 1,224832898 | 0,774421776 |    |
| 677 | TNHIYSNLA      | Mast/stem cell growth factor receptor                   | 0,694375972 | 0,064326231 |    |
| 678 | LSRHSSPHQ      | Glycogen [starch] synthase                              | 1,040269057 | 0,082446585 | On |
| 679 | PTRHSRVAE      | Lamin                                                   | 0,50041677  | 0,034221313 |    |
| 680 | KISITSRKA      | GTP-binding protein era                                 | 1,298362408 | 0,516761594 |    |
| 681 | KSKISASRK      | troponin I                                              | 1,975839203 | 1,039548358 |    |
| 682 | KRKQISVGGL     | Glycogen phosphorylase                                  | 0,757973196 | 0,223528412 |    |
| 683 | SRALSRQLS      | Heat Shock Protein 27                                   | 1,574529616 | 0,670541571 |    |
| 684 | KKKFSFKKP      | MARCKS-related protein                                  | 3,153902857 | 2,237059979 |    |
| 685 | KTRSSRAGL      | Histone H2A                                             | 2,069958553 | 0,867751093 |    |
| 686 | PAPGSPPEP      | Early E1A                                               | 0,454428716 | 0,044429658 |    |
| 687 | IGSESTEDQ      | Alpha-S1 casein                                         | 0,421516518 | 0,08778137  |    |
| 688 | MRRNSFTPL      | fructose-2,6-bisphosphatase                             | 0,636946606 | 0,172243815 |    |
| 689 | EEQEYVQTV      | Annexin I                                               | 0,594994935 | 0,111385005 |    |
| 690 | ERRVSNAGG      | vasodilator-stimulated phosphoprotein                   | 0,504556299 | 0,126778878 |    |
| 691 | IREESPPTS      | Glycoprotein IV                                         | 0,364726439 | 0,054719222 |    |
| 692 | NDSVYANWM      | Probable receptor with tyrosine-protein kinase activity | 0,661187551 | 0,121630622 |    |
| 693 | PYKFPSSPLRIPGZ |                                                         | 0,471967839 | 0,140604934 |    |
| 694 | GRRESLTSF      | inositol 1,4,5-trisphosphate-binding protein            | 0,93603492  | 0,413326378 |    |
| 695 | ARVFSVLRE      | Ser/Thr poetin phosphatase 2B                           | 0,927406749 | 0,244823267 |    |
| 696 | DLPLSPSAF      | tristetraproline                                        | 0,686686293 | 0,115472596 |    |
| 697 | GDKKSKKAK      | Na+/K+ ATPase 1                                         | 1,013831307 | 0,121856902 | On |
| 698 | GSDVSFNEE      | DNA topoisomerase II                                    | 0,657765581 | 0,256277462 |    |
| 699 | EEKGSPLNA      | Protein tyrosine phosphatase 1B                         | 0,442667571 | 0,164254971 |    |
| 700 | ERQKTQTKL      | myosin light chain kinase                               | 0,736338209 | 0,320274904 |    |
| 701 | RRRSSKDTS      | glutamate (NMDA) receptor subunit zeta 3                | 0,918238324 | 0,253418419 |    |
| 702 | SKAGSLGNI      |                                                         | 0,43477713  | 0,059609668 |    |
| 703 | MSGDEM         | eukaryotic translation initiation factor 2 beta         | 0,447914429 | 0,147899724 |    |
| 704 | AAATTPAAE      | neuromodulin                                            | 0,274776902 | 0,082215882 |    |
| 705 | ARKKSSAQL      | ras-related protein rap-1b                              | 0,803526102 | 0,574429785 |    |
| 706 | DKVTSPTKV      | caldesmon                                               | 0,534129998 | 0,214877258 |    |
| 707 | FRRFTPDSL      | Sodium channel protein                                  | 0,587515779 | 0,220099768 |    |
| 708 | RFTDTRKDE      | elongation factor 4                                     | 0,468548028 | 0,121051997 |    |
| 709 | RKISASEA       |                                                         | 0,536460201 | 0,138899139 |    |
| 710 | LARASLG        | pyruvate kinase                                         | 0,744626935 | 0,165708713 |    |
| 711 | RRRLSSLRA      | 40S ribosomal protein S6                                | 0,749188176 | 0,098780831 |    |
| 712 | SGYISSLEY      | Complement C1r                                          | 1,03740847  | 0,374086397 |    |
| 713 | LARNSI         | cystic fibrosis transmembrane conductance regulator     | 0,411921839 | 0,108250287 |    |
| 714 | TIAVG          | Photosystem Q(A)                                        | 0,460780274 | 0,198160916 |    |
| 715 | TADISEDEE      | phosphorylcholine transferase                           | 0,748578404 | 0,113452621 |    |
| 716 | TRQTSVSGQ      | synapsins IA and IB                                     | 0,44464935  | 0,05228079  |    |
| 717 | VSEEYDLDR      | Fibroblast growth factor receptor 4                     | 0,984745141 | 0,347730097 |    |
| 718 | REQESSGEE      | Protein phosphatase inhibitor 2                         | 0,458838521 | 0,033695625 |    |
| 719 | GTKRSGSV       | phosphorylase b kinase beta                             | 1,28938492  | 0,154449214 | On |
| 720 | NRLQTMKEE      | Lamin C                                                 | 0,562812194 | 0,245415424 |    |
| 721 | VVELSGESD      | DNA topoisomerase II                                    | 0,571944084 | 0,067060911 |    |
| 722 | SRRPSRATW      | Vitronectin                                             | 1,888776839 | 0,245618986 | On |
| 723 | PASQTPNKT      | Proto-oncogene tyrosine-protein kinase Src              | 0,456031801 | 0,066379188 |    |
| 724 | QDPVSPSLV      | muscarinic acetylcholine receptor M2                    | 0,438647994 | 0,051342184 |    |
| 725 | STTVSKTET      | Rhodopsin                                               | 0,451960361 | 0,060945075 |    |
| 726 | TRKISASEF      |                                                         | 0,47520654  | 0,078194631 |    |
| 727 | PGPQSPGSP      | Neutrophil cytosol factor 4                             | 0,348073168 | 0,097471561 |    |



|     |                |                                                         |             |             |    |
|-----|----------------|---------------------------------------------------------|-------------|-------------|----|
| 728 | KQGSGRGL       | Glycogen phosphorylase                                  | 1,51786679  | 0,422342917 |    |
| 729 | KKSWSRWTL      | parathyroid hormone/parathyroid hormone-related peptide | 2,501744004 | 0,788694132 | On |
| 730 | LASSSKEEN      | Cystatin S                                              | 0,523041868 | 0,144817852 |    |
| 731 | PLRRTLVA       | glycogen synthase                                       | 0,522725629 | 0,103616214 |    |
| 732 | SRPSSNRSY      | vimentin                                                | 1,7088832   | 0,390040804 | On |
| 733 | KNDYYRKRK      | Ros proto-oncogene tyrosine kinase                      | 1,450238439 | 0,303018837 | On |
| 734 | LIEDAEYTA      | Proto-oncogene tyrosine-protein kinase Lck, Fyn, Yes    | 0,662398919 | 0,162458546 |    |
| 735 | QKAQTERKS      | troponin T                                              | 0,966878447 | 0,20402247  |    |
| 736 | ISTESQPNG      | phosphorylase b kinase alpha                            | 0,388863253 | 0,139848866 |    |
| 737 | NGNNYVYID      | Mast/stem cell growth factor receptor                   | 0,517887206 | 0,094007574 |    |
| 738 | EIKKSWSRW      | parathyroid hormone/parathyroid hormone-related peptide | 0,819560026 | 0,154686138 |    |
| 739 | ESPASDEAE      | Nonhistone chromosomal protein HMG-14                   | 0,520723503 | 0,090599293 |    |
| 740 | KRKSSQALV      | Transforming protein erbA                               | 1,550853468 | 0,861636568 |    |
| 741 | NNMPSSDDG      | muscarinic acetylcholine receptor M2                    | 0,44741776  | 0,058146627 |    |
| 742 | PYKFPSSPLRIPGZ |                                                         | 0,411504077 | 0,091328999 |    |
| 743 | GSPGTPGSR      |                                                         | 0,68893971  | 0,169266407 |    |
| 744 | AVVRTPPKS      |                                                         | 1,299740478 | 0,122849557 | On |
| 745 | DRKLSTKEA      | multidrug resistance protein 2                          | 0,627193797 | 0,152255592 |    |
| 746 | GGIRSLNVA      | isocitrate dehydrogenase                                | 0,525634982 | 0,088484913 |    |
| 747 | GTRLRLARM      | glial fibrillary acidic protein                         | 1,102249522 | 0,182406952 | On |
| 748 | EGNKSPAPK      | Actin and myosin binding protein                        | 0,449923252 | 0,209087567 |    |
| 749 | ESHESMESY      | Matrix Gla-protein                                      | 0,532492665 | 0,178539456 |    |
| 750 | RVRISADAM      | Troponin I                                              | 0,450921512 | 0,178609529 |    |
| 751 | SNDDSDDDD      | casequestrin                                            | 0,73610261  | 0,143527314 |    |
| 752 | RRPTPA         | Protein phosphatase inhibitor 3                         | 1,239345313 | 0,099278486 | On |
| 753 | AEGSSNVFS      | Myosin regulatory light chain 2                         | 0,546572228 | 0,138038568 |    |
| 754 | AVADSESED      | cAMP-dependent protein kinase II (PKA)                  | 0,727960867 | 0,160192232 |    |
| 755 | DNPDYQQDF      | EGF Receptor                                            | 1,082050126 | 0,691254303 |    |
| 756 | GDVKYADIE      | platelet-derived growth factor receptor                 | 0,679944818 | 0,247443398 |    |
| 757 | RLQDYEEKT      | Connection of cytoskeletal structure to plasma membrane | 0,692503745 | 0,089635338 |    |
| 758 | FKKSFKL        | myristolated alanine-rich C-kinase substrate            | 1,852312358 | 1,128751727 |    |
| 759 | LRRPSLG        | pyruvate kinase                                         | 1,456687571 | 0,414569221 |    |
| 760 | RRVRSQEPG      | somatostatin receptor type 4                            | 0,865621221 | 0,043227045 | On |
| 761 | SLDDSGSAM      | alpha-1B adrenergic receptor                            | 0,50952434  | 0,130271286 |    |
| 762 | RRASVA         | pyruvate kinase                                         | 1,362435491 | 0,349278228 |    |
| 763 | ADDEYAPKQ      | Tyrosine-protein kinase Src64B                          | 0,714521401 | 0,314512778 |    |
| 764 | TESQYQQQP      | Tyrosine-protein kinase Hck                             | 0,533341896 | 0,145087537 |    |
| 765 | TVKSSKGGP      | Annexin I                                               | 0,861494862 | 0,264000165 |    |
| 766 | WTSDSAGEE      | 14-3-3 protein tau                                      | 0,844207221 | 0,196424222 |    |
| 767 | RKAASVIAK      | DNA polymerase beta                                     | 1,455079887 | 0,454695858 |    |
| 768 | LRRASLDG       | pyruvate kinase                                         | 0,668359335 | 0,111663762 |    |
| 769 | LRRASGG        | pyruvate kinase                                         | 0,971159018 | 0,107046798 | On |
| 770 | YHTTSHPGT      | Band 3 anion transport protein                          | 0,729242358 | 0,144512017 |    |
| 771 | SSEESITRI      | Beta casein                                             | 0,597079472 | 0,133714458 |    |
| 772 | PLAGSPVIA      | casein kinase II                                        | 0,687838753 | 0,10664235  |    |
| 773 | LGSPLRRL       | vimentin                                                | 3,894639769 | 1,203547262 | On |
| 774 | TEDQYSLVE      | PI3-kinase p85-alpha                                    | 1,51588683  | 0,791945012 |    |
| 775 | TRTYSLGSA      | vimentin                                                | 0,819024442 | 0,215671217 |    |
| 776 | PPSAYATVK      | Annexin II                                              | 0,835726103 | 0,202276019 |    |
| 777 | RTKRSGSV       | phosphorylase b kinase beta                             | 2,083612725 | 0,357877605 | On |
| 778 | KREASLDNQ      | Phytochrome A                                           | 0,436447791 | 0,079378327 |    |
| 779 | LMDKYHVDN      | Early E2A                                               | 0,579583618 | 0,180440817 |    |
| 780 | QQGMTVYGL      | calponin alpha and beta                                 | 0,866707602 | 0,181954266 |    |
| 781 | SRSRSRSRS      | Lamin B receptor                                        | 4,241327474 | 1,867484274 |    |
| 782 | KRNSSPPPS      |                                                         | 1,381837558 | 0,194856144 | On |
| 783 | LQRYSSDPT      | EGF Receptor                                            | 0,581345713 | 0,150979953 |    |

|     |                |                                                          |             |             |    |
|-----|----------------|----------------------------------------------------------|-------------|-------------|----|
| 784 | QRRTSLTGS      | Volt.-dep. L-type calcium channel alpha-1S               | 1,157531261 | 0,203901577 | On |
| 785 | GVRQSRASD      | T-cell surface glycoprotein CD3 gamma                    | 0,658076067 | 0,098174201 |    |
| 786 | KRPSNRAKA      | Myelin basic protein                                     | 1,652070866 | 0,154139628 | On |
| 787 | EAVTSPRFI      | Tyrosine 3-monooxygenase                                 | 0,654440274 | 0,170466061 |    |
| 788 | EMTGYVATR      | Mitogen-activated protein kinase p38                     | 0,486728835 | 0,160481024 |    |
| 789 | HKIKSGAEA      | DNA polymerase beta                                      | 0,709881438 | 0,112840103 |    |
| 790 | LARRSTTDA      | Choriogonadotropin beta                                  | 0,499316939 | 0,159719109 |    |
| 791 | PYKFPSSPLRIPGZ |                                                          | 0,439726346 | 0,041857517 |    |
| 792 | GGTGTPNKE      | Actin and myosin binding protein                         | 0,621534234 | 0,172876639 |    |
| 793 | ALGISYGRK      | TAT protein                                              | 1,81755976  | 0,18881458  | On |
| 794 | DDSGSAMSG      | alpha-1B adrenergic receptor                             | 0,523894363 | 0,09335556  |    |
| 795 | EYVQTVKSS      | Annexin I                                                | 0,551602821 | 0,1130895   |    |
| 796 | GKTDYMGEA      | Beta-2 adrenergic receptor                               | 0,68399581  | 0,151134562 |    |
| 797 | DSTYYKASK      | Focal adhesion kinase                                    | 1,056968159 | 0,145642448 | On |
| 798 | EKEISDDEA      | Heat Shock Protein 90-beta                               | 0,529352268 | 0,048954933 |    |
| 799 | RRADSLQKN      | iron-responsive element binding protein                  | 0,797032555 | 0,094203003 |    |
| 800 | SAYGSVKAY      | Annexin II                                               | 0,749314795 | 0,087668826 |    |
| 801 | NTSSSPQPK      | p53                                                      | 0,678571369 | 0,136826979 |    |
| 802 | GSRRR          | protamine                                                | 2,980015175 | 0,514583056 | On |
| 803 | AKAKTTKKR      | Myosin regulatory light chain 2                          | 3,014601165 | 0,188195953 | On |
| 804 | DDAYSDET       | Protein phosphatase inhibitor 2                          | 2,522000912 | 1,131722741 |    |
| 805 | ESVDYVPM       | platelet-derived growth factor receptor                  | 1,096889223 | 0,22704294  |    |
| 806 | YSTDYREG       | TrkC tyrosine kinase                                     | 1,485210044 | 0,718950484 |    |
| 807 | SPKKSPRKA      | Histone H4                                               | 2,060926025 | 0,168432662 | On |
| 808 | RKRSRKA        | Histone H2B                                              | 2,717833648 | 0,872622744 | On |
| 809 | RPPASPSQ       | synapsins IA and IB                                      | 0,726957295 | 0,252050971 |    |
| 810 | SARLSAKPA      | Nonhistone chromosomal protein HMG-14                    | 1,07811204  | 0,100186249 | On |
| 811 | NRQSSQARV      | Phytochrome A                                            | 1,575370759 | 0,088488325 | On |
| 812 | KEAKSD         | Nonhistone chromosomal protein HMG-14                    | 0,487486138 | 0,185249253 |    |
| 813 | SSSNTIRRP      | fructose-2,6-bisphosphatase                              | 2,341631211 | 0,930639879 |    |
| 814 | TKKQSFQKT      | cystic fibrosis transmembrane conductance regulator      | 1,251644129 | 0,068061649 | On |
| 815 | VDSAYEVIK      | L-lactate dehydrogenase M                                | 1,220205898 | 0,423019754 |    |
| 816 | YRKSSLKSR      | spermatid nuclear transition protein 3                   | 2,412507437 | 0,274220184 | On |
| 817 | SNVSSTGSI      |                                                          | 0,784144385 | 0,166820157 |    |
| 818 | RARSRKE        | Histone H2B                                              | 1,586575613 | 0,049201687 | On |
| 819 | VGPGYLGSG      | Probable receptor with tyrosine-protein kinase activity  | 0,524227737 | 0,148911586 |    |
| 820 | QTVKSSKGG      | Annexin I                                                | 1,01236382  | 0,116837626 | On |
| 821 | LRMFSEKAP      | Gamma-aminobutyric-acid receptor gamma-2                 | 1,304017602 | 0,052958877 | On |
| 822 | PRHLSNVSS      |                                                          | 0,647259016 | 0,159996153 |    |
| 823 | SSNEYMDMK      | Mast/stem cell growth factor receptor                    | 0,686143297 | 0,219903926 |    |
| 824 | THYGSLPQK      | Myelin basic protein                                     | 1,040608102 | 0,123133792 | On |
| 825 | LRRPSDQAV      | Transforming protein rel                                 | 0,746569992 | 0,006828956 | On |
| 826 | PRRNSRASL      | Sodium channel protein type II alpha                     | 0,598102417 | 0,108179762 |    |
| 827 | KAKTTKKRP      | Myosin regulatory light chain 2                          | 3,048942758 | 0,266652309 | On |
| 828 | KRPSGRAKA      | Myelin basic protein                                     | 2,742494625 | 0,091439342 | On |
| 829 | PLSKTSLVSSL    | Glycogen [starch] synthase                               | 0,858469594 | 0,169633974 |    |
| 830 | QSGMTEYVA      | Mitogen-activated protein kinase FUS3                    | 0,738167016 | 0,213342892 |    |
| 831 | KGATSDEED      | DNA topoisomerase II                                     | 0,630711113 | 0,1867175   |    |
| 832 | KRRNSEFEI      | tryptophan 5-monooxygenase                               | 1,084003246 | 0,109638467 | On |
| 833 | LTRRASFSAQ     | Regulatory protein ADR1                                  | 1,874733648 | 0,574913909 |    |
| 834 | HRQETVEAL      | calcium/calmodulin-dependent protein kinase type II beta | 0,333671951 | 0,02178774  |    |
| 835 | LRRFSLATM      | Cytochrome P450 2B1                                      | 0,906621726 | 0,153960802 |    |
| 836 | EEEAYGWMD      | Gastrin                                                  | 0,903365513 | 0,252332384 |    |
| 837 | EQESSGEED      | Protein phosphatase inhibitor 2                          | 0,602554125 | 0,044836351 |    |
| 838 | IAADSEAEQ      | Insulin receptor substrate 7                             | 0,502005515 | 0,089408271 |    |
| 839 | MGEASGAQL      | Beta-2 adrenergic receptor                               | 0,353817653 | 0,067084311 |    |

|     |                |                                                                |             |             |    |
|-----|----------------|----------------------------------------------------------------|-------------|-------------|----|
| 840 | PYKFPSSPLRIPGZ |                                                                | 0,348605419 | 0,082611524 |    |
| 841 | GNGDYMPMS      | Insulin receptor substrate 8                                   | 0,389872316 | 0,056905    |    |
| 842 | APRYPGGRR      | Myelin basic protein                                           | 1,953123733 | 0,356167341 | On |
| 843 | DGNKSPAPK      | caldesmon                                                      | 0,527322048 | 0,107625435 |    |
| 844 | FMTEYVATR      | mitogen-activated protein kinase                               | 0,449285641 | 0,070403189 |    |
| 845 | GRASSHSSQ      | Lamin C                                                        | 1,100066429 | 0,357274817 |    |
| 846 | EDSTYYKAS      | Focal adhesion kinase                                          | 0,915593174 | 0,407523375 |    |
| 847 | ENPQYFRQG      | TrkC tyrosine kinase                                           | 0,486348332 | 0,097740445 |    |
| 848 | RRPTPATVA      | Protein phosphatase inhibitor 4                                | 0,900781782 | 0,20698499  |    |
| 849 | SFKLSGFSF      | myristolated alanine-rich C-kinase substrate                   | 0,50863957  | 0,030398413 |    |
| 850 | QEKESERLA      | Beta-2 adrenergic receptor                                     | 0,419999291 | 0,053739764 |    |
| 851 | RRVSV          | pyruvate kinase                                                | 1,362795025 | 0,066092688 | On |
| 852 | APFTPGGRR      | Myelin basic protein                                           | 1,368431424 | 0,242827117 | On |
| 853 | DEKLSEILG      | RNA polymerase alpha                                           | 0,497118362 | 0,137270694 |    |
| 854 | FGHNTIDAV      | bumetanide-sensitive sodium-(potassium)-chloride cotransporter | 0,421619509 | 0,103626828 |    |
| 855 | RDEEYGYEA      | Gamma-aminobutyric-acid receptor gamma-2                       | 1,245878801 | 0,590596191 |    |
| 856 | AVRRSDAA       | Troponin I                                                     | 0,630326971 | 0,112399048 |    |
| 857 | TKRSGSV        | phosphorylase b kinase beta                                    | 0,935177732 | 0,053273682 | On |
| 858 | RRKATQVGE      | vasodilator-stimulated phosphoprotein                          | 0,429161323 | 0,107851566 |    |
| 859 | SEGDSSEGE      | Serum response factor                                          | 0,619410557 | 0,036958079 |    |
| 860 | PLDRSSHAQ      | Insulin Receptor (IR)                                          | 0,437636032 | 0,12666025  |    |
| 861 | RRASS          | pyruvate kinase                                                | 1,27840479  | 0,287905938 |    |
| 862 | STPLSPTRI      | Lamin A/C                                                      | 1,001972577 | 0,267512614 |    |
| 863 | TPPLSPSRR      | Myc proto-oncogene protein                                     | 1,828799282 | 0,497243052 | On |
| 864 | VKRISGLIY      | Histone H4                                                     | 0,882082381 | 0,163671812 |    |
| 865 | RAAASRARQ      | cAMP response element-binding protein CRE-BP3                  | 1,58158043  | 0,174276744 | On |
| 866 | SPRTPGGRR      | Myelin basic protein                                           | 2,054681014 | 0,451394042 | On |
| 867 | RRRRSVA        | pyruvate kinase                                                | 3,430662285 | 0,488454219 | On |
| 868 | VRFESIRLP      | Choriogonadotropin beta                                        | 0,84062004  | 0,174866864 |    |
| 869 | SRKESYSVY      | Histone H2B                                                    | 0,66656852  | 0,146039036 |    |
| 870 | LSELSRRRI      | eukaryotic translation initiation factor 4F                    | 2,70515441  | 0,395606074 | On |
| 871 | PSPSSRVTV      | Lamin B1                                                       | 0,929022913 | 0,161029101 |    |
| 872 | SSVPTPSPL      | casein kinase II                                               | 0,552081248 | 0,037110494 |    |
| 873 | TNEEYLDLS      | Fibroblast growth factor receptor 2                            | 0,808284192 | 0,185604713 |    |
| 874 | LSRFSWGAE      | Myelin basic protein                                           | 0,585141041 | 0,188125064 |    |
| 875 | PTKRSPTKR      | Histone H2B.1                                                  | 0,835829674 | 0,150929283 |    |
| 876 | KISASRKLQ      | troponin I                                                     | 2,222073851 | 0,406590731 | On |
| 877 | KSFGSPNRI      | cell division protein kinase 7                                 | 1,59157191  | 0,277680125 | On |
| 878 | KRKQISVAGL     | Glycogen phosphorylase                                         | 1,476686264 | 0,259965037 | On |
| 879 | SQHSTPPKK      | Large T antigen                                                | 0,661445361 | 0,147366056 |    |
| 880 | KKIDSFASN      | acetyl-CoA carboxylase                                         | 0,949518392 | 0,377530335 |    |
| 881 | KTETSQVAP      | Rhodopsin                                                      | 0,447294333 | 0,17388954  |    |
| 882 | PAAPSPGSS      | synapsins IA and IB                                            | 0,499844736 | 0,188377898 |    |
| 883 | IGRFSEPHA      | cGMP-dependent protein kinase (PKG)                            | 0,410532874 | 0,134952108 |    |
| 884 | MQLKSEIKQ      | phosphorylase b kinase alpha                                   | 0,624611653 | 0,06862203  |    |
| 885 | EEQEYIKTV      | Annexin I                                                      | 0,824796628 | 0,22080728  |    |
| 886 | ERRPSNVSQ      | Sodium channel protein type II alpha                           | 0,442830732 | 0,135823001 |    |
| 887 | IPHPTVRT       | Retinoblastoma-associated protein                              | 1,034875901 | 0,34447537  |    |
| 888 | NDSTSVSAV      | muscarinic acetylcholine receptor M2                           | 0,364924521 | 0,057320633 |    |
| 889 | PYKFPSSPLRIPGZ |                                                                | 0,305161698 | 0,089022357 |    |
| 890 | GRPITPPRN      | ser/thr protein phosphatase PP1-alpha                          | 1,211221964 | 0,343041666 |    |
| 891 | ARTKRSGSV      | phosphorylase b kinase beta                                    | 1,734089892 | 0,208401654 | On |
| 892 | DLPGETDFV      | Beta-2 adrenergic receptor                                     | 0,789387274 | 0,249303544 |    |
| 893 | GALYSGSEG      | Serum response factor                                          | 0,449240041 | 0,071197051 |    |
| 894 | GRVLTLP RS     | Insulin Receptor (IR)                                          | 1,315249821 | 0,348675498 |    |
| 895 | EKESSNDS       | muscarinic acetylcholine receptor M2                           | 0,411103482 | 0,105078555 |    |

|     |                |                                                          |             |             |    |
|-----|----------------|----------------------------------------------------------|-------------|-------------|----|
| 896 | ERNLSFEIK      | protein-tyrosine phosphatase G1                          | 0,593826998 | 0,165874137 |    |
| 897 | RRRRSRRAS      | Protamine Z                                              | 2,230453532 | 1,433511933 |    |
| 898 | SIYSSDDDE      | Myb proto-oncogene protein                               | 1,237916409 | 0,487834275 |    |
| 899 | HGYSLG         | Lysozyme C                                               | 0,463220368 | 0,119611422 |    |
| 900 | AAASFKAQR      |                                                          | 1,411824218 | 0,209236494 | On |
| 901 | ARKFSSARP      | Sodium channel protein                                   | 1,736157726 | 0,282876041 | On |
| 902 | DKEYYSVHN      | Receptor tyrosine kinase for hepatocyte growth factor    | 0,367337515 | 0,048282497 |    |
| 903 | FRKLSFTES      |                                                          | 0,661080051 | 0,110710485 |    |
| 904 | RFHKSSKDS      | myelin                                                   | 0,555113949 | 0,076954914 |    |
| 905 | RAKRSGSV       | phosphorylase b kinase beta                              | 1,902824696 | 0,220592746 | On |
| 906 | KSESSQK        | 40S ribosomal protein S6                                 | 0,736357705 | 0,203812887 |    |
| 907 | RRRLSDSNF      | synapsins                                                | 0,545613286 | 0,042873655 |    |
| 908 | SGKTSPSSS      | phosphorylcholine transferase                            | 0,47664197  | 0,023345515 |    |
| 909 | KSRRTI         | Interleukin-2 receptor alpha                             | 0,942094635 | 0,220561588 |    |
| 910 | TAILE          | Photosystem Q(B)                                         | 0,538663358 | 0,183188072 |    |
| 911 | SYPLSPLSD      | Cytosolic phospholipase A2                               | 0,829835589 | 0,272544064 |    |
| 912 | TRQASQAGP      | synapsins IA and IB                                      | 0,604506522 | 0,103822708 |    |
| 913 | VRVYTHEVV      | cell division control protein 2                          | 0,482171927 | 0,082955668 |    |
| 914 | RENEYMPMA      | Middle T antigen                                         | 0,479576043 | 0,021174957 |    |
| 915 | GRGLSLSR       | Myelin basic protein                                     | 1,905670647 | 0,145976992 | On |
| 916 | YIYGSFK        |                                                          | 0,796255023 | 0,232082302 |    |
| 917 | VTRSSAVRL      | vimentin                                                 | 1,56624819  | 0,057446475 | On |
| 918 | SRRLSQETG      | cystic fibrosis transmembrane conductance regulator      | 0,659720931 | 0,164054853 |    |
| 919 | PASPSPQRQ      | synapsins IA and IB                                      | 0,586415439 | 0,143514479 |    |
| 920 | PWRITDNEL      | bumetanide-sensitive sodium-(potassium)-chloride cotran: | 0,467618002 | 0,176527964 |    |
| 921 | STSVSAVAS      | muscarinic acetylcholine receptor M2                     | 0,520445912 | 0,079163421 |    |
| 922 | TRIPSAKKY      | astrocytic phosphoprotein PEA-15                         | 1,334271304 | 0,145176945 | On |
| 923 | PGGSTPVSS      | casein kinase II                                         | 0,485129195 | 0,107421899 |    |
| 924 | QGTLKIFK       | Myelin basic protein                                     | 1,511134502 | 0,407349864 |    |
| 925 | KKRLSVERI      | DNA topoisomerase II alpha                               | 1,812496215 | 0,424978093 | On |
| 926 | KYRKSSLKS      | spermatid nuclear transition protein 4                   | 1,809362994 | 0,308428318 | On |
| 927 | PLSRRLSVA      | glycogen synthase                                        | 0,83446479  | 0,327173608 |    |
| 928 | SRLHSVRER      | sucrose synthase 2                                       | 1,708673561 | 0,27995878  | On |
| 929 | KNDKSKTWQ      | eukaryotic translation initiation factor 4E              | 0,985416644 | 0,355306246 |    |
| 930 | LGGGTFDIS      | Heat Shock Protein 70                                    | 0,635755232 | 0,171179191 |    |
| 931 | QHLKSVMLQ      | Troponin I                                               | 0,701087949 | 0,146429776 |    |
| 932 | ISQESSEEE      | high mobility group protein                              | 0,487498989 | 0,0763806   |    |
| 933 | NGDASPAAA      | myristolated alanine-rich C-kinase substrate (MARCKS)    | 0,400290549 | 0,153412025 |    |
| 934 | EHVSSSEES      | Alpha-S2 casein                                          | 0,48062082  | 0,158430413 |    |
| 935 | ESMESYEVS      | Matrix Gla-protein                                       | 0,918789621 | 0,284111389 |    |
| 936 | KQLASFEIY      | Cystatin S                                               | 0,5656836   | 0,174313923 |    |
| 937 | NMPSSDDGL      | muscarinic acetylcholine receptor M2                     | 0,50908345  | 0,133740975 |    |
| 938 | PYKFPSSPLRIPGZ |                                                          | 0,503327979 | 0,131970006 |    |
| 939 | GSLKSRKRA      | spermatid nuclear transition protein 1                   | 1,879554873 | 0,527103989 | On |
| 940 | AVRRSDRAY      | Troponin I                                               | 1,075391817 | 0,214573921 |    |
| 941 | DPTMSKSKK      | eukaryotic translation initiation factor 2 beta          | 0,975010508 | 0,272078103 |    |
| 942 | GGGTSPVFP      | Desmin                                                   | 0,538911423 | 0,198536758 |    |
| 943 | GSTSTPAPS      | ATP-citrate (pro-S-) lyase                               | 0,411443336 | 0,167531941 |    |
| 944 | EGGRTVGAG      | Elongation factor Tu-A and B                             | 0,406575739 | 0,129448692 |    |
| 945 | ESHESLESY      | Matrix Gla-protein                                       | 0,802962287 | 0,255550149 |    |
| 946 | RVLESFRAA      | voltage-gated potassium channel                          | 0,848257166 | 0,225849214 |    |
| 947 | SMANSFVGT      | mitogen-activated protein kinase kinase 1                | 0,450330612 | 0,117181758 |    |
| 948 | RRPSPA         | pyruvate kinase                                          | 1,323590182 | 0,042908453 | On |
| 949 | ADSFSLNDA      | galectin-3                                               | 0,842655242 | 0,333231045 |    |
| 950 | ATSASPPQK      | p53                                                      | 0,771324518 | 0,174278588 |    |
| 951 | DNLYYWDQD      | Receptor tyrosine-protein kinase erbB-2                  | 0,985048846 | 0,413049621 |    |

|      |               |                                                 |             |             |    |
|------|---------------|-------------------------------------------------|-------------|-------------|----|
| 952  | GDSSYKNIH     | macrophage colony stimulating factor 1 receptor | 0,530124429 | 0,161365595 |    |
| 953  | RKRLSQDAY     | Neutrophil cytosol factor 6                     | 0,440370414 | 0,117683963 |    |
| 954  | ASGSFKL       | Histone H1.1                                    | 0,497462517 | 0,177383121 |    |
| 955  | LRRGSLG       | pyruvate kinase                                 | 1,382032567 | 0,214380971 | On |
| 956  | RRSVSEAAL     | hormone sensitive lipase                        | 0,521906424 | 0,154720754 |    |
| 957  | SLAMSPRQR     | Protein phosphatase inhibitor 5                 | 0,769182916 | 0,151340426 |    |
| 958  | RRASLG        |                                                 | 1,39252669  | 0,389814995 |    |
| 959  | AAVDTSEI      | Prothymosin                                     | 0,839104198 | 0,234845162 |    |
| 960  | TESQSLTLT     | Beta casein                                     | 0,552757904 | 0,049718572 |    |
| 961  | TTRVTPLRT     | Desmin                                          | 1,53351763  | 0,286322948 | On |
| 962  | WTADSGEGD     | Fibrinogen alpha                                | 0,927240148 | 0,139723789 |    |
| 963  | RHRDTGILD     | Myelin basic protein                            | 0,589469261 | 0,17256417  |    |
| 964  | NRIYTHQVV     | cell division protein kinase 7                  | 1,216308027 | 0,203239867 | On |
| 965  | LRKASLG       | pyruvate kinase                                 | 0,676922799 | 0,10633447  |    |
| 966  | YHGHSMSDP     | pyruvate dehydrogenase E1                       | 0,472550288 | 0,196697893 |    |
| 967  | SSEESIISQ     | Alpha-S2 casein                                 | 0,762083206 | 0,147132092 |    |
| 968  | PKRGSKGKD     | Myelin basic protein                            | 0,756766581 | 0,158717425 |    |
| 969  | LGSALRRR      | vimentin                                        | 5,027038537 | 0,633201819 | On |
| 970  | TDESDNEI      | lower matrix phosphoprotein                     | 1,316686178 | 0,40583385  |    |
| 971  | TRSVSSSSY     | vimentin                                        | 1,040065435 | 0,067861383 | On |
| 972  | PPRRSSIRN     | Neutrophil cytosol factor 7                     | 2,835491271 | 0,780305435 | On |
| 973  | RTKGSQSV      | phosphorylase b kinase beta                     | 1,462650948 | 0,101292566 | On |
| 974  | KRAASPRKS     | Histone H5                                      | 2,460686896 | 0,184271336 | On |
| 975  | LMAPSEEDH     | insulin-like growth factor binding protein 2    | 0,553889029 | 0,156057315 |    |
| 976  | QNPVYHNQP     | EGF Receptor                                    | 0,894925313 | 0,053713529 | On |
| 977  | SRSRSRSPG     | Lamin B receptor                                | 3,636814242 | 1,342574022 | On |
| 978  | KRKVSSAEG     | Nonhistone chromosomal protein HMG-14           | 1,370506135 | 0,196787259 | On |
| 979  | LQDDYEDMM     | Band 3 anion transport protein                  | 1,102623697 | 0,334438993 |    |
| 980  | QRRSSEGST     | Volt.-dep. L-type calcium channel alpha-1S      | 0,615134209 | 0,203739811 |    |
| 981  | GVLRRASVA     | pyruvate kinase                                 | 1,650224999 | 0,353334981 | On |
| 982  | KRPSLRAKA     | Myelin basic protein                            | 2,263018753 | 0,215210097 | On |
| 983  | EASTTVSKT     | Rhodopsin                                       | 0,75100953  | 0,175924077 |    |
| 984  | ELSNYIAMG     | Insulin receptor substrate 9                    | 0,562380463 | 0,140699086 |    |
| 985  | HHHATPSPP     | Myb proto-oncogene protein                      | 0,736593438 | 0,10621435  |    |
| 986  | KTETSQVAP     | Rhodopsin                                       | 0,597509269 | 0,049463154 |    |
| 987  | PYKFPSSPLIPGZ |                                                 | 0,559983502 | 0,039624793 |    |
| 988  | GGSVTKKRK     | Lamin C                                         | 2,301604596 | 0,236645674 | On |
| 989  | AKRISGKMA     | cell division control protein 2                 | 1,619817687 | 0,13193433  | On |
| 990  | DDPSYVNVQ     | Adaptor molecule SHC                            | 0,884034919 | 0,12645809  |    |
| 991  | EVEKSPVKS     | neurofilament triplet M                         | 0,770167221 | 0,13438559  |    |
| 992  | GKSSSYSKQ     | Fibrinogen alpha                                | 1,205079309 | 0,162287836 | On |
| 993  | DSRSSLIRK     | multidrug resistance protein 3                  | 1,243261147 | 0,182604226 | On |
| 994  | EKAKSPVPK     | neurofilament triplet M                         | 0,988148474 | 0,213600288 |    |
| 995  | RQRKSRTTI     | Interleukin-2 receptor alpha                    | 2,084776705 | 0,125548899 | On |
| 996  | SAYATVKAY     | Annexin II                                      | 0,820132684 | 0,068567039 |    |
| 997  | NTDGSTDYG     | Lysozyme C                                      | 1,816099116 | 0,610298529 |    |
| 998  | KRTLRL        | EGF Receptor                                    | 2,04158727  | 0,094322451 | On |
| 999  | AGPTSARDG     | RNA polymerase alpha                            | 0,516359369 | 0,163203038 |    |
| 1000 | DAPDPELL      | Tyrosine-protein kinase Dash/Abl                | 0,651018241 | 0,218621115 |    |
| 1001 | ESSYSYEEI     | RNA polymerase alpha                            | 1,121562146 | 0,54220084  |    |
| 1002 | YSLGSALRP     | vimentin                                        | 0,888594568 | 0,250648818 |    |
| 1003 | SPHQSEDEE     | Glycogen [starch] synthase                      | 0,798659632 | 0,173335096 |    |
| 1004 | RKRRAE        | Histone H2B                                     | 1,447431503 | 0,115962533 | On |
| 1005 | RNASTNDSP     | Beta-2 adrenergic receptor                      | 0,728320045 | 0,120625524 |    |
| 1006 | SAELYSNAL     | platelet-derived growth factor receptor         | 0,782245412 | 0,273259183 |    |
| 1007 | NRQLSSGVS     | Heat Shock Protein 28                           | 0,687382123 | 0,187155419 |    |



|      |                |                                                           |             |             |    |
|------|----------------|-----------------------------------------------------------|-------------|-------------|----|
| 1008 | VGPDS          | p53                                                       | 0,586671489 | 0,116310101 |    |
| 1009 | SSSESGAPE      | Clathrin light chain B                                    | 0,711212918 | 0,162302935 |    |
| 1010 | TKHIYNLA       | Mast/stem cell growth factor receptor                     | 0,618192922 | 0,185394044 |    |
| 1011 | VDEMYREAP      | Myosin regulatory light chain 4                           | 0,684123945 | 0,347777188 |    |
| 1012 | YRKGLSKSR      | spermatid nuclear transition protein 1                    | 0,799639291 | 0,193308857 |    |
| 1013 | SNQEYLDLS      | Receptor tyrosine kinase                                  | 0,942061952 | 0,364595644 |    |
| 1014 | RKISASE        | cGMP-specific phosphodiesterase 3a                        | 0,751779386 | 0,16721409  |    |
| 1015 | VGFMTYVA       | mitogen-activated protein kinase 1                        | 0,686842147 | 0,233951859 |    |
| 1016 | QTASSPLSP      | Lamin                                                     | 0,652223093 | 0,146186895 |    |
| 1017 | LRKVKQEE       | vasodilator-stimulated phosphoprotein                     | 1,018314235 | 0,256306594 |    |
| 1018 | PQRATSNVF      | Myosin regulatory light chain 6                           | 0,692755192 | 0,148017127 |    |
| 1019 | SSNDSTSVS      | muscarinic acetylcholine receptor M2                      | 0,765553892 | 0,235397525 |    |
| 1020 | THVASVSDV      | acetyl-CoA carboxylase                                    | 0,670910976 | 0,128969177 |    |
| 1021 | LRLSTKYR       | protein-tyrosine phosphatase G1                           | 2,083369461 | 0,406961046 | On |
| 1022 | PRRDSTEGF      | fructose-1,6-bisphosphatase                               | 0,810112019 | 0,104475242 |    |
| 1023 | KAEEYILKK      | Acetylcholine receptor protein gamma                      | 0,759629353 | 0,284940714 |    |
| 1024 | KRPSFRAKA      | Myelin basic protein                                      | 2,997855974 | 0,105868486 | On |
| 1025 | PTPSAPSPQPKG   | Tyrosine 3-monooxygenase                                  | 0,738273071 | 0,242611904 |    |
| 1026 | QRYSSDPTG      | EGF Receptor                                              | 0,657205364 | 0,111391566 |    |
| 1027 | KEDTYTAHA      | Tyrosine-protein kinase abl-1                             | 0,750456369 | 0,17869476  |    |
| 1028 | KRRLSFSET      | Interleukin-1 alpha                                       | 1,439496275 | 0,398292904 |    |
| 1029 | KRAKAKTTKRR    | Myosin regulatory light chain 2                           | 4,002420976 | 0,47598155  | On |
| 1030 | HRQETVDAL      | calcium/calmodulin-dependent protein kinase type II alpha | 0,496265047 | 0,104137103 |    |
| 1031 | LNRMSFASN      | acetyl-CoA carboxylase                                    | 0,65941784  | 0,063233412 |    |
| 1032 | EEDTYTMPS      | Focal adhesion kinase                                     | 0,759427107 | 0,093577728 |    |
| 1033 | EQEYEDPD       | Band 3 anion transport protein                            | 0,752401331 | 0,203710504 |    |
| 1034 | HVSSSEESI      | Alpha-S2 casein                                           | 0,476346453 | 0,182245746 |    |
| 1035 | METPSQRRR      | Lamin C                                                   | 0,736309866 | 0,342771922 |    |
| 1036 | PYKFPSSPLRIPGZ |                                                           | 0,530561179 | 0,197290129 |    |
| 1037 | GNFNYVEFT      | Myosin regulatory light chain 2                           | 0,882951594 | 0,330745714 |    |
| 1038 | APRTPGGRR      | Myelin basic protein                                      | 2,165442916 | 0,135939024 | On |
| 1039 | DGNGYISAA      | Calmodulin                                                | 0,686529819 | 0,144836201 |    |
| 1040 | FLTEYVATR      | extracellular signal-regulated kinase 2                   | 0,573234879 | 0,146465335 |    |
| 1041 | GRALSTRAQ      | Troponin I                                                | 1,338661664 | 0,140681112 | On |
| 1042 | EDRMSLVNS      | Cystatin S                                                | 0,498075256 | 0,195228475 |    |
| 1043 | ENPEYLGLD      | Receptor tyrosine-protein kinase erbB-2                   | 0,849969389 | 0,353432572 |    |
| 1044 | RRLSSLRAS      | 40S ribosomal protein S6                                  | 1,745826336 | 0,363740273 | On |
| 1045 | SFKKSFKLS      | myristolated alanine-rich C-kinase substrate (MARCKS)     | 2,068264145 | 1,14534628  |    |
| 1046 | PSKKYAIKG      | Glutamyl aminopeptidase                                   | 0,580126941 | 0,059962382 |    |
| 1047 | RRPSV          | pyruvate kinase                                           | 1,238273507 | 0,060588481 | On |
| 1048 | APETPGGRR      | Myelin basic protein                                      | 0,913813099 | 0,185564085 |    |
| 1049 | DEEMSETAD      | Protein phosphatase inhibitor 2                           | 0,607882076 | 0,151857381 |    |
| 1050 | FFSSSESGA      | Clathrin light chain B                                    | 0,645795058 | 0,271939146 |    |
| 1051 | RDDTYTAHA      | Tyrosine-protein kinase Dash/Abl                          | 0,544095862 | 0,224964251 |    |
| 1052 | APTPGGRR       | Myelin basic protein                                      | 1,232708234 | 0,421387591 |    |
| 1053 | STNDSPL        | Beta-2 adrenergic receptor                                | 0,576364376 | 0,18394132  |    |
| 1054 | RRKASGPPV      | Histone H1.1                                              | 1,050522298 | 0,167627176 | On |
| 1055 | SEENSKKTV      | Alpha-S2 casein                                           | 0,668661172 | 0,12136238  |    |
| 1056 | PASPSPQRQ      | synapsins IA and IB                                       | 0,693684389 | 0,163520442 |    |
| 1057 | RRASR          | pyruvate kinase                                           | 2,138452206 | 0,284058725 | On |
| 1058 | STNEYMDMK      | Mast/stem cell growth factor receptor                     | 0,658088256 | 0,164177797 |    |
| 1059 | TPPLSPIDM      | Transcription factor AP-5                                 | 0,558611549 | 0,154208566 |    |
| 1060 | VKGATSDEE      | DNA topoisomerase II                                      | 0,541466827 | 0,180091299 |    |
| 1061 | QRATSNVFA      | Myosin regulatory light chain 5                           | 0,607096982 | 0,115114195 |    |
| 1062 | SPRKSPRKS      | Histone H6                                                | 2,101696651 | 0,27747126  | On |
| 1063 | RRRASVA        | pyruvate kinase                                           | 1,618667052 | 0,377284148 | On |



|      |                |                                                         |             |              |    |
|------|----------------|---------------------------------------------------------|-------------|--------------|----|
| 1064 | VTPSPGLP       | casein kinase II                                        | 0,590530713 | 0,080231761  |    |
| 1065 | SRKDSLDD       | alpha-1B adrenergic receptor                            | 0,712680366 | 0,188652707  |    |
| 1066 | LSEHSSPEE      | Dopamine- and cAMP-regulated neuronal phosphoprotein    | 0,530932343 | 0,199088421  |    |
| 1067 | PSPKYPGPQ      | Chromogranin A                                          | 0,517024408 | 0,22694308   |    |
| 1068 | SSVLYTAVQ      | platelet-derived growth factor receptor                 | 0,576307515 | 0,131593275  |    |
| 1069 | TLSDSDD        | N-myc proto-oncogene protein                            | 0,929138647 | 0,246540347  |    |
| 1070 | LSLDSQGRN      | Beta-2 adrenergic receptor                              | 0,626994436 | 0,113625372  |    |
| 1071 | PTKRSPQKG      | Histone H2B.1                                           | 0,565055525 | 0,174269379  |    |
| 1072 | KIQASFRGH      | neurogranin                                             | 2,262752517 | 0,303389447  | On |
| 1073 | KRSNSVDTS      | Glycogen [starch] synthase                              | 0,979078112 | 0,34398924   |    |
| 1074 | KRKQISGRGL     | Glycogen phosphorylase                                  | 0,894144042 | 0,157352244  |    |
| 1075 | SQESSEEEQ      | high mobility group protein                             | 0,615091977 | 0,122395625  |    |
| 1076 | KKDVTVPKA      | Histone H1                                              | 1,394441784 | 0,361395294  |    |
| 1077 | KSRWSGSQQ      | RAF proto-oncogene ser/thr-protein kinase               | 1,449885201 | 0,28989765   | On |
| 1078 | LYSGSEGDS      | Serum response factor                                   | 0,849293985 | 0,281417957  |    |
| 1079 | IGHHSTSD       | 2-oxoisovalerate dehydrogenase alpha                    | 0,577580913 | 0,205078359  |    |
| 1080 | MPGETPPLS      | Transcription factor AP-3                               | 0,612642445 | 0,185465031  |    |
| 1081 | EETVYEAEP      | Hematopoietic cell-specific LYN substrate               | 1,153204803 | 0,375570704  |    |
| 1082 | ERRNSILTE      | cystic fibrosis transmembrane conductance regulator     | 0,706699579 | 0,245693143  |    |
| 1083 | INETSQHHD      | vimentin                                                | 0,543352797 | 0,108961837  |    |
| 1084 | NDSNYVVKG      | Mast/stem cell growth factor receptor                   | 0,505164853 | 0,150678472  |    |
| 1085 | PYKFPSSPLRIPGZ |                                                         | 0,481784842 | 0,21197639   |    |
| 1086 | GRNASTNDS      | Beta-2 adrenergic receptor                              | 0,541866465 | 0,272324288  |    |
| 1087 | ARSGSSTYS      | parathyroid hormone/parathyroid hormone-related peptide | 1,133982173 | 0,130798463  | On |
| 1088 | DLTSPDVG       | Transcription factor AP-4                               | 0,642704488 | 0,157170338  |    |
| 1089 | GAGNSLRTA      | Lamin C                                                 | 0,79477239  | 0,1746275    |    |
| 1090 | GRTWTLAGT      | cGMP-dependent protein kinase (PKG)                     | 0,662058188 | 0,190671848  |    |
| 1091 | EEHVYSFPN      | Paxillin                                                | 0,539569662 | 0,181218613  |    |
| 1092 | ERHHSIDAQ      | phosphoenolpyruvate carboxylase                         | 0,60726685  | 0,161886854  |    |
| 1093 | RRRRAASVA      | pyruvate kinase                                         | 2,505629075 | 0,192401729  | On |
| 1094 | SIRDTPAKN      | Nucleophosmin                                           | 0,640560286 | 0,204211239  |    |
| 1095 | GGYSLG         | Lysozyme C                                              | 0,626336559 | 0,208602681  |    |
| 1096 | AAASFKAKK      |                                                         | 1,234933348 | 0,309979567  |    |
| 1097 | ARDIYKNDY      | Ros proto-oncogene tyrosine kinase                      | 0,64779595  | 0,253581316  |    |
| 1098 | DKEVSDDEA      | HSP90-alpha                                             | 0,646346631 | 0,149415094  |    |
| 1099 | FRKFTKSER      | cGMP-dependent protein kinase (PKG)                     | 1,814809189 | 0,38314465   | On |
| 1100 | RFFGSDRGA      | Myelin basic protein                                    | 1,131657914 | 0,150343829  | On |
| 1101 | PRTPGGRR       | Myelin basic protein                                    | 0,866960256 | 0,037733485  | On |
| 1102 | KRRVSEV        | Erythrodihydroneopterin triphosphate synthetase         | 0,952048337 | 0,522576778  |    |
| 1103 | RRRGSSIPQ      | 6-phosphofructo-2-kinase/fructose-2,6-bisphosphatase    | 1,191308171 | 0,093183005  | On |
| 1104 | SGDTPRHL       | Microtubule-associated protein tau                      | 0,541046921 | 0,1111138724 |    |
| 1105 | KQITVR         | Glycogen phosphorylase                                  | 1,379862339 | 0,480386461  |    |
| 1106 | SSKRA          | Myosin regulatory light chain 2                         | 1,461128056 | 0,397377965  |    |
| 1107 | SVSSSYRR       | vimentin                                                | 2,628605807 | 0,541244437  | On |
| 1108 | TRQASISGP      | synapsins                                               | 0,883007534 | 0,089032795  | On |
| 1109 | VRTYTHEVV      | Cell division protein kinase 2                          | 0,719646391 | 0,121606594  |    |
| 1110 | REILSRRPS      | cAMP response element binding protein                   | 2,226624298 | 0,664734792  | On |
| 1111 | GASGSFKL       | Histone H1.1                                            | 0,723486581 | 0,028988648  |    |
| 1112 | VRRSDRA        | Troponin I                                              | 1,092839721 | 0,080172772  | On |
| 1113 | VTRRTLSDM      | 6-phosphofructokinase                                   | 1,179916651 | 0,179601864  | On |
| 1114 | SRRGSESE       | phosphoprotein phosphatase 1, 3a                        | 0,942980357 | 0,114077251  | On |
| 1115 | PASAYGSVK      | Annexin II                                              | 0,691082003 | 0,136503244  |    |
| 1116 | PWQVSLRTR      | Plasminogen                                             | 0,615572398 | 0,097768381  |    |
| 1117 | STSRSLYSS      | vimentin                                                | 1,492322401 | 0,459995595  |    |
| 1118 | TRGGSLERS      | alpha-1B adrenergic receptor                            | 0,790464617 | 0,11916075   |    |
| 1119 | PFKLSGLSF      | MARCKS-related protein                                  | 0,491477375 | 0,085631977  |    |

|      |                |                                                       |             |             |    |
|------|----------------|-------------------------------------------------------|-------------|-------------|----|
| 1120 | QEQEYVQAV      | Annexin I                                             | 0,566774346 | 0,177390675 |    |
| 1121 | KKRFSFKKS      | myristolated alanine-rich C-kinase substrate (MARCKS) | 3,249163503 | 0,659850115 | On |
| 1122 | KYLASASTM      | Myelin basic protein                                  | 0,874052944 | 0,182282723 |    |
| 1123 | PRRVSRRRR      | Protamine YII                                         | 0,573563469 | 0,138541636 |    |
| 1124 | SRKRSGEAT      | 6-phosphofructokinase                                 | 0,655773182 | 0,048585694 |    |
| 1125 | KMKDSDSEE      | Calmodulin                                            | 0,492976234 | 0,155915372 |    |
| 1126 | LFRLSEHSS      | Dopamine- and cAMP-regulated neuronal phosphoprotein  | 0,465695842 | 0,120310497 |    |
| 1127 | QDENTVSTS      | muscarinic acetylcholine receptor M2                  | 0,516877787 | 0,109067134 |    |
| 1128 | ISITSRKAQ      | GTP-binding protein era                               | 0,786772386 | 0,166612391 |    |
| 1129 | NFLKTSAGS      | Carbon catabolite derepressing protein kinase         | 0,573822528 | 0,159332203 |    |
| 1130 | EHIPYTHMN      | Insulin Receptor (IR)                                 | 0,694344777 | 0,196975143 |    |
| 1131 | ESMESYELN      | Matrix Gla-protein                                    | 1,087157901 | 0,138076316 | On |
| 1132 | KKRFSFKKS      | myristolated alanine-rich C-kinase substrate (MARCKS) | 4,089246603 | 2,697219813 |    |
| 1133 | NKQGYKARQ      | Protein kinase C delta                                | 1,247246664 | 0,225089587 | On |
| 1134 | PYKFPSSPLRIPGZ |                                                       | 0,610486078 | 0,20794053  |    |
| 1135 | GSQTSSRPS      | vimentin                                              | 0,760646594 | 0,117813583 |    |
| 1136 | AVMVSHYIH      | Prolactin                                             | 1,261146152 | 0,245901182 | On |
| 1137 | DPPGTESFV      | Beta-2 adrenergic receptor                            | 0,892191285 | 0,215013645 |    |
| 1138 | GFKRSYEEH      | Insulin Receptor (IR)                                 | 0,725028857 | 0,240344848 |    |
| 1139 | GSRRRRRRY      | protamine                                             | 2,794933727 | 1,312760185 |    |
| 1140 | EFPLSPPKK      | stathmin                                              | 0,8141203   | 0,2377651   |    |
| 1141 | ESEKTKTKE      | myosin II heavy chain                                 | 0,626184511 | 0,2057729   |    |
| 1142 | RSSMSGLHL      | acetyl-CoA carboxylase                                | 0,887032709 | 0,153350681 |    |
| 1143 | SLVNSRAQE      | Cystatin S                                            | 0,5706386   | 0,100462434 |    |
| 1144 | RRATVA         | pyruvate kinase                                       | 1,408687277 | 0,158772608 | On |
| 1145 | ADSFSLHDA      | galectin-3                                            | 0,776473873 | 0,181704515 |    |
| 1146 | ATRRSYVSS      | glial fibrillary acidic protein                       | 1,66022607  | 0,212824906 | On |
| 1147 | DNIDSQGRN      | Beta-2 adrenergic receptor                            | 0,556991249 | 0,153749752 |    |
| 1148 | GDSSEGEES      | Serum response factor                                 | 0,814400881 | 0,127356939 |    |
| 1149 | RKRKSSQAL      | Thyroid hormone receptor alpha                        | 1,367384327 | 0,289155464 | On |
| 1150 | AKRSRKE        | Histone H2B                                           | 1,071178994 | 0,319703231 |    |
| 1151 | LRRATLG        | pyruvate kinase                                       | 1,618649224 | 0,264807284 | On |
| 1152 | RRSSSVGYI      | Acetylcholine receptor protein delta                  | 1,612511317 | 0,282122661 | On |
| 1153 | SKVTSKAGS      |                                                       | 1,018802841 | 0,182561032 |    |
| 1154 | RGYSLG         | Lysozyme C                                            | 0,937244515 | 0,155038964 |    |
| 1155 | AARTPGGRR      | Myelin basic protein                                  | 1,760275541 | 0,145903112 | On |
| 1156 | TEPQYQPGE      | Proto-oncogene tyrosine-protein kinase Fyn            | 0,596872132 | 0,060419423 |    |
| 1157 | TTRRSASKT      | Fibrinogen alpha                                      | 1,627838896 | 0,125713648 | On |
| 1158 | WLTKTPEGN      | Actin and myosin binding protein                      | 0,641842726 | 0,131318956 |    |
| 1159 | RGRSSVYSA      | myosin heavy chain                                    | 1,0113088   | 0,523037898 |    |
| 1160 | RKRTLRRRL      | EGF Receptor                                          | 2,125060727 | 0,23480531  | On |
| 1161 | LRHASLG        | pyruvate kinase                                       | 0,697698557 | 0,161731552 |    |
| 1162 | YNGYSSNS       | Beta-2 adrenergic receptor                            | 0,813484889 | 0,099366417 |    |
| 1163 | SRTPSLPTP      | Microtubule-associated protein tau                    | 0,592708468 | 0,098198127 |    |
| 1164 | PKKGSKKAV      | Histone H2B                                           | 0,746602519 | 0,100651355 |    |
| 1165 | LELSDDDD       | Myosin heavy chain, nonmuscle type B                  | 0,747317575 | 0,283943769 |    |
| 1166 | TDDGYMPMS      | Insulin receptor substrate 10                         | 0,718205695 | 0,138611896 |    |
| 1167 | TRRLTGFLP      | Glycogen phosphorylase                                | 1,221362948 | 0,216630439 | On |
| 1168 | PPEKTEEEE      | somatostatin receptor type 5                          | 0,683621207 | 0,146590089 |    |
| 1169 | RTGRSGSV       | phosphorylase b kinase beta                           | 2,255280579 | 0,674305071 | On |
| 1170 | KQSPSSSPT      | phosphorylcholine transferase                         | 0,679011873 | 0,184880052 |    |
| 1171 | LLRPSRRVR      | somatostatin receptor type 6                          | 2,462024836 | 1,104070137 |    |
| 1172 | QMALTPVVV      | cell division protein kinase 4                        | 0,64341554  | 0,110113916 |    |
| 1173 | SRSRSPGRP      | Lamin B receptor                                      | 2,72883091  | 0,748781168 | On |
| 1174 | KRKRSRKES      | Histone H2B                                           | 2,563166764 | 1,008132272 |    |
| 1175 | LQAISPKQS      | phosphorylcholine transferase                         | 0,839994658 | 0,264034625 |    |

|      |           |                                            |             |             |  |
|------|-----------|--------------------------------------------|-------------|-------------|--|
| 1176 | QRRRSLEPP | Proto-oncogene tyrosine-protein kinase Src | 0,683627518 | 0,105162622 |  |
|------|-----------|--------------------------------------------|-------------|-------------|--|

**Suppl. Table 2. Average densitometry values for all substrates on the arrays for ST-HSC and their Markov test of significance.**

| Peptide # | Sequence       | Source protein                                          | $\sum(x_1, x_2, \dots, x_9)/n$ | $\sigma(x_1, x_2, \dots, x_9)$ | Markov state |
|-----------|----------------|---------------------------------------------------------|--------------------------------|--------------------------------|--------------|
| 1         | HEYIYDPM       | platelet-derived growth factor receptor                 | 0,856907                       | 0,285544208                    |              |
| 2         | KRPSVRAKA      | Myelin basic protein                                    | 1,775715448                    | 0,317791881                    | On           |
| 3         | EDNEYTARQ      | Tyrosine-protein kinase transforming protein SRC        | 0,738135754                    | 0,301614699                    |              |
| 4         | ENKLYGMSD      | Probable receptor with tyrosine-protein kinase activity | 0,425969923                    | 0,074611084                    |              |
| 5         | HRLLTLDPV      | Interleukin-1 receptor                                  | 0,578388917                    | 0,273326623                    |              |
| 6         | LEKKYVRRD      | macrophage colony stimulating factor 1 receptor         | 0,507493074                    | 0,124838415                    |              |
| 7         | PYKFPSSPLRIPGZ |                                                         | 0,575277424                    | 0,140976264                    |              |
| 8         | GKRQTEREK      | Troponin T                                              | 0,639104102                    | 0,128352936                    |              |
| 9         | APATSPKAE      | neuromodulin (GAP43)                                    | 0,557779929                    | 0,134344916                    |              |
| 10        | DEESEQGA       | tubulin                                                 | 0,630375928                    | 0,186532553                    |              |
| 11        | FFRRSKIAV      | glutamate receptor 2                                    | 0,864973469                    | 0,247871286                    |              |
| 12        | GMTEYVATR      | Mitogen-activated protein kinase FUS3                   | 0,666490598                    | 0,09767715                     |              |
| 13        | EAALYKNLL      | Mast/stem cell growth factor receptor                   | 0,536384444                    | 0,195986651                    |              |
| 14        | ELILSPRSK      | stathmin                                                | 0,781675077                    | 0,109646387                    |              |
| 15        | RRAVSEQDA      | Tyrosine 3-monooxygenase                                | 0,378408852                    | 0,148724329                    |              |
| 16        | SEDNSEDEI      | acetyl-CoA carboxylase                                  | 0,816319182                    | 0,294116943                    |              |
| 17        | PASLSRAKA      | phosphorylcholine transferase                           | 0,963307752                    | 0,089795285                    | On           |
| 18        | RRASL          | pyruvate kinase                                         | 1,481220651                    | 0,243445216                    | On           |
| 19        | AKKMSTYNV      | myosin heavy chain                                      | 1,380593036                    | 0,658117882                    |              |
| 20        | DDINSYEAW      | Coagulation factor IX                                   | 1,067159691                    | 0,397497253                    |              |
| 21        | ETRFDTDRK      | elongation factor 2                                     | 0,818429007                    | 0,124089792                    |              |
| 22        | QLSTSEENS      | Alpha-S2 casein                                         | 0,380017338                    | 0,093884165                    |              |
| 23        | SPRKSPKKS      | Histone H1                                              | 1,453682315                    | 0,020898541                    | On           |
| 24        | RRKASGP        | Histone H1.1                                            | 1,181219092                    | 0,115070801                    | On           |
| 25        | RQLRSPRRT      | ras-related protein Rab-4A                              | 1,986064042                    | 0,319398247                    | On           |
| 26        | SAVASNMRD      | muscarinic acetylcholine receptor M2                    | 0,62385417                     | 0,137639273                    |              |
| 27        | RTPPPSG        | Myelin basic protein                                    | 0,663251855                    | 0,220355864                    |              |
| 28        | LRRAS          | Red cell/liver pyruvate kinase                          | 1,193168639                    | 0,161006959                    | On           |
| 29        | SSTGSIDMV      | Microtubule-associated protein tau                      | 0,454213591                    | 0,065423139                    |              |
| 30        | TLASSFKRR      | glutamate (NMDA) receptor subunit zeta 1                | 1,916651997                    | 0,281497301                    | On           |
| 31        | VGAFSTVKG      | rhodopsin kinase                                        | 0,907531339                    | 0,282787749                    |              |
| 32        | YSGHMSMDP      | pyruvate dehydrogenase E1                               | 0,564963858                    | 0,212187469                    |              |
| 33        | SPGEYVNI       | Insulin receptor substrate 1                            | 0,636836903                    | 0,25747562                     |              |
| 34        | RKRSAKE        | Histone H2B                                             | 1,316087486                    | 0,260480872                    | On           |
| 35        | VINETSQHH      | vimentin                                                | 0,535345363                    | 0,229901243                    |              |
| 36        | SPVVSGDTS      | Microtubule-associated protein tau                      | 0,476206979                    | 0,107073334                    |              |
| 37        | LRRFSLATM      | Cytochrome P450 2B1                                     | 1,534354169                    | 0,100946616                    | On           |
| 38        | PRPASVPPS      | Glycogen [starch] synthase                              | 0,695991683                    | 0,148863003                    |              |
| 39        | SSRPSSNRS      | vimentin                                                | 1,312824406                    | 0,205948771                    | On           |
| 40        | TKFASDDEH      | Lupus La protein                                        | 0,558773967                    | 0,24726636                     |              |
| 41        | LSDDSFIED      | DNA topoisomerase II                                    | 1,033953489                    | 0,279702728                    |              |
| 42        | PSPKTPPGS      | Microtubule-associated protein tau                      | 0,693371328                    | 0,387723739                    |              |
| 43        | KDIGSESTE      | Alpha-S1 casein                                         | 0,554194299                    | 0,127273243                    |              |
| 44        | KRRGSVPIL      | erythrocyte protein 4.2                                 | 2,155586862                    | 0,167456471                    | On           |
| 45        | KRAKAKAKKR     | Myosin regulatory light chain 2                         | 3,284997745                    | 0,944286708                    | On           |
| 46        | QSYSSQRV       | Desmin                                                  | 0,625564565                    | 0,183467684                    |              |
| 47        | KGTGYIKTE      | Signal Transducer and Activator of Transcription 1      | 0,94123329                     | 0,273119185                    |              |
| 48        | KRSLSEMEI      | Serum response factor                                   | 0,677858485                    | 0,292703934                    |              |
| 49        | KRKQGSVRGL     | Glycogen phosphorylase                                  | 1,914350273                    | 0,079542758                    | On           |
| 50        | HTRDSEAQR      | erythrocyte band 7                                      | 0,508022171                    | 0,063949044                    |              |
| 51        | MAEVSWKVL      | Phosphorylase b kinase beta                             | 0,536956181                    | 0,187542201                    |              |
| 52        | EEGISQESS      | high mobility group protein                             | 0,540617325                    | 0,145722776                    |              |
| 53        | EQQQTEDEL      | Beta casein                                             | 0,546423464                    | 0,140624819                    |              |
| 54        | IGEGTYGVV      | Cell division protein kinase 2                          | 0,559018983                    | 0,130238846                    |              |
| 55        | MMPYVVTR       | Stress-activated protein kinase JNK1                    | 0,724574229                    | 0,087549162                    |              |

|     |                |                                                         |             |             |    |
|-----|----------------|---------------------------------------------------------|-------------|-------------|----|
| 56  | PYKFPSSPLRIPGZ |                                                         | 0,6773066   | 0,155403401 |    |
| 57  | GQEVYVKKT      | PTK receptor for angiotensin 1 (TEK)                    | 0,636782179 | 0,145300091 |    |
| 58  | AQETSGEEI      | insulin-like growth factor binding protein 1            | 0,413620074 | 0,114499648 |    |
| 59  | DKAKSRPSL      | fructose-1,6-bisphosphatase                             | 0,7731299   | 0,053537557 |    |
| 60  | FPVSYSSSG      | Probable receptor with tyrosine-protein kinase activity | 0,620792266 | 0,140086665 |    |
| 61  | GRLSSMAMI      | myosin light chain kinase                               | 0,588656429 | 0,092704755 |    |
| 62  | EEDLSDENI      | transcription factor BAF1                               | 0,658727718 | 0,078328367 |    |
| 63  | EPGPYAQPS      | Proto-oncogene C-crk                                    | 0,630863698 | 0,0832615   |    |
| 64  | RRRASQLKV      | Gamma-aminobutyric-acid receptor beta                   | 0,686514124 | 0,076356606 |    |
| 65  | SGADYPDEL      | Trypsin I                                               | 0,781965398 | 0,084527733 |    |
| 66  | KQISVR         | Glycogen phosphorylase                                  | 1,568078354 | 0,705315242 |    |
| 67  | SLKDH          | L-lactate dehydrogenase M                               | 0,531727753 | 0,117021179 |    |
| 68  | APRTAGGRR      | Myelin basic protein                                    | 1,866883479 | 0,581890235 |    |
| 69  | DGHEYIYVD      | platelet-derived growth factor receptor                 | 0,621508229 | 0,092984751 |    |
| 70  | FKRSYEEHI      | Insulin Receptor (IR)                                   | 0,682343303 | 0,057565446 |    |
| 71  | REARSRAST      | cAMP-dependent protein kinase II (PKA)                  | 1,153257846 | 0,165131167 | On |
| 72  | DRVYVHPF       | Angiotensinogen                                         | 0,62162999  | 0,192649884 |    |
| 73  | VRRSDAA        | Troponin I                                              | 0,536955395 | 0,121995308 |    |
| 74  | RRKMSRGLP      | Volt.-dep. L-type calcium channel alpha-1S              | 0,872601614 | 0,201014157 |    |
| 75  | SEVPYREVQ      | Tyrosine-protein kinase Src64B (hom MAP3K10)            | 0,614373603 | 0,087426152 |    |
| 76  | PRRASATSS      | Glycogen [starch] synthase                              | 0,943610807 | 0,194153571 |    |
| 77  | RRLSI          | phosphorylase b kinase alpha                            | 1,444173355 | 0,502462015 |    |
| 78  | STLSLSPFYL     | Alpha crystallin B                                      | 0,666266609 | 0,214220804 |    |
| 79  | TRDIYETDY      | Insulin Receptor (IR)                                   | 1,203512686 | 0,510722172 |    |
| 80  | VPTLSTFRT      | Desmin                                                  | 0,70834714  | 0,075446864 |    |
| 81  | RASTSKSES      | 40S ribosomal protein S6                                | 0,569589573 | 0,130063465 |    |
| 82  | SPSSSPTHE      | phosphorylcholine transferase                           | 0,549908709 | 0,096831966 |    |
| 83  | STNDSL         | Beta-2 adrenergic receptor                              | 0,52108088  | 0,099927862 |    |
| 84  | VRTFTHEVV      | Cell division protein kinase 2                          | 0,579807559 | 0,178293686 |    |
| 85  | SRKMSVQEY      | phosducin                                               | 0,709781804 | 0,251499252 |    |
| 86  | LSGLSFKRN      | MARCKS-related protein                                  | 1,577882809 | 0,442257407 |    |
| 87  | PTGTTQQRK      | Kinesin-related motor protein Eg5                       | 0,562111031 | 0,107549286 |    |
| 88  | STLASSFKR      | glutamate (NMDA) receptor subunit zeta 2                | 1,267232046 | 0,38161223  |    |
| 89  | TPPKSPSSA      | Microtubule-associated protein tau                      | 0,494876883 | 0,092855872 |    |
| 90  | PAAVSEHGD      | Na+/K+ ATPase 1                                         | 0,5069906   | 0,095866991 |    |
| 91  | PVSPSLVQG      | muscarinic acetylcholine receptor M2                    | 0,527413653 | 0,038291393 |    |
| 92  | KKDASDDLD      | eukaryotic translation initiation factor 2 beta         | 0,745971654 | 0,281333886 |    |
| 93  | KSRPSLPLP      | fructose-1,6-bisphosphatase                             | 1,28304071  | 0,288669901 |    |
| 94  | LSVSSLPGL      | Glycogen [starch] synthase                              | 0,579807638 | 0,115080132 |    |
| 95  | SRHSSPHQS      | Glycogen [starch] synthase                              | 0,593231518 | 0,112864066 |    |
| 96  | KKPPTPPPE      | Large T antigen                                         | 0,871428925 | 0,415135055 |    |
| 97  | KVPQTPLHT      | MAP kinase-activated protein kinase 2                   | 1,190929971 | 0,474523815 |    |
| 98  | PRRSSIRNA      | Neutrophil cytosol factor 1, p47-PHOX                   | 0,640122728 | 0,120036626 |    |
| 99  | ILDTTGQEE      | K-Ras                                                   | 0,714562113 | 0,103682656 |    |
| 100 | NDSNYIVKG      | Macrophage colony stimulating factor I receptor         | 0,614808485 | 0,106152668 |    |
| 101 | EFLRTSAGS      | 5'-AMP-activated protein kinase                         | 0,396636227 | 0,028775138 |    |
| 102 | ERTNSLPPV      | Volt.-dep. L-type calcium channel alpha-1S              | 0,477626336 | 0,04961254  |    |
| 103 | IRRASTIEM      | Cardiac phospholamban                                   | 0,748581075 | 0,049432576 |    |
| 104 | NFDDYMKSL      | Fatty acid-binding protein                              | 0,716099654 | 0,049417524 |    |
| 105 | PYKFPSSPLRIPGZ |                                                         | 0,66123646  | 0,077472254 |    |
| 106 | GRTGRRNSI      |                                                         | 2,741120693 | 0,389304724 | On |
| 107 | ATPIYLDIL      | TrkC tyrosine kinase                                    | 0,934478823 | 0,171600856 |    |
| 108 | DMRQTVAVG      | elongation factor 1-alpha 1                             | 0,49962506  | 0,039418418 |    |
| 109 | GDRFTDEEV      | Myosin regulatory light chain 2                         | 0,887551953 | 0,133802713 |    |
| 110 | GSGSSVTSR      | Desmin                                                  | 0,738851004 | 0,148200633 |    |
| 111 | EEPQYEEIP      | Middle T antigen                                        | 1,087673649 | 0,166048968 | On |



|     |                |                                                         |             |             |    |
|-----|----------------|---------------------------------------------------------|-------------|-------------|----|
| 112 | ERRLSLVPD      | cystic fibrosis transmembrane conductance regulator     | 0,843561038 | 0,332640102 |    |
| 113 | RRSSSRPIR      | Protamine YI                                            | 2,246508294 | 0,086060938 | On |
| 114 | SKIGSTENL      | Microtubule-associated protein tau                      | 0,518961868 | 0,021266222 |    |
| 115 | NDMTSL         | Tropomyosin 1 alpha                                     | 0,444094648 | 0,001471733 |    |
| 116 | AARLSLTDP      | platelet glycoprotein IB                                | 0,398162817 | 0,037020398 |    |
| 117 | ARRSTTDAG      | Choriogonadotropin beta                                 | 0,509773662 | 0,058085954 |    |
| 118 | DLKDTKYKL      | myosin II heavy chain                                   | 0,489459885 | 0,119743053 |    |
| 119 | GAFSTVKGV      | rhodopsin kinase                                        | 0,839632375 | 0,245284861 |    |
| 120 | RGRASSHSS      | Lamin A/C                                               | 1,200860987 | 0,265241109 |    |
| 121 | RKRSRAEF       | Histone H2B                                             | 0,826407925 | 0,015038505 | On |
| 122 | LRAASLG        | Red cell/liver pyruvate kinase                          | 0,750955164 | 0,027695185 | On |
| 123 | RRRQSVLNL      | cystic fibrosis transmembrane conductance regulator     | 1,245364692 | 0,243726868 | On |
| 124 | SIDEYFSEQ      | Interferon receptor                                     | 0,8698722   | 0,111154809 |    |
| 125 | EESESD         | synaptic vesicle amine transporter                      | 0,892690124 | 0,019596164 | On |
| 126 | RRRS           | Troponin I                                              | 2,2321826   | 0,381069379 | On |
| 127 | TAYGTRRHL      | calponin alpha and beta                                 | 1,750436144 | 0,219037649 | On |
| 128 | TRRISQTSQ      | ryanodine receptor                                      | 1,076612435 | 0,070621762 | On |
| 129 | VTPRTPPPS      | Myelin basic protein                                    | 0,550934473 | 0,048742061 |    |
| 130 | REVSSLKSK      | myosin heavy chain                                      | 0,830035542 | 0,073879634 |    |
| 131 | PEETQTQD       | HSP90-alpha                                             | 0,747496668 | 0,101235144 |    |
| 132 | KKQISVR        | Glycogen phosphorylase                                  | 1,776027465 | 0,258814882 | On |
| 133 | WLTKSPDGN      | caldesmon                                               | 0,627292814 | 0,102013663 |    |
| 134 | SRRSSLGSL      | Volt.-dep. L-type calcium channel alpha-1S              | 1,960141684 | 0,405949892 | On |
| 135 | PETVYEVAG      | Cortactin                                               | 1,129704115 | 0,389020923 |    |
| 136 | QEPGSGPPE      | somatostatin receptor type 3                            | 0,407197482 | 0,029826944 |    |
| 137 | SVSSSPIKE      | transcriptional factor SWI5                             | 0,427125391 | 0,069743992 |    |
| 138 | TRLHSLRER      | Sucrose synthase 1                                      | 1,542937063 | 0,275859642 | On |
| 139 | PKEVYDVML      | TrkC tyrosine kinase                                    | 0,675471068 | 0,181465704 |    |
| 140 | PRTPGGRR       | Myelin basic protein                                    | 2,309114589 | 0,655024954 | On |
| 141 | KLSPSPSSR      | Lamin B1                                                | 1,349358073 | 0,214717889 | On |
| 142 | LEKKYVRRD      | macrophage colony stimulating factor 1 receptor         | 1,38561053  | 0,414805308 |    |
| 143 | QASSTPLSP      | Lamin A/C                                               | 0,46887469  | 0,035181852 |    |
| 144 | SRRDSLFP       | Sodium channel protein type II alpha                    | 0,61085056  | 0,070349961 |    |
| 145 | KQPIYVME       | Tyrosine-protein kinase transforming protein Fps        | 0,586019798 | 0,044268615 |    |
| 146 | LLQDSVDFS      | vimentin                                                | 0,554447924 | 0,098616974 |    |
| 147 | QLSTSEENS      | Alpha-S2 casein                                         | 0,48854329  | 0,080209922 |    |
| 148 | KIQASFRGH      | neurogranin                                             | 2,207833061 | 0,410589133 | On |
| 149 | NKGASQAGM      | calponin alpha and beta                                 | 0,876284883 | 0,171242566 |    |
| 150 | EIVESLSSS      | Beta casein                                             | 0,670224112 | 0,025055133 |    |
| 151 | ESSNYMAPY      | platelet-derived growth factor receptor                 | 0,707812706 | 0,161598162 |    |
| 152 | KRPSKRAKA      | Myelin basic protein                                    | 1,435215898 | 0,076053833 | On |
| 153 | NRAITARRQ      | Troponin I                                              | 1,323140021 | 0,159691695 | On |
| 154 | PYKFPSSPLRIPGZ |                                                         | 0,627126678 | 0,021952225 |    |
| 155 | GSRPSESNG      | Lens fiber major intrinsic protein                      | 0,653938927 | 0,09687002  |    |
| 156 | DAHKSKRQH      | transcription factor BAF1                               | 0,934590472 | 0,115892853 | On |
| 157 | DSLIYDDGL      | Probable receptor with tyrosine-protein kinase activity | 1,392401816 | 0,749077454 |    |
| 158 | GGRDSRSGS      | Myelin basic protein                                    | 0,722723572 | 0,047011809 |    |
| 159 | GVERSVRPT      | phosphorylase b kinase alpha                            | 0,823102038 | 0,077716954 |    |
| 160 | EGVKSDQAE      | neurofilament triplet M                                 | 0,719645472 | 0,169314335 |    |
| 161 | ESLSSSEES      | Beta casein                                             | 0,716980135 | 0,088969241 |    |
| 162 | RVRMSADAM      | Troponin I                                              | 0,495563258 | 0,096480599 |    |
| 163 | SNPTYSVMR      | Middle T antigen                                        | 1,174185339 | 0,245617546 |    |
| 164 | SSKRAK         | Myosin regulatory light chain 2                         | 1,340508538 | 0,405883457 |    |
| 165 | AGDGSDEEV      | myosin heavy chain                                      | 0,770158616 | 0,091782665 |    |
| 166 | AVDRYIAIT      | Beta-2 adrenergic receptor                              | 0,693964143 | 0,112091079 |    |
| 167 | DPLLTFRFP      | Lamin A/C                                               | 0,690500364 | 0,053489949 |    |

|     |                |                                                  |             |             |    |
|-----|----------------|--------------------------------------------------|-------------|-------------|----|
| 168 | GENIYIRHS      | erythrocyte protein 4.1                          | 0,954108676 | 0,156747487 |    |
| 169 | RLSPSPTSQ      | Lamin C                                          | 0,622321282 | 0,158717094 |    |
| 170 | RKESYSV        | Histone H2B                                      | 0,683576358 | 0,134970519 |    |
| 171 | PLSRTL         | Glycogen [starch] synthase                       | 0,636536865 | 0,062330758 |    |
| 172 | RSRASTPPA      | cAMP-dependent protein kinase II (PKA)           | 0,884770423 | 0,143070246 |    |
| 173 | SLSSSEESI      | Beta casein                                      | 0,987865851 | 0,289868946 |    |
| 174 | LRRASLAG       | Red cell/liver pyruvate kinase                   | 1,461913253 | 0,583613111 |    |
| 175 | ADSESEDEE      | cAMP-dependent protein kinase II (PKA)           | 1,381983081 | 0,7220706   |    |
| 176 | THERSPSPS      | phosphorylcholine transferase                    | 0,662732454 | 0,100993879 |    |
| 177 | TVTRSRSV       | Lamin A/C                                        | 2,041834956 | 0,929935308 |    |
| 178 | YETDYRKG       | Insulin Receptor (IR)                            | 1,124344439 | 0,344747726 |    |
| 179 | RKQISVRGL      | Glycogen phosphorylase                           | 1,563529373 | 0,514501709 |    |
| 180 | AGTTYAL        | myosin heavy chain IA (fragment)                 | 0,657877668 | 0,114190272 |    |
| 181 | LRRASVA        | pyruvate kinase                                  | 1,354609835 | 0,473111077 |    |
| 182 | YRGYSLGNW      | Lysozyme C                                       | 0,744363759 | 0,082538859 |    |
| 183 | SSLKSRKRA      | spermatid nuclear transition protein 1           | 2,040132646 | 0,787278522 |    |
| 184 | PMRRSVSEA      | hormone sensitive lipase                         | 0,704057001 | 0,069177112 |    |
| 185 | RSKRSGSV       | phosphorylase b kinase beta                      | 2,308254654 | 0,741224035 | On |
| 186 | TEGQYQQQP      | Proto-oncogene tyrosine-protein kinase Lck       | 0,74081616  | 0,002127214 | On |
| 187 | TTPLSPTRL      | Lamin B2                                         | 1,089953191 | 0,24505564  |    |
| 188 | PQPEYVNQP      | Receptor tyrosine-protein kinase erbB-2          | 0,751206389 | 0,038981606 |    |
| 189 | VKRGISGL       | Histone H4                                       | 1,384105375 | 0,340851677 |    |
| 190 | KRKQISVRG      | Glycogen phosphorylase                           | 2,113285511 | 0,732723086 |    |
| 191 | LPVPSTHIG      | cGMP-dependent protein kinase (PKG)              | 0,578042605 | 0,065186222 |    |
| 192 | QRRHSLEPP      | Tyrosine-protein kinase transforming protein SRC | 0,842632759 | 0,116816768 |    |
| 193 | SRTLVSSSL      | Glycogen [starch] synthase                       | 0,925444117 | 0,072311085 | On |
| 194 | KRPSEKA        | Myelin basic protein                             | 2,160264612 | 0,060573848 | On |
| 195 | LRGRSFMNN      | 6-phosphofructokinase                            | 1,371832413 | 0,204483141 | On |
| 196 | QRVSSYRRT      | Desmin                                           | 2,299971825 | 0,797606373 |    |
| 197 | HDLSEMFN       | Prolactin                                        | 0,471657022 | 0,114390212 |    |
| 198 | KRPSRAKA       | Myelin basic protein                             | 1,952993653 | 0,078045483 | On |
| 199 | EDNEYTARP      | Proto-oncogene tyrosine-protein kinase Src       | 1,301154554 | 0,348449532 |    |
| 200 | ENAPSSTSS      | DNA topoisomerase II                             | 0,498238454 | 0,099645143 |    |
| 201 | HMRSSMSGL      | acetyl-CoA carboxylase                           | 0,778162138 | 0,31930755  |    |
| 202 | LDRSSHAQR      | Insulin Receptor (IR)                            | 0,568853378 | 0,251296419 |    |
| 203 | PYKFPSSPLRIPGZ |                                                  | 0,589335088 | 0,247155599 |    |
| 204 | GKEIYNTIR      | Ras p21 activator protein                        | 0,486086032 | 0,14338893  |    |
| 205 | APATPGGRR      | Myelin basic protein                             | 1,526894247 | 0,12581455  | On |
| 206 | DEEESSEAK      | elongation factor 1-beta                         | 0,641934371 | 0,153082761 |    |
| 207 | FFKKSIST       | glutamate receptor 6                             | 1,474414895 | 0,790157993 |    |
| 208 | GMGTSVERA      | pyruvate dehydrogenase E1                        | 0,567343048 | 0,202662552 |    |
| 209 | DYDSSDIED      | cactus                                           | 1,775459488 | 0,648291312 |    |
| 210 | EKRASQAF       | stathmin                                         | 0,722129133 | 0,184281705 |    |
| 211 | RRAVSELDA      | tyrosine 3-monooxygenase                         | 0,437232131 | 0,097017377 |    |
| 212 | SDGGYMDMS      | platelet-derived growth factor receptor          | 0,558656944 | 0,144686556 |    |
| 213 | NWHMTPPRK      | serine/threonine protein phosphatase PP1         | 0,755881802 | 0,191554903 |    |
| 214 | RRASI          | pyruvate kinase                                  | 1,643270897 | 0,203254523 | On |
| 215 | AKKGSEQES      | cAMP-dependent protein kinase (PKA)              | 0,506805697 | 0,209711643 |    |
| 216 | DDEMTGYVA      | Mitogen-activated protein kinase p38             | 0,702115338 | 0,293993121 |    |
| 217 | ETDYRKG        | Insulin Receptor (IR)                            | 0,665768219 | 0,217873813 |    |
| 218 | YVTTSTRTY      | vimentin                                         | 0,736005456 | 0,082215407 |    |
| 219 | SPQPSRRGS      | protein phosphatase 1                            | 1,676964955 | 0,089763933 | On |
| 220 | RRAASVA        | pyruvate kinase                                  | 1,183065922 | 0,139709248 | On |
| 221 | RPSENGQP       | Lens fiber major intrinsic protein               | 0,384094448 | 0,105753814 |    |
| 222 | SASTTPVKK      | Histone H1                                       | 0,841670008 | 0,134935962 |    |
| 223 | NSYGSRRG       | iron-responsive element binding protein          | 1,756374659 | 0,259346092 | On |

|     |                |                                                         |             |              |    |
|-----|----------------|---------------------------------------------------------|-------------|--------------|----|
| 224 | LRRASL         | pyruvate kinase                                         | 1,064659426 | 0,183191197  |    |
| 225 | SSTDSADSG      | Early E1A                                               | 0,543545968 | 0,085468658  |    |
| 226 | TKSGSTTKN      | eukaryotic translation initiation factor 4E             | 0,745006161 | 0,173481772  |    |
| 227 | VETTYADFI      | cAMP-dependent protein kinase inhibitor alpha           | 0,721105578 | 0,194039013  |    |
| 228 | YSFTTTAER      | Actin                                                   | 0,409523036 | 0,094433643  |    |
| 229 | SPFKYQSLL      | Beta-2 adrenergic receptor                              | 0,506692639 | 0,134473015  |    |
| 230 | RKRSAAE        | Histone H2B                                             | 0,881906468 | 0,194662648  |    |
| 231 | VIKRSPRKR      | transcriptional factor SWI6                             | 2,389070241 | 0,094445992  | On |
| 232 | SPVKSPEAK      | neurofilament triplet M                                 | 0,608472358 | 0,124740139  |    |
| 233 | LRRASVAQL      | pyruvate kinase                                         | 1,702236557 | 0,282355923  | On |
| 234 | PRMPSLSVP      | Sodium channel protein                                  | 0,539026233 | 0,12184807   |    |
| 235 | SSPVYQDAV      | Cortactin                                               | 0,675150165 | 0,238082776  |    |
| 236 | TKDITYDALH     | T-cell surface glycoprotein CD3 zeta                    | 0,545393153 | 0,212635426  |    |
| 237 | LRSPSWEPF      | Heat Shock Protein 26                                   | 0,620519227 | 0,280164647  |    |
| 238 | PSLPTPPTR      | Microtubule-associated protein tau                      | 0,986153655 | 0,158150763  |    |
| 239 | KASASPRRK      | Histone H3                                              | 2,357534923 | 0,155458214  | On |
| 240 | KRRDYDLDA      | Probable receptor with tyrosine-protein kinase activity | 0,635048103 | 0,132289954  |    |
| 241 | PAPAVRASDRA    | Troponin I                                              | 0,544984414 | 0,173098634  |    |
| 242 | QSRASDKQT      | T-cell surface glycoprotein CD3 gamma                   | 0,511583419 | 0,155754256  |    |
| 243 | KGQESFKKQ      | Nucleophosmin                                           | 1,235868011 | 0,199050543  | On |
| 244 | KRSGSVYEP      | phosphorylase b kinase beta                             | 1,089268561 | 0,391250182  |    |
| 245 | KRAQISVRGL     | Glycogen phosphorylase                                  | 2,056118284 | 0,418437772  | On |
| 246 | HSSQSQGGG      | Lamin C                                                 | 0,604527206 | 0,247909313  |    |
| 247 | MAEAYSEIG      | T-cell surface glycoprotein CD3 zeta                    | 0,83648928  | 0,257606355  |    |
| 248 | EEESSYSYE      | RNA polymerase alpha                                    | 2,489571463 | 0,996812462  |    |
| 249 | EQPGSDEDED     | Ornithine decarboxylase                                 | 0,721252298 | 0,094122819  |    |
| 250 | IEQFSTVKG      | G protein-coupled receptor kinase 5                     | 0,504372345 | 0,076489122  |    |
| 251 | MLDHSESTK      | myelin                                                  | 0,480916045 | 0,151812593  |    |
| 252 | PYKFPSSPLRIPGZ |                                                         | 0,40022438  | 0,089117323  |    |
| 253 | GPRTTRAQG      | cGMP-dependent protein kinase (PKG)                     | 1,384832413 | 0,123105957  | On |
| 254 | AQDTYLVLD      | Erythropoietin Receptor                                 | 0,766383091 | 0,292397144  |    |
| 255 | DIPESQMEE      | Band 3 anion transport protein                          | 0,692405315 | 0,123486976  |    |
| 256 | FPRASFGSR      | Desmin                                                  | 1,26165839  | 0,108209928  | On |
| 257 | GRKASGSSP      | myosin light chain kinase                               | 0,969563137 | 0,122938649  | On |
| 258 | EDVGSDEEE      | HSP90-alpha                                             | 0,79964436  | 0,224800273  |    |
| 259 | EPAVSPLLP      | Tyrosine-protein kinase Dash/Abl                        | 0,570644332 | 0,175038037  |    |
| 260 | RRRASQLKI      | Gamma-aminobutyric-acid receptor beta-2                 | 0,727539136 | 0,149394201  |    |
| 261 | SFTTTAERE      | Actin                                                   | 0,569995039 | 0,198938281  |    |
| 262 | PLSRTL         | glycogen synthase                                       | 0,597697576 | 0,171983231  |    |
| 263 | SGRGK          | Histone H4                                              | 0,995892186 | 0,187318793  |    |
| 264 | APRSPGGRR      | Myelin basic protein                                    | 1,969230406 | 0,228097413  | On |
| 265 | DGERYDEDE      | Glycogen [starch] synthase                              | 0,801053715 | 0,1111703089 |    |
| 266 | FKRPTLRRV      | troponin I                                              | 2,023413641 | 0,129947562  | On |
| 267 | REAEYEPET      | Cortactin                                               | 0,800147506 | 0,344208734  |    |
| 268 | DRVYIHPF       | Angiotensinogen                                         | 0,625869899 | 0,196173673  |    |
| 269 | VRRISGL        | Histone H4                                              | 1,476074086 | 0,184672178  | On |
| 270 | RRKGTDVNV      | Annexin I                                               | 0,911645367 | 0,197682156  |    |
| 271 | SETKTEEEE      | DNA topoisomerase II                                    | 0,60567191  | 0,198957483  |    |
| 272 | PQRATSNVF      | Myosin regulatory light chain 2                         | 0,632410678 | 0,122265044  |    |
| 273 | RRGSV          | pyruvate kinase or palladin                             | 1,393750962 | 0,131534312  | On |
| 274 | STSKSESSQ      | 40S ribosomal protein S6                                | 0,558557867 | 0,218936099  |    |
| 275 | TRAPSRTAS      | ATP-citrate (pro-S-) lyase                              | 1,475964388 | 0,135031684  | On |
| 276 | VPRTPGGRR      | Myelin basic protein                                    | 2,323571122 | 0,216207463  | On |
| 277 | RASSRSVR       | Lamin B0                                                | 2,413915956 | 0,686064194  | On |
| 278 | SPSSSPASL      | phosphorylcholine transferase                           | 0,534260269 | 0,147046046  |    |
| 279 | RVYVHPF        |                                                         | 0,902007568 | 0,051583076  | On |

|     |                |                                                     |             |             |    |
|-----|----------------|-----------------------------------------------------|-------------|-------------|----|
| 280 | VRRVSDDDR      | Tyrosine 3-monooxygenase                            | 0,423714117 | 0,063545226 |    |
| 281 | SRKMSIQEY      | phosducin                                           | 0,747553532 | 0,273920559 |    |
| 282 | LSGFSEKKS      | myristolated alanine-rich C-kinase substrate        | 1,442652712 | 0,403229086 |    |
| 283 | PSSTSSSSI      | DNA topoisomerase II                                | 0,642070452 | 0,138247394 |    |
| 284 | STGIYEAL       | Alpha enolase                                       | 1,20484308  | 0,179802733 | On |
| 285 | TPPKSPSAS      | Microtubule-associated protein tau                  | 0,502287225 | 0,09013395  |    |
| 286 | LYSSSPGGA      | vimentin                                            | 0,494313667 | 0,145923057 |    |
| 287 | PVPKSPVEE      | neurofilament triplet M                             | 0,446873127 | 0,136112951 |    |
| 288 | KKASFKAKK      |                                                     | 2,938030885 | 0,926194349 | On |
| 289 | KSPAKTPVK      | Actin and myosin binding protein                    | 1,69938565  | 0,467082503 | On |
| 290 | PLSKTSLVSS     | Glycogen [starch] synthase                          | 0,594392611 | 0,118421681 |    |
| 291 | SRGKSSSYS      | Fibrinogen alpha                                    | 1,156631853 | 0,164519707 | On |
| 292 | KKLGSKKPQ      | Sodium channel protein type II alpha                | 1,872871514 | 0,891454629 |    |
| 293 | KTASTRKY       | cystic fibrosis transmembrane conductance regulator | 2,508654977 | 0,369785599 | On |
| 294 | PRRTRRAS       | Protamine YII                                       | 0,647479179 | 0,118858209 |    |
| 295 | IHQRSRRL       | Neutrophil cytosol factor 2                         | 1,238263235 | 0,483315219 |    |
| 296 | NDALSGSGN      | galectin-3                                          | 0,468553049 | 0,079731833 |    |
| 297 | EETQTQDQP      | HSP90-alpha                                         | 0,367822839 | 0,107605016 |    |
| 298 | ERSQSRKDS      | alpha-1B adrenergic receptor                        | 0,427200289 | 0,144408375 |    |
| 299 | IRQASQAGP      | synapsins                                           | 0,460248169 | 0,089016439 |    |
| 300 | NFDDYMKEV      | Fatty acid-binding protein                          | 0,431065605 | 0,099475114 |    |
| 301 | PYKFPSSPLRIPGZ |                                                     | 0,522048396 | 0,074698956 |    |
| 302 | GRRQSLIQD      | tyrosine 3-monooxygenase                            | 0,556947836 | 0,011824769 |    |
| 303 | ASFEYTILD      | Erythropoietin Receptor                             | 0,770485734 | 0,085620077 |    |
| 304 | DLSTYASIN      | Insulin receptor substrate 2                        | 0,511099095 | 0,102553999 |    |
| 305 | GDNDYIPL       | platelet-derived growth factor receptor             | 0,766706757 | 0,135395503 |    |
| 306 | GSESTEDQA      | Alpha-S1 casein                                     | 0,465258028 | 0,105243033 |    |
| 307 | EENVSVDDT      | eukaryotic translation initiation factor 4E         | 0,55659267  | 0,093983119 |    |
| 308 | ERRKSKSGA      | cAMP-regulated phosphoprotein 21                    | 1,055251554 | 0,28773959  |    |
| 309 | RRRSRSRS       | Lamin B receptor                                    | 2,775662434 | 0,329334603 | On |
| 310 | SKIGSLDNI      | Microtubule-associated protein tau                  | 0,617614243 | 0,121290597 |    |
| 311 | NDITSL         | Tropomyosin beta                                    | 0,613388675 | 0,067966478 |    |
| 312 | AARGSFDA       | rhodopsin kinase                                    | 0,49923992  | 0,038341449 |    |
| 313 | ARNDSVTVA      | cAMP response element-binding protein CRE-BP1       | 0,571959206 | 0,118888361 |    |
| 314 | DLFGSDEED      | elongation factor 1-beta                            | 0,949128483 | 0,231679468 |    |
| 315 | FSSRSYTSG      | Keratin 8                                           | 1,082181    | 0,320014342 |    |
| 316 | RGKSSYSK       | Fibrinogen alpha                                    | 1,22906977  | 0,385043191 |    |
| 317 | RKRSRAEA       | Histone H2B                                         | 0,808526647 | 0,113660709 |    |
| 318 | LKRASLG        | pyruvate kinase                                     | 0,572509507 | 0,023465583 |    |
| 319 | RRRPTPATL      | Protein phosphatase inhibitor 1                     | 1,141387678 | 0,224525759 |    |
| 320 | SIADTFVGT      | Serine/threonine-protein kinase STE7                | 0,576691261 | 0,144774483 |    |
| 321 | LRRNSI         | cystic fibrosis transmembrane conductance regulator | 1,024697204 | 0,451339122 |    |
| 322 | RRRRASVA       | pyruvate kinase                                     | 2,611798539 | 0,828822622 | On |
| 323 | TATDYHTTS      | Band 3 anion transport protein                      | 0,53521293  | 0,120307941 |    |
| 324 | TRRASRPVR      | Protamine YII                                       | 1,467284919 | 0,528959005 |    |
| 325 | VSSSYRRM       | vimentin                                            | 1,656512716 | 0,725429403 |    |
| 326 | REVSSLKKN      | myosin heavy chain                                  | 0,802366585 | 0,119316986 |    |
| 327 | LSYRRYSL       |                                                     | 1,278890992 | 0,475711062 |    |
| 328 | KKKASVA        | pyruvate kinase                                     | 0,916476589 | 0,281399412 |    |
| 329 | WKRTSMKLL      | dihydropyridine-sensitive calcium channel           | 1,43006559  | 0,603203448 |    |
| 330 | SRRQSVLVK      | glutamate receptor 6                                | 1,26095552  | 0,285839179 |    |
| 331 | PENDYEDVE      | Hematopoietic cell-specific LYN substrate           | 1,420837043 | 0,590293679 |    |
| 332 | QEGLYNELQ      | T-cell surface glycoprotein CD3 zeta                | 0,540408841 | 0,039493054 |    |
| 333 | SVPPSPSLS      | Glycogen [starch] synthase                          | 0,416008669 | 0,045876685 |    |
| 334 | TRKVSLAPQ      | cystic fibrosis transmembrane conductance regulator | 0,644454114 | 0,17077962  |    |
| 335 | PKDPSQRRR      | Proto-oncogene tyrosine-protein kinase Src          | 1,082236949 | 0,333184148 |    |

|     |                |                                                           |             |             |    |
|-----|----------------|-----------------------------------------------------------|-------------|-------------|----|
| 336 | KRKQISVR       | Glycogen phosphorylase                                    | 2,575030871 | 1,444438137 |    |
| 337 | KLRRSSSVG      | Acetylcholine receptor protein delta                      | 2,411857384 | 0,185073193 | On |
| 338 | LDPLSEPED      | Thyroid hormone receptor alpha                            | 0,689117938 | 0,016657441 |    |
| 339 | QAGMTAPGT      | calponin alpha and beta                                   | 0,457547647 | 0,072245663 |    |
| 340 | SRRASRPVR      | Protamine Z                                               | 1,153114839 | 0,187500786 | On |
| 341 | KPGFSPQPS      |                                                           | 0,711819033 | 0,210008686 |    |
| 342 | LLPMSPEEF      | Signal Transducer and Activator of Transcription 1        | 0,554549675 | 0,051564091 |    |
| 343 | QLNDSSEEE      | E7 protein                                                | 0,792362824 | 0,20995554  |    |
| 344 | KGGSYSQAA      | HLA class I histocompatibility antigen B7                 | 0,694644472 | 0,008245118 | On |
| 345 | NIYISPLKS      | Retinoblastoma-associated protein                         | 0,892649971 | 0,060417496 | On |
| 346 | EIRVSINEK      | cGMP-dependent protein kinase (PKG)                       | 0,536704452 | 0,069866788 |    |
| 347 | ESRISLPLP      | vimentin                                                  | 0,662693712 | 0,162075393 |    |
| 348 | KRPSIRAKA      | Myelin basic protein                                      | 2,871855769 | 0,679959353 | On |
| 349 | NPGFYVEAN      | 1-phosphatidylinositol-4,5-bisphosphate phosphodiesterase | 1,137641863 | 0,084089378 | On |
| 350 | PYKFPSSPLRIPGZ |                                                           | 0,793817845 | 0,162335714 |    |
| 351 | GSRGSQSSV      | Desmin                                                    | 0,686467416 | 0,127328066 |    |
| 352 | DAGASPVEK      | myristolated alanine-rich C-kinase substrate (MARCKS)     | 0,535685794 | 0,0530657   |    |
| 353 | DRRVSAAE       | cAMP-dependent protein kinase II (PKA)                    | 0,578520558 | 0,039935437 |    |
| 354 | GGRASDYKS      | Myelin basic protein                                      | 0,886829387 | 0,173184497 |    |
| 355 | GVDTYVEMR      | Macrophage colony stimulating factor I receptor           | 0,946755742 | 0,126723869 |    |
| 356 | EGTHSTKRG      | Fibrinogen alpha                                          | 1,145308192 | 0,040004357 | On |
| 357 | ESLESYEIN      | Matrix Gla-protein                                        | 1,4300175   | 0,3388072   | On |
| 358 | RVRKTKGKY      | glutamate receptor 1                                      | 2,991024116 | 0,945309178 | On |
| 359 | SNPEYLSAS      | Insulin Receptor (IR)                                     | 0,711190954 | 0,076430033 |    |
| 360 | RRSTVA         | Protamines Z1 and Z2                                      | 1,491200953 | 0,172002088 | On |
| 361 | AEPGSPTAA      | myristolated alanine-rich C-kinase substrate (MARCKS)     | 0,543070025 | 0,078266378 |    |
| 362 | AVDGYVKPQ      | Signal Transducer and Activator of Transcription 5        | 0,80153021  | 0,204154092 |    |
| 363 | DPGVSYRTR      | pyruvate dehydrogenase E1                                 | 1,190334651 | 0,297039763 |    |
| 364 | GEINTEDDD      | calsequestrin                                             | 0,855466427 | 0,105471378 |    |
| 365 | RLSISTESQ      | phosphorylase b kinase alpha                              | 0,526344293 | 0,084629205 |    |
| 366 | RKEISVR        | Glycogen phosphorylase                                    | 1,467817387 | 0,308986764 | On |
| 367 | PGSPQKR        | Histone H2                                                | 0,557956115 | 0,06414774  |    |
| 368 | RSGYSSPGS      | Microtubule-associated protein tau                        | 0,767776547 | 0,075018454 |    |
| 369 | SLRASTSKS      | 40S ribosomal protein S6                                  | 1,603642822 | 0,295914263 | On |
| 370 | VRKISGL        | Histone H4                                                | 1,043870393 | 0,248293339 |    |
| 371 | ADGVYAASG      | Tyrosine-protein kinase transforming protein Fes          | 0,901835251 | 0,137888425 |    |
| 372 | TGFLTEYVA      | myelin                                                    | 0,825549842 | 0,146422442 |    |
| 373 | TVSTSLGHS      | muscarinic acetylcholine receptor M2                      | 0,492523666 | 0,079443442 |    |
| 374 | YDKEYYSVH      | Receptor tyrosine kinase for hepatocyte growth factor     | 1,001291398 | 0,173517328 |    |
| 375 | RKLSQGTR       | spermatid nuclear transition protein 2                    | 1,344532723 | 0,127201461 | On |
| 376 | NRKPSKDKD      | Gamma-aminobutyric-acid receptor gamma                    | 1,22545122  | 0,122738388 | On |
| 377 | LRRASPG        | pyruvate kinase                                           | 1,023256552 | 0,049592555 | On |
| 378 | YMAPYDNYV      | platelet-derived growth factor receptor                   | 1,177528979 | 0,416948728 |    |
| 379 | SSKAYGNGY      | Beta-2 adrenergic receptor                                | 0,581948182 | 0,030851963 |    |
| 380 | PLTPSGEAP      | EGF Receptor                                              | 0,613717582 | 0,083661414 |    |
| 381 | RRRRPTPA       | pyruvate kinase                                           | 3,925789468 | 0,057428112 | On |
| 382 | TEGQYQPQP      | Proto-oncogene tyrosine-protein kinase Lck                | 0,740484087 | 0,061695199 |    |
| 383 | TSSSIFDI       | DNA topoisomerase II                                      | 0,816996667 | 0,205989462 |    |
| 384 | PPSPSLSRH      | Glycogen [starch] synthase                                | 2,610550676 | 0,893434801 | On |
| 385 | SSKRAKAK       | Myosin regulatory light chain 2                           | 2,099774071 | 0,358127371 | On |
| 386 | KRKNSILNP      | cystic fibrosis transmembrane conductance regulator       | 1,41748217  | 0,280213859 | On |
| 387 | LNRMSFASN      | acetyl-CoA carboxylase                                    | 0,912111542 | 0,111443877 |    |
| 388 | QRHGSKYLA      | Myelin basic protein                                      | 0,6992786   | 0,060953094 |    |
| 389 | SRTASFSES      | ATP-citrate (pro-S-) lyase                                | 0,704280196 | 0,143252713 |    |
| 390 | KRPSDRAKA      | Myelin basic protein                                      | 2,049195482 | 0,517482208 | On |
| 391 | LRGPSWDPF      | Heat Shock Protein 27                                     | 0,743596639 | 0,193533979 |    |



|     |                |                                                           |             |             |    |
|-----|----------------|-----------------------------------------------------------|-------------|-------------|----|
| 392 | QRSTSTPNV      | RAF proto-oncogene ser/thr-protein kinase                 | 0,612748396 | 0,052627147 |    |
| 393 | HDALSGSGN      | galectin-3                                                | 0,522219652 | 0,207967548 |    |
| 394 | KRPSQRAKY      | Myelin basic protein                                      | 1,547104731 | 0,513597121 |    |
| 395 | EDNEYTARE      | Tyrosine-protein kinase Hck                               | 0,888471079 | 0,112687032 |    |
| 396 | ENAFSPSRS      | caldesmon                                                 | 0,535660455 | 0,186151556 |    |
| 397 | HKSGYLSSE      | Connection of cytoskeletal structure to plasma membrane   | 0,51590784  | 0,19823102  |    |
| 398 | LAYESHESM      | Matrix Gla-protein                                        | 0,518580986 | 0,214911744 |    |
| 399 | PYKFPSSPLRIPGZ |                                                           | 0,604338801 | 0,164055793 |    |
| 400 | GHQGTVPD       | Beta-2 adrenergic receptor                                | 0,440055821 | 0,169841046 |    |
| 401 | ANDEYFIRK      | Acetylcholine receptor protein beta                       | 0,47580172  | 0,149497548 |    |
| 402 | DEASTTVSK      | Rhodopsin                                                 | 0,520447408 | 0,138714902 |    |
| 403 | FEARYQQPF      | 1-phosphatidylinositol-4,5-bisphosphate phosphodiesterase | 0,535252611 | 0,147542187 |    |
| 404 | GLLRSWNDP      | Prolactin                                                 | 0,522505277 | 0,164797328 |    |
| 405 | DTVSTPQRA      | Proto-oncogene tyrosine-protein kinase Src                | 1,204048973 | 0,549569296 |    |
| 406 | EKHHSIDAQ      | Phosphoenolpyruvate carboxylase 1                         | 0,560033644 | 0,160104104 |    |
| 407 | RRASTIEMP      | Cardiac phospholamban                                     | 0,57188243  | 0,16075976  |    |
| 408 | SDEESNDDS      | calsequestrin                                             | 0,597596085 | 0,040903977 |    |
| 409 | NVFSSPGGT      | Actin and myosin binding protein                          | 0,503700549 | 0,120392271 |    |
| 410 | RRASF          | pyruvate kinase                                           | 1,200406341 | 0,363655295 |    |
| 411 | AKGGTVKAA      | annexin IV                                                | 0,663494016 | 0,06859937  |    |
| 412 | DDEITQDEN      | muscarinic acetylcholine receptor M2                      | 0,563937826 | 0,11850615  |    |
| 413 | ETDDYAEII      | Focal adhesion kinase                                     | 0,670595617 | 0,123741442 |    |
| 414 | YTTNSPSKI      | transcriptional factor SWI7                               | 0,516619649 | 0,038773022 |    |
| 415 | SPLKSPYKI      | Retinoblastoma-associated protein                         | 0,637071279 | 0,057776136 |    |
| 416 | RKRTRKE        | Histone H2B                                               | 1,358002767 | 0,557497155 |    |
| 417 | RPPGFTPFR      |                                                           | 1,120858076 | 0,226516413 |    |
| 418 | SASGTPNKE      | caldesmon                                                 | 0,468427014 | 0,183131527 |    |
| 419 | NSVDTSSLS      | Glycogen [starch] synthase                                | 0,573822643 | 0,135305857 |    |
| 420 | LRANSI         | cystic fibrosis transmembrane conductance regulator       | 0,524373338 | 0,124198634 |    |
| 421 | SSSSPSRR       | Lamin B receptor                                          | 1,556704997 | 0,534324084 |    |
| 422 | TKSASFLKG      | nodulin-26                                                | 0,917601849 | 0,03641886  | On |
| 423 | VESLSSSEE      | Beta casein                                               | 0,651149206 | 0,106925417 |    |
| 424 | YRRNSVRFL      | Neutrophil cytosol factor 3                               | 1,367050966 | 0,558688565 |    |
| 425 | SPALTGDEA      | Insulin receptor substrate 4                              | 0,541613274 | 0,120175154 |    |
| 426 | RKQITVR        | Glycogen phosphorylase                                    | 1,597626107 | 0,810903144 |    |
| 427 | VHNRSKINL      | HMG-CoA reductase                                         | 0,823359598 | 0,07799982  |    |
| 428 | SPVHSIADE      | fructose-1,6-bisphosphatase                               | 0,460759128 | 0,057438135 |    |
| 429 | LRRASLGAF      | pyruvate kinase                                           | 1,638181724 | 0,611949921 |    |
| 430 | PRKGSPRKG      | Histone H2B.2                                             | 1,0883005   | 0,176998351 | On |
| 431 | SSPGSPGTP      | Microtubule-associated protein tau                        | 0,501546308 | 0,048494274 |    |
| 432 | TKAASEKKT      | myelin                                                    | 0,484255937 | 0,044892118 |    |
| 433 | LRRSSSVGY      | Acetylcholine receptor protein delta                      | 2,464528365 | 0,993094545 |    |
| 434 | PSEKSEEIT      | astrocytic phosphoprotein PEA-15                          | 0,589355451 | 0,077366046 |    |
| 435 | KAQEYFNIK      | Acetylcholine receptor protein delta                      | 0,511318811 | 0,058066495 |    |
| 436 | KRQSSTSNA      | phosphorylase b kinase beta                               | 0,971351164 | 0,112126587 | On |
| 437 | QKRPSQRSKYL    | Myelin basic protein                                      | 1,696207776 | 0,489139833 |    |
| 438 | QSPSSSPH       | phosphorylcholine transferase                             | 0,467809537 | 0,094463095 |    |
| 439 | KGHEYTNIK      | Protein-tyrosine phosphatase 2                            | 0,662908046 | 0,136313852 |    |
| 440 | KRRSSSYHV      | Sodium channel protein type II alpha                      | 2,956675969 | 0,979636389 | On |
| 441 | KAKQISVRGL     | Glycogen phosphorylase                                    | 1,709757681 | 0,826004966 |    |
| 442 | HSIYSSDDD      | Myb proto-oncogene protein                                | 0,613990849 | 0,374895661 |    |
| 443 | LVMQTAAGT      | myosin light chain kinase                                 | 0,578428223 | 0,108453335 |    |
| 444 | EEELYLEPL      | Tyrosine-protein kinase receptor                          | 1,118836361 | 0,316385572 |    |
| 445 | EQLSTSEEN      | Alpha-S2 casein                                           | 0,471282114 | 0,07902491  |    |
| 446 | IDMESQERI      | Transcription factor AP-1                                 | 0,471407967 | 0,105760099 |    |
| 447 | MILLSELSR      | eukaryotic translation initiation factor 4F               | 0,420550606 | 0,054103119 |    |



|     |                |                                                       |             |             |    |
|-----|----------------|-------------------------------------------------------|-------------|-------------|----|
| 448 | PYKFPSSPLRIPGZ |                                                       | 0,349883141 | 0,039565384 |    |
| 449 | GPAASPA        | myristolated alanine-rich C-kinase substrate (MARCKS) | 0,477409983 | 0,14457546  |    |
| 450 | AQAASPAKG      | Protein tyrosine phosphatase 1B                       | 0,380708758 | 0,157898513 |    |
| 451 | DHSRSTKAA      | myelin                                                | 0,764428918 | 0,082107912 |    |
| 452 | FPFHSPSRL      | Alpha crystallin B                                    | 0,967798094 | 0,185891949 |    |
| 453 | GRILTLPRS      | Insulin Receptor (IR)                                 | 1,333920289 | 0,296306835 | On |
| 454 | EDVGSDEED      | Heat Shock Protein 90-beta                            | 0,64021017  | 0,114510426 |    |
| 455 | ENTVSTSLG      | muscarinic acetylcholine receptor M2                  | 0,40412393  | 0,058151821 |    |
| 456 | RRQHSYDTF      | glutamate (NMDA) receptor epsilon                     | 0,524046862 | 0,198090899 |    |
| 457 | SFMMTPYVV      | Stress-activated protein kinase JNK1                  | 0,493221678 | 0,103463044 |    |
| 458 | PGTESFVNA      | Beta-2 adrenergic receptor                            | 0,46302018  | 0,133930319 |    |
| 459 | SDEEV          | Troponin T                                            | 0,582772096 | 0,099386123 |    |
| 460 | APQTPGGRR      | Myelin basic protein                                  | 1,345447476 | 0,101356309 | On |
| 461 | DFPLSPPKK      | stathmin                                              | 0,519256749 | 0,078514083 |    |
| 462 | FKAFSPKGS      | Actin and myosin binding protein                      | 1,20242331  | 0,27106755  |    |
| 463 | RDSNYISKG      | platelet-derived growth factor receptor               | 0,507897652 | 0,197342581 |    |
| 464 | DDEESESD       | synaptic vesicle amine transporter                    | 0,788218534 | 0,163174121 |    |
| 465 | VKRISGL        | Histone H4                                            | 0,89516653  | 0,053986013 | On |
| 466 | RRKDYPALH      |                                                       | 0,679524727 | 0,10301457  |    |
| 467 | SEKSKGLG       | myelin                                                | 0,484846879 | 0,130784337 |    |
| 468 | PPSAYGSVK      | Annexin II                                            | 0,739715441 | 0,064559139 |    |
| 469 | RRFSV          | pyruvate kinase                                       | 1,572071297 | 0,089419841 | On |
| 470 | STRRSVGRS      | multidrug resistance protein 1                        | 2,798557446 | 0,238270671 | On |
| 471 | TQSTSGRRR      | cAMP response element-binding protein CRE-BP2         | 2,78305173  | 0,291832786 | On |
| 472 | VNELSKDIG      | Alpha-S1 casein                                       | 0,505831168 | 0,101453877 |    |
| 473 | RAGETRFTD      | elongation factor 3                                   | 0,481354017 | 0,117001993 |    |
| 474 | SPSPSFRWP      | phosphorylcholine transferase                         | 0,62971459  | 0,182057289 |    |
| 475 | RVSGSRR        | Lamin C                                               | 2,755108847 | 0,210576556 | On |
| 476 | VRLRSSVPG      | vimentin                                              | 1,432789159 | 0,094666548 | On |
| 477 | SRKLSDFGQ      | Phenylalanine-4-hydroxylase                           | 0,553753514 | 0,165021284 |    |
| 478 | LSGFSFKKN      | myristolated alanine-rich C-kinase substrate          | 1,439489762 | 0,384947634 |    |
| 479 | PSRRSRSRS      | Lamin B receptor                                      | 0,526725687 | 0,089742837 |    |
| 480 | STDYYREGP      | TrkC tyrosine kinase                                  | 1,107733573 | 0,40485938  |    |
| 481 | TPAISPSKR      | deoxyuridine 5'-triphosphate nucleotidohydrolase      | 1,657214698 | 0,272972106 | On |
| 482 | LVVASAGPT      | RNA polymerase alpha                                  | 0,6126088   | 0,124039914 |    |
| 483 | PVPEYINQS      | EGF Receptor                                          | 0,535932814 | 0,107977719 |    |
| 484 | KKAESPVKE      | neurofilament triplet M                               | 0,61486967  | 0,140158928 |    |
| 485 | KSLNYIDLD      | Insulin receptor substrate 5                          | 0,83616139  | 0,221578618 |    |
| 486 | KRKQISVRGL     | Glycogen phosphorylase                                | 1,9230304   | 0,467239542 | On |
| 487 | SRGDYMTMQ      | Insulin receptor substrate 6                          | 0,474989176 | 0,090361637 |    |
| 488 | KKKSGGEDD      | eukaryotic translation initiation factor 4F           | 0,634732805 | 0,146853471 |    |
| 489 | KTSPSSSPA      | phosphorylcholine transferase                         | 0,792791315 | 0,413170748 |    |
| 490 | PRRRSSFGI      | Acetylcholine receptor protein gamma                  | 0,611549946 | 0,065909291 |    |
| 491 | IGSVSEDNS      | acetyl-CoA carboxylase                                | 1,245924136 | 0,523920807 |    |
| 492 | NAPVSALGE      | Myb proto-oncogene protein                            | 0,385327529 | 0,006967418 |    |
| 493 | EETPYSYPT      | Paxillin                                              | 0,910866548 | 0,29759056  |    |
| 494 | ERSPSPSFR      | phosphorylcholine transferase                         | 0,927768879 | 0,245795357 |    |
| 495 | IRKYTMRRL      | Receptor tyrosine-protein kinase erbB-2               | 1,629242939 | 0,609351718 |    |
| 496 | NEEESYSY       | RNA polymerase alpha                                  | 1,939213361 | 1,11341987  |    |
| 497 | PYKFPSSPLRIPGZ |                                                       | 0,580728949 | 0,094148176 |    |
| 498 | GRRQSLIED      | Tyrosine 3-monooxygenase                              | 0,650493845 | 0,109571446 |    |
| 499 | ASATSSSGG      | Glycogen [starch] synthase                            | 0,435797603 | 0,081534511 |    |
| 500 | DLPMPSPRTL     | Signal Transducer and Activator of Transcription 3    | 0,398338465 | 0,03144129  |    |
| 501 | GDLQSAEFH      | Cystatin                                              | 0,485516555 | 0,039619432 |    |
| 502 | GSEEMYMMD      | Insulin receptor substrate 3                          | 0,536066649 | 0,092864789 |    |
| 503 | EENTYDEYE      | Cortactin                                             | 0,649602807 | 0,08216744  |    |

|     |                |                                                           |             |             |    |
|-----|----------------|-----------------------------------------------------------|-------------|-------------|----|
| 504 | ERRKSHEAE      | stathmin                                                  | 0,904466074 | 0,227229616 |    |
| 505 | RRRVTSATR      | glial fibrillary acidic protein                           | 1,781572674 | 0,765829971 |    |
| 506 | SKDSSKRGR      | myelin                                                    | 1,638838245 | 0,664441811 |    |
| 507 | MSVEEV         | eukaryotic translation initiation factor 4E               | 0,464092036 | 0,073423571 |    |
| 508 | AALESEDED      | eukaryotic translation initiation factor 4F               | 0,66028738  | 0,018931132 |    |
| 509 | ARKSTRRSI      | pleckstrin                                                | 2,012578775 | 0,89321587  |    |
| 510 | DLFGSDDEE      | elongation factor 1-beta                                  | 0,98707649  | 0,387675544 |    |
| 511 | FRRLSISTE      | phosphorylase b kinase alpha                              | 0,756226309 | 0,115208111 |    |
| 512 | RGAISAEVY      | cAMP-dependent protein kinase (PKA)                       | 0,649576704 | 0,054707006 |    |
| 513 | RKISASEF       |                                                           | 0,617621    | 0,170975111 |    |
| 514 | LHRASLG        | pyruvate kinase                                           | 0,598105982 | 0,099092802 |    |
| 515 | RRRPTPAML      | Dopamine- and cAMP-regulated neuronal phosphoprotein      | 1,092460012 | 0,245500537 |    |
| 516 | SGYSSPGSP      |                                                           | 0,493580004 | 0,075414035 |    |
| 517 | LGEGTP         | Calgranulin B                                             | 0,568615594 | 0,073757644 |    |
| 518 | RRLSSLRA       | 40S ribosomal protein S6                                  | 2,158524745 | 0,853665088 |    |
| 519 | TAESSQAE       | Neuromodulin                                              | 0,541396631 | 0,059699769 |    |
| 520 | TRRASFSAQ      | Regulatory protein ADR1                                   | 1,330754599 | 0,481149047 |    |
| 521 | VSRTSAVPT      | Desmin                                                    | 0,668810895 | 0,191386108 |    |
| 522 | REQLSTSEE      | Alpha-S2 casein                                           | 0,477396497 | 0,077062382 |    |
| 523 | LSYRGYSL       |                                                           | 0,564829223 | 0,073158975 |    |
| 524 | KASGSSP        |                                                           | 0,449362813 | 0,056121459 |    |
| 525 | VVGGSRLGA      | Protein tyrosine phosphatase 1B                           | 0,937462999 | 0,236270504 |    |
| 526 | SRRPSYRKI      | cAMP response element binding protein                     | 1,327670513 | 0,407564795 |    |
| 527 | PEGDYEEVL      | Hematopoietic cell-specific LYN substrate                 | 1,560851346 | 1,291358086 |    |
| 528 | QEGDTDAGL      |                                                           | 0,613065996 | 0,009497815 |    |
| 529 | SVFSSPAS       | caldesmon                                                 | 0,484177364 | 0,125379442 |    |
| 530 | TRKISQTAQ      | ryanodine receptor                                        | 0,585225614 | 0,011469162 |    |
| 531 | PINGSPRTP      | Retinoblastoma-associated protein                         | 0,489909543 | 0,086506934 |    |
| 532 | KQISVRGL       | Glycogen phosphorylase                                    | 1,548131101 | 0,616014049 |    |
| 533 | KLINSIADT      | Serine/threonine-protein kinase STE7                      | 0,475240959 | 0,111077844 |    |
| 534 | LDDQYTSSS      | Tyrosine-protein kinase Tec                               | 1,035006699 | 0,467663425 |    |
| 535 | PYDNYVPSA      | platelet-derived growth factor receptor                   | 0,716655221 | 0,215269855 |    |
| 536 | SRQLSSGVS      | Heat Shock Protein 27                                     | 0,437411143 | 0,131441436 |    |
| 537 | KNIVTPRTP      | Myelin basic protein                                      | 1,443331545 | 0,5321052   |    |
| 538 | LKLASPELE      | Transcription factor AP-2                                 | 0,485143678 | 0,093374854 |    |
| 539 | QLIDSMANS      | mitogen-activated protein kinase kinase 1                 | 0,542299766 | 0,027369929 |    |
| 540 | IVYKSPVVS      |                                                           | 0,720059032 | 0,080757659 |    |
| 541 | NGYISAAEL      | Calmodulin                                                | 1,08095209  | 0,397326756 |    |
| 542 | EILNSPEKA      | 14-3-3 protein alpha/beta/delta/zeta                      | 0,480736551 | 0,043580774 |    |
| 543 | ESPESTEIT      | insulin-like growth factor binding protein 1              | 0,507048339 | 0,07429975  |    |
| 544 | KRPSHRAKA      | Myelin basic protein                                      | 1,521156774 | 0,239012324 | On |
| 545 | NNYVYIDPT      | Mast/stem cell growth factor receptor                     | 0,74828403  | 0,166388126 |    |
| 546 | PYKFPSSPLRIPGZ |                                                           | 0,491350725 | 0,027736988 |    |
| 547 | GSPRTPRRG      | Retinoblastoma-associated protein                         | 2,123808262 | 0,201471841 | On |
| 548 | DADEYLIPQ      | EGF Receptor                                              | 1,011783765 | 0,3270728   |    |
| 549 | DRLVSARSV      | Receptor tyrosine kinase for hepatocyte growth factor     | 0,80539843  | 0,187618441 |    |
| 550 | GGLTSPGLS      | Keratin 8                                                 | 0,47879608  | 0,025013181 |    |
| 551 | GTVPSDNID      | Beta-2 adrenergic receptor                                | 0,631441181 | 0,07766903  |    |
| 552 | EGSAYEEVP      | 1-phosphatidylinositol-4,5-bisphosphate phosphodiesterase | 0,808649716 | 0,231687425 |    |
| 553 | ESIISQETY      | Alpha-S2 casein                                           | 1,269093884 | 0,764896692 |    |
| 554 | RVRKSKGKY      | glutamate receptor 2                                      | 3,326107142 | 1,657091866 |    |
| 555 | SNDSTSVSA      | muscarinic acetylcholine receptor M2                      | 0,637185337 | 0,056682378 |    |
| 556 | RRPTVA         | Protein phosphatase inhibitor 2                           | 1,230247374 | 0,134063619 | On |
| 557 | AEPDYGALY      | 1-phosphatidylinositol-4,5-bisphosphate phosphodiesterase | 1,075935656 | 0,449286194 |    |
| 558 | AVASSPSKA      | myristolated alanine-rich C-kinase substrate (MARCKS)     | 0,593735032 | 0,045652314 |    |
| 559 | DPGTSYRTR      | pyruvate dehydrogenase E1                                 | 0,969416126 | 0,194000443 |    |

|     |                |                                                  |             |             |    |
|-----|----------------|--------------------------------------------------|-------------|-------------|----|
| 560 | GEGTYGVVY      | cell division control protein 2                  | 0,802089079 | 0,201618761 |    |
| 561 | RLRLSPSPT      | Lamin C                                          | 1,073892274 | 0,103486482 | On |
| 562 | RKASRKE        | Histone H2B                                      | 1,310279341 | 0,250695559 | On |
| 563 | LRRWSLG        | pyruvate kinase                                  | 1,091262805 | 0,365829728 |    |
| 564 | RRVTSATRR      | glial fibrillary acidic protein                  | 2,316077231 | 0,405777443 | On |
| 565 | SLQASIVTD      | guanine nucleotide-binding protein alpha         | 0,618058633 | 0,076174867 |    |
| 566 | RRATPA         | pyruvate kinase                                  | 1,12343471  | 0,319051816 |    |
| 567 | ADGIYAASG      | Tyrosine-protein kinase transforming protein Fes | 0,827476591 | 0,291728281 |    |
| 568 | TGDTYTAHA      | Tyrosine-protein kinase Dash/Abl                 | 0,513675368 | 0,116130638 |    |
| 569 | TVSKTETSQ      | Rhodopsin                                        | 0,483133074 | 0,079355934 |    |
| 570 | WSDTQGDE       | 14-3-3 protein zeta                              | 0,842098074 | 0,115625412 |    |
| 571 | RKFSSARPE      | Sodium channel protein                           | 1,079068916 | 0,123971989 | On |
| 572 | KKKKASVA       | pyruvate kinase                                  | 1,491657768 | 0,662970393 |    |
| 573 | LRRASLG        | pyruvate kinase                                  | 1,351788374 | 0,523507213 |    |
| 574 | YKNDYYRKR      | Ros proto-oncogene tyrosine kinase               | 1,325692947 | 0,336762107 |    |
| 575 | SSEITTKDL      | Prothymosin                                      | 0,612943729 | 0,069722972 |    |
| 576 | PLSRTLVS       | glycogen synthase                                | 0,743946352 | 0,136750742 |    |
| 577 | LRRASLRG       | pyruvate kinase                                  | 2,478258769 | 0,816385309 | On |
| 578 | TEGQYELQP      | Tyrosine-protein kinase Blk                      | 0,942462738 | 0,232542731 |    |
| 579 | TSPSSPAS       | phosphorylcholine transferase                    | 0,572244169 | 0,054816302 |    |
| 580 | PPSAYGSVK      | Annexin II                                       | 0,812152033 | 0,10924995  |    |
| 581 | RTKRSGSV       | phosphorylase b kinase beta                      | 2,221900306 | 0,74310532  | On |
| 582 | KRFGSKAHM      | nitric-oxide synthase                            | 2,153444378 | 0,56840511  | On |
| 583 | LNDSEEEED      | E7 protein                                       | 0,754389003 | 0,046362424 |    |
| 584 | QRATSNVFA      | Myosin regulatory light chain 3                  | 0,600060683 | 0,081600274 |    |
| 585 | SRSRTPSLP      |                                                  | 1,5962701   | 0,387291635 | On |
| 586 | KRPSARAKA      | Myelin basic protein                             | 2,585387144 | 0,472357113 | On |
| 587 | LRAPSWIDT      | Alpha crystallin B                               | 0,689247973 | 0,098226205 |    |
| 588 | QRRTSVSGE      | cAMP-dependent protein kinase                    | 0,957984555 | 0,298341671 |    |
| 589 | HATPSPVD       | Myb proto-oncogene protein                       | 0,477187864 | 0,107697955 |    |
| 590 | KRPSQRAKA      | Myelin basic protein                             | 1,166097047 | 0,497130508 |    |
| 591 | EDAESEDEE      | Nucleophosmin                                    | 0,8552002   | 0,22382328  |    |
| 592 | ENAEYLRVA      | EGF Receptor                                     | 0,572569002 | 0,102937222 |    |
| 593 | HKRKSSQAL      | Transforming protein erbA                        | 0,845396826 | 0,102637465 |    |
| 594 | LAYESHESL      | Matrix Gla-protein                               | 0,499084491 | 0,079937922 |    |
| 595 | PYKFPSSPLRIPGZ |                                                  | 0,370054143 | 0,134652394 |    |
| 596 | GGVDYKNIH      | Macrophage colony stimulating factor I receptor  | 0,444698369 | 0,088301991 |    |
| 597 | ALRPSTSRS      | vimentin                                         | 1,060106026 | 0,446493352 |    |
| 598 | DEAATKTQT      | myosin II heavy chain                            | 0,569411486 | 0,103057683 |    |
| 599 | FARKSTRRS      | pleckstrin                                       | 1,623229879 | 0,610289351 |    |
| 600 | GLGESRKDK      | myelin                                           | 0,601662971 | 0,093815292 |    |
| 601 | DTHRTPSRS      | Proto-oncogene tyrosine-protein kinase Src       | 0,618287564 | 0,175507862 |    |
| 602 | EKESSNDST      | muscarinic acetylcholine receptor M2             | 0,440637696 | 0,181093421 |    |
| 603 | RRAISGLT       | dihydropyridine-sensitive calcium channel        | 0,485550996 | 0,142558108 |    |
| 604 | SAYRSVDEV      | 2-oxoisovalerate dehydrogenase alpha             | 0,588180799 | 0,098847249 |    |
| 605 | NTVSTSLGH      | muscarinic acetylcholine receptor M2             | 0,844630274 | 0,265818359 |    |
| 606 | RASLG          |                                                  | 0,721861711 | 0,089707634 |    |
| 607 | AKDASKRGR      | myelin                                           | 1,257960503 | 0,352593095 |    |
| 608 | DDEASTTVS      | Rhodopsin                                        | 0,480544824 | 0,123253716 |    |
| 609 | ETAESSQAE      | Neuromodulin                                     | 0,425381744 | 0,124037399 |    |
| 610 | YTRFSLARQ      | Transferrin receptor protein 1                   | 0,901609935 | 0,232548435 |    |
| 611 | SPKQSPSSS      | phosphorylcholine transferase                    | 0,533048045 | 0,108676661 |    |
| 612 | RKRSRKE        | Histone H2B                                      | 0,460051803 | 0,176320038 |    |
| 613 | RPPGFSPFR      |                                                  | 0,914116701 | 0,176046927 |    |
| 614 | SARVYENVG      | Protein-tyrosine phosphatase 3                   | 0,512421032 | 0,125246128 |    |
| 615 | NRSASEPSL      | RAF proto-oncogene ser/thr-protein kinase        | 0,405923909 | 0,148206743 |    |

|     |                |                                                           |             |             |    |
|-----|----------------|-----------------------------------------------------------|-------------|-------------|----|
| 616 | KGYSLG         | Lysozyme C                                                | 0,425798318 | 0,092479081 |    |
| 617 | SSSSSPKAE      | myristolated alanine-rich C-kinase substrate (MARCKS)     | 0,474464828 | 0,127202998 |    |
| 618 | TKKTSFVNF      | eukaryotic translation initiation factor 2 beta           | 1,042583267 | 0,562119434 |    |
| 619 | VEPLTPSGE      | EGF Receptor                                              | 0,384927141 | 0,093670728 |    |
| 620 | YRLPSNVQD      | Alpha crystallin A                                        | 0,428553933 | 0,124442282 |    |
| 621 | SPAISIHEI      | phosphorylase b kinase alpha                              | 0,419066985 | 0,171524959 |    |
| 622 | RKQISVR        | Glycogen phosphorylase                                    | 0,503428092 | 0,122795754 |    |
| 623 | VGWPTVRER      | Nef                                                       | 0,615662425 | 0,044381665 |    |
| 624 | QTYRSFHDL      | cGMP-dependent protein kinase (PKG)                       | 0,697682075 | 0,022143533 |    |
| 625 | LRRASLGAA      | pyruvate kinase                                           | 1,435231281 | 0,615991852 |    |
| 626 | PRKGSPPKR      | Histone H2B.2                                             | 0,517316627 | 0,065948565 |    |
| 627 | SSPASLSRA      | phosphorylcholine transferase                             | 0,625309068 | 0,048033144 |    |
| 628 | TKAASEKKS      | myelin                                                    | 0,50208428  | 0,152528571 |    |
| 629 | LRRPSDQEV      | c-Rel proto-oncogene protein                              | 0,464021939 | 0,132375964 |    |
| 630 | PSAPSPQPK      | Tyrosine 3-monooxygenase                                  | 0,375708588 | 0,19320081  |    |
| 631 | KAKVTGRWK      | troponin T                                                | 2,141207819 | 1,052772668 |    |
| 632 | KRPTQRAKY      | Myelin basic protein                                      | 2,720610989 | 1,065335226 |    |
| 633 | PLSRTL SVRSL   | Glycogen [starch] synthase                                | 1,231214359 | 0,360486043 |    |
| 634 | QSPGSPLEE      | Neutrophil cytosol factor 5                               | 0,583607918 | 0,162628342 |    |
| 635 | KGGYSQAA       | HLA class I histocompatibility antigen B7                 | 0,72942531  | 0,282613575 |    |
| 636 | KRRRSSKDT      | glutamate (NMDA) receptor subunit zeta 4                  | 1,487346248 | 0,560350409 |    |
| 637 | KAQISVRGL      | Glycogen phosphorylase                                    | 0,557935109 | 0,09405558  |    |
| 638 | HRTPSRSFG      | Proto-oncogene tyrosine-protein kinase Src                | 1,099777886 | 0,395900029 |    |
| 639 | LSGF SFKKN     | myristolated alanine-rich C-kinase substrate              | 1,040945295 | 0,307362468 |    |
| 640 | EEEEYMPME      | Middle T antigen                                          | 0,433160095 | 0,108961118 |    |
| 641 | EQFSTVKGV      | G protein-coupled receptor kinase 6                       | 0,478194444 | 0,115997483 |    |
| 642 | IDKISRIGF      | glycine receptor alpha                                    | 0,521097797 | 0,104052942 |    |
| 643 | MHRQETVDA      | calcium/calmodulin-dependent protein kinase type II alpha | 0,40713748  | 0,08972759  |    |
| 644 | PYKFPSSPLRIPGZ |                                                           | 0,435942206 | 0,100357004 |    |
| 645 | GNHTYQEIA      | Paxillin                                                  | 0,429925157 | 0,093469925 |    |
| 646 | APVASPAAP      | synapsins IA and IB                                       | 0,48937466  | 0,130199128 |    |
| 647 | DGNN SDEES     | calsequestrin                                             | 0,475560401 | 0,085197002 |    |
| 648 | FMTEYV VTR     | mitogen-activated protein kinase MSK7                     | 0,56565868  | 0,092875075 |    |
| 649 | GRGLSLSRF      | Myelin basic protein                                      | 1,061822629 | 0,197375756 |    |
| 650 | EDTLSDSDD      | N-myc proto-oncogene protein                              | 0,810021393 | 0,239374965 |    |
| 651 | ENQASEEED      | Dopamine- and cAMP-regulated neuronal phosphoprotein      | 0,551669464 | 0,135679994 |    |
| 652 | RRPTSPVSR      | Early E1A                                                 | 1,427293019 | 0,454377666 |    |
| 653 | SFMDSSGLG      | anti-sigma F factor antagonist                            | 0,603478863 | 0,092790702 |    |
| 654 | QKRPSQRSK      | Myelin basic protein                                      | 1,646319895 | 0,442719081 | On |
| 655 | SDEEH          | initiation factor 5A                                      | 0,466584393 | 0,142433547 |    |
| 656 | APLTPGGRR      | Myelin basic protein                                      | 1,300268724 | 0,435594011 |    |
| 657 | DEPSTPYHS      | Protein phosphatase inhibitor 2                           | 0,528440878 | 0,151251459 |    |
| 658 | FGSRSLYGL      | keratin, type II                                          | 0,649687328 | 0,162665321 |    |
| 659 | RDPVTENAV      | muscarinic acetylcholine receptor M2                      | 0,537130997 | 0,114914063 |    |
| 660 | AVRRSDRA       | Troponin I                                                | 1,020796345 | 0,205570958 |    |
| 661 | VKRG SGL       | Histone H4                                                | 1,063870745 | 0,322948491 |    |
| 662 | RRKDTPALH      |                                                           | 0,66352291  | 0,046645553 |    |
| 663 | SEITTKDLK      | Prothymosin                                               | 0,505522341 | 0,099031281 |    |
| 664 | PNVSYIASR      | protein kinase shaggy                                     | 0,785902144 | 0,053870238 |    |
| 665 | RRDSV          | pyruvate kinase                                           | 0,748272044 | 0,19832755  |    |
| 666 | STRRSIRLP      | pleckstrin                                                | 1,882036551 | 0,732780524 |    |
| 667 | TPQVSDTMR      | glycogenin                                                | 0,550443753 | 0,100746517 |    |
| 668 | VNATYVNVK      | Receptor tyrosine kinase for hepatocyte growth factor     | 0,46486533  | 0,087037905 |    |
| 669 | RAAHSIKGG      | Chemotaxis protein cheA                                   | 0,97154331  | 0,150949302 |    |
| 670 | SPSLSRHSS      | Glycogen [starch] synthase                                | 1,150978231 | 0,457593321 |    |
| 671 | RTPPPSG        | Myelin basic protein                                      | 0,725370698 | 0,16041193  |    |

|     |                |                                                         |             |             |    |
|-----|----------------|---------------------------------------------------------|-------------|-------------|----|
| 672 | VRKRTLRL       | EGF Receptor                                            | 1,784427929 | 0,6920256   |    |
| 673 | SRKSGFGH       | gap junction beta-1 protein                             | 1,017537028 | 0,255767104 |    |
| 674 | LSGESDLEI      | DNA topoisomerase II                                    | 0,69944079  | 0,067188599 |    |
| 675 | PSQRSKYLA      | Myelin basic protein                                    | 0,453607587 | 0,019948932 |    |
| 676 | STDEYLDLS      | Receptor tyrosine kinase                                | 1,303839852 | 0,601411653 |    |
| 677 | TNHIYNLA       | Mast/stem cell growth factor receptor                   | 0,629533636 | 0,089375619 |    |
| 678 | LSRHSSPHQ      | Glycogen [starch] synthase                              | 1,177241567 | 0,147314118 | On |
| 679 | PTRHSRVAE      | Lamin                                                   | 0,571145259 | 0,199569772 |    |
| 680 | KISITSRKA      | GTP-binding protein era                                 | 1,291251607 | 0,48309278  |    |
| 681 | KSKISASRK      | troponin I                                              | 1,998445579 | 0,992117486 |    |
| 682 | KRKQISVGG      | Glycogen phosphorylase                                  | 0,933552938 | 0,219479883 |    |
| 683 | SRALSRQLS      | Heat Shock Protein 27                                   | 1,510688888 | 0,448999909 |    |
| 684 | KKKFSFKKP      | MARCKS-related protein                                  | 3,135335062 | 1,956967428 |    |
| 685 | KTRSSRAGL      | Histone H2A                                             | 2,195436088 | 0,867637197 |    |
| 686 | PAPGSPEPP      | Early E1A                                               | 0,479260619 | 0,139741905 |    |
| 687 | IGSESTEDQ      | Alpha-S1 casein                                         | 0,515443533 | 0,139094509 |    |
| 688 | MRRNSFTPL      | fructose-2,6-bisphosphatase                             | 0,633654538 | 0,08610781  |    |
| 689 | EEQEYVQTV      | Annexin I                                               | 0,505963512 | 0,139993193 |    |
| 690 | ERRVSNAGG      | vasodilator-stimulated phosphoprotein                   | 0,4830178   | 0,069285008 |    |
| 691 | IREESPPTS      | Glycoprotein IV                                         | 0,391544629 | 0,077463033 |    |
| 692 | NDSVYANWM      | Probable receptor with tyrosine-protein kinase activity | 0,660732298 | 0,128322649 |    |
| 693 | PYKFPSSPLRIPGZ |                                                         | 0,453132538 | 0,076022973 |    |
| 694 | GRRESLTSF      | inositol 1,4,5-trisphosphate-binding protein            | 0,824608235 | 0,251392743 |    |
| 695 | ARVFSVLRE      | Ser/Thr poetin phosphatase 2B                           | 0,819683478 | 0,027395705 | On |
| 696 | DLPLPSAF       | tristetraproline                                        | 0,673484    | 0,163513371 |    |
| 697 | GDKKSKKAK      | Na+/K+ ATPase 1                                         | 0,80345094  | 0,170144298 |    |
| 698 | GSDVSFNEE      | DNA topoisomerase II                                    | 0,693477315 | 0,184693748 |    |
| 699 | EEKGSPLNA      | Protein tyrosine phosphatase 1B                         | 0,463690475 | 0,062283521 |    |
| 700 | ERQKTQTKL      | myosin light chain kinase                               | 0,700108773 | 0,090730353 |    |
| 701 | RRRSSKDTS      | glutamate (NMDA) receptor subunit zeta 3                | 0,903578639 | 0,159324689 |    |
| 702 | SKAGSLGNI      |                                                         | 0,496297236 | 0,179274998 |    |
| 703 | MSGDEM         | eukaryotic translation initiation factor 2 beta         | 0,38648773  | 0,177216212 |    |
| 704 | AAATTPAAE      | neuromodulin                                            | 0,388232222 | 0,141207109 |    |
| 705 | ARKKSSAQL      | ras-related protein rap-1b                              | 0,6443643   | 0,386468805 |    |
| 706 | DKVTSPTKV      | caldesmon                                               | 0,459979146 | 0,149326678 |    |
| 707 | FRRFTPDSL      | Sodium channel protein                                  | 0,548456579 | 0,04112974  |    |
| 708 | RFTDTRKDE      | elongation factor 4                                     | 0,500719195 | 0,163620258 |    |
| 709 | RKISASEA       |                                                         | 0,50123172  | 0,258085261 |    |
| 710 | LARASLG        | pyruvate kinase                                         | 0,826268811 | 0,144041148 |    |
| 711 | RRRLSSLRA      | 40S ribosomal protein S6                                | 0,822373928 | 0,104849987 |    |
| 712 | SGYISSLEY      | Complement C1r                                          | 1,281743116 | 0,468506191 |    |
| 713 | LARNSI         | cystic fibrosis transmembrane conductance regulator     | 0,509612204 | 0,127064136 |    |
| 714 | TIAVG          | Photosystem Q(A)                                        | 0,473640964 | 0,039733711 |    |
| 715 | TADISEDEE      | phosphorylcholine transferase                           | 0,762444664 | 0,195116871 |    |
| 716 | TRQTSVSGQ      | synapsins IA and IB                                     | 0,468201813 | 0,173816141 |    |
| 717 | VSEELYDLR      | Fibroblast growth factor receptor 4                     | 1,122289892 | 0,496599043 |    |
| 718 | REQESSGEE      | Protein phosphatase inhibitor 2                         | 0,480466427 | 0,12981094  |    |
| 719 | GTKRSGSV       | phosphorylase b kinase beta                             | 1,323141961 | 0,07251519  | On |
| 720 | NRLQTMKEE      | Lamin C                                                 | 0,490035358 | 0,120133774 |    |
| 721 | VVELSGESD      | DNA topoisomerase II                                    | 0,664607965 | 0,077398648 |    |
| 722 | SRRPSRATW      | Vitronectin                                             | 2,008907734 | 0,14642772  | On |
| 723 | PASQTPNKT      | Proto-oncogene tyrosine-protein kinase Src              | 0,475738892 | 0,144456218 |    |
| 724 | QDPVSPSLV      | muscarinic acetylcholine receptor M2                    | 0,460219333 | 0,120857658 |    |
| 725 | STTVSKTET      | Rhodopsin                                               | 0,524545769 | 0,073872975 |    |
| 726 | TRKISASEF      |                                                         | 0,531675583 | 0,111554184 |    |
| 727 | PGPQSPGSP      | Neutrophil cytosol factor 4                             | 0,449137522 | 0,094301138 |    |



|     |                |                                                         |             |             |    |
|-----|----------------|---------------------------------------------------------|-------------|-------------|----|
| 728 | KQGSGRGL       | Glycogen phosphorylase                                  | 1,34296323  | 0,153992244 | On |
| 729 | KKSWSRWTL      | parathyroid hormone/parathyroid hormone-related peptide | 2,439550692 | 0,558996966 | On |
| 730 | LASSSKEEN      | Cystatin S                                              | 0,498023966 | 0,141887726 |    |
| 731 | PLRRTLVA       | glycogen synthase                                       | 0,630161499 | 0,049501359 |    |
| 732 | SRPSSNRSY      | vimentin                                                | 2,063434182 | 0,480791643 | On |
| 733 | KNDYYRKRK      | Ros proto-oncogene tyrosine kinase                      | 1,615512708 | 0,180272035 | On |
| 734 | LIEDAEYTA      | Proto-oncogene tyrosine-protein kinase Lck, Fyn, Yes    | 0,714448582 | 0,313209739 |    |
| 735 | QKAQTERKS      | troponin T                                              | 0,992856261 | 0,081221852 | On |
| 736 | ISTESQPNG      | phosphorylase b kinase alpha                            | 0,368829221 | 0,114930773 |    |
| 737 | NGNNYVYID      | Mast/stem cell growth factor receptor                   | 0,616057255 | 0,034516343 |    |
| 738 | EIKKSWSRW      | parathyroid hormone/parathyroid hormone-related peptide | 0,879564699 | 0,216064814 |    |
| 739 | ESPASDEAE      | Nonhistone chromosomal protein HMG-14                   | 0,555654848 | 0,01905445  |    |
| 740 | KRKSSQALV      | Transforming protein erbA                               | 1,513994167 | 0,68177831  |    |
| 741 | NNMPSSDDG      | muscarinic acetylcholine receptor M2                    | 0,478911917 | 0,038144374 |    |
| 742 | PYKFPSSPLRIPGZ |                                                         | 0,391643911 | 0,068408196 |    |
| 743 | GSPGTPGSR      |                                                         | 0,720844435 | 0,103392645 |    |
| 744 | AVVRTPPKS      |                                                         | 1,373537017 | 0,266169911 | On |
| 745 | DRKLSTKEA      | multidrug resistance protein 2                          | 0,49461295  | 0,055502397 |    |
| 746 | GGIRSLNVA      | isocitrate dehydrogenase                                | 0,517154238 | 0,057220728 |    |
| 747 | GTRLRLARM      | glial fibrillary acidic protein                         | 1,047529954 | 0,156161868 | On |
| 748 | EGNKSPAPK      | Actin and myosin binding protein                        | 0,477444702 | 0,068497882 |    |
| 749 | ESHESMESY      | Matrix Gla-protein                                      | 0,585661996 | 0,120819825 |    |
| 750 | RVRISADAM      | Troponin I                                              | 0,516737578 | 0,051923881 |    |
| 751 | SNDDSDDDD      | casepuestrin                                            | 0,69303391  | 0,063001602 |    |
| 752 | RRPTPA         | Protein phosphatase inhibitor 3                         | 1,260888619 | 0,154312595 | On |
| 753 | AEGSSNVFS      | Myosin regulatory light chain 2                         | 0,562531932 | 0,066780166 |    |
| 754 | AVADSESED      | cAMP-dependent protein kinase II (PKA)                  | 0,76912783  | 0,195917633 |    |
| 755 | DNPDYQQDF      | EGF Receptor                                            | 1,253389637 | 0,702947128 |    |
| 756 | GDVKYADIE      | platelet-derived growth factor receptor                 | 0,764553046 | 0,184104654 |    |
| 757 | RLQDYEEKT      | Connection of cytoskeletal structure to plasma membrane | 0,568867769 | 0,054187071 |    |
| 758 | FKKSFKL        | myristolated alanine-rich C-kinase substrate            | 1,321533693 | 0,619042312 |    |
| 759 | LRRPSLG        | pyruvate kinase                                         | 1,62326894  | 0,737652862 |    |
| 760 | RRVRSQEPG      | somatostatin receptor type 4                            | 0,831852214 | 0,175563725 |    |
| 761 | SLDDSGSAM      | alpha-1B adrenergic receptor                            | 0,554696882 | 0,110729669 |    |
| 762 | RRASVA         | pyruvate kinase                                         | 1,412068832 | 0,588127909 |    |
| 763 | ADDEYAPKQ      | Tyrosine-protein kinase Src64B                          | 0,740209397 | 0,290259718 |    |
| 764 | TESQYQQQP      | Tyrosine-protein kinase Hck                             | 0,508421868 | 0,049125871 |    |
| 765 | TVKSSKGGP      | Annexin I                                               | 0,817350118 | 0,223055401 |    |
| 766 | WTSDSAGEE      | 14-3-3 protein tau                                      | 0,923693905 | 0,315857211 |    |
| 767 | RKAASVIAK      | DNA polymerase beta                                     | 1,32173192  | 0,516984959 |    |
| 768 | LRRASLDG       | pyruvate kinase                                         | 0,828042093 | 0,439624721 |    |
| 769 | LRRASGG        | pyruvate kinase                                         | 0,896086979 | 0,24511996  |    |
| 770 | YHTTSHPGT      | Band 3 anion transport protein                          | 0,7112161   | 0,22045931  |    |
| 771 | SSEESITRI      | Beta casein                                             | 0,714219671 | 0,272077591 |    |
| 772 | PLAGSPVIA      | casein kinase II                                        | 0,796269996 | 0,023314367 | On |
| 773 | LGSPPLRRR      | vimentin                                                | 3,863673948 | 1,465924082 | On |
| 774 | TEDQYSLVE      | PI3-kinase p85-alpha                                    | 1,602744313 | 1,101572659 |    |
| 775 | TRTYSLGSA      | vimentin                                                | 0,897257547 | 0,465578072 |    |
| 776 | PPSAYATVK      | Annexin II                                              | 0,669430106 | 0,191487601 |    |
| 777 | RTKRSGSV       | phosphorylase b kinase beta                             | 2,021064788 | 0,628676997 | On |
| 778 | KREASLDNQ      | Phytochrome A                                           | 0,458153411 | 0,071416453 |    |
| 779 | LMDKYHVDN      | Early E2A                                               | 0,457676683 | 0,075614326 |    |
| 780 | QQGMTVYGL      | calponin alpha and beta                                 | 0,905861356 | 0,24226331  |    |
| 781 | SRSRSRSRS      | Lamin B receptor                                        | 3,999527814 | 1,206786712 | On |
| 782 | KRNSSPPPS      |                                                         | 1,776478611 | 0,690229947 |    |
| 783 | LQRYSSDPT      | EGF Receptor                                            | 0,599394017 | 0,137435986 |    |



|     |                |                                                          |             |             |    |
|-----|----------------|----------------------------------------------------------|-------------|-------------|----|
| 784 | QRRTSLTGS      | Volt.-dep. L-type calcium channel alpha-1S               | 1,313752943 | 0,579856192 |    |
| 785 | GVRQSRASD      | T-cell surface glycoprotein CD3 gamma                    | 0,598430713 | 0,224373384 |    |
| 786 | KRPSNRAKA      | Myelin basic protein                                     | 1,375265691 | 0,117430327 | On |
| 787 | EAVTSPRFI      | Tyrosine 3-monooxygenase                                 | 0,607838201 | 0,181330158 |    |
| 788 | EMTGYVATR      | Mitogen-activated protein kinase p38                     | 0,467771415 | 0,08432358  |    |
| 789 | HKIKSGAEA      | DNA polymerase beta                                      | 0,507633026 | 0,172230357 |    |
| 790 | LARRSTTDA      | Choriogonadotropin beta                                  | 0,447595139 | 0,222424622 |    |
| 791 | PYKFPSSPLRIPGZ |                                                          | 0,41527908  | 0,180353539 |    |
| 792 | GGTGTPNKE      | Actin and myosin binding protein                         | 0,5900031   | 0,230262078 |    |
| 793 | ALGISYGRK      | TAT protein                                              | 1,705693899 | 0,292979077 | On |
| 794 | DDSGSAMSG      | alpha-1B adrenergic receptor                             | 0,495746799 | 0,13859065  |    |
| 795 | EYVQTVKSS      | Annexin I                                                | 0,496108131 | 0,139297715 |    |
| 796 | GKTDYMGEA      | Beta-2 adrenergic receptor                               | 0,533050067 | 0,172749138 |    |
| 797 | DSTYYKASK      | Focal adhesion kinase                                    | 0,838203952 | 0,042470549 | On |
| 798 | EKEISDDEA      | Heat Shock Protein 90-beta                               | 0,548829786 | 0,233499866 |    |
| 799 | RRADSLQKN      | iron-responsive element binding protein                  | 0,650341931 | 0,214885049 |    |
| 800 | SAYGSVKAY      | Annexin II                                               | 0,573771051 | 0,12165091  |    |
| 801 | NTSSSPQPK      | p53                                                      | 0,578679688 | 0,177942449 |    |
| 802 | GSRRR          | protamine                                                | 2,430902829 | 0,110035562 | On |
| 803 | AKAKTTKKR      | Myosin regulatory light chain 2                          | 2,492817099 | 0,554320548 | On |
| 804 | DDAYSDET       | Protein phosphatase inhibitor 2                          | 1,993746434 | 0,887518424 |    |
| 805 | ESVDYVPMML     | platelet-derived growth factor receptor                  | 0,862991577 | 0,364962453 |    |
| 806 | YSTDYREG       | TrkC tyrosine kinase                                     | 1,320470885 | 0,679342189 |    |
| 807 | SPKKSPRKA      | Histone H4                                               | 1,373962344 | 0,191020358 | On |
| 808 | RKRSRKA        | Histone H2B                                              | 1,968536677 | 0,544675325 | On |
| 809 | RPPASPSQ       | synapsins IA and IB                                      | 0,655574496 | 0,277156771 |    |
| 810 | SARLSAKPA      | Nonhistone chromosomal protein HMG-14                    | 0,847589382 | 0,219938477 |    |
| 811 | NRQSSQARV      | Phytochrome A                                            | 1,442603507 | 0,173552576 | On |
| 812 | KEAKSD         | Nonhistone chromosomal protein HMG-14                    | 0,494091175 | 0,236573306 |    |
| 813 | SSSNTIRRP      | fructose-2,6-bisphosphatase                              | 2,480254692 | 0,888039503 |    |
| 814 | TKKQSFQKT      | cystic fibrosis transmembrane conductance regulator      | 1,10904062  | 0,200211205 |    |
| 815 | VDSAYEVIK      | L-lactate dehydrogenase M                                | 0,997724891 | 0,329917478 |    |
| 816 | YRKSSLKSR      | spermatid nuclear transition protein 3                   | 1,979202283 | 0,162896657 | On |
| 817 | SNVSSTGSI      |                                                          | 0,628229883 | 0,297089621 |    |
| 818 | RARSRKE        | Histone H2B                                              | 1,368611006 | 0,208819808 | On |
| 819 | VGPGYLGSG      | Probable receptor with tyrosine-protein kinase activity  | 0,440096758 | 0,156307898 |    |
| 820 | QTVKSSKGG      | Annexin I                                                | 1,054612929 | 0,058054922 | On |
| 821 | LRMFSFKAP      | Gamma-aminobutyric-acid receptor gamma-2                 | 0,916625159 | 0,085838608 | On |
| 822 | PRHLSNVSS      |                                                          | 0,513850161 | 0,322772843 |    |
| 823 | SSNEYMDMK      | Mast/stem cell growth factor receptor                    | 0,522249916 | 0,328265875 |    |
| 824 | THYGSLPQK      | Myelin basic protein                                     | 0,740384611 | 0,183563566 |    |
| 825 | LRRPSDQAV      | Transforming protein rel                                 | 0,775976395 | 0,109654968 |    |
| 826 | PRRNSRASL      | Sodium channel protein type II alpha                     | 0,576439782 | 0,165038326 |    |
| 827 | KAKTTKKRP      | Myosin regulatory light chain 2                          | 2,877087728 | 0,659284433 | On |
| 828 | KRPSGRAKA      | Myelin basic protein                                     | 2,552994151 | 0,225395214 | On |
| 829 | PLSKTSLVSSL    | Glycogen [starch] synthase                               | 0,634421092 | 0,320550976 |    |
| 830 | QSGMTEYVA      | Mitogen-activated protein kinase FUS3                    | 0,578051043 | 0,251967172 |    |
| 831 | KGATSDEED      | DNA topoisomerase II                                     | 0,575357277 | 0,235826883 |    |
| 832 | KRRNSEFEI      | tryptophan 5-monooxygenase                               | 0,796125781 | 0,070095612 |    |
| 833 | LTRRASFSQA     | Regulatory protein ADR1                                  | 1,781917058 | 0,200017655 | On |
| 834 | HRQETVEAL      | calcium/calmodulin-dependent protein kinase type II beta | 0,403643391 | 0,180608613 |    |
| 835 | LRRFSLATM      | Cytochrome P450 2B1                                      | 0,84793204  | 0,239089169 |    |
| 836 | EEEAYGWMD      | Gastrin                                                  | 0,961668227 | 0,29161498  |    |
| 837 | EQESSGEED      | Protein phosphatase inhibitor 2                          | 0,546994006 | 0,132320076 |    |
| 838 | IAADSEAEQ      | Insulin receptor substrate 7                             | 0,548153215 | 0,169533337 |    |
| 839 | MGEASGAQL      | Beta-2 adrenergic receptor                               | 0,455977972 | 0,164175515 |    |

|     |                |                                                         |             |             |    |
|-----|----------------|---------------------------------------------------------|-------------|-------------|----|
| 840 | PYKFPSSPLRIPGZ |                                                         | 0,430777528 | 0,177611695 |    |
| 841 | GNGDYMPMS      | Insulin receptor substrate 8                            | 0,40832359  | 0,132038307 |    |
| 842 | APRYPGGRR      | Myelin basic protein                                    | 1,931695919 | 0,2206965   | On |
| 843 | DGNKSPAPK      | caldesmon                                               | 0,569989281 | 0,190539383 |    |
| 844 | FMTEYVATR      | mitogen-activated protein kinase                        | 0,476241576 | 0,092538429 |    |
| 845 | GRASSHSSQ      | Lamin C                                                 | 0,939757429 | 0,110150732 | On |
| 846 | EDSTYYKAS      | Focal adhesion kinase                                   | 0,938684859 | 0,309416142 |    |
| 847 | ENPQYFRQG      | TrkC tyrosine kinase                                    | 0,460676883 | 0,181983589 |    |
| 848 | RRPTPATVA      | Protein phosphatase inhibitor 4                         | 0,964211174 | 0,202985582 |    |
| 849 | SFKLSGFSF      | myristolated alanine-rich C-kinase substrate            | 0,442258063 | 0,119972965 |    |
| 850 | QEKESERLA      | Beta-2 adrenergic receptor                              | 0,427035608 | 0,118405774 |    |
| 851 | RRVSV          | pyruvate kinase                                         | 1,479369491 | 0,176978304 | On |
| 852 | APFTPGGRR      | Myelin basic protein                                    | 1,651955179 | 0,282801152 | On |
| 853 | DEKLSEILG      | RNA polymerase alpha                                    | 0,662235355 | 0,2621676   |    |
| 854 | FGHNTIDAV      | bumetanide-sensitive sodium-(potassium)-chloride cotran | 0,509793656 | 0,191442364 |    |
| 855 | RDEEYGYEA      | Gamma-aminobutyric-acid receptor gamma-2                | 1,600512907 | 0,730419203 |    |
| 856 | AVRRSDAA       | Troponin I                                              | 0,702228145 | 0,122387003 |    |
| 857 | TKRSGSV        | phosphorylase b kinase beta                             | 1,019285828 | 0,083482886 | On |
| 858 | RRKATQVGE      | vasodilator-stimulated phosphoprotein                   | 0,439194832 | 0,112467901 |    |
| 859 | SEGDSSEGE      | Serum response factor                                   | 0,656451959 | 0,239931071 |    |
| 860 | PLDRSSHAQ      | Insulin Receptor (IR)                                   | 0,585192061 | 0,152979172 |    |
| 861 | RRASS          | pyruvate kinase                                         | 1,498971641 | 0,341749837 | On |
| 862 | STPLSPTRI      | Lamin A/C                                               | 1,019370706 | 0,323693922 |    |
| 863 | TPPLSPSRR      | Myc proto-oncogene protein                              | 2,395813651 | 0,326489655 | On |
| 864 | VKRISGLIY      | Histone H4                                              | 0,887574499 | 0,187612846 |    |
| 865 | RAAASRARQ      | cAMP response element-binding protein CRE-BP3           | 1,693403302 | 0,146507108 | On |
| 866 | SPRTPGGRR      | Myelin basic protein                                    | 2,170288263 | 0,333571948 | On |
| 867 | RRRRSVA        | pyruvate kinase                                         | 2,584564778 | 0,283572516 | On |
| 868 | VRFESIRLP      | Choriogonadotropin beta                                 | 0,86187443  | 0,22672397  |    |
| 869 | SRKESYSVY      | Histone H2B                                             | 0,664524703 | 0,192788107 |    |
| 870 | LSELSRRRI      | eukaryotic translation initiation factor 4F             | 2,562911802 | 0,087748123 | On |
| 871 | PSPSSRVTV      | Lamin B1                                                | 0,899046778 | 0,15971844  |    |
| 872 | SSVPTPSPL      | casein kinase II                                        | 0,414274194 | 0,089361965 |    |
| 873 | TNEEYLDLS      | Fibroblast growth factor receptor 2                     | 0,854671695 | 0,234849982 |    |
| 874 | LSRFSWGAE      | Myelin basic protein                                    | 0,531567705 | 0,195870425 |    |
| 875 | PTKRSPTKR      | Histone H2B.1                                           | 1,030303285 | 0,225209997 |    |
| 876 | KISASRKLQ      | troponin I                                              | 2,092246649 | 0,385518068 | On |
| 877 | KSFGSPNRI      | cell division protein kinase 7                          | 1,608452801 | 0,228584612 | On |
| 878 | KRKQISVAGL     | Glycogen phosphorylase                                  | 1,312880329 | 0,157730633 | On |
| 879 | SQHSTPPKK      | Large T antigen                                         | 0,60740108  | 0,197928584 |    |
| 880 | KKIDSFASN      | acetyl-CoA carboxylase                                  | 0,820623587 | 0,327303571 |    |
| 881 | KTETSQVAP      | Rhodopsin                                               | 0,530463978 | 0,174363733 |    |
| 882 | PAAPSPGSS      | synapsins IA and IB                                     | 0,535579824 | 0,313994271 |    |
| 883 | IGRFSEPHA      | cGMP-dependent protein kinase (PKG)                     | 0,498906125 | 0,218940107 |    |
| 884 | MQLKSEIKQ      | phosphorylase b kinase alpha                            | 0,619343201 | 0,213009397 |    |
| 885 | EEQEYIKTV      | Annexin I                                               | 0,84238604  | 0,254092417 |    |
| 886 | ERRPSNVSQ      | Sodium channel protein type II alpha                    | 0,543173505 | 0,155076448 |    |
| 887 | IPPHTPVRT      | Retinoblastoma-associated protein                       | 1,075007477 | 0,285380774 |    |
| 888 | NDSTSVAV       | muscarinic acetylcholine receptor M2                    | 0,546811506 | 0,145037473 |    |
| 889 | PYKFPSSPLRIPGZ |                                                         | 0,457715951 | 0,086571085 |    |
| 890 | GRPITPPRN      | ser/thr protein phosphatase PP1-alpha                   | 1,348609969 | 0,414281237 |    |
| 891 | ARTKRSGSV      | phosphorylase b kinase beta                             | 1,745323516 | 0,496764724 | On |
| 892 | DLPGTEDFV      | Beta-2 adrenergic receptor                              | 1,023512571 | 0,294959554 |    |
| 893 | GALYSGSEG      | Serum response factor                                   | 0,627082237 | 0,218787792 |    |
| 894 | GRVLTLP RS     | Insulin Receptor (IR)                                   | 1,533896585 | 0,394748644 | On |
| 895 | EKESSNDS       | muscarinic acetylcholine receptor M2                    | 0,482473541 | 0,046794276 |    |

|     |                |                                                          |             |             |    |
|-----|----------------|----------------------------------------------------------|-------------|-------------|----|
| 896 | ERNLSFEIK      | protein-tyrosine phosphatase G1                          | 0,480423981 | 0,128170996 |    |
| 897 | RRRRSRRAS      | Protamine Z                                              | 1,930728667 | 0,88822899  |    |
| 898 | SIYSSDDDE      | Myb proto-oncogene protein                               | 1,549573662 | 0,603678912 |    |
| 899 | HGYSLG         | Lysozyme C                                               | 0,515718211 | 0,231422457 |    |
| 900 | AAASFKAQR      |                                                          | 1,48436835  | 0,042678585 | On |
| 901 | ARKFSSARP      | Sodium channel protein                                   | 1,760601258 | 0,256896608 | On |
| 902 | DKEYYSVHN      | Receptor tyrosine kinase for hepatocyte growth factor    | 0,556700782 | 0,101381822 |    |
| 903 | FRKLSFTES      |                                                          | 0,717057071 | 0,190318162 |    |
| 904 | RFHKSSKDS      | myelin                                                   | 0,569615195 | 0,172919098 |    |
| 905 | RAKRSGSV       | phosphorylase b kinase beta                              | 1,823737917 | 0,217677991 | On |
| 906 | KSESSQK        | 40S ribosomal protein S6                                 | 0,605412083 | 0,272884051 |    |
| 907 | RRRLSDSNF      | synapsins                                                | 0,663955677 | 0,085224208 |    |
| 908 | SGKTSPSSS      | phosphorylcholine transferase                            | 0,484724455 | 0,118445243 |    |
| 909 | KSRRTI         | Interleukin-2 receptor alpha                             | 1,098313628 | 0,134960097 | On |
| 910 | TAILE          | Photosystem Q(B)                                         | 0,588888266 | 0,134738207 |    |
| 911 | SYPLSPLSD      | Cytosolic phospholipase A2                               | 0,962357104 | 0,299821473 |    |
| 912 | TRQASQAGP      | synapsins IA and IB                                      | 0,578522891 | 0,199960076 |    |
| 913 | VRVYTHEVV      | cell division control protein 2                          | 0,515962626 | 0,18168404  |    |
| 914 | RENEYMPMA      | Middle T antigen                                         | 0,466346843 | 0,109896899 |    |
| 915 | GRGLSLSR       | Myelin basic protein                                     | 1,975465286 | 0,434913574 | On |
| 916 | YIYGSFK        |                                                          | 0,86267018  | 0,124811998 |    |
| 917 | VTRSSAVRL      | vimentin                                                 | 1,468868309 | 0,313884239 | On |
| 918 | SRRLSQETG      | cystic fibrosis transmembrane conductance regulator      | 0,654792587 | 0,303570636 |    |
| 919 | PASPSPQRQ      | synapsins IA and IB                                      | 0,74693943  | 0,366945363 |    |
| 920 | PWRITDNEL      | bumetanide-sensitive sodium-(potassium)-chloride cotran: | 0,668905115 | 0,291398338 |    |
| 921 | STSVSAVAS      | muscarinic acetylcholine receptor M2                     | 0,707663243 | 0,239886127 |    |
| 922 | TRIPSAKKY      | astrocytic phosphoprotein PEA-15                         | 1,420600882 | 0,291232988 | On |
| 923 | PGGSTPVSS      | casein kinase II                                         | 0,421748348 | 0,04550504  |    |
| 924 | QGTLKIFK       | Myelin basic protein                                     | 1,349862234 | 0,328897354 |    |
| 925 | KKRLSVERI      | DNA topoisomerase II alpha                               | 1,850636557 | 0,332875599 | On |
| 926 | KYRKSSLKS      | spermatid nuclear transition protein 4                   | 1,959222488 | 0,221228892 | On |
| 927 | PLSRRLSVA      | glycogen synthase                                        | 1,006436983 | 0,403926419 |    |
| 928 | SRLHSVRER      | sucrose synthase 2                                       | 1,572346196 | 0,479680789 |    |
| 929 | KNDKSKTWQ      | eukaryotic translation initiation factor 4E              | 0,914990927 | 0,172431287 |    |
| 930 | LGGGTFDIS      | Heat Shock Protein 70                                    | 0,696949434 | 0,258554844 |    |
| 931 | QHLKSVMLQ      | Troponin I                                               | 0,693102081 | 0,077449776 |    |
| 932 | ISQESSEEE      | high mobility group protein                              | 0,623682471 | 0,108015472 |    |
| 933 | NGDASPAAA      | myristolated alanine-rich C-kinase substrate (MARCKS)    | 0,437281284 | 0,071047426 |    |
| 934 | EHVSSSEES      | Alpha-S2 casein                                          | 0,48737995  | 0,003542049 |    |
| 935 | ESMESYEVS      | Matrix Gla-protein                                       | 0,984510321 | 0,088187588 | On |
| 936 | KQLASFEIY      | Cystatin S                                               | 0,459310427 | 0,080221364 |    |
| 937 | NMPSSDDGL      | muscarinic acetylcholine receptor M2                     | 0,463873349 | 0,049383505 |    |
| 938 | PYKFPSSPLRIPGZ |                                                          | 0,402718214 | 0,038285834 |    |
| 939 | GSLKSRKRA      | spermatid nuclear transition protein 1                   | 2,065745075 | 0,681023265 |    |
| 940 | AVRRSDRAY      | Troponin I                                               | 1,067738179 | 0,179106299 | On |
| 941 | DPTMSKKKK      | eukaryotic translation initiation factor 2 beta          | 0,994959687 | 0,225209496 |    |
| 942 | GGGTSPVFP      | Desmin                                                   | 0,54818038  | 0,026762566 |    |
| 943 | GSTSTPAPS      | ATP-citrate (pro-S-) lyase                               | 0,441295851 | 0,150963531 |    |
| 944 | EGGRTVGAG      | Elongation factor Tu-A and B                             | 0,479657943 | 0,082804695 |    |
| 945 | ESHESLESY      | Matrix Gla-protein                                       | 0,76118366  | 0,260574925 |    |
| 946 | RVLESFRAA      | volatge-gated potassium channel                          | 0,888423551 | 0,105320026 |    |
| 947 | SMANSFVGT      | mitogen-activated protein kinase kinase 1                | 0,48096648  | 0,080690724 |    |
| 948 | RRPSPA         | pyruvate kinase                                          | 1,331365565 | 0,226655717 | On |
| 949 | ADSFSLNDA      | galectin-3                                               | 1,038536565 | 0,527241662 |    |
| 950 | ATSASPPQK      | p53                                                      | 0,641883987 | 0,089467993 |    |
| 951 | DNLYYWDQD      | Receptor tyrosine-protein kinase erbB-2                  | 1,079306239 | 0,679874632 |    |

|      |               |                                                 |             |             |    |
|------|---------------|-------------------------------------------------|-------------|-------------|----|
| 952  | GDSSYKNIH     | macrophage colony stimulating factor 1 receptor | 0,489824352 | 0,102889875 |    |
| 953  | RKRLSQDAY     | Neutrophil cytosol factor 6                     | 0,40739979  | 0,041992188 |    |
| 954  | ASGSFKL       | Histone H1.1                                    | 0,513062486 | 0,072496447 |    |
| 955  | LRRGSLG       | pyruvate kinase                                 | 1,683003651 | 0,488915148 |    |
| 956  | RRSVSEAAL     | hormone sensitive lipase                        | 0,574796338 | 0,114041264 |    |
| 957  | SLAMSPRQR     | Protein phosphatase inhibitor 5                 | 0,88147187  | 0,085041441 | On |
| 958  | RRASLG        |                                                 | 1,460092258 | 0,498328848 |    |
| 959  | AAVDTSEI      | Prothymosin                                     | 0,947265417 | 0,535371647 |    |
| 960  | TESQSLTLT     | Beta casein                                     | 0,512762917 | 0,038688996 |    |
| 961  | TTRVTPLRT     | Desmin                                          | 1,573940173 | 0,508589031 |    |
| 962  | WTADSGEGD     | Fibrinogen alpha                                | 1,075449952 | 0,157712961 | On |
| 963  | RHRDTGILD     | Myelin basic protein                            | 0,543669278 | 0,075194033 |    |
| 964  | NRIYTHQVV     | cell division protein kinase 7                  | 1,21069886  | 0,158067083 | On |
| 965  | LRKASLG       | pyruvate kinase                                 | 0,733470384 | 0,099619056 |    |
| 966  | YHGHSMSDP     | pyruvate dehydrogenase E1                       | 0,551727447 | 0,037872067 |    |
| 967  | SSEESIISQ     | Alpha-S2 casein                                 | 0,638256478 | 0,004807974 |    |
| 968  | PKRGSKGKD     | Myelin basic protein                            | 0,736854673 | 0,038907078 |    |
| 969  | LGSALRRR      | vimentin                                        | 4,14484953  | 1,013606039 | On |
| 970  | TDESDNEI      | lower matrix phosphoprotein                     | 1,393048405 | 0,433021934 |    |
| 971  | TRSVSSSSY     | vimentin                                        | 1,093893468 | 0,200896076 |    |
| 972  | PPRRSSIRN     | Neutrophil cytosol factor 7                     | 3,046751428 | 0,67585289  | On |
| 973  | RTKGSQSV      | phosphorylase b kinase beta                     | 1,512688892 | 0,308280653 | On |
| 974  | KRAASPRKS     | Histone H5                                      | 2,199374098 | 0,178623482 | On |
| 975  | LMAPSEEDH     | insulin-like growth factor binding protein 2    | 0,599142047 | 0,095581275 |    |
| 976  | QNPVYHNQP     | EGF Receptor                                    | 0,862212381 | 0,055890329 | On |
| 977  | SRSRSRSPG     | Lamin B receptor                                | 3,789221485 | 0,772916769 | On |
| 978  | KRKVSSAEG     | Nonhistone chromosomal protein HMG-14           | 1,484357047 | 0,003917546 | On |
| 979  | LQDDYEDMM     | Band 3 anion transport protein                  | 1,155106395 | 0,252009749 |    |
| 980  | QRRSSEGST     | Volt.-dep. L-type calcium channel alpha-1S      | 0,673689491 | 0,006750473 |    |
| 981  | GVLRRASVA     | pyruvate kinase                                 | 1,54303712  | 0,483000133 |    |
| 982  | KRPSLRAKA     | Myelin basic protein                            | 1,855804642 | 0,452271885 | On |
| 983  | EASTTVSKT     | Rhodopsin                                       | 0,646499125 | 0,351173807 |    |
| 984  | ELSNYIAMG     | Insulin receptor substrate 9                    | 0,474779676 | 0,273019169 |    |
| 985  | HHHATPSPP     | Myb proto-oncogene protein                      | 0,535877903 | 0,290166433 |    |
| 986  | KTETSQVAP     | Rhodopsin                                       | 0,484692554 | 0,246733926 |    |
| 987  | PYKFPSSPLIPGZ |                                                 | 0,596725377 | 0,064247484 |    |
| 988  | GGSVTKKRK     | Lamin C                                         | 1,85109233  | 0,466145217 | On |
| 989  | AKRISGKMA     | cell division control protein 2                 | 1,462708069 | 0,231085297 | On |
| 990  | DDPSYVNVQ     | Adaptor molecule SHC                            | 0,756724091 | 0,334771379 |    |
| 991  | EVEKSPVKS     | neurofilament triplet M                         | 0,499221532 | 0,213054983 |    |
| 992  | GKSSSYSKQ     | Fibrinogen alpha                                | 0,996888457 | 0,196079543 |    |
| 993  | DSRSSLIRK     | multidrug resistance protein 3                  | 1,004659285 | 0,265589643 |    |
| 994  | EKAKSPVPK     | neurofilament triplet M                         | 0,808171052 | 0,151366201 |    |
| 995  | RQRKSRTTI     | Interleukin-2 receptor alpha                    | 1,801359877 | 0,329955194 | On |
| 996  | SAYATVKAY     | Annexin II                                      | 0,57906834  | 0,184753696 |    |
| 997  | NTDGSTDYG     | Lysozyme C                                      | 1,430484749 | 0,845080906 |    |
| 998  | KRTLRL        | EGF Receptor                                    | 1,818717161 | 0,099897286 | On |
| 999  | AGPTSARDG     | RNA polymerase alpha                            | 0,393167898 | 0,065547278 |    |
| 1000 | DAPDPELL      | Tyrosine-protein kinase Dash/Abl                | 0,630248225 | 0,217396097 |    |
| 1001 | ESSYSYEEI     | RNA polymerase alpha                            | 1,28736988  | 0,588022635 |    |
| 1002 | YSLGSALRP     | vimentin                                        | 0,82894135  | 0,319788584 |    |
| 1003 | SPHQSEDEE     | Glycogen [starch] synthase                      | 0,578087505 | 0,336782295 |    |
| 1004 | RKRRAE        | Histone H2B                                     | 1,120791592 | 0,328536488 |    |
| 1005 | RNASTNDSP     | Beta-2 adrenergic receptor                      | 0,468128338 | 0,156181309 |    |
| 1006 | SAELYSNAL     | platelet-derived growth factor receptor         | 0,695402857 | 0,162595868 |    |
| 1007 | NRQLSSGVS     | Heat Shock Protein 28                           | 0,618152571 | 0,196671284 |    |

|      |                |                                                           |             |             |    |
|------|----------------|-----------------------------------------------------------|-------------|-------------|----|
| 1008 | VGPDS          | p53                                                       | 0,50442119  | 0,156762899 |    |
| 1009 | SSSESGAPE      | Clathrin light chain B                                    | 0,533233643 | 0,171872828 |    |
| 1010 | TKHIYNLA       | Mast/stem cell growth factor receptor                     | 0,536649934 | 0,128288228 |    |
| 1011 | VDEMYREAP      | Myosin regulatory light chain 4                           | 0,522488963 | 0,197528922 |    |
| 1012 | YRKGLSKSR      | spermatid nuclear transition protein 1                    | 0,946031292 | 0,066476958 | On |
| 1013 | SNQEYLDLS      | Receptor tyrosine kinase                                  | 0,857133958 | 0,393720413 |    |
| 1014 | RKISASE        | cGMP-specific phosphodiesterase 3a                        | 0,62538367  | 0,150747171 |    |
| 1015 | VGFMEYVA       | mitogen-activated protein kinase 1                        | 0,650645401 | 0,258765025 |    |
| 1016 | QTASSPLSP      | Lamin                                                     | 0,583422784 | 0,352192796 |    |
| 1017 | LRKVKQEE       | vasodilator-stimulated phosphoprotein                     | 0,705000477 | 0,305079073 |    |
| 1018 | PQRATSNVF      | Myosin regulatory light chain 6                           | 0,505606718 | 0,189020415 |    |
| 1019 | SSNDSTSVS      | muscarinic acetylcholine receptor M2                      | 0,524798506 | 0,274373469 |    |
| 1020 | THVASVSDV      | acetyl-CoA carboxylase                                    | 0,612144982 | 0,090440276 |    |
| 1021 | LRLSTKYR       | protein-tyrosine phosphatase G1                           | 2,299871229 | 0,292769031 | On |
| 1022 | PRRDSTEGF      | fructose-1,6-bisphosphatase                               | 0,937777801 | 0,262969698 |    |
| 1023 | KAEEYILKK      | Acetylcholine receptor protein gamma                      | 0,795842817 | 0,387983427 |    |
| 1024 | KRPSFRAKA      | Myelin basic protein                                      | 2,629592536 | 0,469296489 | On |
| 1025 | PTPSAPSPQPKG   | Tyrosine 3-monooxygenase                                  | 0,723618144 | 0,326770154 |    |
| 1026 | QRYSSDPTG      | EGF Receptor                                              | 0,467557635 | 0,131458839 |    |
| 1027 | KEDTYTAHA      | Tyrosine-protein kinase abl-1                             | 0,662853568 | 0,166217897 |    |
| 1028 | KRRLSFSET      | Interleukin-1 alpha                                       | 1,606899009 | 0,397521643 | On |
| 1029 | KRAKAKTTKRR    | Myosin regulatory light chain 2                           | 4,115754745 | 0,801014116 | On |
| 1030 | HRQETVDAL      | calcium/calmodulin-dependent protein kinase type II alpha | 0,445610106 | 0,128854906 |    |
| 1031 | LNRMSFASN      | acetyl-CoA carboxylase                                    | 0,578791621 | 0,12599302  |    |
| 1032 | EEDTYTMPS      | Focal adhesion kinase                                     | 0,69210543  | 0,253797083 |    |
| 1033 | EQEYEDPD       | Band 3 anion transport protein                            | 0,859474454 | 0,393859651 |    |
| 1034 | HVSSSEESI      | Alpha-S2 casein                                           | 0,562714214 | 0,255424573 |    |
| 1035 | METPSQRRRA     | Lamin C                                                   | 0,954442119 | 0,375628608 |    |
| 1036 | PYKFPSSPLRIPGZ |                                                           | 0,464222147 | 0,153977235 |    |
| 1037 | GNFNVEFT       | Myosin regulatory light chain 2                           | 0,971824586 | 0,247345453 |    |
| 1038 | APRTPGGRR      | Myelin basic protein                                      | 2,290735201 | 0,236458449 | On |
| 1039 | DGNGYISAA      | Calmodulin                                                | 0,6837005   | 0,126270068 |    |
| 1040 | FLTEYVATR      | extracellular signal-regulated kinase 2                   | 0,537431879 | 0,08863652  |    |
| 1041 | GRALSTRAQ      | Troponin I                                                | 1,641454308 | 0,335069627 | On |
| 1042 | EDRMSLVNS      | Cystatin S                                                | 0,48602539  | 0,170946361 |    |
| 1043 | ENPEYLGLD      | Receptor tyrosine-protein kinase erbB-2                   | 1,032742376 | 0,391086697 |    |
| 1044 | RRLSSLRAS      | 40S ribosomal protein S6                                  | 1,927287025 | 0,14300829  | On |
| 1045 | SFKKSFKLS      | myristolated alanine-rich C-kinase substrate (MARCKS)     | 2,192594513 | 0,955730875 |    |
| 1046 | PSKKYAIKG      | Glutamyl aminopeptidase                                   | 0,595743443 | 0,175519505 |    |
| 1047 | RRPSV          | pyruvate kinase                                           | 1,453467573 | 0,026334544 | On |
| 1048 | APETPGGRR      | Myelin basic protein                                      | 1,128946356 | 0,208773787 | On |
| 1049 | DEEMSETAD      | Protein phosphatase inhibitor 2                           | 0,525178167 | 0,072782336 |    |
| 1050 | FFSSSESGA      | Clathrin light chain B                                    | 0,729648814 | 0,197726751 |    |
| 1051 | RDDTYTAHA      | Tyrosine-protein kinase Dash/Abl                          | 0,576914515 | 0,136866643 |    |
| 1052 | APTPGGRR       | Myelin basic protein                                      | 1,567770405 | 0,512119672 |    |
| 1053 | STNDSPL        | Beta-2 adrenergic receptor                                | 0,6207996   | 0,17881321  |    |
| 1054 | RRKASGPPV      | Histone H1.1                                              | 1,138435889 | 0,253244348 |    |
| 1055 | SEENSKKTV      | Alpha-S2 casein                                           | 0,581210213 | 0,122894984 |    |
| 1056 | PASPSPQRQ      | synapsins IA and IB                                       | 0,701856263 | 0,092871388 |    |
| 1057 | RRASR          | pyruvate kinase                                           | 2,315701426 | 0,249967038 | On |
| 1058 | STNEYMDMK      | Mast/stem cell growth factor receptor                     | 0,541117694 | 0,15613583  |    |
| 1059 | TPPLSPIDM      | Transcription factor AP-5                                 | 0,514426825 | 0,057365544 |    |
| 1060 | VKGATSDEE      | DNA topoisomerase II                                      | 0,458123821 | 0,0440448   |    |
| 1061 | QRATSNVFA      | Myosin regulatory light chain 5                           | 0,580873372 | 0,086319974 |    |
| 1062 | SPRKSPRKS      | Histone H6                                                | 2,176277041 | 0,203012196 | On |
| 1063 | RRRASVA        | pyruvate kinase                                           | 1,894484895 | 0,225076711 | On |



|      |                |                                                         |             |             |    |
|------|----------------|---------------------------------------------------------|-------------|-------------|----|
| 1064 | VTPSPPLGP      | casein kinase II                                        | 0,615348367 | 0,130963997 |    |
| 1065 | SRKDSLDDDS     | alpha-1B adrenergic receptor                            | 0,728593074 | 0,242793853 |    |
| 1066 | LSEHSSPEE      | Dopamine- and cAMP-regulated neuronal phosphoprotein    | 0,554631721 | 0,185432175 |    |
| 1067 | PSPKYPGPQ      | Chromogranin A                                          | 0,368971707 | 0,065552717 |    |
| 1068 | SSVLYTAVQ      | platelet-derived growth factor receptor                 | 0,603732944 | 0,098069591 |    |
| 1069 | TLSDSDDED      | N-myc proto-oncogene protein                            | 0,976070187 | 0,188837856 |    |
| 1070 | LSLDSQGRN      | Beta-2 adrenergic receptor                              | 0,494047569 | 0,058792711 |    |
| 1071 | PTKRSPQKG      | Histone H2B.1                                           | 0,490274691 | 0,110478598 |    |
| 1072 | KIQASFRGH      | neurogranin                                             | 2,252075907 | 0,25827348  | On |
| 1073 | KRSNSVDTS      | Glycogen [starch] synthase                              | 0,984916159 | 0,369042287 |    |
| 1074 | KRKQISGRGL     | Glycogen phosphorylase                                  | 0,860511334 | 0,068101247 | On |
| 1075 | SQESSEEEQ      | high mobility group protein                             | 0,478196745 | 0,028401332 |    |
| 1076 | KKDVTVPKA      | Histone H1                                              | 1,305302851 | 0,253356762 | On |
| 1077 | KSRWSGSQQ      | RAF proto-oncogene ser/thr-protein kinase               | 1,750700071 | 0,206994205 | On |
| 1078 | LYSGSEGDS      | Serum response factor                                   | 0,848020672 | 0,213802017 |    |
| 1079 | IGHHSTSD       | 2-oxoisovalerate dehydrogenase alpha                    | 0,609489065 | 0,327581555 |    |
| 1080 | MPGETPPLS      | Transcription factor AP-3                               | 0,668193133 | 0,22641403  |    |
| 1081 | EEPVYEAEP      | Hematopoietic cell-specific LYN substrate               | 1,138381246 | 0,397929106 |    |
| 1082 | ERRNSILTE      | cystic fibrosis transmembrane conductance regulator     | 0,765417893 | 0,284137436 |    |
| 1083 | INETSQHHD      | vimentin                                                | 0,36539249  | 0,039524298 |    |
| 1084 | NDSNYVVKG      | Mast/stem cell growth factor receptor                   | 0,4211677   | 0,024206879 |    |
| 1085 | PYKFPSSPLRIPGZ |                                                         | 0,468482453 | 0,107198795 |    |
| 1086 | GRNASTNDS      | Beta-2 adrenergic receptor                              | 0,602282821 | 0,16821295  |    |
| 1087 | ARSGSSTYS      | parathyroid hormone/parathyroid hormone-related peptide | 1,098802408 | 0,329073282 |    |
| 1088 | DLTSPDVG       | Transcription factor AP-4                               | 0,58772669  | 0,098038278 |    |
| 1089 | GAGNSLRTA      | Lamin C                                                 | 0,822771086 | 0,173943415 |    |
| 1090 | GRTWTLAGT      | cGMP-dependent protein kinase (PKG)                     | 0,612553935 | 0,145444053 |    |
| 1091 | EEHVYSFPN      | Paxillin                                                | 0,565315992 | 0,091402186 |    |
| 1092 | ERHHSIDAQ      | phosphoenolpyruvate carboxylase                         | 0,492253778 | 0,094617537 |    |
| 1093 | RRRRAASVA      | pyruvate kinase                                         | 2,447315369 | 0,214717372 | On |
| 1094 | SIRDTPAKN      | Nucleophosmin                                           | 0,515931246 | 0,112894708 |    |
| 1095 | GGYSLG         | Lysozyme C                                              | 0,618295473 | 0,181432171 |    |
| 1096 | AAASFKAKK      |                                                         | 1,215237576 | 0,218971905 | On |
| 1097 | ARDIYKNDY      | Ros proto-oncogene tyrosine kinase                      | 0,723308681 | 0,104211518 |    |
| 1098 | DKEVSDDEA      | HSP90-alpha                                             | 0,596793317 | 0,148110116 |    |
| 1099 | FRKFTKSER      | cGMP-dependent protein kinase (PKG)                     | 2,170758411 | 0,302884715 | On |
| 1100 | RFFGSDRGA      | Myelin basic protein                                    | 1,025043128 | 0,366314071 |    |
| 1101 | PRTPGGRR       | Myelin basic protein                                    | 1,170023662 | 0,080466172 | On |
| 1102 | KRRVSEV        | Erythrodihydroneopterin triphosphate synthetase         | 1,015986655 | 0,530632861 |    |
| 1103 | RRRGSSIPQ      | 6-phosphofructo-2-kinase/fructose-2,6-bisphosphatase    | 1,276437861 | 0,220318619 | On |
| 1104 | SGDTPRHL       | Microtubule-associated protein tau                      | 0,502949731 | 0,091094403 |    |
| 1105 | KQITVR         | Glycogen phosphorylase                                  | 1,379523832 | 0,175214781 | On |
| 1106 | SSKRA          | Myosin regulatory light chain 2                         | 1,512561743 | 0,094568213 | On |
| 1107 | SVSSSSYRR      | vimentin                                                | 3,077566952 | 0,736554128 | On |
| 1108 | TRQASISGP      | synapsins                                               | 0,780177431 | 0,103231142 |    |
| 1109 | VRTYTHEVV      | Cell division protein kinase 2                          | 0,520906604 | 0,058994303 |    |
| 1110 | REILSRRPS      | cAMP response element binding protein                   | 2,299099324 | 0,661517139 | On |
| 1111 | GASGSFKL       | Histone H1.1                                            | 0,553671044 | 0,122262423 |    |
| 1112 | VRRSDRA        | Troponin I                                              | 1,250669389 | 0,245083643 | On |
| 1113 | VTRRTLSDM      | 6-phosphofructokinase                                   | 1,181994348 | 0,422026921 |    |
| 1114 | SRRGSESE       | phosphoprotein phosphatase 1, 3a                        | 0,991977559 | 0,098526183 | On |
| 1115 | PASAYGSVK      | Annexin II                                              | 0,546047201 | 0,087908079 |    |
| 1116 | PWQVSLRTR      | Plasminogen                                             | 0,527067219 | 0,107445872 |    |
| 1117 | STSRSLYSS      | vimentin                                                | 1,97867098  | 0,842672356 |    |
| 1118 | TRGGSLERS      | alpha-1B adrenergic receptor                            | 0,774295111 | 0,107595161 |    |
| 1119 | PFKLSGLSF      | MARCKS-related protein                                  | 0,527413826 | 0,042582199 |    |



|      |                |                                                       |             |             |    |
|------|----------------|-------------------------------------------------------|-------------|-------------|----|
| 1120 | QEQEYVQAV      | Annexin I                                             | 0,713771202 | 0,242184631 |    |
| 1121 | KKRFSFKKS      | myristolated alanine-rich C-kinase substrate (MARCKS) | 3,617049659 | 1,159754209 | On |
| 1122 | KYLASASTM      | Myelin basic protein                                  | 0,858279352 | 0,098846042 |    |
| 1123 | PRRVSRRRR      | Protamine YII                                         | 0,562505305 | 0,085732783 |    |
| 1124 | SRKRSGEAT      | 6-phosphofructokinase                                 | 0,553730016 | 0,0647189   |    |
| 1125 | KMKDSDSEE      | Calmodulin                                            | 0,602868001 | 0,130519019 |    |
| 1126 | LFRLSEHSS      | Dopamine- and cAMP-regulated neuronal phosphoprotein  | 0,42892054  | 0,00953717  |    |
| 1127 | QDENTVSTS      | muscarinic acetylcholine receptor M2                  | 0,511790105 | 0,128876373 |    |
| 1128 | ISITSRKAQ      | GTP-binding protein era                               | 0,801463556 | 0,199663081 |    |
| 1129 | NFLKTSAGS      | Carbon catabolite derepressing protein kinase         | 0,556307475 | 0,101143173 |    |
| 1130 | EHIPYTHMN      | Insulin Receptor (IR)                                 | 0,745207347 | 0,129837264 |    |
| 1131 | ESMESYELN      | Matrix Gla-protein                                    | 1,224620416 | 0,121595363 | On |
| 1132 | KKRFSFKKS      | myristolated alanine-rich C-kinase substrate (MARCKS) | 3,729227304 | 2,063544019 |    |
| 1133 | NKQGYKARQ      | Protein kinase C delta                                | 1,241301304 | 0,14073073  | On |
| 1134 | PYKFPSSPLRIPGZ |                                                       | 0,494685554 | 0,10186008  |    |
| 1135 | GSSTSSRPS      | vimentin                                              | 0,79561062  | 0,186816607 |    |
| 1136 | AVMVSHYIH      | Prolactin                                             | 1,276720883 | 0,13849994  | On |
| 1137 | DPPGTESFV      | Beta-2 adrenergic receptor                            | 1,204326812 | 0,09740182  | On |
| 1138 | GFKRSYEEH      | Insulin Receptor (IR)                                 | 0,73679223  | 0,097069406 |    |
| 1139 | GSRRRRRRY      | protamine                                             | 2,435064137 | 0,635887432 | On |
| 1140 | EFPLSPPKK      | stathmin                                              | 0,930835086 | 0,04995608  | On |
| 1141 | ESEKTKTKE      | myosin II heavy chain                                 | 0,572795389 | 0,019606052 |    |
| 1142 | RSSMSGLHL      | acetyl-CoA carboxylase                                | 1,095202278 | 0,236429199 |    |
| 1143 | SLVNSRAQE      | Cystatin S                                            | 0,60435961  | 0,060623871 |    |
| 1144 | RRATVA         | pyruvate kinase                                       | 1,578138663 | 0,127993638 | On |
| 1145 | ADSFSLHDA      | galectin-3                                            | 0,963570117 | 0,241046144 |    |
| 1146 | ATRRSYVSS      | glial fibrillary acidic protein                       | 1,855973271 | 0,427656209 | On |
| 1147 | DNIDSQGRN      | Beta-2 adrenergic receptor                            | 0,698579847 | 0,023609026 |    |
| 1148 | GDSSEGESE      | Serum response factor                                 | 0,807007186 | 0,268993871 |    |
| 1149 | RKRKSSQAL      | Thyroid hormone receptor alpha                        | 1,4030395   | 0,156046099 | On |
| 1150 | AKRSRKE        | Histone H2B                                           | 1,17626951  | 0,311627663 |    |
| 1151 | LRRATLG        | pyruvate kinase                                       | 1,586454341 | 0,275890531 | On |
| 1152 | RRSSSVGYI      | Acetylcholine receptor protein delta                  | 1,683028234 | 0,145778695 | On |
| 1153 | SKVTSKAGS      |                                                       | 1,078939312 | 0,049958853 | On |
| 1154 | RGYSLG         | Lysozyme C                                            | 1,243937815 | 0,108342465 | On |
| 1155 | AARTPGGRR      | Myelin basic protein                                  | 2,036463188 | 0,194686878 | On |
| 1156 | TEPQYQPGE      | Proto-oncogene tyrosine-protein kinase Fyn            | 0,693887005 | 0,06566187  |    |
| 1157 | TTRRSASKT      | Fibrinogen alpha                                      | 1,895134748 | 0,461985529 | On |
| 1158 | WLTKTPEGN      | Actin and myosin binding protein                      | 0,556805303 | 0,076811093 |    |
| 1159 | RGRSSVYSA      | myosin heavy chain                                    | 1,245659898 | 0,747234775 |    |
| 1160 | RKRTLRRRL      | EGF Receptor                                          | 2,006067671 | 0,340671547 | On |
| 1161 | LRHASLG        | pyruvate kinase                                       | 0,757099079 | 0,120285349 |    |
| 1162 | YNGYSSNS       | Beta-2 adrenergic receptor                            | 1,09979922  | 0,08739682  | On |
| 1163 | SRTPSLPTP      | Microtubule-associated protein tau                    | 0,630979138 | 0,084339593 |    |
| 1164 | PKKGSKKAV      | Histone H2B                                           | 0,831329185 | 0,158020288 |    |
| 1165 | LELSDDDD       | Myosin heavy chain, nonmuscle type B                  | 1,062051281 | 0,364859094 |    |
| 1166 | TDDGYMPMS      | Insulin receptor substrate 10                         | 0,915181132 | 0,019697723 | On |
| 1167 | TRRLTGFLP      | Glycogen phosphorylase                                | 1,348494714 | 0,223316882 | On |
| 1168 | PPEKTEEEE      | somatostatin receptor type 5                          | 0,709055581 | 0,123574313 |    |
| 1169 | RTGRSGSV       | phosphorylase b kinase beta                           | 2,603580083 | 0,366564032 | On |
| 1170 | KQSPSSSPT      | phosphorylcholine transferase                         | 0,603087316 | 0,167827488 |    |
| 1171 | LLRPSRRVR      | somatostatin receptor type 6                          | 2,342894414 | 0,87469511  |    |
| 1172 | QMALTPVVV      | cell division protein kinase 4                        | 0,802960591 | 0,142742225 |    |
| 1173 | SRSRSPGRP      | Lamin B receptor                                      | 3,353196237 | 0,817111316 | On |
| 1174 | KRKRSRKES      | Histone H2B                                           | 2,578288937 | 0,864036835 | On |
| 1175 | LQAISPKQS      | phosphorylcholine transferase                         | 0,806881039 | 0,11768322  |    |

|      |           |                                            |             |             |  |
|------|-----------|--------------------------------------------|-------------|-------------|--|
| 1176 | QRRRSLEPP | Proto-oncogene tyrosine-protein kinase Src | 0,826157851 | 0,171892368 |  |
|------|-----------|--------------------------------------------|-------------|-------------|--|

**Suppl. Table 3. Average densitometry values for all substrates on the arrays for iNK cells and their Markov test of significance.**

| Peptide # | Sequence       | Source protein                                          | $\sum(x_1, x_2, \dots, x_9)/n$ | $\sigma(x_1, x_2, \dots, x_9)$ | Markov state |
|-----------|----------------|---------------------------------------------------------|--------------------------------|--------------------------------|--------------|
| 1         | HEYIYDPM       | platelet-derived growth factor receptor                 | 0,932250809                    | 0,084319475                    |              |
| 2         | KRPSVRAKA      | Myelin basic protein                                    | 2,076872119                    | 0,161884968                    | On           |
| 3         | EDNEYTARQ      | Tyrosine-protein kinase transforming protein SRC        | 0,909350363                    | 0,164947446                    |              |
| 4         | ENKLYGMSD      | Probable receptor with tyrosine-protein kinase activity | 0,633177204                    | 0,142517709                    |              |
| 5         | HRLLTLDPV      | Interleukin-1 receptor                                  | 0,736500523                    | 0,083432416                    |              |
| 6         | LEKKYVRRD      | macrophage colony stimulating factor 1 receptor         | 0,618277676                    | 0,077554251                    |              |
| 7         | PYKFPSSPLRIPGZ |                                                         | 0,568414111                    | 0,075711753                    |              |
| 8         | GKRQTEREK      | Troponin T                                              | 0,915895033                    | 0,082786764                    |              |
| 9         | APATSPKAE      | neuromodulin (GAP43)                                    | 0,625655911                    | 0,136900726                    |              |
| 10        | DEESEQGA       | tubulin                                                 | 0,81210812                     | 0,132957462                    |              |
| 11        | FFRRSKIAV      | glutamate receptor 2                                    | 0,91661274                     | 0,10428499                     |              |
| 12        | GMTEYVATR      | Mitogen-activated protein kinase FUS3                   | 0,651740196                    | 0,028644717                    |              |
| 13        | EAALYKNLL      | Mast/stem cell growth factor receptor                   | 0,611686771                    | 0,067471394                    |              |
| 14        | ELILSPRSK      | stathmin                                                | 1,034524183                    | 0,283648045                    |              |
| 15        | RRAVSEQDA      | Tyrosine 3-monooxygenase                                | 0,479594326                    | 0,055331132                    |              |
| 16        | SEDNSEDEI      | acetyl-CoA carboxylase                                  | 0,815978206                    | 0,054832585                    |              |
| 17        | PASLSRAKA      | phosphorylcholine transferase                           | 1,143798035                    | 0,02848754                     | On           |
| 18        | RRASL          | pyruvate kinase                                         | 1,525332488                    | 0,488369026                    |              |
| 19        | AKKMSTYNV      | myosin heavy chain                                      | 1,38646111                     | 0,395191544                    |              |
| 20        | DDINSYEAW      | Coagulation factor IX                                   | 1,237711545                    | 0,420421391                    |              |
| 21        | ETRFDTTRK      | elongation factor 2                                     | 1,113080994                    | 0,231159023                    |              |
| 22        | QLSTSEENS      | Alpha-S2 casein                                         | 0,575069381                    | 0,027654145                    |              |
| 23        | SPRKSPKKS      | Histone H1                                              | 1,704724973                    | 0,35858978                     |              |
| 24        | RRKASGP        | Histone H1.1                                            | 1,398196695                    | 0,142193698                    | On           |
| 25        | RQLRSPRRT      | ras-related protein Rab-4A                              | 2,616556865                    | 0,315254784                    | On           |
| 26        | SAVASNMRD      | muscarinic acetylcholine receptor M2                    | 0,667442648                    | 0,039905602                    |              |
| 27        | RTPPPSG        | Myelin basic protein                                    | 0,737407542                    | 0,088685539                    |              |
| 28        | LRRAS          | Red cell/liver pyruvate kinase                          | 1,246221787                    | 0,099696996                    |              |
| 29        | SSTGSIDMV      | Microtubule-associated protein tau                      | 0,558785482                    | 0,079728959                    |              |
| 30        | TLASSFKRR      | glutamate (NMDA) receptor subunit zeta 1                | 2,176051956                    | 0,371438668                    | On           |
| 31        | VGAFSTVKG      | rhodopsin kinase                                        | 1,013740021                    | 0,185165215                    |              |
| 32        | YSGHMSMDP      | pyruvate dehydrogenase E1                               | 0,642552706                    | 0,050789794                    |              |
| 33        | SPGEYVNIE      | Insulin receptor substrate 1                            | 0,714371371                    | 0,124846286                    |              |
| 34        | RKRSAKE        | Histone H2B                                             | 1,626893625                    | 0,241100657                    | On           |
| 35        | VINETSQHH      | vimentin                                                | 0,647290773                    | 0,016243161                    |              |
| 36        | SPVVSGDTS      | Microtubule-associated protein tau                      | 0,519227139                    | 0,081527175                    |              |
| 37        | LRRFSLATM      | Cytochrome P450 2B1                                     | 1,563739321                    | 0,092796321                    | On           |
| 38        | PRPASVPPS      | Glycogen [starch] synthase                              | 0,831963196                    | 0,155003547                    |              |
| 39        | SSRPSSNRS      | vimentin                                                | 1,521491118                    | 0,125508909                    | On           |
| 40        | TKFASDDEH      | Lupus La protein                                        | 0,675520766                    | 0,040239088                    |              |
| 41        | LSDDSFIED      | DNA topoisomerase II                                    | 1,139610937                    | 0,105758124                    |              |
| 42        | PSPKTPPGS      | Microtubule-associated protein tau                      | 0,736805737                    | 0,058197442                    |              |
| 43        | KDIGSESTE      | Alpha-S1 casein                                         | 0,742220267                    | 0,040787524                    |              |
| 44        | KRRGSVPIL      | erythrocyte protein 4.2                                 | 2,361317662                    | 0,41753872                     | On           |
| 45        | KRAKAKTAKKR    | Myosin regulatory light chain 2                         | 3,945174124                    | 0,823707289                    | On           |
| 46        | QSYSSQRV       | Desmin                                                  | 0,937423063                    | 0,101262913                    |              |
| 47        | KGTGYIKTE      | Signal Transducer and Activator of Transcription 1      | 1,193200327                    | 0,060758051                    | On           |
| 48        | KRSLSEMEI      | Serum response factor                                   | 0,650048617                    | 0,023685383                    |              |
| 49        | KRKQGSVRGL     | Glycogen phosphorylase                                  | 2,067908736                    | 0,611471357                    |              |
| 50        | HTRDSEAQR      | erythrocyte band 7                                      | 0,617313885                    | 0,126511075                    |              |
| 51        | MAEVSWKVL      | Phosphorylase b kinase beta                             | 0,658475809                    | 0,100857729                    |              |
| 52        | EEGISQESS      | high mobility group protein                             | 0,646909999                    | 0,083639387                    |              |
| 53        | EQQQTEDEL      | Beta casein                                             | 0,652347401                    | 0,1602044                      |              |
| 54        | IGEGTYGVV      | Cell division protein kinase 2                          | 0,763717136                    | 0,125652031                    |              |
| 55        | MMPYVVTR       | Stress-activated protein kinase JNK1                    | 0,873981337                    | 0,114086609                    |              |

|     |                |                                                         |             |             |    |
|-----|----------------|---------------------------------------------------------|-------------|-------------|----|
| 56  | PYKFPSSPLRIPGZ |                                                         | 0,67545293  | 0,111227024 |    |
| 57  | GQEVYVKKT      | PTK receptor for angiotensin 1 (TEK)                    | 0,947293683 | 0,351643566 |    |
| 58  | AQETSGEEI      | insulin-like growth factor binding protein 1            | 0,674089178 | 0,158935995 |    |
| 59  | DKAKSRPSL      | fructose-1,6-bisphosphatase                             | 0,913610075 | 0,297387161 |    |
| 60  | FPVSYSSSG      | Probable receptor with tyrosine-protein kinase activity | 0,540114796 | 0,100218874 |    |
| 61  | GRLSSMAMI      | myosin light chain kinase                               | 0,922522887 | 0,248920162 |    |
| 62  | EEDLSDENI      | transcription factor BAF1                               | 0,701453177 | 0,13001713  |    |
| 63  | EPGPYAQPS      | Proto-oncogene C-crk                                    | 0,693004431 | 0,077792006 |    |
| 64  | RRRASQLKV      | Gamma-aminobutyric-acid receptor beta                   | 0,845133092 | 0,290799221 |    |
| 65  | SGADYPDEL      | Trypsin I                                               | 0,995389995 | 0,397963937 |    |
| 66  | KQISVR         | Glycogen phosphorylase                                  | 1,529000361 | 0,632441679 |    |
| 67  | SLKDH          | L-lactate dehydrogenase M                               | 0,572808818 | 0,182341579 |    |
| 68  | APRTAGGRR      | Myelin basic protein                                    | 1,95762479  | 0,595203417 |    |
| 69  | DGHEYIYVD      | platelet-derived growth factor receptor                 | 0,748627172 | 0,190213159 |    |
| 70  | FKRSYEEHI      | Insulin Receptor (IR)                                   | 0,650404286 | 0,117762952 |    |
| 71  | REARSRAST      | cAMP-dependent protein kinase II (PKA)                  | 1,300194053 | 0,268446221 |    |
| 72  | DRVYVHPF       | Angiotensinogen                                         | 0,795725954 | 0,208529369 |    |
| 73  | VRRSDAA        | Troponin I                                              | 0,678744482 | 0,192849776 |    |
| 74  | RRKMSRGLP      | Volt.-dep. L-type calcium channel alpha-1S              | 1,237003946 | 0,582514727 |    |
| 75  | SEVPYREVQ      | Tyrosine-protein kinase Src64B (hom MAP3K10)            | 0,805515854 | 0,302785986 |    |
| 76  | PRRASATSS      | Glycogen [starch] synthase                              | 1,024352634 | 0,274148573 |    |
| 77  | RRLSI          | phosphorylase b kinase alpha                            | 1,762816175 | 0,59245513  |    |
| 78  | STLSLSPFYL     | Alpha crystallin B                                      | 0,727268537 | 0,13173379  |    |
| 79  | TRDIYETDY      | Insulin Receptor (IR)                                   | 1,019360001 | 0,262831679 |    |
| 80  | VPTLSTFRT      | Desmin                                                  | 0,9924032   | 0,228058386 |    |
| 81  | RASTSKSES      | 40S ribosomal protein S6                                | 0,730135342 | 0,102665027 |    |
| 82  | SPSSSPTHE      | phosphorylcholine transferase                           | 0,580946913 | 0,152536    |    |
| 83  | STNDSL         | Beta-2 adrenergic receptor                              | 0,796956453 | 0,220753559 |    |
| 84  | VRTFTHEVV      | Cell division protein kinase 2                          | 0,94976965  | 0,279676234 |    |
| 85  | SRKMSVQEY      | phosducin                                               | 0,83730559  | 0,047282688 |    |
| 86  | LSGLSFKRN      | MARCKS-related protein                                  | 1,531707451 | 0,670460249 |    |
| 87  | PTGTPQQRK      | Kinesin-related motor protein Eg5                       | 0,665511735 | 0,11047479  |    |
| 88  | STLASSFKR      | glutamate (NMDA) receptor subunit zeta 2                | 1,558175207 | 0,642938603 |    |
| 89  | TPPKSPSSA      | Microtubule-associated protein tau                      | 0,616779784 | 0,151941626 |    |
| 90  | PAAVSEHGD      | Na+/K+ ATPase 1                                         | 0,625876665 | 0,131052142 |    |
| 91  | PVSPSLVQG      | muscarinic acetylcholine receptor M2                    | 0,770759896 | 0,130541543 |    |
| 92  | KKDASDDLD      | eukaryotic translation initiation factor 2 beta         | 0,84537517  | 0,03030508  |    |
| 93  | KSRPSLPLP      | fructose-1,6-bisphosphatase                             | 1,201263904 | 0,408493648 |    |
| 94  | LSVSSLPGL      | Glycogen [starch] synthase                              | 0,650455835 | 0,131072897 |    |
| 95  | SRHSSPHQS      | Glycogen [starch] synthase                              | 0,905654159 | 0,156887695 |    |
| 96  | KKPPTPPPE      | Large T antigen                                         | 0,891959034 | 0,214264025 |    |
| 97  | KVPQTPLHT      | MAP kinase-activated protein kinase 2                   | 1,23329448  | 0,359775754 |    |
| 98  | PRRSSIRNA      | Neutrophil cytosol factor 1, p47-PHOX                   | 0,860026861 | 0,209413536 |    |
| 99  | ILDTTGQEE      | K-Ras                                                   | 1,114316413 | 0,176674471 |    |
| 100 | NDSNYIVKG      | Macrophage colony stimulating factor I receptor         | 0,734983764 | 0,043829121 |    |
| 101 | EFLRTSAGS      | 5'-AMP-activated protein kinase                         | 0,614341666 | 0,123443845 |    |
| 102 | ERTNSLPPV      | Volt.-dep. L-type calcium channel alpha-1S              | 0,582262822 | 0,058090891 |    |
| 103 | IRRASTIEM      | Cardiac phospholamban                                   | 0,975598821 | 0,178054735 |    |
| 104 | NFDDYMKSL      | Fatty acid-binding protein                              | 0,872869002 | 0,103780119 |    |
| 105 | PYKFPSSPLRIPGZ |                                                         | 0,68881072  | 0,043201244 |    |
| 106 | GRTGRRNSI      |                                                         | 4,188329546 | 0,263236237 | On |
| 107 | ATPIYLDIL      | TrkC tyrosine kinase                                    | 1,012980818 | 0,108936418 |    |
| 108 | DMRQTVAVG      | elongation factor 1-alpha 1                             | 0,561094881 | 0,103200378 |    |
| 109 | GDRFTDEEV      | Myosin regulatory light chain 2                         | 1,239975189 | 0,327398547 |    |
| 110 | GSGSSVTSR      | Desmin                                                  | 0,906750774 | 0,218776274 |    |
| 111 | EEPQYEEIP      | Middle T antigen                                        | 1,282546904 | 0,126895842 |    |

|     |                |                                                         |             |             |    |
|-----|----------------|---------------------------------------------------------|-------------|-------------|----|
| 112 | ERRLSLVPD      | cystic fibrosis transmembrane conductance regulator     | 0,77994834  | 0,065176329 |    |
| 113 | RRSSSRPIR      | Protamine YI                                            | 2,509083385 | 0,426559811 | On |
| 114 | SKIGSTENL      | Microtubule-associated protein tau                      | 0,767483824 | 0,135426701 |    |
| 115 | NDMTSL         | Tropomyosin 1 alpha                                     | 0,682820016 | 0,126232166 |    |
| 116 | AARLSLTDP      | platelet glycoprotein IB                                | 0,66111442  | 0,052816942 |    |
| 117 | ARRSTTDAG      | Choriogonadotropin beta                                 | 0,616539193 | 0,085486704 |    |
| 118 | DLKDTKYKL      | myosin II heavy chain                                   | 0,742221982 | 0,10944445  |    |
| 119 | GAFSTVKGV      | rhodopsin kinase                                        | 1,069589542 | 0,160779257 |    |
| 120 | RGRASSHSS      | Lamin A/C                                               | 1,792433297 | 0,244248284 | On |
| 121 | RKRSRAEF       | Histone H2B                                             | 1,338978168 | 0,028515665 | On |
| 122 | LRAASLG        | Red cell/liver pyruvate kinase                          | 1,22362688  | 0,05224961  | On |
| 123 | RRRQSVLNL      | cystic fibrosis transmembrane conductance regulator     | 1,853637045 | 0,262557424 | On |
| 124 | SIDEYFSEQ      | Interferon receptor                                     | 0,964232428 | 0,104163174 |    |
| 125 | EESESD         | synaptic vesicle amine transporter                      | 1,024270508 | 0,193008478 |    |
| 126 | RRRS           | Troponin I                                              | 3,137742494 | 0,149202885 | On |
| 127 | TAYGTRRHL      | calponin alpha and beta                                 | 2,806916955 | 0,108603742 | On |
| 128 | TRRISQTSQ      | ryanodine receptor                                      | 1,597409538 | 0,070817722 | On |
| 129 | VTPRTPPPS      | Myelin basic protein                                    | 0,815091002 | 0,115749011 |    |
| 130 | REVSSLKSK      | myosin heavy chain                                      | 1,30519649  | 0,09518013  | On |
| 131 | PEETQTQD       | HSP90-alpha                                             | 0,780417503 | 0,094870811 |    |
| 132 | KKQISVR        | Glycogen phosphorylase                                  | 1,753603015 | 0,290545253 | On |
| 133 | WLTKSPDGN      | caldesmon                                               | 0,795894811 | 0,057308546 |    |
| 134 | SRRSSLGSL      | Volt.-dep. L-type calcium channel alpha-1S              | 2,334790333 | 0,347080071 | On |
| 135 | PETVYEVAG      | Cortactin                                               | 1,302030007 | 0,187380186 |    |
| 136 | QEPGSGPPE      | somatostatin receptor type 3                            | 0,628453486 | 0,022225843 |    |
| 137 | SVSSSPIKE      | transcriptional factor SWI5                             | 0,752441627 | 0,09130951  |    |
| 138 | TRLHSLRER      | Sucrose synthase 1                                      | 2,124150755 | 0,179479796 | On |
| 139 | PKEVYDVML      | TrkC tyrosine kinase                                    | 0,876770531 | 0,223000492 |    |
| 140 | PRTPGGRR       | Myelin basic protein                                    | 2,813029149 | 0,638161854 | On |
| 141 | KLSPSPSSR      | Lamin B1                                                | 1,548538764 | 0,10327768  | On |
| 142 | LEKKYVRRD      | macrophage colony stimulating factor 1 receptor         | 1,607596318 | 0,378615342 |    |
| 143 | QASSTPLSP      | Lamin A/C                                               | 0,762651517 | 0,126169896 |    |
| 144 | SRRDSLFP       | Sodium channel protein type II alpha                    | 0,9513793   | 0,13505479  |    |
| 145 | KQPIYVME       | Tyrosine-protein kinase transforming protein Fps        | 1,004629029 | 0,102721867 |    |
| 146 | LLQDSVDFS      | vimentin                                                | 1,087441127 | 0,227872901 |    |
| 147 | QLSTSEENS      | Alpha-S2 casein                                         | 0,886396443 | 0,080405687 |    |
| 148 | KIQASFRGH      | neurogranin                                             | 2,831706221 | 0,563737283 | On |
| 149 | NKGASQAGM      | calponin alpha and beta                                 | 0,967944516 | 0,142558098 |    |
| 150 | EIVESLSSS      | Beta casein                                             | 0,636689071 | 0,043398151 |    |
| 151 | ESSNYMAPY      | platelet-derived growth factor receptor                 | 0,737366807 | 0,119543046 |    |
| 152 | KRPSKRAKA      | Myelin basic protein                                    | 1,479796174 | 0,355291492 |    |
| 153 | NRAITARRQ      | Troponin I                                              | 1,772407058 | 0,243688182 | On |
| 154 | PYKFPSSPLRIPGZ |                                                         | 0,667514353 | 0,20703501  |    |
| 155 | GSRPSESNG      | Lens fiber major intrinsic protein                      | 0,714931274 | 0,051070903 |    |
| 156 | DAHKSKRQH      | transcription factor BAF1                               | 1,060920492 | 0,071934457 |    |
| 157 | DSLIYDDGL      | Probable receptor with tyrosine-protein kinase activity | 1,094145946 | 0,158233083 |    |
| 158 | GGRDSRSGS      | Myelin basic protein                                    | 0,832693714 | 0,225399079 |    |
| 159 | GVERSVRPT      | phosphorylase b kinase alpha                            | 1,015338865 | 0,248945648 |    |
| 160 | EGVKSDQAE      | neurofilament triplet M                                 | 0,643345756 | 0,175099612 |    |
| 161 | ESLSSSEES      | Beta casein                                             | 0,65388742  | 0,231775521 |    |
| 162 | RVRMSADAM      | Troponin I                                              | 0,749344688 | 0,113037518 |    |
| 163 | SNPTYSVMR      | Middle T antigen                                        | 1,786459452 | 0,364583625 |    |
| 164 | SSKRAK         | Myosin regulatory light chain 2                         | 1,515170348 | 0,277093682 |    |
| 165 | AGDGSDEEV      | myosin heavy chain                                      | 0,971070777 | 0,153828526 |    |
| 166 | AVDRYIAIT      | Beta-2 adrenergic receptor                              | 0,703774476 | 0,135198208 |    |
| 167 | DPLLTFRFP      | Lamin A/C                                               | 0,7129217   | 0,166130423 |    |



|     |               |                                                  |             |             |    |
|-----|---------------|--------------------------------------------------|-------------|-------------|----|
| 168 | GENIYIRHS     | erythrocyte protein 4.1                          | 1,046644823 | 0,411251611 |    |
| 169 | RLSPSPTSQ     | Lamin C                                          | 0,820433656 | 0,147000242 |    |
| 170 | RKESYSV       | Histone H2B                                      | 0,96813025  | 0,176468495 |    |
| 171 | PLSRTL        | Glycogen [starch] synthase                       | 0,779410835 | 0,129056557 |    |
| 172 | RSRASTPPA     | cAMP-dependent protein kinase II (PKA)           | 1,018123781 | 0,273536987 |    |
| 173 | SLSSSEESI     | Beta casein                                      | 0,995554426 | 0,284818859 |    |
| 174 | LRRASLAG      | Red cell/liver pyruvate kinase                   | 1,596180778 | 0,405250963 |    |
| 175 | ADSESEDEE     | cAMP-dependent protein kinase II (PKA)           | 1,256245736 | 0,337261465 |    |
| 176 | THERSPSPS     | phosphorylcholine transferase                    | 0,776235117 | 0,022553736 |    |
| 177 | TVTRSYSRV     | Lamin A/C                                        | 2,782705461 | 0,178585135 | On |
| 178 | YETDYRKG      | Insulin Receptor (IR)                            | 1,169643626 | 0,201951809 |    |
| 179 | RKQISVRGL     | Glycogen phosphorylase                           | 1,623685562 | 0,245580697 | On |
| 180 | AGTTYAL       | myosin heavy chain IA (fragment)                 | 0,74525004  | 0,127142863 |    |
| 181 | LRRASVA       | pyruvate kinase                                  | 1,373373548 | 0,352721165 |    |
| 182 | YRGYSLGNW     | Lysozyme C                                       | 0,722382925 | 0,207510771 |    |
| 183 | SSLKSRKRA     | spermatid nuclear transition protein 1           | 2,433306573 | 0,660561843 |    |
| 184 | PMRRSVSEA     | hormone sensitive lipase                         | 0,897632072 | 0,046060502 |    |
| 185 | RSKRSGSV      | phosphorylase b kinase beta                      | 2,937395437 | 0,31696559  | On |
| 186 | TEGQYQQQP     | Proto-oncogene tyrosine-protein kinase Lck       | 0,880063648 | 0,127924347 |    |
| 187 | TTPLSPTRL     | Lamin B2                                         | 1,233629217 | 0,095395817 |    |
| 188 | PQPEYVNQP     | Receptor tyrosine-protein kinase erbB-2          | 0,850039907 | 0,164825195 |    |
| 189 | VKRGISGL      | Histone H4                                       | 1,530477838 | 0,269242613 |    |
| 190 | KRKQISVRG     | Glycogen phosphorylase                           | 2,84319548  | 0,59533685  | On |
| 191 | LPVPSTHIG     | cGMP-dependent protein kinase (PKG)              | 0,976000786 | 0,219328041 |    |
| 192 | QRRHSLEPP     | Tyrosine-protein kinase transforming protein SRC | 1,155575089 | 0,135520202 |    |
| 193 | SRTLVSSSL     | Glycogen [starch] synthase                       | 0,99302932  | 0,035581289 |    |
| 194 | KRPSEKA       | Myelin basic protein                             | 2,132826435 | 0,145741831 | On |
| 195 | LRGRSFMNN     | 6-phosphofructokinase                            | 1,53188838  | 0,127925662 | On |
| 196 | QRVSSYRRT     | Desmin                                           | 3,19615626  | 0,456413378 | On |
| 197 | HDLSEMFN      | Prolactin                                        | 0,683123399 | 0,140894898 |    |
| 198 | KRPSRAKA      | Myelin basic protein                             | 2,692267387 | 0,345648917 | On |
| 199 | EDNEYTARP     | Proto-oncogene tyrosine-protein kinase Src       | 1,557068626 | 0,403716642 |    |
| 200 | ENAPSSTSS     | DNA topoisomerase II                             | 0,57042569  | 0,045184549 |    |
| 201 | HMRSSMSGL     | acetyl-CoA carboxylase                           | 1,275486568 | 0,089289842 | On |
| 202 | LDRSSHAQR     | Insulin Receptor (IR)                            | 0,636673681 | 0,043139372 |    |
| 203 | PYKFPSSPLIPGZ |                                                  | 0,538851645 | 0,026748541 |    |
| 204 | GKEIYNTIR     | Ras p21 activator protein                        | 0,730847956 | 0,191624378 |    |
| 205 | APATPGGRR     | Myelin basic protein                             | 2,236244346 | 0,259189065 | On |
| 206 | DEEESSEAK     | elongation factor 1-beta                         | 0,781196493 | 0,094767738 |    |
| 207 | FFKKSIST      | glutamate receptor 6                             | 1,546271084 | 0,52760008  |    |
| 208 | GMGTSVERA     | pyruvate dehydrogenase E1                        | 0,71706642  | 0,108043229 |    |
| 209 | DYDSSDIED     | cactus                                           | 1,996035703 | 0,507186738 |    |
| 210 | EKRASGQAF     | stathmin                                         | 0,752476223 | 0,0423332   |    |
| 211 | RRAVSELDA     | tyrosine 3-monooxygenase                         | 0,566584319 | 0,058923211 |    |
| 212 | SDGGYMDMS     | platelet-derived growth factor receptor          | 0,742716184 | 0,074991059 |    |
| 213 | NWHMTPPRK     | serine/threonine protein phosphatase PP1         | 1,263544556 | 0,199274709 |    |
| 214 | RRASI         | pyruvate kinase                                  | 2,428309177 | 0,484361097 | On |
| 215 | AKKGSEQES     | cAMP-dependent protein kinase (PKA)              | 0,708252544 | 0,023555601 |    |
| 216 | DDMTGYVA      | Mitogen-activated protein kinase p38             | 0,877574608 | 0,084488617 |    |
| 217 | ETDYRKG       | Insulin Receptor (IR)                            | 0,7880736   | 0,126250979 |    |
| 218 | YVTTSTRTY     | vimentin                                         | 1,17548863  | 0,160104512 |    |
| 219 | SPQPSRRGS     | protein phosphatase 1                            | 2,390922232 | 0,431799255 | On |
| 220 | RRAASVA       | pyruvate kinase                                  | 1,639610377 | 0,162581147 | On |
| 221 | RPSENGQP      | Lens fiber major intrinsic protein               | 0,504372192 | 0,038981294 |    |
| 222 | SASTTPVKK     | Histone H1                                       | 1,149597913 | 0,069003263 |    |
| 223 | NSYGSRRG      | iron-responsive element binding protein          | 2,679994189 | 0,636323078 | On |

|     |                |                                                         |             |             |    |
|-----|----------------|---------------------------------------------------------|-------------|-------------|----|
| 224 | LRRASL         | pyruvate kinase                                         | 1,233949837 | 0,128241903 |    |
| 225 | SSTDSADSG      | Early E1A                                               | 0,580761434 | 0,055282385 |    |
| 226 | TKSGSTTKN      | eukaryotic translation initiation factor 4E             | 1,340028255 | 0,088702347 | On |
| 227 | VETTYADFI      | cAMP-dependent protein kinase inhibitor alpha           | 0,709933661 | 0,043309074 |    |
| 228 | YSFTTTAER      | Actin                                                   | 0,524583521 | 0,124924124 |    |
| 229 | SPFKYQSL       | Beta-2 adrenergic receptor                              | 0,635573671 | 0,095171877 |    |
| 230 | RKRSAAE        | Histone H2B                                             | 1,130995732 | 0,042729479 | On |
| 231 | VIKRSPRKR      | transcriptional factor SWI6                             | 3,176897733 | 0,247320189 | On |
| 232 | SPVKSPEAK      | neurofilament triplet M                                 | 0,673000137 | 0,06885946  |    |
| 233 | LRRASVAQL      | pyruvate kinase                                         | 1,928796347 | 0,096551681 | On |
| 234 | PRMPSLSVP      | Sodium channel protein                                  | 0,536196965 | 0,044793161 |    |
| 235 | SSPVYQDAV      | Cortactin                                               | 0,804560649 | 0,057382323 |    |
| 236 | TKDITYDALH     | T-cell surface glycoprotein CD3 zeta                    | 0,671789244 | 0,075821902 |    |
| 237 | LRSPSWEFP      | Heat Shock Protein 26                                   | 0,725518501 | 0,114237173 |    |
| 238 | PSLPTPPTR      | Microtubule-associated protein tau                      | 1,285501394 | 0,233843649 |    |
| 239 | KASASPRRK      | Histone H3                                              | 2,758843085 | 0,513807741 | On |
| 240 | KRRDYDLA       | Probable receptor with tyrosine-protein kinase activity | 0,794999209 | 0,092972151 |    |
| 241 | PAPAVRASDRA    | Troponin I                                              | 0,599477692 | 0,036616146 |    |
| 242 | QSRASDKQT      | T-cell surface glycoprotein CD3 gamma                   | 0,651322465 | 0,092935763 |    |
| 243 | KGQESFKKQ      | Nucleophosmin                                           | 1,781692692 | 0,164505368 | On |
| 244 | KRSGSVYEP      | phosphorylase b kinase beta                             | 2,177179888 | 0,195421224 | On |
| 245 | KRAQISVRGL     | Glycogen phosphorylase                                  | 2,547296418 | 0,308124088 | On |
| 246 | HSSQSQGGG      | Lamin C                                                 | 0,58496289  | 0,012437401 |    |
| 247 | MAEAYSEIG      | T-cell surface glycoprotein CD3 zeta                    | 1,097116088 | 0,266533594 |    |
| 248 | EEESSYSYE      | RNA polymerase alpha                                    | 2,331476056 | 0,728498033 |    |
| 249 | EQPGSDEED      | Ornithine decarboxylase                                 | 1,06125973  | 0,390670747 |    |
| 250 | IEQFSTVKG      | G protein-coupled receptor kinase 5                     | 0,616136235 | 0,080982783 |    |
| 251 | MLDHSESTK      | myelin                                                  | 0,695584642 | 0,047261541 |    |
| 252 | PYKFPSSPLRIPGZ |                                                         | 0,720826683 | 0,046154647 |    |
| 253 | GPRTTAQQ       | cGMP-dependent protein kinase (PKG)                     | 1,802832506 | 0,090980224 | On |
| 254 | AQDTYLVLD      | Erythropoietin Receptor                                 | 0,910350248 | 0,118515765 |    |
| 255 | DIPESQMEE      | Band 3 anion transport protein                          | 0,864427502 | 0,080868371 |    |
| 256 | FPRASFGSR      | Desmin                                                  | 2,345501613 | 0,361649826 | On |
| 257 | GRKASGSSP      | myosin light chain kinase                               | 1,418011805 | 0,084391374 | On |
| 258 | EDVGSDEEE      | HSP90-alpha                                             | 1,434616503 | 0,377751209 |    |
| 259 | EPAVSPLLP      | Tyrosine-protein kinase Dash/Abl                        | 1,0405223   | 0,231095145 |    |
| 260 | RRRASQLKI      | Gamma-aminobutyric-acid receptor beta-2                 | 1,073726783 | 0,139736202 |    |
| 261 | SFTTTAERE      | Actin                                                   | 0,714661422 | 0,036899319 |    |
| 262 | PLSRTL         | glycogen synthase                                       | 0,807662325 | 0,105490479 |    |
| 263 | SGRGK          | Histone H4                                              | 1,523626826 | 0,038187582 | On |
| 264 | APRSPGGRR      | Myelin basic protein                                    | 2,954066064 | 0,139017802 | On |
| 265 | DGERYDEDE      | Glycogen [starch] synthase                              | 1,619888087 | 0,343242467 |    |
| 266 | FKRPTLRRV      | troponin I                                              | 3,273670887 | 0,116813868 | On |
| 267 | REAEYEPET      | Cortactin                                               | 1,169419572 | 0,253342355 |    |
| 268 | DRVYIHPF       | Angiotensinogen                                         | 0,941892887 | 0,093986507 |    |
| 269 | VRRISGL        | Histone H4                                              | 1,763690321 | 0,266416031 | On |
| 270 | RRKGTDVNV      | Annexin I                                               | 1,463986014 | 0,120300821 | On |
| 271 | SETKTEEEE      | DNA topoisomerase II                                    | 0,937127451 | 0,16465544  |    |
| 272 | PQRATSNVF      | Myosin regulatory light chain 2                         | 1,065734959 | 0,137602832 |    |
| 273 | RRGSV          | pyruvate kinase or palladin                             | 2,390979473 | 0,295478709 | On |
| 274 | STSKSESSQ      | 40S ribosomal protein S6                                | 0,742469405 | 0,158672036 |    |
| 275 | TRAPSRTAS      | ATP-citrate (pro-S-) lyase                              | 1,795682767 | 0,331175199 | On |
| 276 | VPRTPGGRR      | Myelin basic protein                                    | 3,182735396 | 0,386690194 | On |
| 277 | RASSRSVR       | Lamin B0                                                | 4,135748472 | 1,019243292 | On |
| 278 | SPSSSPASL      | phosphorylcholine transferase                           | 0,739255708 | 0,12771421  |    |
| 279 | RVYVHPF        |                                                         | 1,813882815 | 0,351521814 | On |

|     |                |                                                     |             |             |    |
|-----|----------------|-----------------------------------------------------|-------------|-------------|----|
| 280 | VRRVSDDV       | Tyrosine 3-monooxygenase                            | 0,781012409 | 0,077255044 |    |
| 281 | SRKMSIQEY      | phosducin                                           | 0,854896195 | 0,129047462 |    |
| 282 | LSGFSEFKKS     | myristolated alanine-rich C-kinase substrate        | 1,773882688 | 0,159905448 | On |
| 283 | PSSTSSSSI      | DNA topoisomerase II                                | 0,764037357 | 0,137779652 |    |
| 284 | STGIYEALE      | Alpha enolase                                       | 1,372990327 | 0,402893507 |    |
| 285 | TPPKSPSAS      | Microtubule-associated protein tau                  | 0,841916457 | 0,017635184 |    |
| 286 | LYSSSPGGA      | vimentin                                            | 0,702943974 | 0,049775584 |    |
| 287 | PVPKSPVEE      | neurofilament triplet M                             | 0,674917566 | 0,119217195 |    |
| 288 | KKASFKAKK      |                                                     | 3,134601594 | 0,821999897 | On |
| 289 | KSPAKTVPK      | Actin and myosin binding protein                    | 2,043551318 | 0,203301944 | On |
| 290 | PLSKTLSVSS     | Glycogen [starch] synthase                          | 0,900289868 | 0,013450887 |    |
| 291 | SRGKSSSYS      | Fibrinogen alpha                                    | 1,681258596 | 0,224493236 | On |
| 292 | KKLGSKKPQ      | Sodium channel protein type II alpha                | 2,387077238 | 0,860060557 |    |
| 293 | KTASTRKV       | cystic fibrosis transmembrane conductance regulator | 3,149888417 | 0,493445714 | On |
| 294 | PRRTRRAS       | Protamine YII                                       | 0,878944964 | 0,209695983 |    |
| 295 | IHQRSRRL       | Neutrophil cytosol factor 2                         | 1,636216523 | 0,741962077 |    |
| 296 | NDALSGSGN      | galectin-3                                          | 0,618203616 | 0,062711676 |    |
| 297 | EETQTQDQP      | HSP90-alpha                                         | 0,627682822 | 0,062633144 |    |
| 298 | ERSQSRKDS      | alpha-1B adrenergic receptor                        | 0,959605767 | 0,247730459 |    |
| 299 | IRQASQAGP      | synapsins                                           | 0,644217302 | 0,096457613 |    |
| 300 | NFDDYMKEV      | Fatty acid-binding protein                          | 0,792411657 | 0,302821938 |    |
| 301 | PYKFPSSPLRIPGZ |                                                     | 0,576116388 | 0,131053438 |    |
| 302 | GRRQSLIQD      | tyrosine 3-monooxygenase                            | 0,917012628 | 0,015368302 |    |
| 303 | ASFEYTILD      | Erythropoietin Receptor                             | 0,922318199 | 0,110743474 |    |
| 304 | DLSTYASIN      | Insulin receptor substrate 2                        | 0,722065557 | 0,094556216 |    |
| 305 | GDNDYIPL       | platelet-derived growth factor receptor             | 0,821422018 | 0,17956383  |    |
| 306 | GSESTEDQA      | Alpha-S1 casein                                     | 0,781449123 | 0,258093594 |    |
| 307 | EENVSVDDT      | eukaryotic translation initiation factor 4E         | 0,757753209 | 0,151948039 |    |
| 308 | ERRKSKSGA      | cAMP-regulated phosphoprotein 21                    | 1,084088149 | 0,267764071 |    |
| 309 | RRRSRSRS       | Lamin B receptor                                    | 3,144556596 | 0,4751389   | On |
| 310 | SKIGSLDNI      | Microtubule-associated protein tau                  | 0,67758929  | 0,079528925 |    |
| 311 | NDITSL         | Tropomyosin beta                                    | 0,793148541 | 0,058656182 |    |
| 312 | AARGSFDAS      | rhodopsin kinase                                    | 0,699014914 | 0,083250597 |    |
| 313 | ARNDSVTVA      | cAMP response element-binding protein CRE-BP1       | 0,662578675 | 0,052141955 |    |
| 314 | DLFGSDEED      | elongation factor 1-beta                            | 0,95533683  | 0,224891626 |    |
| 315 | FSSRSYTSG      | Keratin 8                                           | 1,412629709 | 0,45616089  |    |
| 316 | RGKSSYSK       | Fibrinogen alpha                                    | 1,329297744 | 0,400116076 |    |
| 317 | RKRSRAEA       | Histone H2B                                         | 1,080886494 | 0,354911059 |    |
| 318 | LKRASLG        | pyruvate kinase                                     | 0,82634225  | 0,187047473 |    |
| 319 | RRRPTPATL      | Protein phosphatase inhibitor 1                     | 1,521292664 | 0,367435248 |    |
| 320 | SIADTFVGT      | Serine/threonine-protein kinase STE7                | 0,83285531  | 0,200410887 |    |
| 321 | LRRNSI         | cystic fibrosis transmembrane conductance regulator | 1,385936248 | 0,375816845 |    |
| 322 | RRRRASVA       | pyruvate kinase                                     | 3,457764876 | 0,674582985 | On |
| 323 | TATDYHTTS      | Band 3 anion transport protein                      | 0,781057843 | 0,072048311 |    |
| 324 | TRRASRPVR      | Protamine YII                                       | 1,869727    | 0,764396575 |    |
| 325 | VSSSYRRM       | vimentin                                            | 2,117261345 | 0,572788538 |    |
| 326 | REVSSLKKNK     | myosin heavy chain                                  | 1,219274111 | 0,344758807 |    |
| 327 | LSYRRYSL       |                                                     | 1,724034383 | 0,406149822 |    |
| 328 | KKKASVA        | pyruvate kinase                                     | 1,063357086 | 0,249198963 |    |
| 329 | WKRTSMKLL      | dihydropyridine-sensitive calcium channel           | 1,522918904 | 0,485670319 |    |
| 330 | SRRQSVLVK      | glutamate receptor 6                                | 1,684571897 | 0,328227693 |    |
| 331 | PENDYEDVE      | Hematopoietic cell-specific LYN substrate           | 1,887785337 | 0,305534235 | On |
| 332 | QEGLYNELQ      | T-cell surface glycoprotein CD3 zeta                | 0,872182973 | 0,258687754 |    |
| 333 | SVPPSPSLS      | Glycogen [starch] synthase                          | 0,679333204 | 0,078430107 |    |
| 334 | TRKVSLAPQ      | cystic fibrosis transmembrane conductance regulator | 0,970556209 | 0,210500023 |    |
| 335 | PKDPSQRRR      | Proto-oncogene tyrosine-protein kinase Src          | 1,387360304 | 0,381692438 |    |

|     |                |                                                           |             |             |    |
|-----|----------------|-----------------------------------------------------------|-------------|-------------|----|
| 336 | KRKQISVR       | Glycogen phosphorylase                                    | 2,750667546 | 0,922146597 |    |
| 337 | KLRRSSSVG      | Acetylcholine receptor protein delta                      | 2,949890408 | 0,813185533 | On |
| 338 | LDPLSEPED      | Thyroid hormone receptor alpha                            | 1,290307896 | 0,414626907 |    |
| 339 | QAGMTAPGT      | calponin alpha and beta                                   | 0,616133232 | 0,086468345 |    |
| 340 | SRRASRPVR      | Protamine Z                                               | 1,730603705 | 0,045739267 | On |
| 341 | KPGFSPQPS      |                                                           | 0,936942897 | 0,024513878 |    |
| 342 | LLPMSPEEF      | Signal Transducer and Activator of Transcription 1        | 0,950707751 | 0,405081018 |    |
| 343 | QLNDSSEEE      | E7 protein                                                | 1,112852022 | 0,536396444 |    |
| 344 | KGGSYSQAA      | HLA class I histocompatibility antigen B7                 | 1,266606151 | 0,142848517 |    |
| 345 | NIYISPLKS      | Retinoblastoma-associated protein                         | 1,285266585 | 0,087610046 | On |
| 346 | EIRVSINEK      | cGMP-dependent protein kinase (PKG)                       | 0,735432604 | 0,101395714 |    |
| 347 | ESRISLPLP      | vimentin                                                  | 0,717730471 | 0,074060726 |    |
| 348 | KRPSIRAKA      | Myelin basic protein                                      | 2,399166519 | 0,18479064  | On |
| 349 | NPGFYVEAN      | 1-phosphatidylinositol-4,5-bisphosphate phosphodiesterase | 1,10520729  | 0,090023377 |    |
| 350 | PYKFPSSPLRIPGZ |                                                           | 0,650046158 | 0,159764272 |    |
| 351 | GSRGSGSSV      | Desmin                                                    | 1,081074346 | 0,227457881 |    |
| 352 | DAGASPVEK      | myristolated alanine-rich C-kinase substrate (MARCKS)     | 0,74440043  | 0,08863166  |    |
| 353 | DRRVSVAE       | cAMP-dependent protein kinase II (PKA)                    | 0,646883091 | 0,074572359 |    |
| 354 | GGRASDYKS      | Myelin basic protein                                      | 1,159214293 | 0,192971549 |    |
| 355 | GVDTYVEMR      | Macrophage colony stimulating factor I receptor           | 0,772245126 | 0,077170215 |    |
| 356 | EGTHSTKRG      | Fibrinogen alpha                                          | 1,200488613 | 0,269555275 |    |
| 357 | ESLESYEIN      | Matrix Gla-protein                                        | 1,061046106 | 0,040065884 |    |
| 358 | RVRKTKGKY      | glutamate receptor 1                                      | 2,514384423 | 0,26963905  | On |
| 359 | SNPEYLSAS      | Insulin Receptor (IR)                                     | 0,991443451 | 0,229331139 |    |
| 360 | RRSTVA         | Protamines Z1 and Z2                                      | 1,716491096 | 0,197972521 | On |
| 361 | AEPGSPTAA      | myristolated alanine-rich C-kinase substrate (MARCKS)     | 0,597322906 | 0,134652928 |    |
| 362 | AVDGYVKPQ      | Signal Transducer and Activator of Transcription 5        | 0,679012595 | 0,101715632 |    |
| 363 | DPGVSYRTR      | pyruvate dehydrogenase E1                                 | 1,501298209 | 0,24049692  |    |
| 364 | GEINTEDDD      | calsequestrin                                             | 1,061776106 | 0,218316674 |    |
| 365 | RLSISTESQ      | phosphorylase b kinase alpha                              | 0,782054958 | 0,126929129 |    |
| 366 | RKEISVR        | Glycogen phosphorylase                                    | 1,802787753 | 0,147680669 | On |
| 367 | PGSPQKR        | Histone H2                                                | 0,799638286 | 0,059062786 |    |
| 368 | RSGYSSPGS      | Microtubule-associated protein tau                        | 1,038725867 | 0,261682239 |    |
| 369 | SLRASTSKS      | 40S ribosomal protein S6                                  | 1,762326998 | 0,246122555 | On |
| 370 | VRKISGL        | Histone H4                                                | 1,313966332 | 0,244688585 |    |
| 371 | ADGVYAASG      | Tyrosine-protein kinase transforming protein Fes          | 0,913780819 | 0,238790444 |    |
| 372 | TGFLTEYVA      | myelin                                                    | 1,037297698 | 0,2072529   |    |
| 373 | TVSTSLGHS      | muscarinic acetylcholine receptor M2                      | 0,800723164 | 0,190282023 |    |
| 374 | YDKEYYSVH      | Receptor tyrosine kinase for hepatocyte growth factor     | 1,486696877 | 0,175478467 | On |
| 375 | RKLKSQGTR      | spermatid nuclear transition protein 2                    | 1,771938354 | 0,14602622  | On |
| 376 | NRKPSKDKD      | Gamma-aminobutyric-acid receptor gamma                    | 1,858226469 | 0,394973639 |    |
| 377 | LRRASPG        | pyruvate kinase                                           | 1,360048283 | 0,266181059 |    |
| 378 | YMAPYDNYV      | platelet-derived growth factor receptor                   | 1,330728822 | 0,118024612 | On |
| 379 | SSKAYGNGY      | Beta-2 adrenergic receptor                                | 0,966733491 | 0,282095233 |    |
| 380 | PLTPSGEAP      | EGF Receptor                                              | 0,96220068  | 0,097758861 |    |
| 381 | RRRRPTPA       | pyruvate kinase                                           | 5,432932984 | 1,286180459 | On |
| 382 | TEGQYQPQP      | Proto-oncogene tyrosine-protein kinase Lck                | 0,937040956 | 0,039293466 |    |
| 383 | TSSSIFDI       | DNA topoisomerase II                                      | 1,039060771 | 0,133284598 |    |
| 384 | PPSPSLSRH      | Glycogen [starch] synthase                                | 2,80628903  | 0,154304198 | On |
| 385 | SSKRAKAK       | Myosin regulatory light chain 2                           | 2,699553013 | 0,657068341 | On |
| 386 | KRKNSILNP      | cystic fibrosis transmembrane conductance regulator       | 1,708036871 | 0,171768539 | On |
| 387 | LNRMSFASN      | acetyl-CoA carboxylase                                    | 1,247234671 | 0,085740815 | On |
| 388 | QRHGSKYLA      | Myelin basic protein                                      | 0,899533541 | 0,020430068 |    |
| 389 | SRTASFSES      | ATP-citrate (pro-S-) lyase                                | 0,869637646 | 0,169446018 |    |
| 390 | KRPSDRAKA      | Myelin basic protein                                      | 2,338548584 | 0,033724307 | On |
| 391 | LRGPSWDPF      | Heat Shock Protein 27                                     | 0,884670291 | 0,138958525 |    |

|     |                |                                                           |             |             |
|-----|----------------|-----------------------------------------------------------|-------------|-------------|
| 392 | QRSTSTPNV      | RAF proto-oncogene ser/thr-protein kinase                 | 0,677021073 | 0,050975086 |
| 393 | HDALSGSGN      | galectin-3                                                | 0,623857468 | 0,128619093 |
| 394 | KRPSQRAKY      | Myelin basic protein                                      | 1,846847724 | 0,869731912 |
| 395 | EDNEYTARE      | Tyrosine-protein kinase Hck                               | 1,040490459 | 0,437317654 |
| 396 | ENAFSPSRS      | caldesmon                                                 | 0,542069925 | 0,119957604 |
| 397 | HKSGYLSSE      | Connection of cytoskeletal structure to plasma membrane   | 0,59589773  | 0,10755099  |
| 398 | LAYESHESM      | Matrix Gla-protein                                        | 0,617623303 | 0,061334758 |
| 399 | PYKFPSSPLRIPGZ |                                                           | 0,781476666 | 0,161389085 |
| 400 | GHQGTVPSPD     | Beta-2 adrenergic receptor                                | 0,561663687 | 0,115673936 |
| 401 | ANDEYFIRK      | Acetylcholine receptor protein beta                       | 0,499518311 | 0,073203697 |
| 402 | DEASTTVSK      | Rhodopsin                                                 | 0,584622168 | 0,109013882 |
| 403 | FEARYQQPF      | 1-phosphatidylinositol-4,5-bisphosphate phosphodiesterase | 0,674661481 | 0,190540291 |
| 404 | GLLRSWNDP      | Prolactin                                                 | 0,780781805 | 0,040426163 |
| 405 | DTVTSQARA      | Proto-oncogene tyrosine-protein kinase Src                | 1,494242251 | 0,792889085 |
| 406 | EKHHSIDAQ      | Phosphoenolpyruvate carboxylase 1                         | 0,812819489 | 0,094658417 |
| 407 | RRASTIEMP      | Cardiac phospholamban                                     | 0,87187204  | 0,330934118 |
| 408 | SDEESNDDS      | calsequestrin                                             | 0,863816093 | 0,225057889 |
| 409 | NVFSSPGGT      | Actin and myosin binding protein                          | 0,599481353 | 0,049390423 |
| 410 | RRASF          | pyruvate kinase                                           | 1,641529474 | 0,863561659 |
| 411 | AKGGTVKAA      | annexin IV                                                | 1,026520867 | 0,362478339 |
| 412 | DDEITQDEN      | muscarinic acetylcholine receptor M2                      | 0,803447271 | 0,233496977 |
| 413 | ETDDYAEII      | Focal adhesion kinase                                     | 0,705942239 | 0,121022239 |
| 414 | YTTNSPSKI      | transcriptional factor SWI7                               | 0,565343886 | 0,090652702 |
| 415 | SPLKSPYKI      | Retinoblastoma-associated protein                         | 0,891842646 | 0,360743731 |
| 416 | RKRRTRKE       | Histone H2B                                               | 1,67091866  | 0,724032651 |
| 417 | RPPGFTPFR      |                                                           | 1,221292213 | 0,50675132  |
| 418 | SASGTPNKE      | caldesmon                                                 | 0,540826998 | 0,092008649 |
| 419 | NSVDTSSLS      | Glycogen [starch] synthase                                | 0,676869892 | 0,116171469 |
| 420 | LRANSI         | cystic fibrosis transmembrane conductance regulator       | 0,771618894 | 0,159229342 |
| 421 | SSSSPSRR       | Lamin B receptor                                          | 1,56861068  | 0,474902498 |
| 422 | TKSASFLKG      | nodulin-26                                                | 0,973189952 | 0,321449774 |
| 423 | VESLSSSEE      | Beta casein                                               | 0,82747219  | 0,207002317 |
| 424 | YRRNSVRFL      | Neutrophil cytosol factor 3                               | 1,886542755 | 0,921338038 |
| 425 | SPALTGDEA      | Insulin receptor substrate 4                              | 0,743862194 | 0,169836224 |
| 426 | RKQITVR        | Glycogen phosphorylase                                    | 2,107726586 | 0,958132329 |
| 427 | VHNRSKINL      | HMG-CoA reductase                                         | 1,199217685 | 0,358055552 |
| 428 | SPVHSIADE      | fructose-1,6-bisphosphatase                               | 0,609028099 | 0,092424964 |
| 429 | LRRASLGAF      | pyruvate kinase                                           | 1,781879926 | 0,600616105 |
| 430 | PRKGSPRKG      | Histone H2B.2                                             | 1,187109301 | 0,438077935 |
| 431 | SSPGSPGTP      | Microtubule-associated protein tau                        | 0,685087438 | 0,127697177 |
| 432 | TKAASEKKT      | myelin                                                    | 0,831129876 | 0,22458408  |
| 433 | LRRSSSVGY      | Acetylcholine receptor protein delta                      | 3,383154895 | 1,446529461 |
| 434 | PSEKSEEIT      | astrocytic phosphoprotein PEA-15                          | 0,734042891 | 0,119153269 |
| 435 | KAQEYFNIK      | Acetylcholine receptor protein delta                      | 0,747978744 | 0,102092802 |
| 436 | KRQSSTSNA      | phosphorylase b kinase beta                               | 1,289604453 | 0,313530174 |
| 437 | QKRPSQRSKYL    | Myelin basic protein                                      | 2,001211112 | 0,713574124 |
| 438 | QSPSSSPH       | phosphorylcholine transferase                             | 0,616407819 | 0,08252952  |
| 439 | KGHEYTNIK      | Protein-tyrosine phosphatase 2                            | 1,066943015 | 0,376117165 |
| 440 | KRRSSSYHV      | Sodium channel protein type II alpha                      | 3,848792139 | 1,515501575 |
| 441 | KAKQISVRGL     | Glycogen phosphorylase                                    | 1,807385959 | 0,650076198 |
| 442 | HSIYSSDDD      | Myb proto-oncogene protein                                | 0,863666502 | 0,328591698 |
| 443 | LVMQTAAGT      | myosin light chain kinase                                 | 1,096606468 | 0,285509894 |
| 444 | EEELYLEPL      | Tyrosine-protein kinase receptor                          | 1,177420643 | 0,361700218 |
| 445 | EQLSTSEEN      | Alpha-S2 casein                                           | 0,734427587 | 0,197460845 |
| 446 | IDMESQERI      | Transcription factor AP-1                                 | 0,707721194 | 0,112092049 |
| 447 | MILLSELSR      | eukaryotic translation initiation factor 4F               | 0,700024556 | 0,060632612 |



|     |                |                                                       |             |             |    |
|-----|----------------|-------------------------------------------------------|-------------|-------------|----|
| 448 | PYKFPSSPLRIPGZ |                                                       | 0,673944763 | 0,104224983 |    |
| 449 | GPAASPAAA      | myristolated alanine-rich C-kinase substrate (MARCKS) | 0,525971346 | 0,052250963 |    |
| 450 | AQAASPAKG      | Protein tyrosine phosphatase 1B                       | 0,835965603 | 0,067349799 |    |
| 451 | DHSRSTKAA      | myelin                                                | 1,50288373  | 0,084081937 | On |
| 452 | FPFHSPSRL      | Alpha crystallin B                                    | 1,982278093 | 0,289010103 | On |
| 453 | GRILTLPRS      | Insulin Receptor (IR)                                 | 2,308378263 | 0,840707797 |    |
| 454 | EDVGSDEED      | Heat Shock Protein 90-beta                            | 1,338720127 | 0,428084521 |    |
| 455 | ENTVSTSLG      | muscarinic acetylcholine receptor M2                  | 0,695056926 | 0,082976231 |    |
| 456 | RRQHSYDTF      | glutamate (NMDA) receptor epsilon                     | 1,137744221 | 0,109138519 |    |
| 457 | SFMMTPYVV      | Stress-activated protein kinase JNK1                  | 0,683108508 | 0,049857692 |    |
| 458 | PGTESFVNA      | Beta-2 adrenergic receptor                            | 0,793596904 | 0,174729594 |    |
| 459 | SDEEV          | Troponin T                                            | 1,001646525 | 0,212312643 |    |
| 460 | APQTPGGRR      | Myelin basic protein                                  | 2,317097311 | 0,651066317 |    |
| 461 | DFPLSPPKK      | stathmin                                              | 1,081711437 | 0,027965284 | On |
| 462 | FKAFSPKGS      | Actin and myosin binding protein                      | 1,652604625 | 0,130580599 | On |
| 463 | RDSNYISKG      | platelet-derived growth factor receptor               | 0,966961584 | 0,223351664 |    |
| 464 | DDEESESD       | synaptic vesicle amine transporter                    | 1,572438068 | 0,32769278  |    |
| 465 | VKRISGL        | Histone H4                                            | 1,482003637 | 0,18450474  | On |
| 466 | RRKDYPALH      |                                                       | 1,169850739 | 0,021250905 | On |
| 467 | SEKSKGLG       | myelin                                                | 0,997452038 | 0,012021435 |    |
| 468 | PPSAYGSVK      | Annexin II                                            | 1,419389347 | 0,158505977 | On |
| 469 | RRFSV          | pyruvate kinase                                       | 2,454408388 | 0,414642301 | On |
| 470 | STRRSVGRS      | multidrug resistance protein 1                        | 4,794770558 | 1,237521109 | On |
| 471 | TQSTSGRRR      | cAMP response element-binding protein CRE-BP2         | 4,04556688  | 0,491673672 | On |
| 472 | VNELSKDIG      | Alpha-S1 casein                                       | 0,863811151 | 0,026903725 |    |
| 473 | RAGETRFTD      | elongation factor 3                                   | 0,712089512 | 0,068674442 |    |
| 474 | SPSPSFRWP      | phosphorylcholine transferase                         | 1,135026513 | 0,262261709 |    |
| 475 | RVSGSRR        | Lamin C                                               | 4,778630332 | 1,291045941 | On |
| 476 | VRLRSSVPG      | vimentin                                              | 2,042634295 | 0,209355148 | On |
| 477 | SRKLSDFGQ      | Phenylalanine-4-hydroxylase                           | 0,891329547 | 0,084724041 |    |
| 478 | LSGFSFKKN      | myristolated alanine-rich C-kinase substrate          | 1,81184107  | 0,185240211 | On |
| 479 | PSRRSRRS       | Lamin B receptor                                      | 0,820567373 | 0,152918828 |    |
| 480 | STDYYREGP      | TrkC tyrosine kinase                                  | 1,757609312 | 0,240807084 | On |
| 481 | TPAISPSKR      | deoxyuridine 5'-triphosphate nucleotidohydrolase      | 2,012821788 | 0,341396845 | On |
| 482 | LVVASAGPT      | RNA polymerase alpha                                  | 0,818678499 | 0,044584406 |    |
| 483 | PVPEYINQS      | EGF Receptor                                          | 1,133641834 | 0,190441895 |    |
| 484 | KKAESPVKE      | neurofilament triplet M                               | 1,146302265 | 0,096967919 |    |
| 485 | KSLNYIDLD      | Insulin receptor substrate 5                          | 1,274401327 | 0,261988918 |    |
| 486 | KRKQISVRGL     | Glycogen phosphorylase                                | 2,381001728 | 0,342485255 | On |
| 487 | SRGDYMTMQ      | Insulin receptor substrate 6                          | 0,697231558 | 0,041896156 |    |
| 488 | KKKSGEDD       | eukaryotic translation initiation factor 4F           | 1,065043936 | 0,18568275  |    |
| 489 | KTSPSSSPA      | phosphorylcholine transferase                         | 0,944028724 | 0,175357433 |    |
| 490 | PRRRSSFGI      | Acetylcholine receptor protein gamma                  | 0,842322818 | 0,140958661 |    |
| 491 | IGSVSEDNS      | acetyl-CoA carboxylase                                | 1,921870449 | 0,996868085 |    |
| 492 | NAPVSALGE      | Myb proto-oncogene protein                            | 0,663278974 | 0,233945166 |    |
| 493 | EETPYSYPT      | Paxillin                                              | 1,651682129 | 0,632245859 |    |
| 494 | ERSPSPSFR      | phosphorylcholine transferase                         | 1,927244218 | 0,776020918 |    |
| 495 | IRKYTMRRL      | Receptor tyrosine-protein kinase erbB-2               | 2,487528854 | 1,034589987 |    |
| 496 | NEEESYSY       | RNA polymerase alpha                                  | 2,031345315 | 0,640434099 |    |
| 497 | PYKFPSSPLRIPGZ |                                                       | 0,86624345  | 0,199263704 |    |
| 498 | GRRQSLIED      | Tyrosine 3-monooxygenase                              | 0,987436768 | 0,316612032 |    |
| 499 | ASATSSSGG      | Glycogen [starch] synthase                            | 0,648155463 | 0,231942295 |    |
| 500 | DLPMSPRTL      | Signal Transducer and Activator of Transcription 3    | 0,645469869 | 0,162686863 |    |
| 501 | GDLQSAEFH      | Cystatin                                              | 0,84543498  | 0,247584283 |    |
| 502 | GSEEMYMMD      | Insulin receptor substrate 3                          | 0,725785546 | 0,147308352 |    |
| 503 | EENTYDEYE      | Cortactin                                             | 0,995926659 | 0,199757425 |    |



|     |                |                                                           |             |             |    |
|-----|----------------|-----------------------------------------------------------|-------------|-------------|----|
| 504 | ERRKSHEAE      | stathmin                                                  | 1,209240318 | 0,508915837 |    |
| 505 | RRRVTSATR      | glial fibrillary acidic protein                           | 2,522604221 | 1,208595076 |    |
| 506 | SKDSSKRGR      | myelin                                                    | 2,471244102 | 1,189072838 |    |
| 507 | MSVEEV         | eukaryotic translation initiation factor 4E               | 0,713975699 | 0,254341919 |    |
| 508 | AALESEDED      | eukaryotic translation initiation factor 4F               | 1,24973145  | 0,571519669 |    |
| 509 | ARKSTRRSI      | pleckstrin                                                | 2,428913805 | 1,16710307  |    |
| 510 | DLFGSDDEE      | elongation factor 1-beta                                  | 1,075790406 | 0,389890965 |    |
| 511 | FRRLSISTE      | phosphorylase b kinase alpha                              | 0,92274514  | 0,31403194  |    |
| 512 | RGAISAEVY      | cAMP-dependent protein kinase (PKA)                       | 1,04171451  | 0,320186193 |    |
| 513 | RKISASEF       |                                                           | 0,936433948 | 0,298703854 |    |
| 514 | LHRASLG        | pyruvate kinase                                           | 0,961872349 | 0,374089064 |    |
| 515 | RRRPTPAML      | Dopamine- and cAMP-regulated neuronal phosphoprotein      | 1,369247753 | 0,467738485 |    |
| 516 | SGYSSPGSP      |                                                           | 0,676774086 | 0,153130407 |    |
| 517 | LGEFTP         | Calgranulin B                                             | 0,721045318 | 0,199755287 |    |
| 518 | RRLSSLRA       | 40S ribosomal protein S6                                  | 3,822916852 | 1,490355265 |    |
| 519 | TAESSQAE       | Neuromodulin                                              | 0,802817415 | 0,203514296 |    |
| 520 | TRRASFSAQ      | Regulatory protein ADR1                                   | 1,65228839  | 0,706934981 |    |
| 521 | VSRTSAVPT      | Desmin                                                    | 0,745235764 | 0,158170438 |    |
| 522 | REQLSTSEE      | Alpha-S2 casein                                           | 0,71649335  | 0,30483284  |    |
| 523 | LSYRGYSL       |                                                           | 0,653495164 | 0,191411289 |    |
| 524 | KASGSSP        |                                                           | 0,735652082 | 0,246866005 |    |
| 525 | VVGGSRLGA      | Protein tyrosine phosphatase 1B                           | 1,385738389 | 0,540633583 |    |
| 526 | SRRPSYRKI      | cAMP response element binding protein                     | 1,730835823 | 0,721466863 |    |
| 527 | PEGDYEEVL      | Hematopoietic cell-specific LYN substrate                 | 1,36333146  | 0,260290671 |    |
| 528 | QEGDTDAGL      |                                                           | 1,005548902 | 0,398320143 |    |
| 529 | SVFSSPAS       | caldesmon                                                 | 0,64025575  | 0,234498583 |    |
| 530 | TRKISQTAQ      | ryanodine receptor                                        | 0,801592357 | 0,308189492 |    |
| 531 | PINGSPRTP      | Retinoblastoma-associated protein                         | 0,774966328 | 0,323425575 |    |
| 532 | KQISVRGL       | Glycogen phosphorylase                                    | 1,844722305 | 0,884140471 |    |
| 533 | KLINSIADT      | Serine/threonine-protein kinase STE7                      | 0,764870519 | 0,181455662 |    |
| 534 | LDDQYTSSS      | Tyrosine-protein kinase Tec                               | 1,400149136 | 0,624042437 |    |
| 535 | PYDNYVPSA      | platelet-derived growth factor receptor                   | 1,17905104  | 0,567083656 |    |
| 536 | SRQLSSGVS      | Heat Shock Protein 27                                     | 0,774918091 | 0,149586436 |    |
| 537 | KNIVTPRTP      | Myelin basic protein                                      | 1,593056567 | 0,599969113 |    |
| 538 | LKLASPELE      | Transcription factor AP-2                                 | 0,494216678 | 0,108309745 |    |
| 539 | QLIDSMANS      | mitogen-activated protein kinase kinase 1                 | 0,64793941  | 0,213998699 |    |
| 540 | IVYKSPVVS      |                                                           | 1,226161423 | 0,131281854 |    |
| 541 | NGYISAAEL      | Calmodulin                                                | 1,486211468 | 0,771989729 |    |
| 542 | EILNSPEKA      | 14-3-3 protein alpha/beta/delta/zeta                      | 0,634693841 | 0,098363337 |    |
| 543 | ESPESTEIT      | insulin-like growth factor binding protein 1              | 0,711255549 | 0,147466356 |    |
| 544 | KRPSHRAKA      | Myelin basic protein                                      | 1,798174898 | 0,127639532 | On |
| 545 | NNYVYIDPT      | Mast/stem cell growth factor receptor                     | 1,067106213 | 0,108221286 |    |
| 546 | PYKFPSSPLRIPGZ |                                                           | 0,609762184 | 0,146414932 |    |
| 547 | GSPRTPRRG      | Retinoblastoma-associated protein                         | 3,220200164 | 0,580850087 | On |
| 548 | DADEYLIPQ      | EGF Receptor                                              | 1,346841101 | 0,346399069 |    |
| 549 | DRLVSARSV      | Receptor tyrosine kinase for hepatocyte growth factor     | 1,453737652 | 0,108234146 | On |
| 550 | GGLTSPGLS      | Keratin 8                                                 | 0,682535411 | 0,102687957 |    |
| 551 | GTVPSDNID      | Beta-2 adrenergic receptor                                | 0,754224406 | 0,236009929 |    |
| 552 | EGSAYEEVP      | 1-phosphatidylinositol-4,5-bisphosphate phosphodiesterase | 1,361250766 | 0,187948178 |    |
| 553 | ESIISQETY      | Alpha-S2 casein                                           | 1,215332574 | 0,102426472 |    |
| 554 | RVRKSKGKY      | glutamate receptor 2                                      | 3,140985881 | 1,31859436  |    |
| 555 | SNDSTSVSA      | muscarinic acetylcholine receptor M2                      | 0,670267375 | 0,15290448  |    |
| 556 | RRPTVA         | Protein phosphatase inhibitor 2                           | 1,727191426 | 0,144509527 | On |
| 557 | AEPDYGALY      | 1-phosphatidylinositol-4,5-bisphosphate phosphodiesterase | 1,376155532 | 0,307822317 |    |
| 558 | AVASSPSKA      | myristolated alanine-rich C-kinase substrate (MARCKS)     | 0,933874896 | 0,119413466 |    |
| 559 | DPGTSYRTR      | pyruvate dehydrogenase E1                                 | 1,445949501 | 0,129536162 | On |

|     |                |                                                  |             |             |    |
|-----|----------------|--------------------------------------------------|-------------|-------------|----|
| 560 | GEGTYGVVY      | cell division control protein 2                  | 1,084677976 | 0,093593553 |    |
| 561 | RLRLSPSPT      | Lamin C                                          | 1,459915805 | 0,121285566 | On |
| 562 | RKASRKE        | Histone H2B                                      | 1,931399739 | 0,08349884  | On |
| 563 | LRRWSLG        | pyruvate kinase                                  | 1,291833494 | 0,129157126 |    |
| 564 | RRVTSATRR      | glial fibrillary acidic protein                  | 4,358324245 | 1,237525565 | On |
| 565 | SLQASIVTD      | guanine nucleotide-binding protein alpha         | 0,81147149  | 0,174749557 |    |
| 566 | RRATPA         | pyruvate kinase                                  | 1,536700811 | 0,122548088 | On |
| 567 | ADGIYAASG      | Tyrosine-protein kinase transforming protein Fes | 1,138605272 | 0,135568911 |    |
| 568 | TGDTYTAHA      | Tyrosine-protein kinase Dash/Abl                 | 0,706424519 | 0,139682024 |    |
| 569 | TVSKTETSQ      | Rhodopsin                                        | 0,801193229 | 0,136964371 |    |
| 570 | WTSDTQGDE      | 14-3-3 protein zeta                              | 1,360241665 | 0,295344091 |    |
| 571 | RKFSSARPE      | Sodium channel protein                           | 1,534875497 | 0,097529371 | On |
| 572 | KKKKASVA       | pyruvate kinase                                  | 1,550309691 | 0,636588889 |    |
| 573 | LRRASLG        | pyruvate kinase                                  | 2,108555484 | 0,266208444 | On |
| 574 | YKNDYYRKR      | Ros proto-oncogene tyrosine kinase               | 1,759659    | 0,283872801 | On |
| 575 | SSEITTKDL      | Prothymosin                                      | 0,943433414 | 0,159053394 |    |
| 576 | PLSRTLVS       | glycogen synthase                                | 1,177132081 | 0,167689219 |    |
| 577 | LRRASLRG       | pyruvate kinase                                  | 4,562738951 | 1,099002322 | On |
| 578 | TEGQYELQP      | Tyrosine-protein kinase Blk                      | 1,532057444 | 0,142934642 | On |
| 579 | TSPSSPAS       | phosphorylcholine transferase                    | 0,646696317 | 0,099656881 |    |
| 580 | PPSAYGSVK      | Annexin II                                       | 1,143115142 | 0,257269302 |    |
| 581 | RTKRSGSV       | phosphorylase b kinase beta                      | 3,363818778 | 0,648096813 | On |
| 582 | KRFGSKAHM      | nitric-oxide synthase                            | 2,787216321 | 0,426362491 | On |
| 583 | LNDSEEEED      | E7 protein                                       | 1,371449685 | 0,463822733 |    |
| 584 | QRATSNVFA      | Myosin regulatory light chain 3                  | 0,879948819 | 0,145964476 |    |
| 585 | SRSRTPSLP      |                                                  | 2,340979002 | 0,490269516 | On |
| 586 | KRPSARAKA      | Myelin basic protein                             | 3,056848409 | 0,425480919 | On |
| 587 | LRAPSWIDT      | Alpha crystallin B                               | 1,025318468 | 0,273144559 |    |
| 588 | QRRTSVSGE      | cAMP-dependent protein kinase                    | 0,844534858 | 0,10377751  |    |
| 589 | HATPSPPV       | Myb proto-oncogene protein                       | 0,551399877 | 0,050799413 |    |
| 590 | KRPSQRAKA      | Myelin basic protein                             | 1,49031329  | 0,635192129 |    |
| 591 | EDAESEDEE      | Nucleophosmin                                    | 1,458466041 | 0,704912063 |    |
| 592 | ENAEYLRVA      | EGF Receptor                                     | 0,875872112 | 0,186848764 |    |
| 593 | HKRKSSQAL      | Transforming protein erbA                        | 2,011914291 | 0,248892033 | On |
| 594 | LAYESHESL      | Matrix Gla-protein                               | 0,812729331 | 0,153358178 |    |
| 595 | PYKFPSSPLRIPGZ |                                                  | 0,616805528 | 0,065044683 |    |
| 596 | GGVDYKNIH      | Macrophage colony stimulating factor I receptor  | 0,601856323 | 0,092104507 |    |
| 597 | ALRPSTSR       | vimentin                                         | 1,194492638 | 0,434632527 |    |
| 598 | DEAATKTQT      | myosin II heavy chain                            | 0,704019513 | 0,11335221  |    |
| 599 | FARKSTRRS      | pleckstrin                                       | 2,122121297 | 0,940519169 |    |
| 600 | GLGESRKDK      | myelin                                           | 1,158390453 | 0,315871328 |    |
| 601 | DTHRTPSRS      | Proto-oncogene tyrosine-protein kinase Src       | 1,214402067 | 0,347739799 |    |
| 602 | EKESSNDST      | muscarinic acetylcholine receptor M2             | 0,780186788 | 0,107970806 |    |
| 603 | RRAISGLT       | dihydropyridine-sensitive calcium channel        | 0,699755329 | 0,181094014 |    |
| 604 | SAYRSVDEV      | 2-oxoisovalerate dehydrogenase alpha             | 0,701001431 | 0,12594972  |    |
| 605 | NTVSTSLGH      | muscarinic acetylcholine receptor M2             | 1,088508952 | 0,39191162  |    |
| 606 | RASLG          |                                                  | 1,101033206 | 0,404467904 |    |
| 607 | AKDASKRGR      | myelin                                           | 1,681357351 | 0,615972972 |    |
| 608 | DDEASTTVS      | Rhodopsin                                        | 0,80049364  | 0,145360179 |    |
| 609 | ETAESSQAE      | Neuromodulin                                     | 0,648460211 | 0,127317959 |    |
| 610 | YTRFSLARQ      | Transferrin receptor protein 1                   | 1,104482173 | 0,486853032 |    |
| 611 | SPKQSPSSS      | phosphorylcholine transferase                    | 0,637034931 | 0,081834973 |    |
| 612 | RKRSRKE        | Histone H2B                                      | 0,618963242 | 0,112794354 |    |
| 613 | RPPGFSPFR      |                                                  | 1,255866244 | 0,464047677 |    |
| 614 | SARVYENVG      | Protein-tyrosine phosphatase 3                   | 0,76054903  | 0,104196104 |    |
| 615 | NRSASEPSL      | RAF proto-oncogene ser/thr-protein kinase        | 0,653977885 | 0,029372096 |    |

|     |                |                                                           |             |             |    |
|-----|----------------|-----------------------------------------------------------|-------------|-------------|----|
| 616 | KGYSLG         | Lysozyme C                                                | 0,920322268 | 0,318152777 |    |
| 617 | SSSSSPKAE      | myristolated alanine-rich C-kinase substrate (MARCKS)     | 0,549760362 | 0,087252274 |    |
| 618 | TKKTSFVNF      | eukaryotic translation initiation factor 2 beta           | 1,311459985 | 0,564210784 |    |
| 619 | VEPLTPSGE      | EGF Receptor                                              | 0,793178546 | 0,052161678 |    |
| 620 | YRLPSNVQD      | Alpha crystallin A                                        | 0,59759195  | 0,037219523 |    |
| 621 | SPAISIHEI      | phosphorylase b kinase alpha                              | 0,667536564 | 0,101427157 |    |
| 622 | RKQISVR        | Glycogen phosphorylase                                    | 0,810098369 | 0,166536914 |    |
| 623 | VGWPTVRER      | Nef                                                       | 1,214470294 | 0,414288409 |    |
| 624 | QTYRSFHDL      | cGMP-dependent protein kinase (PKG)                       | 1,28541732  | 0,462271822 |    |
| 625 | LRRASLGAA      | pyruvate kinase                                           | 1,602217697 | 0,552696482 |    |
| 626 | PRKGSPPRG      | Histone H2B.2                                             | 0,763763285 | 0,08551006  |    |
| 627 | SSPASLSRA      | phosphorylcholine transferase                             | 0,974722251 | 0,250948827 |    |
| 628 | TKAASEKKS      | myelin                                                    | 0,715258637 | 0,103317035 |    |
| 629 | LRRPSDQEV      | c-Rel proto-oncogene protein                              | 0,765613592 | 0,051913732 |    |
| 630 | PSAPSPQPK      | Tyrosine 3-monooxygenase                                  | 0,712072565 | 0,054912796 |    |
| 631 | KAKVTGRWK      | troponin T                                                | 2,411964084 | 1,054717257 |    |
| 632 | KRPTQRAKY      | Myelin basic protein                                      | 2,824247696 | 1,226055183 |    |
| 633 | PLSRTL SVRSL   | Glycogen [starch] synthase                                | 1,225402068 | 0,363259001 |    |
| 634 | QSPGSPLEE      | Neutrophil cytosol factor 5                               | 0,799535204 | 0,16947074  |    |
| 635 | KGGSYSQAA      | HLA class I histocompatibility antigen B7                 | 0,988350421 | 0,167130531 |    |
| 636 | KRRRSSKDT      | glutamate (NMDA) receptor subunit zeta 4                  | 1,899210601 | 0,491347871 |    |
| 637 | KAQISVRGL      | Glycogen phosphorylase                                    | 1,24300283  | 0,031967677 | On |
| 638 | HRTPSRSFG      | Proto-oncogene tyrosine-protein kinase Src                | 1,687074305 | 0,660176157 |    |
| 639 | LSGF SFKKN     | myristolated alanine-rich C-kinase substrate              | 1,268015962 | 0,427705819 |    |
| 640 | EEEEYMPME      | Middle T antigen                                          | 0,845372308 | 0,193513522 |    |
| 641 | EQFSTVKGV      | G protein-coupled receptor kinase 6                       | 0,645411631 | 0,050094302 |    |
| 642 | IDKISRIGF      | glycine receptor alpha                                    | 0,918426264 | 0,276539733 |    |
| 643 | MHRQETVDA      | calcium/calmodulin-dependent protein kinase type II alpha | 0,5777407   | 0,067407087 |    |
| 644 | PYKFPSSPLRIPGZ |                                                           | 0,620112881 | 0,05973135  |    |
| 645 | GNHTYQEIA      | Paxillin                                                  | 0,692878826 | 0,139250521 |    |
| 646 | APVASPAAP      | synapsins IA and IB                                       | 0,634218327 | 0,052828541 |    |
| 647 | DGNN SDEES     | calsequestrin                                             | 0,8801576   | 0,289361848 |    |
| 648 | FMTEYVVTR      | mitogen-activated protein kinase MSK7                     | 1,002809583 | 0,271187496 |    |
| 649 | GRGLSLSRF      | Myelin basic protein                                      | 1,642821497 | 0,507337394 |    |
| 650 | EDTLSDSDD      | N-myc proto-oncogene protein                              | 1,51711047  | 0,756553012 |    |
| 651 | ENQASEEED      | Dopamine- and cAMP-regulated neuronal phosphoprotein      | 1,053694431 | 0,518434293 |    |
| 652 | RRPTSPVSR      | Early E1A                                                 | 1,584184458 | 0,529244147 |    |
| 653 | SFMDSSGLG      | anti-sigma F factor antagonist                            | 0,871951561 | 0,108912313 |    |
| 654 | QKRPSQRSK      | Myelin basic protein                                      | 1,850344872 | 0,577554628 |    |
| 655 | SDEEH          | initiation factor 5A                                      | 0,72090851  | 0,024330002 |    |
| 656 | APLTPGGRR      | Myelin basic protein                                      | 1,650587252 | 0,586349855 |    |
| 657 | DEPSTPYHS      | Protein phosphatase inhibitor 2                           | 0,795379411 | 0,072913248 |    |
| 658 | FGSRSLYGL      | keratin, type II                                          | 1,088789301 | 0,282390292 |    |
| 659 | RDPVTENAV      | muscarinic acetylcholine receptor M2                      | 0,736273592 | 0,067126115 |    |
| 660 | AVRRSDRA       | Troponin I                                                | 1,311380583 | 0,3874513   |    |
| 661 | VKRG SGL       | Histone H4                                                | 1,222011372 | 0,398296036 |    |
| 662 | RRKDTPALH      |                                                           | 1,115698934 | 0,262447592 |    |
| 663 | SEITTKDLK      | Prothymosin                                               | 0,717330006 | 0,082582302 |    |
| 664 | PNVSYIASR      | protein kinase shaggy                                     | 1,218743828 | 0,36613806  |    |
| 665 | RRDSV          | pyruvate kinase                                           | 1,232298188 | 0,291725612 |    |
| 666 | STRRSIRLP      | pleckstrin                                                | 3,004433392 | 1,317824252 |    |
| 667 | TPQVSDTMR      | glycogenin                                                | 0,840784428 | 0,081273493 |    |
| 668 | VNATYVNVK      | Receptor tyrosine kinase for hepatocyte growth factor     | 0,716476093 | 0,105734876 |    |
| 669 | RAAHSIKGG      | Chemotaxis protein cheA                                   | 1,358066512 | 0,506981699 |    |
| 670 | SPSLSRHSS      | Glycogen [starch] synthase                                | 1,723851549 | 0,503290236 |    |
| 671 | RTPPPSG        | Myelin basic protein                                      | 1,023381096 | 0,194734259 |    |

|     |                |                                                         |             |             |    |
|-----|----------------|---------------------------------------------------------|-------------|-------------|----|
| 672 | VRKRTLRL       | EGF Receptor                                            | 2,412643351 | 1,120098203 |    |
| 673 | SRKSGFGH       | gap junction beta-1 protein                             | 1,512984045 | 0,556755583 |    |
| 674 | LSGESDLEI      | DNA topoisomerase II                                    | 1,104065347 | 0,3350593   |    |
| 675 | PSQRSKYLA      | Myelin basic protein                                    | 0,833261425 | 0,159884332 |    |
| 676 | STDEYLDLS      | Receptor tyrosine kinase                                | 1,273892968 | 0,408001824 |    |
| 677 | TNHIYSNLA      | Mast/stem cell growth factor receptor                   | 0,94140255  | 0,080502095 |    |
| 678 | LSRHSSPHQ      | Glycogen [starch] synthase                              | 1,460902912 | 0,431647364 |    |
| 679 | PTRHSRVAE      | Lamin                                                   | 1,016956947 | 0,111717525 |    |
| 680 | KISITSRKA      | GTP-binding protein era                                 | 1,874547431 | 0,428174354 |    |
| 681 | KSKISASRK      | troponin I                                              | 2,25280943  | 1,007289034 |    |
| 682 | KRKQISVGG      | Glycogen phosphorylase                                  | 1,421707698 | 0,506049369 |    |
| 683 | SRALSRQLS      | Heat Shock Protein 27                                   | 1,959168707 | 0,736986551 |    |
| 684 | KKKFSFKKP      | MARCKS-related protein                                  | 3,160108761 | 1,775295751 |    |
| 685 | KTRSSRAGL      | Histone H2A                                             | 2,281575693 | 0,982194266 |    |
| 686 | PAPGSPEPP      | Early E1A                                               | 0,959249751 | 0,146543178 |    |
| 687 | IGSESTEDQ      | Alpha-S1 casein                                         | 0,997355943 | 0,354154505 |    |
| 688 | MRRNSFTPL      | fructose-2,6-bisphosphatase                             | 1,120318376 | 0,098867136 |    |
| 689 | EEQEYVQTV      | Annexin I                                               | 0,945630146 | 0,322450699 |    |
| 690 | ERRVSNAGG      | vasodilator-stimulated phosphoprotein                   | 0,897006324 | 0,083235501 |    |
| 691 | IREESPPTS      | Glycoprotein IV                                         | 0,67750496  | 0,138307337 |    |
| 692 | NDSVYANWM      | Probable receptor with tyrosine-protein kinase activity | 1,317365622 | 0,13696993  |    |
| 693 | PYKFPSSPLRIPGZ |                                                         | 0,649579085 | 0,101139239 |    |
| 694 | GRRESLTSF      | inositol 1,4,5-trisphosphate-binding protein            | 1,7465027   | 0,089790961 | On |
| 695 | ARVFSVLRE      | Ser/Thr poetin phosphatase 2B                           | 1,515263476 | 0,179349062 | On |
| 696 | DLPLSPSAF      | tristetrapoline                                         | 1,149105933 | 0,220399601 |    |
| 697 | GDKKSKKAK      | Na+/K+ ATPase 1                                         | 1,662812586 | 0,473636597 |    |
| 698 | GSDVSFNEE      | DNA topoisomerase II                                    | 1,323671717 | 0,41097196  |    |
| 699 | EEKGSPLNA      | Protein tyrosine phosphatase 1B                         | 0,677686149 | 0,153268495 |    |
| 700 | ERQKTQTKL      | myosin light chain kinase                               | 1,532244352 | 0,02974979  | On |
| 701 | RRRSSKDTS      | glutamate (NMDA) receptor subunit zeta 3                | 1,365898387 | 0,054924262 | On |
| 702 | SKAGSLGNI      |                                                         | 0,860741606 | 0,037237002 |    |
| 703 | MSGDEM         | eukaryotic translation initiation factor 2 beta         | 0,701271457 | 0,105192551 |    |
| 704 | AAATTPAAE      | neuromodulin                                            | 0,630056022 | 0,100975386 |    |
| 705 | ARKKSSAQL      | ras-related protein rap-1b                              | 1,169495732 | 0,368343338 |    |
| 706 | DKVTSPTKV      | caldesmon                                               | 0,820046398 | 0,137905906 |    |
| 707 | FRRFTPDSL      | Sodium channel protein                                  | 1,076660408 | 0,231111983 |    |
| 708 | RFTDTRKDE      | elongation factor 4                                     | 0,767741628 | 0,115663653 |    |
| 709 | RKISASEA       |                                                         | 0,83629017  | 0,058907061 |    |
| 710 | LARASLG        | pyruvate kinase                                         | 1,198431943 | 0,090831924 |    |
| 711 | RRRLSSLRA      | 40S ribosomal protein S6                                | 1,256996961 | 0,221811012 |    |
| 712 | SGYISSLEY      | Complement C1r                                          | 1,574264617 | 0,340984886 |    |
| 713 | LARNSI         | cystic fibrosis transmembrane conductance regulator     | 0,724192577 | 0,176144196 |    |
| 714 | TIAVG          | Photosystem Q(A)                                        | 0,688191851 | 0,149098729 |    |
| 715 | TADISEDEE      | phosphorylcholine transferase                           | 1,519121915 | 0,395465706 |    |
| 716 | TRQTSVSGQ      | synapsins IA and IB                                     | 0,915847405 | 0,125874687 |    |
| 717 | VSEEYDLDR      | Fibroblast growth factor receptor 4                     | 1,24451697  | 0,220963834 |    |
| 718 | REQESSGEE      | Protein phosphatase inhibitor 2                         | 0,86316518  | 0,146256838 |    |
| 719 | GTKRSGSV       | phosphorylase b kinase beta                             | 1,842688804 | 0,034579317 | On |
| 720 | NRLQTMKEE      | Lamin C                                                 | 0,858764948 | 0,103662306 |    |
| 721 | VVELSGESD      | DNA topoisomerase II                                    | 1,376920993 | 0,563840073 |    |
| 722 | SRRPSRATW      | Vitronectin                                             | 3,11969923  | 0,718627374 | On |
| 723 | PASQTPNKT      | Proto-oncogene tyrosine-protein kinase Src              | 0,752728753 | 0,132150631 |    |
| 724 | QDPVSPSLV      | muscarinic acetylcholine receptor M2                    | 0,977413208 | 0,171993617 |    |
| 725 | STTVSKTET      | Rhodopsin                                               | 0,831712562 | 0,117125055 |    |
| 726 | TRKISASEF      |                                                         | 0,770949135 | 0,096789618 |    |
| 727 | PGPQSPGSP      | Neutrophil cytosol factor 4                             | 0,713640812 | 0,095491622 |    |

|     |                |                                                         |             |             |    |
|-----|----------------|---------------------------------------------------------|-------------|-------------|----|
| 728 | KQGSGRGL       | Glycogen phosphorylase                                  | 2,12367197  | 0,457554916 | On |
| 729 | KKSWRWTL       | parathyroid hormone/parathyroid hormone-related peptide | 3,059099115 | 0,424804622 | On |
| 730 | LASSSKEEN      | Cystatin S                                              | 0,979397149 | 0,133863087 |    |
| 731 | PLRRTLVA       | glycogen synthase                                       | 1,09956066  | 0,257824841 |    |
| 732 | SRPSSNRSY      | vimentin                                                | 2,769895406 | 0,387284829 | On |
| 733 | KNDYYRKRK      | Ros proto-oncogene tyrosine kinase                      | 2,188965473 | 0,299720973 | On |
| 734 | LIEDAEYTA      | Proto-oncogene tyrosine-protein kinase Lck, Fyn, Yes    | 1,328840095 | 0,350800951 |    |
| 735 | QKAQTERKS      | troponin T                                              | 1,479608348 | 0,089976331 | On |
| 736 | ISTESQPNG      | phosphorylase b kinase alpha                            | 0,608814829 | 0,095580012 |    |
| 737 | NGNNYVYID      | Mast/stem cell growth factor receptor                   | 0,96041003  | 0,168882373 |    |
| 738 | EIKKSWSRW      | parathyroid hormone/parathyroid hormone-related peptide | 1,349978482 | 0,34149836  |    |
| 739 | ESPASDEAE      | Nonhistone chromosomal protein HMG-14                   | 0,980596025 | 0,438238577 |    |
| 740 | KRKSSQALV      | Transforming protein erbA                               | 1,604267259 | 0,530346988 |    |
| 741 | NNMPSSDDG      | muscarinic acetylcholine receptor M2                    | 0,562839548 | 0,095412729 |    |
| 742 | PYKFPSSPLRIPGZ |                                                         | 0,612680596 | 0,052277169 |    |
| 743 | GSPGTPGSR      |                                                         | 1,109323735 | 0,156587045 |    |
| 744 | AVVRTPPKS      |                                                         | 1,500581184 | 0,194258131 | On |
| 745 | DRKLSTKEA      | multidrug resistance protein 2                          | 0,909318017 | 0,230164731 |    |
| 746 | GGIRSLNVA      | isocitrate dehydrogenase                                | 0,850113298 | 0,030351766 |    |
| 747 | GTRLRLARM      | glial fibrillary acidic protein                         | 1,785291109 | 0,135911373 | On |
| 748 | EGNKSPAPK      | Actin and myosin binding protein                        | 0,753194408 | 0,271783767 |    |
| 749 | ESHESMESY      | Matrix Gla-protein                                      | 0,907853195 | 0,321515129 |    |
| 750 | RVRISADAM      | Troponin I                                              | 0,68286684  | 0,116443653 |    |
| 751 | SNDDSDDDD      | calsequestrin                                           | 1,307181904 | 0,445356893 |    |
| 752 | RRPTPA         | Protein phosphatase inhibitor 3                         | 1,579285689 | 0,117846277 | On |
| 753 | AEGSSNVFS      | Myosin regulatory light chain 2                         | 0,771843724 | 0,229128009 |    |
| 754 | AVADSESED      | cAMP-dependent protein kinase II (PKA)                  | 1,433424604 | 0,166003126 | On |
| 755 | DNPDYQQDF      | EGF Receptor                                            | 1,439302766 | 0,132693965 | On |
| 756 | GDVKYADIE      | platelet-derived growth factor receptor                 | 0,913150323 | 0,116362685 |    |
| 757 | RLQDYEEKT      | Connection of cytoskeletal structure to plasma membrane | 0,870056128 | 0,296704895 |    |
| 758 | FKKSFKL        | myristolated alanine-rich C-kinase substrate            | 1,571695074 | 0,783132095 |    |
| 759 | LRRPSLG        | pyruvate kinase                                         | 1,850603055 | 0,419450846 |    |
| 760 | RRVRSQEPG      | somatostatin receptor type 4                            | 1,188735186 | 0,368415478 |    |
| 761 | SLDDSGSAM      | alpha-1B adrenergic receptor                            | 0,806470984 | 0,239087993 |    |
| 762 | RRASVA         | pyruvate kinase                                         | 2,144190608 | 0,209654449 | On |
| 763 | ADDEYAPKQ      | Tyrosine-protein kinase Src64B                          | 1,077244365 | 0,167371568 |    |
| 764 | TESQYQQQP      | Tyrosine-protein kinase Hck                             | 0,648136326 | 0,078589313 |    |
| 765 | TVKSSKGGP      | Annexin I                                               | 1,160215286 | 0,325398438 |    |
| 766 | WTSDSAGEE      | 14-3-3 protein tau                                      | 1,344880824 | 0,628339658 |    |
| 767 | RKAASVIK       | DNA polymerase beta                                     | 1,520646874 | 0,456936509 |    |
| 768 | LRRASLDG       | pyruvate kinase                                         | 0,791733389 | 0,253911394 |    |
| 769 | LRRASGG        | pyruvate kinase                                         | 1,320231546 | 0,365572594 |    |
| 770 | YHTTSHPGT      | Band 3 anion transport protein                          | 1,104585061 | 0,302409708 |    |
| 771 | SSEESITRI      | Beta casein                                             | 1,049954967 | 0,371297852 |    |
| 772 | PLAGSPVIA      | casein kinase II                                        | 1,178683227 | 0,283877869 |    |
| 773 | LGSPLRRR       | vimentin                                                | 4,830325261 | 1,181228162 | On |
| 774 | TEDQYSLVE      | PI3-kinase p85-alpha                                    | 1,710860925 | 0,347365902 |    |
| 775 | TRTYSLGSA      | vimentin                                                | 1,267418535 | 0,513786358 |    |
| 776 | PPSAYATVK      | Annexin II                                              | 1,195663578 | 0,31576416  |    |
| 777 | RTKRSGSV       | phosphorylase b kinase beta                             | 3,330297964 | 0,437236695 | On |
| 778 | KREASLDNQ      | Phytochrome A                                           | 0,784349395 | 0,106411244 |    |
| 779 | LMDKYHVDN      | Early E2A                                               | 0,754514214 | 0,139681212 |    |
| 780 | QQGMTVYGL      | calponin alpha and beta                                 | 1,151120704 | 0,299821036 |    |
| 781 | SRSRSRSRS      | Lamin B receptor                                        | 5,10558971  | 0,652998689 | On |
| 782 | KRNSSPPPS      |                                                         | 1,775062473 | 0,284151764 | On |
| 783 | LQRYSSDPT      | EGF Receptor                                            | 0,691001585 | 0,165294812 |    |



|     |                |                                                          |             |             |    |
|-----|----------------|----------------------------------------------------------|-------------|-------------|----|
| 784 | QRRTSLTGS      | Volt.-dep. L-type calcium channel alpha-1S               | 1,732229944 | 0,279753669 | On |
| 785 | GVRQSRASD      | T-cell surface glycoprotein CD3 gamma                    | 0,967034172 | 0,15448684  |    |
| 786 | KRPSNRAKA      | Myelin basic protein                                     | 1,885402139 | 0,136506843 | On |
| 787 | EAVTSPRFI      | Tyrosine 3-monooxygenase                                 | 0,864400708 | 0,052476948 |    |
| 788 | EMTGYVATR      | Mitogen-activated protein kinase p38                     | 0,767708485 | 0,079503225 |    |
| 789 | HKIKSGAEA      | DNA polymerase beta                                      | 1,028975872 | 0,140032025 |    |
| 790 | LARRSTTDA      | Choriogonadotropin beta                                  | 0,892422752 | 0,027277478 |    |
| 791 | PYKFPSSPLRIPGZ |                                                          | 0,762799594 | 0,055139431 |    |
| 792 | GGTGTPNKE      | Actin and myosin binding protein                         | 0,679388828 | 0,163449382 |    |
| 793 | ALGISYGRK      | TAT protein                                              | 1,780947085 | 0,253697899 | On |
| 794 | DDSGSAMSG      | alpha-1B adrenergic receptor                             | 0,7739128   | 0,128086082 |    |
| 795 | EYVQTVKSS      | Annexin I                                                | 0,787414738 | 0,054124266 |    |
| 796 | GKTDYMGEA      | Beta-2 adrenergic receptor                               | 0,889109195 | 0,055819532 |    |
| 797 | DSTYYKASK      | Focal adhesion kinase                                    | 1,396381735 | 0,075138183 | On |
| 798 | EKEISDDEA      | Heat Shock Protein 90-beta                               | 0,97973449  | 0,226354354 |    |
| 799 | RRADSLQKN      | iron-responsive element binding protein                  | 1,114478473 | 0,204812262 |    |
| 800 | SAYGSVKAY      | Annexin II                                               | 0,882713898 | 0,131046042 |    |
| 801 | NTSSSPQPK      | p53                                                      | 1,118914046 | 0,216024952 |    |
| 802 | GSRRR          | protamine                                                | 3,603196768 | 0,063201941 | On |
| 803 | AKAKTTKKR      | Myosin regulatory light chain 2                          | 3,457704662 | 0,443358416 | On |
| 804 | DDAYSDET       | Protein phosphatase inhibitor 2                          | 2,277538247 | 0,245352674 | On |
| 805 | ESVDYVPM       | platelet-derived growth factor receptor                  | 1,335878524 | 0,220650105 |    |
| 806 | YSTDYREG       | TrkC tyrosine kinase                                     | 1,415846006 | 0,149262698 | On |
| 807 | SPKKSPRKA      | Histone H4                                               | 2,055832814 | 0,344820746 | On |
| 808 | RKRSRKA        | Histone H2B                                              | 2,537403889 | 0,421905014 | On |
| 809 | RPPASPSQ       | synapsins IA and IB                                      | 1,094988677 | 0,24307915  |    |
| 810 | SARLSAKPA      | Nonhistone chromosomal protein HMG-14                    | 1,478925103 | 0,204137115 |    |
| 811 | NRQSSQARV      | Phytochrome A                                            | 1,713054674 | 0,216767644 | On |
| 812 | KEAKSD         | Nonhistone chromosomal protein HMG-14                    | 0,895471075 | 0,191472775 |    |
| 813 | SSSNTIRRP      | fructose-2,6-bisphosphatase                              | 2,844984206 | 1,179358466 |    |
| 814 | TKKQSFQKT      | cystic fibrosis transmembrane conductance regulator      | 1,468900054 | 0,121783145 | On |
| 815 | VDSAYEVIK      | L-lactate dehydrogenase M                                | 1,414353149 | 0,358481785 |    |
| 816 | YRKSSLKSR      | spermatid nuclear transition protein 3                   | 2,720768125 | 0,518994647 | On |
| 817 | SNVSSTGSI      |                                                          | 1,219666818 | 0,363835969 |    |
| 818 | RARSRKE        | Histone H2B                                              | 2,140225733 | 0,04449098  | On |
| 819 | VGPGYLGSG      | Probable receptor with tyrosine-protein kinase activity  | 0,945419182 | 0,10384939  |    |
| 820 | QTVKSSKGG      | Annexin I                                                | 1,436571651 | 0,152468935 | On |
| 821 | LRMFSFKAP      | Gamma-aminobutyric-acid receptor gamma-2                 | 1,425644619 | 0,111020123 | On |
| 822 | PRHLSNVSS      |                                                          | 1,107595621 | 0,260016108 |    |
| 823 | SSNEYMDMK      | Mast/stem cell growth factor receptor                    | 1,248999966 | 0,526586747 |    |
| 824 | THYGSLPQK      | Myelin basic protein                                     | 1,359521818 | 0,214519096 |    |
| 825 | LRRPSDQAV      | Transforming protein rel                                 | 1,225078004 | 0,176275396 |    |
| 826 | PRRNSRASL      | Sodium channel protein type II alpha                     | 1,01347471  | 0,049650893 |    |
| 827 | KAKTTKKRP      | Myosin regulatory light chain 2                          | 3,270105634 | 0,345281148 | On |
| 828 | KRPSGRAKA      | Myelin basic protein                                     | 2,89294367  | 0,228027927 | On |
| 829 | PLSKTSLVSSL    | Glycogen [starch] synthase                               | 1,146010006 | 0,162849694 |    |
| 830 | QSGMTEYVA      | Mitogen-activated protein kinase FUS3                    | 1,215939413 | 0,187264674 |    |
| 831 | KGATSDEED      | DNA topoisomerase II                                     | 1,183547168 | 0,160905971 |    |
| 832 | KRRNSEFEI      | tryptophan 5-monooxygenase                               | 1,626789208 | 0,003788042 | On |
| 833 | LTRRASFSAQ     | Regulatory protein ADR1                                  | 2,215397506 | 0,083992784 | On |
| 834 | HRQETVEAL      | calcium/calmodulin-dependent protein kinase type II beta | 0,7807126   | 0,046616882 |    |
| 835 | LRRFSLATM      | Cytochrome P450 2B1                                      | 1,627766417 | 0,45625805  |    |
| 836 | EEEAYGWMD      | Gastrin                                                  | 1,345480926 | 0,461709025 |    |
| 837 | EQESSGEED      | Protein phosphatase inhibitor 2                          | 1,005614904 | 0,225729336 |    |
| 838 | IAADSEAEQ      | Insulin receptor substrate 7                             | 0,917594677 | 0,04770223  |    |
| 839 | MGEASGAQL      | Beta-2 adrenergic receptor                               | 0,812103729 | 0,081538024 |    |



|     |                |                                                                |             |             |    |
|-----|----------------|----------------------------------------------------------------|-------------|-------------|----|
| 840 | PYKFPSSPLRIPGZ |                                                                | 0,863713235 | 0,094529989 |    |
| 841 | GNGDYMPMS      | Insulin receptor substrate 8                                   | 0,902045253 | 0,086113588 |    |
| 842 | APRYPGGRR      | Myelin basic protein                                           | 3,281388925 | 0,884171762 | On |
| 843 | DGNKSPAPK      | caldesmon                                                      | 0,942566233 | 0,140133152 |    |
| 844 | FMTEYVATR      | mitogen-activated protein kinase                               | 1,008656503 | 0,158563856 |    |
| 845 | GRASSHSSQ      | Lamin C                                                        | 1,895815566 | 0,607398181 |    |
| 846 | EDSTYYKAS      | Focal adhesion kinase                                          | 1,852295788 | 0,308596406 | On |
| 847 | ENPQYFRQG      | TrkC tyrosine kinase                                           | 0,936411807 | 0,086406508 |    |
| 848 | RRPTPATVA      | Protein phosphatase inhibitor 4                                | 1,390518205 | 0,237725826 |    |
| 849 | SFKLSGFSF      | myristolated alanine-rich C-kinase substrate                   | 0,947218885 | 0,061864206 |    |
| 850 | QEKESERLA      | Beta-2 adrenergic receptor                                     | 0,925052358 | 0,062954157 |    |
| 851 | RRVSV          | pyruvate kinase                                                | 2,727494284 | 1,211307007 |    |
| 852 | APFTPGGRR      | Myelin basic protein                                           | 2,614625684 | 0,932351406 |    |
| 853 | DEKLSEILG      | RNA polymerase alpha                                           | 1,05826382  | 0,124486714 |    |
| 854 | FGHNTIDAV      | bumetanide-sensitive sodium-(potassium)-chloride cotransporter | 0,935985817 | 0,112053107 |    |
| 855 | RDEEYGYEA      | Gamma-aminobutyric-acid receptor gamma-2                       | 1,790282793 | 0,461158272 |    |
| 856 | AVRRSDAA       | Troponin I                                                     | 1,31100366  | 0,175077923 |    |
| 857 | TKRSGSV        | phosphorylase b kinase beta                                    | 1,644492058 | 0,29298673  |    |
| 858 | RRKATQVGE      | vasodilator-stimulated phosphoprotein                          | 0,942844578 | 0,160131664 |    |
| 859 | SEGDSSEGE      | Serum response factor                                          | 1,304843597 | 0,179539664 |    |
| 860 | PLDRSSHAQ      | Insulin Receptor (IR)                                          | 1,018500226 | 0,15033197  |    |
| 861 | RRASS          | pyruvate kinase                                                | 2,22000111  | 0,699759297 |    |
| 862 | STPLSPTRI      | Lamin A/C                                                      | 1,60192107  | 0,279508973 |    |
| 863 | TPPLSPSRR      | Myc proto-oncogene protein                                     | 3,691045869 | 2,102912614 |    |
| 864 | VKRISGLIY      | Histone H4                                                     | 1,424050875 | 0,226286838 |    |
| 865 | RAAASRARQ      | cAMP response element-binding protein CRE-BP3                  | 1,73776719  | 0,09569802  | On |
| 866 | SPRTPGGRR      | Myelin basic protein                                           | 3,904431678 | 1,662004473 |    |
| 867 | RRRRSVA        | pyruvate kinase                                                | 4,715832536 | 1,655985536 | On |
| 868 | VRFESIRLP      | Choriogonadotropin beta                                        | 1,641331699 | 0,142064119 | On |
| 869 | SRKESYSVY      | Histone H2B                                                    | 1,095378809 | 0,140164967 |    |
| 870 | LSELSRRRI      | eukaryotic translation initiation factor 4F                    | 3,708406909 | 1,022246534 | On |
| 871 | PSPSSRVTV      | Lamin B1                                                       | 1,400360375 | 0,173652089 |    |
| 872 | SSVPTPSPL      | casein kinase II                                               | 0,944175927 | 0,098872935 |    |
| 873 | TNEEYLDLS      | Fibroblast growth factor receptor 2                            | 1,426252724 | 0,300926865 |    |
| 874 | LSRFSWGAE      | Myelin basic protein                                           | 1,136424481 | 0,184760277 |    |
| 875 | PTKRSPTKR      | Histone H2B.1                                                  | 1,407182424 | 0,010245952 | On |
| 876 | KISASRLQ       | troponin I                                                     | 2,633412966 | 0,666116233 | On |
| 877 | KSFGSPNRI      | cell division protein kinase 7                                 | 2,175723213 | 0,677019105 |    |
| 878 | KRKQISVAGL     | Glycogen phosphorylase                                         | 1,755222548 | 0,196947114 | On |
| 879 | SQHSTPPKK      | Large T antigen                                                | 1,18699441  | 0,095385929 |    |
| 880 | KKIDSFASN      | acetyl-CoA carboxylase                                         | 1,415793828 | 0,364289419 |    |
| 881 | KTETSQVAP      | Rhodopsin                                                      | 0,928838913 | 0,183600666 |    |
| 882 | PAAPSPGSS      | synapsins IA and IB                                            | 1,156830052 | 0,052841226 | On |
| 883 | IGRFSEPHA      | cGMP-dependent protein kinase (PKG)                            | 1,070693264 | 0,169491825 |    |
| 884 | MQLKSEIKQ      | phosphorylase b kinase alpha                                   | 1,090974396 | 0,146546057 |    |
| 885 | EEQEYIKTV      | Annexin I                                                      | 1,642569084 | 0,212717559 | On |
| 886 | ERRPSNVSQ      | Sodium channel protein type II alpha                           | 1,087592754 | 0,147671224 |    |
| 887 | IPHPTVRT       | Retinoblastoma-associated protein                              | 1,778894057 | 0,286177461 | On |
| 888 | NDSTSVSAV      | muscarinic acetylcholine receptor M2                           | 0,88807583  | 0,11127669  |    |
| 889 | PYKFPSSPLRIPGZ |                                                                | 0,766853475 | 0,049689393 |    |
| 890 | GRPITPPRN      | ser/thr protein phosphatase PP1-alpha                          | 2,114838222 | 0,654995368 |    |
| 891 | ARTKRSGSV      | phosphorylase b kinase beta                                    | 2,890217944 | 0,86226129  | On |
| 892 | DLPGTEDFV      | Beta-2 adrenergic receptor                                     | 1,657856626 | 0,257771999 | On |
| 893 | GALYSGSEG      | Serum response factor                                          | 1,350785834 | 0,179378914 |    |
| 894 | GRVLTLP RS     | Insulin Receptor (IR)                                          | 2,927940015 | 1,229268782 |    |
| 895 | EKESSNDS       | muscarinic acetylcholine receptor M2                           | 1,005086289 | 0,128454051 |    |

|     |                |                                                         |             |             |    |
|-----|----------------|---------------------------------------------------------|-------------|-------------|----|
| 896 | ERNLSFEIK      | protein-tyrosine phosphatase G1                         | 0,977999553 | 0,049290906 |    |
| 897 | RRRRSRRAS      | Protamine Z                                             | 3,022015764 | 1,791643846 |    |
| 898 | SIYSSDDDE      | Myb proto-oncogene protein                              | 2,013386993 | 0,288305816 | On |
| 899 | HGYSLG         | Lysozyme C                                              | 1,173621759 | 0,091949283 |    |
| 900 | AAASFKAQR      |                                                         | 2,202522939 | 0,216892861 | On |
| 901 | ARKFSSARP      | Sodium channel protein                                  | 2,643117654 | 0,543060939 | On |
| 902 | DKEYYSVHN      | Receptor tyrosine kinase for hepatocyte growth factor   | 1,198381203 | 0,084047061 |    |
| 903 | FRKLSFTES      |                                                         | 1,317102943 | 0,116953735 | On |
| 904 | RFHKSSKDS      | myelin                                                  | 1,106503774 | 0,176601571 |    |
| 905 | RAKRSGSV       | phosphorylase b kinase beta                             | 2,561861022 | 0,125290515 | On |
| 906 | KSESSQK        | 40S ribosomal protein S6                                | 1,216553439 | 0,134482132 |    |
| 907 | RRRLSDSNF      | synapsins                                               | 1,21372405  | 0,066285625 | On |
| 908 | SGKTSPSSS      | phosphorylcholine transferase                           | 0,97554189  | 0,20062682  |    |
| 909 | KSRRTI         | Interleukin-2 receptor alpha                            | 1,552679937 | 0,265430219 |    |
| 910 | TAILE          | Photosystem Q(B)                                        | 0,979717175 | 0,077314207 |    |
| 911 | SYPLSPLSD      | Cytosolic phospholipase A2                              | 1,613367264 | 0,195212077 | On |
| 912 | TRQASQAGP      | synapsins IA and IB                                     | 1,181765989 | 0,172789788 |    |
| 913 | VRVYTHEVV      | cell division control protein 2                         | 1,143735073 | 0,138631941 |    |
| 914 | RENEYMPMA      | Middle T antigen                                        | 0,99647424  | 0,057126223 |    |
| 915 | GRGLSLSR       | Myelin basic protein                                    | 3,623041587 | 1,35369975  |    |
| 916 | YIYGSFK        |                                                         | 1,350110146 | 0,173951241 |    |
| 917 | VTRSSAVRL      | vimentin                                                | 2,318356848 | 0,1987326   | On |
| 918 | SRRLSQETG      | cystic fibrosis transmembrane conductance regulator     | 1,12084542  | 0,15009306  |    |
| 919 | PASPSPQRQ      | synapsins IA and IB                                     | 1,253112452 | 0,212544621 |    |
| 920 | PWRITDNEL      | bumetanide-sensitive sodium-(potassium)-chloride cotran | 1,259098617 | 0,078989121 | On |
| 921 | STSVSAVAS      | muscarinic acetylcholine receptor M2                    | 1,097703687 | 0,06998523  |    |
| 922 | TRIPSAKKY      | astrocytic phosphoprotein PEA-15                        | 1,958505417 | 0,130453925 | On |
| 923 | PGGSTPVSS      | casein kinase II                                        | 0,898984658 | 0,143194268 |    |
| 924 | QGTLKIFK       | Myelin basic protein                                    | 1,839353052 | 0,04642761  | On |
| 925 | KKRLSVERI      | DNA topoisomerase II alpha                              | 2,552401518 | 0,424869951 | On |
| 926 | KYRKSSLKS      | spermatid nuclear transition protein 4                  | 2,090258264 | 0,227416741 | On |
| 927 | PLSRRLSVA      | glycogen synthase                                       | 1,393013574 | 0,1918095   |    |
| 928 | SRLHSVRER      | sucrose synthase 2                                      | 2,860673158 | 0,509578616 | On |
| 929 | KNDKSKTWQ      | eukaryotic translation initiation factor 4E             | 1,36246017  | 0,179810697 |    |
| 930 | LGGGTFDIS      | Heat Shock Protein 70                                   | 1,368204495 | 0,28872858  |    |
| 931 | QHLKSVMLQ      | Troponin I                                              | 1,281130533 | 0,112082956 |    |
| 932 | ISQESSEEE      | high mobility group protein                             | 0,86769635  | 0,056234193 |    |
| 933 | NGDASPAAA      | myristolated alanine-rich C-kinase substrate (MARCKS)   | 0,762299451 | 0,091788305 |    |
| 934 | EHVSSSEES      | Alpha-S2 casein                                         | 0,828914949 | 0,120976072 |    |
| 935 | ESMESYEVS      | Matrix Gla-protein                                      | 1,684080396 | 0,197058409 | On |
| 936 | KQLASFEIY      | Cystatin S                                              | 0,761081287 | 0,136438712 |    |
| 937 | NMPSSDDGL      | muscarinic acetylcholine receptor M2                    | 0,702515605 | 0,167018443 |    |
| 938 | PYKFPSSPLRIPGZ |                                                         | 0,682495841 | 0,124675018 |    |
| 939 | GSLKSRKRA      | spermatid nuclear transition protein 1                  | 2,786412226 | 0,366991728 | On |
| 940 | AVRRSDRAY      | Troponin I                                              | 1,875313201 | 0,151502003 | On |
| 941 | DPTMSKSKK      | eukaryotic translation initiation factor 2 beta         | 1,587331517 | 0,118259851 | On |
| 942 | GGGTSPVFP      | Desmin                                                  | 0,731030706 | 0,110703983 |    |
| 943 | GSTSTPAPS      | ATP-citrate (pro-S-) lyase                              | 0,514874635 | 0,194779402 |    |
| 944 | EGGRTVGAG      | Elongation factor Tu-A and B                            | 0,506506225 | 0,144116309 |    |
| 945 | ESHESLESY      | Matrix Gla-protein                                      | 1,264326327 | 0,067442367 | On |
| 946 | RVLESFRAA      | voltage-gated potassium channel                         | 1,73505994  | 0,053608557 | On |
| 947 | SMANSFVGT      | mitogen-activated protein kinase kinase 1               | 0,965107872 | 0,003118198 |    |
| 948 | RRPSPA         | pyruvate kinase                                         | 1,73666615  | 0,058673774 | On |
| 949 | ADSFSLNDA      | galectin-3                                              | 1,222410989 | 0,13892155  |    |
| 950 | ATSASPPQK      | p53                                                     | 1,066068148 | 0,151576901 |    |
| 951 | DNLYYWDQD      | Receptor tyrosine-protein kinase erbB-2                 | 1,352766909 | 0,12996806  | On |

|      |                |                                                 |             |             |    |
|------|----------------|-------------------------------------------------|-------------|-------------|----|
| 952  | GDSSYKNIH      | macrophage colony stimulating factor 1 receptor | 0,891878224 | 0,3718657   |    |
| 953  | RKRLSQDAY      | Neutrophil cytosol factor 6                     | 0,796499502 | 0,040638506 |    |
| 954  | ASGSFKL        | Histone H1.1                                    | 0,959543229 | 0,046161366 |    |
| 955  | LRRGSLG        | pyruvate kinase                                 | 2,454059694 | 0,508248651 | On |
| 956  | RRSVSEAAL      | hormone sensitive lipase                        | 0,740299065 | 0,019914808 |    |
| 957  | SLAMSPRQR      | Protein phosphatase inhibitor 5                 | 1,328060861 | 0,190861072 |    |
| 958  | RRASLG         |                                                 | 2,114403004 | 0,257643693 | On |
| 959  | AAVDTSEI       | Prothymosin                                     | 1,160623976 | 0,070576492 |    |
| 960  | TESQSLTLT      | Beta casein                                     | 1,131313722 | 0,051998154 |    |
| 961  | TTRVTPLRT      | Desmin                                          | 2,38159853  | 0,551248009 | On |
| 962  | WTADSGEGD      | Fibrinogen alpha                                | 1,676477216 | 0,299725486 |    |
| 963  | RHRDTGILD      | Myelin basic protein                            | 0,964284023 | 0,090785541 |    |
| 964  | NRIYTHQVV      | cell division protein kinase 7                  | 1,587396057 | 0,068988336 | On |
| 965  | LRKASLG        | pyruvate kinase                                 | 1,288413432 | 0,322857908 |    |
| 966  | YHGHSMSDP      | pyruvate dehydrogenase E1                       | 0,79971214  | 0,29979849  |    |
| 967  | SSEESIISQ      | Alpha-S2 casein                                 | 1,340508393 | 0,171715235 |    |
| 968  | PKRGSKGKD      | Myelin basic protein                            | 1,170619241 | 0,072163487 |    |
| 969  | LGSALRRR       | vimentin                                        | 5,952765926 | 1,150751198 | On |
| 970  | TDESDNEI       | lower matrix phosphoprotein                     | 1,778105136 | 0,124749969 | On |
| 971  | TRSVSSSSY      | vimentin                                        | 1,778282002 | 0,345190805 |    |
| 972  | PPRRSSIRN      | Neutrophil cytosol factor 7                     | 5,090845472 | 2,161776423 |    |
| 973  | RTKGSQSV       | phosphorylase b kinase beta                     | 2,273505692 | 0,466993107 | On |
| 974  | KRAASPRKS      | Histone H5                                      | 3,210944923 | 0,794015082 | On |
| 975  | LMAPSEEDH      | insulin-like growth factor binding protein 2    | 1,140036939 | 0,089209079 |    |
| 976  | QNPVYHNQP      | EGF Receptor                                    | 1,440060325 | 0,019207712 | On |
| 977  | SRSRSRSPG      | Lamin B receptor                                | 5,766214415 | 1,186780937 | On |
| 978  | KRKVSSAEG      | Nonhistone chromosomal protein HMG-14           | 2,119387986 | 0,407898155 | On |
| 979  | LQDDYEDMM      | Band 3 anion transport protein                  | 1,880307732 | 0,466579479 |    |
| 980  | QRRSSEGST      | Volt.-dep. L-type calcium channel alpha-1S      | 0,859576146 | 0,177819806 |    |
| 981  | GVLRRASVA      | pyruvate kinase                                 | 1,833790747 | 0,274867756 | On |
| 982  | KRPSLRAKA      | Myelin basic protein                            | 2,477986348 | 0,18782747  | On |
| 983  | EASTTVSKT      | Rhodopsin                                       | 1,0708872   | 0,280594323 |    |
| 984  | ELSNYIAMG      | Insulin receptor substrate 9                    | 0,961849945 | 0,098001142 |    |
| 985  | HHHATPSPP      | Myb proto-oncogene protein                      | 1,015064087 | 0,184779793 |    |
| 986  | KTETSQVAP      | Rhodopsin                                       | 0,804810938 | 0,114393161 |    |
| 987  | PYKFPSSPLRIPGZ |                                                 | 0,872314761 | 0,065454295 |    |
| 988  | GGSVTKKRK      | Lamin C                                         | 2,116905695 | 0,741004895 |    |
| 989  | AKRISGKMA      | cell division control protein 2                 | 1,538263353 | 0,197691376 | On |
| 990  | DDPSYVNVQ      | Adaptor molecule SHC                            | 0,981361057 | 0,085080565 |    |
| 991  | EVEKSPVKS      | neurofilament triplet M                         | 0,89712193  | 0,147122576 |    |
| 992  | GKSSSYSKQ      | Fibrinogen alpha                                | 1,410596372 | 0,177386236 |    |
| 993  | DSRSSLIRK      | multidrug resistance protein 3                  | 1,496538917 | 0,25235533  |    |
| 994  | EKAKSPVPK      | neurofilament triplet M                         | 1,280271679 | 0,171881455 |    |
| 995  | RQRKSRTTI      | Interleukin-2 receptor alpha                    | 2,182622603 | 0,294149135 | On |
| 996  | SAYATVKAY      | Annexin II                                      | 0,82465839  | 0,161363102 |    |
| 997  | NTDGSTDYG      | Lysozyme C                                      | 1,25872192  | 0,148257043 |    |
| 998  | KRTRLR         | EGF Receptor                                    | 2,345107111 | 0,198088957 | On |
| 999  | AGPTSARDG      | RNA polymerase alpha                            | 0,751883997 | 0,138766728 |    |
| 1000 | DAPDPELL       | Tyrosine-protein kinase Dash/Abl                | 1,059621601 | 0,139114459 |    |
| 1001 | ESSYSYEEI      | RNA polymerase alpha                            | 1,263746822 | 0,033504906 | On |
| 1002 | YSLGSALRP      | vimentin                                        | 0,979784752 | 0,25764701  |    |
| 1003 | SPHQSEDEE      | Glycogen [starch] synthase                      | 0,781363196 | 0,125683338 |    |
| 1004 | RKRRAE         | Histone H2B                                     | 1,473207398 | 0,145587858 | On |
| 1005 | RNASTNDSP      | Beta-2 adrenergic receptor                      | 0,849235077 | 0,090388815 |    |
| 1006 | SAELYSNAL      | platelet-derived growth factor receptor         | 0,960419752 | 0,065974197 |    |
| 1007 | NRQLSSGVS      | Heat Shock Protein 28                           | 0,980677166 | 0,196288405 |    |

|      |                |                                                           |             |             |    |
|------|----------------|-----------------------------------------------------------|-------------|-------------|----|
| 1008 | VGPDS          | p53                                                       | 0,881325516 | 0,007904988 |    |
| 1009 | SSSESGAPE      | Clathrin light chain B                                    | 0,601082083 | 0,070439061 |    |
| 1010 | TKHIYSNLA      | Mast/stem cell growth factor receptor                     | 0,753679251 | 0,150185585 |    |
| 1011 | VDEMYREAP      | Myosin regulatory light chain 4                           | 0,813644547 | 0,093723385 |    |
| 1012 | YRKGLSKSR      | spermatid nuclear transition protein 1                    | 1,22045219  | 0,231079211 |    |
| 1013 | SNQEYLDLS      | Receptor tyrosine kinase                                  | 1,002526142 | 0,008187901 |    |
| 1014 | RKISASE        | cGMP-specific phosphodiesterase 3a                        | 0,939562972 | 0,074854134 |    |
| 1015 | VGFMTHEYVA     | mitogen-activated protein kinase 1                        | 0,983759077 | 0,158304308 |    |
| 1016 | QTASSPLSP      | Lamin                                                     | 0,621635658 | 0,150002303 |    |
| 1017 | LRKVKQEE       | vasodilator-stimulated phosphoprotein                     | 0,922867981 | 0,196675206 |    |
| 1018 | PQRATSNVF      | Myosin regulatory light chain 6                           | 0,857591137 | 0,139841677 |    |
| 1019 | SSNDSTSVS      | muscarinic acetylcholine receptor M2                      | 0,969106964 | 0,137213955 |    |
| 1020 | THVASVSDV      | acetyl-CoA carboxylase                                    | 0,902895082 | 0,112448253 |    |
| 1021 | LRLSTKYR       | protein-tyrosine phosphatase G1                           | 2,175664609 | 0,430554909 | On |
| 1022 | PRRDSTEGF      | fructose-1,6-bisphosphatase                               | 1,077095916 | 0,163409981 |    |
| 1023 | KAEEYILKK      | Acetylcholine receptor protein gamma                      | 0,909372427 | 0,048110814 |    |
| 1024 | KRPSFRAKA      | Myelin basic protein                                      | 2,526118548 | 0,353296656 | On |
| 1025 | PTPSAPSPQPKG   | Tyrosine 3-monooxygenase                                  | 0,855305254 | 0,121693101 |    |
| 1026 | QRYSSDPTG      | EGF Receptor                                              | 0,85328674  | 0,139713541 |    |
| 1027 | KEDTYTAHA      | Tyrosine-protein kinase abl-1                             | 0,898018971 | 0,150621084 |    |
| 1028 | KRRLSFSET      | Interleukin-1 alpha                                       | 1,681138252 | 0,179944094 | On |
| 1029 | KRAKAKTTKRR    | Myosin regulatory light chain 2                           | 4,497336022 | 1,10445714  | On |
| 1030 | HRQETVDAL      | calcium/calmodulin-dependent protein kinase type II alpha | 0,8713729   | 0,035448076 |    |
| 1031 | LNRMSFASN      | acetyl-CoA carboxylase                                    | 1,033933486 | 0,107558107 |    |
| 1032 | EEDTYTMPS      | Focal adhesion kinase                                     | 1,260052791 | 0,205202119 |    |
| 1033 | EQEYEDPD       | Band 3 anion transport protein                            | 1,388551689 | 0,153227728 | On |
| 1034 | HVSSSEESI      | Alpha-S2 casein                                           | 0,967429673 | 0,104595651 |    |
| 1035 | METPSQRRRA     | Lamin C                                                   | 1,409810081 | 0,162675273 | On |
| 1036 | PYKFPSSPLRIPGZ |                                                           | 0,957701216 | 0,047406351 |    |
| 1037 | GNFNYVEFT      | Myosin regulatory light chain 2                           | 1,365867141 | 0,237500981 |    |
| 1038 | APRTPGGRR      | Myelin basic protein                                      | 3,125164403 | 0,262096664 | On |
| 1039 | DGNGYISAA      | Calmodulin                                                | 1,112273894 | 0,138384093 |    |
| 1040 | FLTEYVATR      | extracellular signal-regulated kinase 2                   | 0,985655125 | 0,112661513 |    |
| 1041 | GRALSTRAQ      | Troponin I                                                | 2,093775043 | 0,569362268 |    |
| 1042 | EDRMSLVNS      | Cystatin S                                                | 0,905529192 | 0,258534431 |    |
| 1043 | ENPEYLGLD      | Receptor tyrosine-protein kinase erbB-2                   | 1,381747127 | 0,1729867   |    |
| 1044 | RRLSSLRAS      | 40S ribosomal protein S6                                  | 2,863900004 | 0,786843157 | On |
| 1045 | SFKKSFKLS      | myristolated alanine-rich C-kinase substrate (MARCKS)     | 2,009205365 | 0,232199746 | On |
| 1046 | PSKKYAIKG      | Glutamyl aminopeptidase                                   | 0,89807217  | 0,060594087 |    |
| 1047 | RRPSV          | pyruvate kinase                                           | 1,579287151 | 0,181503521 | On |
| 1048 | APETPGGRR      | Myelin basic protein                                      | 1,654021693 | 0,050534098 | On |
| 1049 | DEEMSETAD      | Protein phosphatase inhibitor 2                           | 1,155980307 | 0,090138615 |    |
| 1050 | FFSSSESGA      | Clathrin light chain B                                    | 1,156624119 | 0,039122166 | On |
| 1051 | RDDTYTAHA      | Tyrosine-protein kinase Dash/Abl                          | 0,841751134 | 0,250722232 |    |
| 1052 | APTPGGRR       | Myelin basic protein                                      | 1,836574572 | 0,684014222 |    |
| 1053 | STNDSPL        | Beta-2 adrenergic receptor                                | 1,092446065 | 0,133060415 |    |
| 1054 | RRKASGPPV      | Histone H1.1                                              | 1,353944974 | 0,056329424 | On |
| 1055 | SEENSKKTV      | Alpha-S2 casein                                           | 0,859445939 | 0,097619646 |    |
| 1056 | PASPSPQRQ      | synapsins IA and IB                                       | 1,134504138 | 0,132288647 |    |
| 1057 | RRASR          | pyruvate kinase                                           | 2,553831483 | 0,117613369 | On |
| 1058 | STNEYMDMK      | Mast/stem cell growth factor receptor                     | 0,853681545 | 0,114771192 |    |
| 1059 | TPPLSPIDM      | Transcription factor AP-5                                 | 0,885864109 | 0,022040273 |    |
| 1060 | VKGATSDEE      | DNA topoisomerase II                                      | 0,964692235 | 0,137532138 |    |
| 1061 | QRATSNVFA      | Myosin regulatory light chain 5                           | 1,023226946 | 0,083262421 |    |
| 1062 | SPRKSPRKS      | Histone H6                                                | 2,247038061 | 0,080147837 | On |
| 1063 | RRRASVA        | pyruvate kinase                                           | 2,373118622 | 0,619161403 | On |

|      |                |                                                         |             |             |    |
|------|----------------|---------------------------------------------------------|-------------|-------------|----|
| 1064 | VTPSPPLGP      | casein kinase II                                        | 0,991156183 | 0,096416087 |    |
| 1065 | SRKDSLDDDS     | alpha-1B adrenergic receptor                            | 1,146322731 | 0,205093541 |    |
| 1066 | LSEHSSPEE      | Dopamine- and cAMP-regulated neuronal phosphoprotein    | 0,914092226 | 0,167001713 |    |
| 1067 | PSPKYPGPQ      | Chromogranin A                                          | 0,805981363 | 0,0383378   |    |
| 1068 | SSVLYTAVQ      | platelet-derived growth factor receptor                 | 0,899050605 | 0,07855795  |    |
| 1069 | TLSDSDDED      | N-myc proto-oncogene protein                            | 1,381492757 | 0,374408389 |    |
| 1070 | LSLDSQGRN      | Beta-2 adrenergic receptor                              | 0,971564261 | 0,177507102 |    |
| 1071 | PTKRSPQKG      | Histone H2B.1                                           | 1,11830659  | 0,155684077 |    |
| 1072 | KIQASFRGH      | neurogranin                                             | 2,593296638 | 0,441902577 | On |
| 1073 | KRSNSVDTS      | Glycogen [starch] synthase                              | 1,2911329   | 0,356272124 |    |
| 1074 | KRKQISGRGL     | Glycogen phosphorylase                                  | 1,337416639 | 0,114338571 | On |
| 1075 | SQESSEEEQ      | high mobility group protein                             | 0,9491078   | 0,195563932 |    |
| 1076 | KKDVTVPKA      | Histone H1                                              | 1,646407057 | 0,146133941 | On |
| 1077 | KSRWSGSQQ      | RAF proto-oncogene ser/thr-protein kinase               | 1,937501    | 0,283362969 | On |
| 1078 | LYSGSEGDS      | Serum response factor                                   | 1,503978696 | 0,153538173 | On |
| 1079 | IGHHSTSD       | 2-oxoisovalerate dehydrogenase alpha                    | 0,90959576  | 0,08389237  |    |
| 1080 | MPGETPPLS      | Transcription factor AP-3                               | 1,060564295 | 0,156893117 |    |
| 1081 | EEPVYEAE       | Hematopoietic cell-specific LYN substrate               | 1,946618043 | 0,386049065 | On |
| 1082 | ERRNSILTE      | cystic fibrosis transmembrane conductance regulator     | 1,170452721 | 0,099010564 |    |
| 1083 | INETSQHHD      | vimentin                                                | 0,89215238  | 0,055402548 |    |
| 1084 | NDSNYVVKG      | Mast/stem cell growth factor receptor                   | 0,885910304 | 0,09407568  |    |
| 1085 | PYKFPSSPLRIPGZ |                                                         | 0,882938212 | 0,053826218 |    |
| 1086 | GRNASTNDS      | Beta-2 adrenergic receptor                              | 1,025821022 | 0,123983855 |    |
| 1087 | ARSGSSTYS      | parathyroid hormone/parathyroid hormone-related peptide | 1,896347552 | 0,402385114 |    |
| 1088 | DLTSPDVG       | Transcription factor AP-4                               | 1,231457448 | 0,116103519 |    |
| 1089 | GAGNSLRTA      | Lamin C                                                 | 1,459700652 | 0,16396506  | On |
| 1090 | GRTWTLAGT      | cGMP-dependent protein kinase (PKG)                     | 1,217644066 | 0,205532078 |    |
| 1091 | EEHVYSFPN      | Paxillin                                                | 1,154346437 | 0,126931521 |    |
| 1092 | ERHHSIDAQ      | phosphoenolpyruvate carboxylase                         | 1,010089575 | 0,115027598 |    |
| 1093 | RRRRAASVA      | pyruvate kinase                                         | 3,211364203 | 0,071448178 | On |
| 1094 | SIRDTPAKN      | Nucleophosmin                                           | 0,987542919 | 0,107952479 |    |
| 1095 | GGYSLG         | Lysozyme C                                              | 1,214410374 | 0,059833446 | On |
| 1096 | AAASFKAKK      |                                                         | 1,738101228 | 0,08412857  | On |
| 1097 | ARDIYKNDY      | Ros proto-oncogene tyrosine kinase                      | 1,35964561  | 0,17517697  |    |
| 1098 | DKEVSDDEA      | HSP90-alpha                                             | 1,274041589 | 0,226872241 |    |
| 1099 | FRKFTKSER      | cGMP-dependent protein kinase (PKG)                     | 2,513502507 | 0,35774879  | On |
| 1100 | RFFGSDRGA      | Myelin basic protein                                    | 1,890093289 | 0,229568372 | On |
| 1101 | PRTPGGRR       | Myelin basic protein                                    | 1,455983058 | 0,17272488  | On |
| 1102 | KRRVSEV        | Erythrodihydroneopterin triphosphate synthetase         | 1,726142289 | 0,498725615 |    |
| 1103 | RRRGSSIPQ      | 6-phosphofructo-2-kinase/fructose-2,6-bisphosphatase    | 1,972929674 | 0,177913858 | On |
| 1104 | SGDTPRHL       | Microtubule-associated protein tau                      | 1,072512696 | 0,043847925 |    |
| 1105 | KQITVR         | Glycogen phosphorylase                                  | 1,789660112 | 0,110074448 | On |
| 1106 | SSKRA          | Myosin regulatory light chain 2                         | 2,05659051  | 0,104590799 | On |
| 1107 | SVSSSSYRR      | vimentin                                                | 4,106518995 | 0,624791917 | On |
| 1108 | TRQASISGP      | synapsins                                               | 1,332490007 | 0,201884451 |    |
| 1109 | VRTYTHEVV      | Cell division protein kinase 2                          | 1,35403944  | 0,077372796 | On |
| 1110 | REILSRRPS      | cAMP response element binding protein                   | 3,152077333 | 0,906775209 | On |
| 1111 | GASGSFKL       | Histone H1.1                                            | 1,225679456 | 0,239572599 |    |
| 1112 | VRRSDRA        | Troponin I                                              | 1,789042077 | 0,085552459 | On |
| 1113 | VTRRTLSDM      | 6-phosphofructokinase                                   | 1,972424836 | 0,138040547 | On |
| 1114 | SRRGSESSE      | phosphoprotein phosphatase 1, 3a                        | 1,517037705 | 0,275042769 |    |
| 1115 | PASAYGSVK      | Annexin II                                              | 1,032636777 | 0,224318999 |    |
| 1116 | PWQVSLRTR      | Plasminogen                                             | 1,273274822 | 0,071992927 | On |
| 1117 | STSRSLYSS      | vimentin                                                | 3,495789562 | 1,033782553 | On |
| 1118 | TRGGSLERS      | alpha-1B adrenergic receptor                            | 1,5059702   | 0,031636793 | On |
| 1119 | PFKLSGLSF      | MARCKS-related protein                                  | 1,048745418 | 0,091018593 |    |



|      |                |                                                       |             |             |    |
|------|----------------|-------------------------------------------------------|-------------|-------------|----|
| 1120 | QEQEYVQAV      | Annexin I                                             | 1,218472189 | 0,16657545  |    |
| 1121 | KKRFSFKKS      | myristolated alanine-rich C-kinase substrate (MARCKS) | 4,50531356  | 1,044109232 | On |
| 1122 | KYLASASTM      | Myelin basic protein                                  | 1,57327171  | 0,20432885  | On |
| 1123 | PRRVSRRRR      | Protamine YII                                         | 1,346205785 | 0,080369592 | On |
| 1124 | SRKRSGEAT      | 6-phosphofructokinase                                 | 1,34048899  | 0,232673557 |    |
| 1125 | KMKDSDSEE      | Calmodulin                                            | 1,16362781  | 0,050662138 | On |
| 1126 | LFRLSEHSS      | Dopamine- and cAMP-regulated neuronal phosphoprotein  | 0,881371196 | 0,09724026  |    |
| 1127 | QDENTVSTS      | muscarinic acetylcholine receptor M2                  | 0,985136037 | 0,198105089 |    |
| 1128 | ISITSRKAQ      | GTP-binding protein era                               | 1,372128178 | 0,105071861 | On |
| 1129 | NFLKTSAGS      | Carbon catabolite derepressing protein kinase         | 1,151464576 | 0,103810965 |    |
| 1130 | EHIPYTHMN      | Insulin Receptor (IR)                                 | 1,305411554 | 0,175681846 |    |
| 1131 | ESMESYELN      | Matrix Gla-protein                                    | 1,717983344 | 0,150735964 | On |
| 1132 | KKRFSFKKS      | myristolated alanine-rich C-kinase substrate (MARCKS) | 3,476196419 | 0,673591143 | On |
| 1133 | NKQGYKARQ      | Protein kinase C delta                                | 1,786629382 | 0,344133775 |    |
| 1134 | PYKFPSSPLRIPGZ |                                                       | 1,00129229  | 0,126583767 |    |
| 1135 | GSSTSSRPS      | vimentin                                              | 1,134445714 | 0,203886022 |    |
| 1136 | AVMVSHYIH      | Prolactin                                             | 1,815600449 | 0,074011319 | On |
| 1137 | DPPGTESFV      | Beta-2 adrenergic receptor                            | 1,703660885 | 0,161252961 | On |
| 1138 | GFKRSYEEH      | Insulin Receptor (IR)                                 | 1,314686612 | 0,226786139 |    |
| 1139 | GSRRRRRRY      | protamine                                             | 3,181274949 | 0,755016442 | On |
| 1140 | EFPLSPPKK      | stathmin                                              | 1,648929716 | 0,101158044 | On |
| 1141 | ESEKTKTKE      | myosin II heavy chain                                 | 1,012822464 | 0,115272794 |    |
| 1142 | RSSMSGLHL      | acetyl-CoA carboxylase                                | 1,475171622 | 0,075746403 | On |
| 1143 | SLVNSRAQE      | Cystatin S                                            | 1,05756153  | 0,116503363 |    |
| 1144 | RRATVA         | pyruvate kinase                                       | 1,964150763 | 0,191275479 | On |
| 1145 | ADSFSLHDA      | galectin-3                                            | 1,461872008 | 0,102490198 | On |
| 1146 | ATRRSYVSS      | glial fibrillary acidic protein                       | 2,367158579 | 0,562469305 | On |
| 1147 | DNIDSQGRN      | Beta-2 adrenergic receptor                            | 1,220725427 | 0,084860803 |    |
| 1148 | GDSSEGESE      | Serum response factor                                 | 1,3851855   | 0,470804942 |    |
| 1149 | RKRKSSQAL      | Thyroid hormone receptor alpha                        | 1,913150607 | 0,31013948  | On |
| 1150 | AKRSRKE        | Histone H2B                                           | 1,488236143 | 0,3756332   |    |
| 1151 | LRRATLG        | pyruvate kinase                                       | 1,941107924 | 0,269406185 | On |
| 1152 | RRSSSVGYI      | Acetylcholine receptor protein delta                  | 2,16999533  | 0,322666998 | On |
| 1153 | SKVTSKAGS      |                                                       | 1,5761972   | 0,228880452 | On |
| 1154 | RGYSLG         | Lysozyme C                                            | 1,597314874 | 0,342605708 |    |
| 1155 | AARTPGGRR      | Myelin basic protein                                  | 2,346613107 | 0,273134614 | On |
| 1156 | TEPQYQPGE      | Proto-oncogene tyrosine-protein kinase Fyn            | 1,271898726 | 0,380106519 |    |
| 1157 | TTRRSASKT      | Fibrinogen alpha                                      | 2,195385094 | 0,297071377 | On |
| 1158 | WLTKTPEGN      | Actin and myosin binding protein                      | 1,215687147 | 0,062026747 | On |
| 1159 | RGRSSVYSA      | myosin heavy chain                                    | 2,802814153 | 1,715812966 |    |
| 1160 | RKRTLRRRL      | EGF Receptor                                          | 3,102584561 | 0,746511592 | On |
| 1161 | LRHASLG        | pyruvate kinase                                       | 1,277776003 | 0,094454874 | On |
| 1162 | YNGYSSNS       | Beta-2 adrenergic receptor                            | 1,380565035 | 0,246924371 |    |
| 1163 | SRTPSLPTP      | Microtubule-associated protein tau                    | 1,070962867 | 0,06380412  |    |
| 1164 | PKKGSKKAV      | Histone H2B                                           | 1,242040556 | 0,077379658 | On |
| 1165 | LELSDDDD       | Myosin heavy chain, nonmuscle type B                  | 1,581108576 | 0,164597883 | On |
| 1166 | TDDGYMPMS      | Insulin receptor substrate 10                         | 1,486020869 | 0,107399689 | On |
| 1167 | TRRLTGFLP      | Glycogen phosphorylase                                | 1,899794108 | 0,091518591 | On |
| 1168 | PPEKTEEEE      | somatostatin receptor type 5                          | 1,247731799 | 0,162647939 |    |
| 1169 | RTGRSGSV       | phosphorylase b kinase beta                           | 3,407324374 | 0,976014086 | On |
| 1170 | KQSPSSSPT      | phosphorylcholine transferase                         | 1,284985145 | 0,120673121 |    |
| 1171 | LLRPSRRVR      | somatostatin receptor type 6                          | 2,64498982  | 0,167835144 | On |
| 1172 | QMALTPVVV      | cell division protein kinase 4                        | 1,299785999 | 0,153204885 |    |
| 1173 | SRSRSPGRP      | Lamin B receptor                                      | 2,937286832 | 0,766446445 | On |
| 1174 | KRKRSRKES      | Histone H2B                                           | 2,8695513   | 0,130137616 | On |
| 1175 | LQAISPKQS      | phosphorylcholine transferase                         | 1,345890202 | 0,156094105 |    |



|      |           |                                            |             |             |  |
|------|-----------|--------------------------------------------|-------------|-------------|--|
| 1176 | QRRRSLEPP | Proto-oncogene tyrosine-protein kinase Src | 1,284360049 | 0,237889139 |  |
|------|-----------|--------------------------------------------|-------------|-------------|--|

**Suppl. Table 4. Average densitometry values for all substrates on the arrays for B cells and their Markov test of significance.**

| Peptide # | Sequence       | Source protein                                          | $\sum(x_1, x_2, \dots, x_9)/n$ | $\sigma(x_1, x_2, \dots, x_9)$ | Markov state |
|-----------|----------------|---------------------------------------------------------|--------------------------------|--------------------------------|--------------|
| 1         | HEYIYDPM       | platelet-derived growth factor receptor                 | 1,0495897                      | 0,131477121                    |              |
| 2         | KRPSVRAKA      | Myelin basic protein                                    | 2,403219253                    | 0,13276637                     | On           |
| 3         | EDNEYTARQ      | Tyrosine-protein kinase transforming protein SRC        | 1,26046425                     | 0,344327087                    |              |
| 4         | ENKLYGMSD      | Probable receptor with tyrosine-protein kinase activity | 0,583545902                    | 0,141331233                    |              |
| 5         | HRLLTLDPV      | Interleukin-1 receptor                                  | 0,625792837                    | 0,048734497                    |              |
| 6         | LEKKYVRRD      | macrophage colony stimulating factor 1 receptor         | 0,634785611                    | 0,069393415                    |              |
| 7         | PYKFPSSPLRIPGZ |                                                         | 0,610582474                    | 0,10682299                     |              |
| 8         | GKRQTEREK      | Troponin T                                              | 0,879174744                    | 0,013822448                    |              |
| 9         | APATSPKAE      | neuromodulin (GAP43)                                    | 0,856098039                    | 0,109650537                    |              |
| 10        | DEESEQGA       | tubulin                                                 | 0,887059295                    | 0,043270328                    |              |
| 11        | FFRRSKIAV      | glutamate receptor 2                                    | 0,977376772                    | 0,231080674                    |              |
| 12        | GMTEYVATR      | Mitogen-activated protein kinase FUS3                   | 0,588133173                    | 0,071547942                    |              |
| 13        | EAALYKNLL      | Mast/stem cell growth factor receptor                   | 0,684526903                    | 0,061280405                    |              |
| 14        | ELILSPRSK      | stathmin                                                | 0,928676786                    | 0,183743694                    |              |
| 15        | RRAVSEQDA      | Tyrosine 3-monooxygenase                                | 0,521744958                    | 0,010557276                    |              |
| 16        | SEDNSEDEI      | acetyl-CoA carboxylase                                  | 0,950743371                    | 0,140340937                    |              |
| 17        | PASLSRAKA      | phosphorylcholine transferase                           | 1,092521388                    | 0,111549933                    |              |
| 18        | RRASL          | pyruvate kinase                                         | 1,672745089                    | 0,157661655                    | On           |
| 19        | AKKMSTYNV      | myosin heavy chain                                      | 2,27691834                     | 0,526455265                    | On           |
| 20        | DDINSYEAW      | Coagulation factor IX                                   | 1,562817108                    | 0,467389952                    |              |
| 21        | ETRFDTRK       | elongation factor 2                                     | 0,927430737                    | 0,061596129                    |              |
| 22        | QLSTSEENS      | Alpha-S2 casein                                         | 0,585864277                    | 0,10118729                     |              |
| 23        | SPRKSPKKS      | Histone H1                                              | 1,72141563                     | 0,143729352                    | On           |
| 24        | RRKASGP        | Histone H1.1                                            | 1,247726635                    | 0,220988977                    |              |
| 25        | RQLRSPRRT      | ras-related protein Rab-4A                              | 2,382683876                    | 0,718647501                    |              |
| 26        | SAVASNMRD      | muscarinic acetylcholine receptor M2                    | 0,819136416                    | 0,140659525                    |              |
| 27        | RTPPPSG        | Myelin basic protein                                    | 0,757152766                    | 0,052420195                    |              |
| 28        | LRRAS          | Red cell/liver pyruvate kinase                          | 1,030136372                    | 0,069047006                    |              |
| 29        | SSTGSIDMV      | Microtubule-associated protein tau                      | 0,709004618                    | 0,018637687                    |              |
| 30        | TLASSFKRR      | glutamate (NMDA) receptor subunit zeta 1                | 2,442835995                    | 0,291635357                    | On           |
| 31        | VGAFSTVKG      | rhodopsin kinase                                        | 1,269994853                    | 0,140835633                    |              |
| 32        | YSGHMSMDP      | pyruvate dehydrogenase E1                               | 0,589356867                    | 0,073220613                    |              |
| 33        | SPGEYVNIE      | Insulin receptor substrate 1                            | 0,863512545                    | 0,033025359                    |              |
| 34        | RKRSAKE        | Histone H2B                                             | 1,472425423                    | 0,140021969                    | On           |
| 35        | VINETSQHH      | vimentin                                                | 0,56522457                     | 0,072744823                    |              |
| 36        | SPVVSQDTS      | Microtubule-associated protein tau                      | 0,582472346                    | 0,061118192                    |              |
| 37        | LRRFSLATM      | Cytochrome P450 2B1                                     | 1,780930847                    | 0,390292061                    |              |
| 38        | PRPASVPPS      | Glycogen [starch] synthase                              | 1,008240619                    | 0,125707319                    |              |
| 39        | SSRPSSNRS      | vimentin                                                | 1,279076435                    | 0,173994251                    |              |
| 40        | TKFASDDEH      | Lupus La protein                                        | 0,714116857                    | 0,148109511                    |              |
| 41        | LSDDSFIED      | DNA topoisomerase II                                    | 1,261500163                    | 0,317592327                    |              |
| 42        | PSPKTPPGS      | Microtubule-associated protein tau                      | 0,649637477                    | 0,154473685                    |              |
| 43        | KDIGSESTE      | Alpha-S1 casein                                         | 0,92518513                     | 0,140709719                    |              |
| 44        | KRRGSVPIL      | erythrocyte protein 4.2                                 | 3,068270585                    | 0,499144635                    | On           |
| 45        | KRAKAKAKKR     | Myosin regulatory light chain 2                         | 5,148954407                    | 0,505713487                    | On           |
| 46        | QSYSSQRV       | Desmin                                                  | 1,024791537                    | 0,054872192                    |              |
| 47        | KGTGYIKTE      | Signal Transducer and Activator of Transcription 1      | 1,402475231                    | 0,054461282                    | On           |
| 48        | KRSLSEMEI      | Serum response factor                                   | 0,705973324                    | 0,027198679                    |              |
| 49        | KRKQGSVRGL     | Glycogen phosphorylase                                  | 1,936801834                    | 0,267358137                    | On           |
| 50        | HTRDSEAQR      | erythrocyte band 7                                      | 0,554621807                    | 0,211298904                    |              |
| 51        | MAEVSWKVL      | Phosphorylase b kinase beta                             | 0,596002534                    | 0,054499972                    |              |
| 52        | EEGISQESS      | high mobility group protein                             | 0,700508947                    | 0,134993515                    |              |
| 53        | EQQQTEDEL      | Beta casein                                             | 0,850964466                    | 0,115749166                    |              |
| 54        | IGEGTYGVV      | Cell division protein kinase 2                          | 0,812103556                    | 0,170470398                    |              |
| 55        | MMPYVVVTR      | Stress-activated protein kinase JNK1                    | 0,765414011                    | 0,257347965                    |              |

|     |                |                                                         |             |             |    |
|-----|----------------|---------------------------------------------------------|-------------|-------------|----|
| 56  | PYKFPSSPLRIPGZ |                                                         | 0,760736685 | 0,191647724 |    |
| 57  | GQEVYVKKT      | PTK receptor for angiotensin 1 (TEK)                    | 0,954600041 | 0,150051157 |    |
| 58  | AQETSGEEI      | insulin-like growth factor binding protein 1            | 0,966693393 | 0,223878517 |    |
| 59  | DKAKSRPSL      | fructose-1,6-bisphosphatase                             | 1,228596485 | 0,27465868  |    |
| 60  | FPVSYSSSG      | Probable receptor with tyrosine-protein kinase activity | 0,779467744 | 0,269448127 |    |
| 61  | GRLSSMAMI      | myosin light chain kinase                               | 0,922635576 | 0,032980122 |    |
| 62  | EEDLSDENI      | transcription factor BAF1                               | 0,704484288 | 0,236909758 |    |
| 63  | EPGPYAQPS      | Proto-oncogene C-crk                                    | 0,603358625 | 0,181634621 |    |
| 64  | RRRASQLKV      | Gamma-aminobutyric-acid receptor beta                   | 0,949919304 | 0,176465468 |    |
| 65  | SGADYPDEL      | Trypsin I                                               | 1,540559092 | 0,587174084 |    |
| 66  | KQISVR         | Glycogen phosphorylase                                  | 2,849033645 | 0,427330274 | On |
| 67  | SLKDH          | L-lactate dehydrogenase M                               | 0,941429283 | 0,202503183 |    |
| 68  | APRTAGGRR      | Myelin basic protein                                    | 2,325927193 | 0,783456267 |    |
| 69  | DGHEYIYVD      | platelet-derived growth factor receptor                 | 0,933276557 | 0,169035083 |    |
| 70  | FKRSYEEHI      | Insulin Receptor (IR)                                   | 0,660826091 | 0,165283694 |    |
| 71  | REARSRAST      | cAMP-dependent protein kinase II (PKA)                  | 1,323158491 | 0,128337626 | On |
| 72  | DRVYVHPF       | Angiotensinogen                                         | 0,782572714 | 0,108631893 |    |
| 73  | VRRSDAA        | Troponin I                                              | 0,893883297 | 0,220508437 |    |
| 74  | RRKMSRGLP      | Volt.-dep. L-type calcium channel alpha-1S              | 1,445575426 | 0,275915751 |    |
| 75  | SEVPYREVQ      | Tyrosine-protein kinase Src64B (hom MAP3K10)            | 0,769766022 | 0,017968203 |    |
| 76  | PRRASATSS      | Glycogen [starch] synthase                              | 1,083483836 | 0,1537415   |    |
| 77  | RRLSI          | phosphorylase b kinase alpha                            | 2,245003824 | 0,776296493 |    |
| 78  | STLSLSPFYL     | Alpha crystallin B                                      | 0,874974493 | 0,096745193 |    |
| 79  | TRDIYETDY      | Insulin Receptor (IR)                                   | 1,793485717 | 0,59849003  |    |
| 80  | VPTLSTFRT      | Desmin                                                  | 0,989192537 | 0,302310251 |    |
| 81  | RASTSKSES      | 40S ribosomal protein S6                                | 0,780626383 | 0,0876947   |    |
| 82  | SPSSSPTHE      | phosphorylcholine transferase                           | 0,699180027 | 0,196079955 |    |
| 83  | STNDSL         | Beta-2 adrenergic receptor                              | 0,905503519 | 0,17566505  |    |
| 84  | VRTFTHEVV      | Cell division protein kinase 2                          | 0,80753424  | 0,109617093 |    |
| 85  | SRKMSVQEY      | phosducin                                               | 0,799287485 | 0,196903253 |    |
| 86  | LSGLSFKRN      | MARCKS-related protein                                  | 1,735893639 | 0,100560925 | On |
| 87  | PTGTTQQRK      | Kinesin-related motor protein Eg5                       | 0,784171113 | 0,151400153 |    |
| 88  | STLASSFKR      | glutamate (NMDA) receptor subunit zeta 2                | 1,748407988 | 0,6274731   |    |
| 89  | TPPKSPSSA      | Microtubule-associated protein tau                      | 0,703710103 | 0,079202422 |    |
| 90  | PAAVSEHGD      | Na+/K+ ATPase 1                                         | 0,850376339 | 0,203272359 |    |
| 91  | PVSPSLVQG      | muscarinic acetylcholine receptor M2                    | 0,77700538  | 0,154504618 |    |
| 92  | KKDASDDLD      | eukaryotic translation initiation factor 2 beta         | 0,670759646 | 0,061745768 |    |
| 93  | KSRPSLPLP      | fructose-1,6-bisphosphatase                             | 1,30939092  | 0,256649218 |    |
| 94  | LSVSSLPGL      | Glycogen [starch] synthase                              | 0,902946379 | 0,037992328 |    |
| 95  | SRHSSPHQS      | Glycogen [starch] synthase                              | 0,841171556 | 0,2510612   |    |
| 96  | KKPPTPPPE      | Large T antigen                                         | 0,984439643 | 0,049701309 |    |
| 97  | KVPQTPLHT      | MAP kinase-activated protein kinase 2                   | 1,286948548 | 0,375822446 |    |
| 98  | PRRSSIRNA      | Neutrophil cytosol factor 1, p47-PHOX                   | 0,816493675 | 0,180963701 |    |
| 99  | ILDTTGQEE      | K-Ras                                                   | 1,482698917 | 0,166845709 | On |
| 100 | NDSNYIVKG      | Macrophage colony stimulating factor I receptor         | 1,043188943 | 0,110748355 |    |
| 101 | EFLRTSAGS      | 5'-AMP-activated protein kinase                         | 0,596135875 | 0,128960404 |    |
| 102 | ERTNSLPPV      | Volt.-dep. L-type calcium channel alpha-1S              | 0,817146388 | 0,192915141 |    |
| 103 | IRRASTIEM      | Cardiac phospholamban                                   | 0,856665007 | 0,232111313 |    |
| 104 | NFDDYMKSL      | Fatty acid-binding protein                              | 1,012849321 | 0,218280391 |    |
| 105 | PYKFPSSPLRIPGZ |                                                         | 0,799751522 | 0,142541544 |    |
| 106 | GRTGRRNSI      |                                                         | 3,857713972 | 1,225695398 | On |
| 107 | ATPIYLDIL      | TrkC tyrosine kinase                                    | 1,053954936 | 0,141090092 |    |
| 108 | DMRQTVAVG      | elongation factor 1-alpha 1                             | 0,612091687 | 0,020906451 |    |
| 109 | GDRFTDEEV      | Myosin regulatory light chain 2                         | 1,588460199 | 0,491193686 |    |
| 110 | GSGSSVTSR      | Desmin                                                  | 1,023112488 | 0,177478421 |    |
| 111 | EEPQYEEIP      | Middle T antigen                                        | 2,317244044 | 0,898712952 |    |

|     |                |                                                         |             |             |    |
|-----|----------------|---------------------------------------------------------|-------------|-------------|----|
| 112 | ERRLSLVPD      | cystic fibrosis transmembrane conductance regulator     | 1,021285005 | 0,140064803 |    |
| 113 | RRSSSRPIR      | Protamine YI                                            | 3,585354158 | 1,136390017 | On |
| 114 | SKIGSTENL      | Microtubule-associated protein tau                      | 0,671884096 | 0,131400559 |    |
| 115 | NDMTSL         | Tropomyosin 1 alpha                                     | 0,697506351 | 0,092582923 |    |
| 116 | AARLSLTDP      | platelet glycoprotein IB                                | 0,825422974 | 0,09455938  |    |
| 117 | ARRSTTDAG      | Choriogonadotropin beta                                 | 0,812371775 | 0,101586965 |    |
| 118 | DLKDTKYKL      | myosin II heavy chain                                   | 0,837439712 | 0,072232794 |    |
| 119 | GAFSTVKGV      | rhodopsin kinase                                        | 1,327863    | 0,153486785 |    |
| 120 | RGRASSHSS      | Lamin A/C                                               | 1,385099606 | 0,09493176  | On |
| 121 | RKRSRAEF       | Histone H2B                                             | 1,103067546 | 0,095419374 |    |
| 122 | LRAASLG        | Red cell/liver pyruvate kinase                          | 1,119163559 | 0,130288113 |    |
| 123 | RRRQSVLNL      | cystic fibrosis transmembrane conductance regulator     | 1,845048135 | 0,565255012 |    |
| 124 | SIDEYFSEQ      | Interferon receptor                                     | 1,233104025 | 0,327863605 |    |
| 125 | EESESD         | synaptic vesicle amine transporter                      | 1,287722823 | 0,090305711 | On |
| 126 | RRRS           | Troponin I                                              | 3,230753404 | 1,645193534 |    |
| 127 | TAYGTRRHL      | calponin alpha and beta                                 | 2,511637459 | 0,914318863 |    |
| 128 | TRRISQTSQ      | ryanodine receptor                                      | 1,329207638 | 0,299937895 |    |
| 129 | VTPRTPPPS      | Myelin basic protein                                    | 0,678693171 | 0,085039885 |    |
| 130 | REVSSLKSK      | myosin heavy chain                                      | 1,311671491 | 0,16315518  |    |
| 131 | PEETQTQD       | HSP90-alpha                                             | 0,96586055  | 0,072714338 |    |
| 132 | KKQISVR        | Glycogen phosphorylase                                  | 2,427928337 | 0,253012309 | On |
| 133 | WLTKSPDGN      | caldesmon                                               | 0,993289085 | 0,299001028 |    |
| 134 | SRRSSLGSL      | Volt.-dep. L-type calcium channel alpha-1S              | 1,885861851 | 0,266964872 | On |
| 135 | PETVYEVAG      | Cortactin                                               | 1,979563241 | 0,788291373 |    |
| 136 | QEPGSGPPE      | somatostatin receptor type 3                            | 0,589440888 | 0,139373661 |    |
| 137 | SVSSSPIKE      | transcriptional factor SWI5                             | 0,829679395 | 0,217414479 |    |
| 138 | TRLHSLRER      | Sucrose synthase 1                                      | 1,760809372 | 0,322923653 | On |
| 139 | PKEVYDVML      | TrkC tyrosine kinase                                    | 1,02928957  | 0,094062347 |    |
| 140 | PRTPGGRR       | Myelin basic protein                                    | 3,11296056  | 1,119652805 |    |
| 141 | KLSPSPSSR      | Lamin B1                                                | 1,577897023 | 0,171494111 | On |
| 142 | LEKKYVRRD      | macrophage colony stimulating factor 1 receptor         | 1,68828494  | 0,205397464 | On |
| 143 | QASSTPLSP      | Lamin A/C                                               | 0,74815465  | 0,235023261 |    |
| 144 | SRRDSLFP       | Sodium channel protein type II alpha                    | 1,064758108 | 0,044324384 |    |
| 145 | KQPIYVME       | Tyrosine-protein kinase transforming protein Fps        | 1,06388726  | 0,15422761  |    |
| 146 | LLQDSVDFS      | vimentin                                                | 1,266815255 | 0,160272913 |    |
| 147 | QLSTSEENS      | Alpha-S2 casein                                         | 0,874827607 | 0,154440414 |    |
| 148 | KIQASFRGH      | neurogranin                                             | 3,422225418 | 0,206697695 | On |
| 149 | NKGASQAGM      | calponin alpha and beta                                 | 1,080199333 | 0,127163142 |    |
| 150 | EIVESLSSS      | Beta casein                                             | 0,784644987 | 0,117328519 |    |
| 151 | ESSNYMAPY      | platelet-derived growth factor receptor                 | 0,860719504 | 0,186531706 |    |
| 152 | KRPSKRAKA      | Myelin basic protein                                    | 1,99561532  | 0,587598882 |    |
| 153 | NRAITARRQ      | Troponin I                                              | 1,93239398  | 0,281081424 | On |
| 154 | PYKFPSSPLRIPGZ |                                                         | 0,736799122 | 0,308309251 |    |
| 155 | GSRPSESNG      | Lens fiber major intrinsic protein                      | 1,075838396 | 0,086172922 |    |
| 156 | DAHKSKRQH      | transcription factor BAF1                               | 1,130973423 | 0,1491495   |    |
| 157 | DSLIIYDDGL     | Probable receptor with tyrosine-protein kinase activity | 1,98255973  | 0,596485257 |    |
| 158 | GGRDSRSGS      | Myelin basic protein                                    | 0,996788625 | 0,181795384 |    |
| 159 | GVERSVRPT      | phosphorylase b kinase alpha                            | 0,983427756 | 0,147016094 |    |
| 160 | EGVKSDQAE      | neurofilament triplet M                                 | 0,938748875 | 0,391377866 |    |
| 161 | ESLSSSEES      | Beta casein                                             | 1,064321174 | 0,519455915 |    |
| 162 | RVRMSADAM      | Troponin I                                              | 0,846915563 | 0,13703448  |    |
| 163 | SNPTYSVMR      | Middle T antigen                                        | 1,416583905 | 0,215700277 |    |
| 164 | SSKRAK         | Myosin regulatory light chain 2                         | 1,859739769 | 0,418678397 |    |
| 165 | AGDGSDEEV      | myosin heavy chain                                      | 1,172481085 | 0,229555724 |    |
| 166 | AVDRYIAIT      | Beta-2 adrenergic receptor                              | 0,990444452 | 0,213501024 |    |
| 167 | DPLLTFRFP      | Lamin A/C                                               | 0,852482348 | 0,217100065 |    |

|     |                |                                                  |             |             |    |
|-----|----------------|--------------------------------------------------|-------------|-------------|----|
| 168 | GENIYIRHS      | erythrocyte protein 4.1                          | 1,08113846  | 0,153719317 |    |
| 169 | RLSPSPTSQ      | Lamin C                                          | 0,898515947 | 0,079445697 |    |
| 170 | RKESYSV        | Histone H2B                                      | 1,460155234 | 0,894455047 |    |
| 171 | PLSRTL         | Glycogen [starch] synthase                       | 0,848235485 | 0,15711067  |    |
| 172 | RSRASTPPA      | cAMP-dependent protein kinase II (PKA)           | 1,043613345 | 0,026811915 |    |
| 173 | SLSSSEESI      | Beta casein                                      | 1,507229594 | 0,19467504  | On |
| 174 | LRRASLAG       | Red cell/liver pyruvate kinase                   | 1,944881764 | 0,384287438 | On |
| 175 | ADSESEDEE      | cAMP-dependent protein kinase II (PKA)           | 1,915536353 | 0,164880045 | On |
| 176 | THERSPSPS      | phosphorylcholine transferase                    | 0,834758358 | 0,075877668 |    |
| 177 | TVTRSYSRV      | Lamin A/C                                        | 2,570222103 | 0,333502417 | On |
| 178 | YETDYRKG       | Insulin Receptor (IR)                            | 1,550382408 | 0,170762342 | On |
| 179 | RKQISVRGL      | Glycogen phosphorylase                           | 2,058641631 | 0,147522863 | On |
| 180 | AGTTYAL        | myosin heavy chain IA (fragment)                 | 0,995709353 | 0,170648233 |    |
| 181 | LRRASVA        | pyruvate kinase                                  | 1,620301274 | 0,371796581 |    |
| 182 | YRGYSLGNW      | Lysozyme C                                       | 0,933214694 | 0,26326606  |    |
| 183 | SSLKSRKRA      | spermatid nuclear transition protein 1           | 3,186160846 | 1,01888655  | On |
| 184 | PMRRSVSEA      | hormone sensitive lipase                         | 1,255102103 | 0,453984497 |    |
| 185 | RSKRSGSV       | phosphorylase b kinase beta                      | 3,391033914 | 0,590280729 | On |
| 186 | TEGQYQQQP      | Proto-oncogene tyrosine-protein kinase Lck       | 1,116718735 | 0,12136012  |    |
| 187 | TTPLSPTRL      | Lamin B2                                         | 1,380387259 | 0,089151268 | On |
| 188 | PQPEYVNQP      | Receptor tyrosine-protein kinase erbB-2          | 0,990667279 | 0,083082779 |    |
| 189 | VKRGISGL       | Histone H4                                       | 1,672576633 | 0,252092619 | On |
| 190 | KRKQISVRG      | Glycogen phosphorylase                           | 3,627338522 | 1,183245656 | On |
| 191 | LPVPSTHIG      | cGMP-dependent protein kinase (PKG)              | 1,042227099 | 0,185273464 |    |
| 192 | QRRHSLEPP      | Tyrosine-protein kinase transforming protein SRC | 1,133850464 | 0,136929957 |    |
| 193 | SRTLVSSSL      | Glycogen [starch] synthase                       | 1,112134781 | 0,080957254 |    |
| 194 | KRPSERA        | Myelin basic protein                             | 2,616028569 | 0,094245252 | On |
| 195 | LRGRSFMNN      | 6-phosphofructokinase                            | 1,443514136 | 0,189678518 | On |
| 196 | QRVSSYRRT      | Desmin                                           | 3,468877866 | 0,688679368 | On |
| 197 | HDLSEMFFN      | Prolactin                                        | 0,628610036 | 0,066078198 |    |
| 198 | KRPSRRAKA      | Myelin basic protein                             | 2,501738135 | 0,768886961 |    |
| 199 | EDNEYTARP      | Proto-oncogene tyrosine-protein kinase Src       | 2,597573589 | 1,680948268 |    |
| 200 | ENAPSSTSS      | DNA topoisomerase II                             | 0,664621956 | 0,090239526 |    |
| 201 | HMRSSMSGL      | acetyl-CoA carboxylase                           | 0,720108966 | 0,149126869 |    |
| 202 | LDRSSHAQR      | Insulin Receptor (IR)                            | 0,624133103 | 0,124919836 |    |
| 203 | PYKFPSSPLRIPGZ |                                                  | 0,677469379 | 0,224106596 |    |
| 204 | GKEIYNTIR      | Ras p21 activator protein                        | 0,744650636 | 0,121624913 |    |
| 205 | APATPGGRR      | Myelin basic protein                             | 1,971326236 | 0,193665104 | On |
| 206 | DEEESEEA       | elongation factor 1-beta                         | 1,02350798  | 0,202127184 |    |
| 207 | FFKKSIST       | glutamate receptor 6                             | 2,67060575  | 0,123673228 | On |
| 208 | GMGTSVERA      | pyruvate dehydrogenase E1                        | 0,681964027 | 0,102626392 |    |
| 209 | DYDSSDIED      | cactus                                           | 2,536605852 | 0,993466634 |    |
| 210 | EKRASGQAF      | stathmin                                         | 0,701839616 | 0,082624087 |    |
| 211 | RRAVSELDA      | tyrosine 3-monooxygenase                         | 0,484357986 | 0,135848532 |    |
| 212 | SDGGYMDMS      | platelet-derived growth factor receptor          | 0,622141384 | 0,042852013 |    |
| 213 | NWHMTPPRK      | serine/threonine protein phosphatase PP1         | 1,266976391 | 0,248111732 |    |
| 214 | RRASI          | pyruvate kinase                                  | 1,857863919 | 0,347517904 | On |
| 215 | AKKGSEQES      | cAMP-dependent protein kinase (PKA)              | 0,642432323 | 0,097787914 |    |
| 216 | DDEMTGYVA      | Mitogen-activated protein kinase p38             | 0,919469788 | 0,190263115 |    |
| 217 | ETDYRKG        | Insulin Receptor (IR)                            | 0,761066579 | 0,038056661 |    |
| 218 | YVTTSTRTY      | vimentin                                         | 0,963744145 | 0,033109485 |    |
| 219 | SPQPSRRGS      | protein phosphatase 1                            | 2,074848794 | 0,303400235 | On |
| 220 | RRAASVA        | pyruvate kinase                                  | 1,660201567 | 0,066379288 | On |
| 221 | RPSENGQP       | Lens fiber major intrinsic protein               | 0,607282132 | 0,06530224  |    |
| 222 | SASTTPVKK      | Histone H1                                       | 1,002800806 | 0,199852783 |    |
| 223 | NSYGSRRG       | iron-responsive element binding protein          | 2,383694843 | 1,070997075 |    |



|     |                |                                                         |             |             |    |
|-----|----------------|---------------------------------------------------------|-------------|-------------|----|
| 224 | LRRASL         | pyruvate kinase                                         | 1,122830339 | 0,137408063 |    |
| 225 | SSTDSADSG      | Early E1A                                               | 0,575568913 | 0,063047915 |    |
| 226 | TKSGSTTKN      | eukaryotic translation initiation factor 4E             | 1,21604047  | 0,173296896 |    |
| 227 | VETTYADFI      | cAMP-dependent protein kinase inhibitor alpha           | 0,841285255 | 0,263225269 |    |
| 228 | YSFTTTAER      | Actin                                                   | 0,558584413 | 0,081338792 |    |
| 229 | SPFKYQSL       | Beta-2 adrenergic receptor                              | 0,674204799 | 0,092549652 |    |
| 230 | RKRSAAE        | Histone H2B                                             | 0,994527531 | 0,111908046 |    |
| 231 | VIKRSPRKR      | transcriptional factor SWI6                             | 3,405456366 | 1,383249351 |    |
| 232 | SPVKSPEAK      | neurofilament triplet M                                 | 0,713508153 | 0,105410991 |    |
| 233 | LRRASVAQL      | pyruvate kinase                                         | 1,72940604  | 0,366851041 |    |
| 234 | PRMPSLSVP      | Sodium channel protein                                  | 0,628662952 | 0,099757833 |    |
| 235 | SSPVYQDAV      | Cortactin                                               | 0,911143982 | 0,315729138 |    |
| 236 | TKDITYDALH     | T-cell surface glycoprotein CD3 zeta                    | 0,698351777 | 0,07456211  |    |
| 237 | LRSPSWEFP      | Heat Shock Protein 26                                   | 0,756422978 | 0,042971867 |    |
| 238 | PSLPTPPTR      | Microtubule-associated protein tau                      | 1,098186497 | 0,132880839 |    |
| 239 | KASASPRRK      | Histone H3                                              | 2,965446169 | 0,550383459 | On |
| 240 | KRRDYDLA       | Probable receptor with tyrosine-protein kinase activity | 0,733842075 | 0,120542948 |    |
| 241 | PAPAVRASDRA    | Troponin I                                              | 0,624750015 | 0,082387108 |    |
| 242 | QSRASDKQT      | T-cell surface glycoprotein CD3 gamma                   | 0,606981388 | 0,053601259 |    |
| 243 | KGQESFKKQ      | Nucleophosmin                                           | 1,440922504 | 0,064687236 | On |
| 244 | KRSGSVYEP      | phosphorylase b kinase beta                             | 1,245002406 | 0,204996261 |    |
| 245 | KRAQISVRGL     | Glycogen phosphorylase                                  | 2,60267109  | 0,291426391 | On |
| 246 | HSSSQGGG       | Lamin C                                                 | 0,505866304 | 0,013831099 |    |
| 247 | MAEAYSEIG      | T-cell surface glycoprotein CD3 zeta                    | 1,265776672 | 0,517509091 |    |
| 248 | EEESSYSYE      | RNA polymerase alpha                                    | 4,754912153 | 2,043940277 |    |
| 249 | EQPGSDEED      | Ornithine decarboxylase                                 | 1,005176959 | 0,131612792 |    |
| 250 | IEQFSTVKG      | G protein-coupled receptor kinase 5                     | 0,701119963 | 0,248320641 |    |
| 251 | MLDHSESTK      | myelin                                                  | 0,580403026 | 0,20536268  |    |
| 252 | PYKFPSSPLRIPGZ |                                                         | 0,584901822 | 0,111659842 |    |
| 253 | GPRTTAQQ       | cGMP-dependent protein kinase (PKG)                     | 1,695452232 | 0,359851025 |    |
| 254 | AQDTYLVLD      | Erythropoietin Receptor                                 | 0,886171385 | 0,254407072 |    |
| 255 | DIPESQMEE      | Band 3 anion transport protein                          | 0,898895216 | 0,171465379 |    |
| 256 | FPRASFGSR      | Desmin                                                  | 2,210072996 | 0,762523066 |    |
| 257 | GRKASGSSP      | myosin light chain kinase                               | 1,272717378 | 0,089100147 | On |
| 258 | EDVGSDEEE      | HSP90-alpha                                             | 1,305849772 | 0,148482715 |    |
| 259 | EPAVSPLLP      | Tyrosine-protein kinase Dash/Abl                        | 0,880023627 | 0,126409107 |    |
| 260 | RRRASQLKI      | Gamma-aminobutyric-acid receptor beta-2                 | 0,766660809 | 0,215411762 |    |
| 261 | SFTTTAERE      | Actin                                                   | 0,447376814 | 0,096017841 |    |
| 262 | PLSRTL         | glycogen synthase                                       | 0,676612584 | 0,110525504 |    |
| 263 | SGRGK          | Histone H4                                              | 1,447668277 | 0,221944833 |    |
| 264 | APRSPGGRR      | Myelin basic protein                                    | 2,698057392 | 0,356615413 | On |
| 265 | DGERYDEDE      | Glycogen [starch] synthase                              | 1,739323815 | 0,646224167 |    |
| 266 | FKRPTLRRV      | troponin I                                              | 3,110107816 | 0,570384129 | On |
| 267 | REAEYEPET      | Cortactin                                               | 1,444033017 | 0,520575533 |    |
| 268 | DRVYIHPF       | Angiotensinogen                                         | 0,76535359  | 0,060033936 |    |
| 269 | VRRISGL        | Histone H4                                              | 1,409887338 | 0,209155827 |    |
| 270 | RRKGTDVNV      | Annexin I                                               | 1,3913967   | 0,256365341 |    |
| 271 | SETKTEEEE      | DNA topoisomerase II                                    | 0,766991058 | 0,159968871 |    |
| 272 | PQRATSNVF      | Myosin regulatory light chain 2                         | 0,97385446  | 0,147736527 |    |
| 273 | RRGSV          | pyruvate kinase or palladin                             | 2,660254758 | 0,422460906 | On |
| 274 | STSKSESSQ      | 40S ribosomal protein S6                                | 0,736574948 | 0,095053961 |    |
| 275 | TRAPSRTAS      | ATP-citrate (pro-S-) lyase                              | 1,390448574 | 0,350758052 |    |
| 276 | VPRTPGGRR      | Myelin basic protein                                    | 3,356329779 | 1,069452768 | On |
| 277 | RASSRSVR       | Lamin B0                                                | 3,780903388 | 1,665373165 |    |
| 278 | SPSSPASL       | phosphorylcholine transferase                           | 0,68712486  | 0,125818599 |    |
| 279 | RVYVHPF        |                                                         | 1,634968155 | 0,411775418 |    |

|     |                |                                                     |             |             |    |
|-----|----------------|-----------------------------------------------------|-------------|-------------|----|
| 280 | VRRVSDDDR      | Tyrosine 3-monooxygenase                            | 0,831518999 | 0,044101658 |    |
| 281 | SRKMSIQEY      | phosducin                                           | 0,984967168 | 0,102874987 |    |
| 282 | LSGFSEFKKS     | myristolated alanine-rich C-kinase substrate        | 2,178370007 | 0,251937461 | On |
| 283 | PSSTSSSSI      | DNA topoisomerase II                                | 0,816257614 | 0,29390257  |    |
| 284 | STGIYEALE      | Alpha enolase                                       | 2,163332696 | 0,890636908 |    |
| 285 | TPPKSPSAS      | Microtubule-associated protein tau                  | 0,820713098 | 0,090455554 |    |
| 286 | LYSSSPGGA      | vimentin                                            | 0,678901658 | 0,060353837 |    |
| 287 | PVPKSPVEE      | neurofilament triplet M                             | 0,730470961 | 0,033802868 |    |
| 288 | KKASFKAKK      |                                                     | 4,375960643 | 0,721830483 | On |
| 289 | KSPAKTPVK      | Actin and myosin binding protein                    | 2,086754882 | 0,142365331 | On |
| 290 | PLSKTLSVSS     | Glycogen [starch] synthase                          | 0,75638849  | 0,137240975 |    |
| 291 | SRGKSSSYS      | Fibrinogen alpha                                    | 1,463662593 | 0,496704056 |    |
| 292 | KKLGSKKPQ      | Sodium channel protein type II alpha                | 2,736810205 | 0,413362258 | On |
| 293 | KTASTRKY       | cystic fibrosis transmembrane conductance regulator | 3,727523715 | 0,249254834 | On |
| 294 | PRRTRRAS       | Protamine YII                                       | 0,98865345  | 0,209767805 |    |
| 295 | IHQRSRRL       | Neutrophil cytosol factor 2                         | 1,876960252 | 0,216372125 | On |
| 296 | NDALSGSGN      | galectin-3                                          | 0,751330865 | 0,138359499 |    |
| 297 | EETQTQDQP      | HSP90-alpha                                         | 0,627398405 | 0,11281471  |    |
| 298 | ERSQSRKDS      | alpha-1B adrenergic receptor                        | 0,685617751 | 0,153636129 |    |
| 299 | IRQASQAGP      | synapsins                                           | 0,587356623 | 0,075914897 |    |
| 300 | NFDDYMKEV      | Fatty acid-binding protein                          | 0,949763503 | 0,075988775 |    |
| 301 | PYKFPSSPLRIPGZ |                                                     | 1,107523358 | 0,558941668 |    |
| 302 | GRRQSLIQD      | tyrosine 3-monooxygenase                            | 1,007633434 | 0,175299448 |    |
| 303 | ASFEYTILD      | Erythropoietin Receptor                             | 1,3830046   | 0,283780409 |    |
| 304 | DLSTYASIN      | Insulin receptor substrate 2                        | 0,929837986 | 0,360457535 |    |
| 305 | GDNDYIPL       | platelet-derived growth factor receptor             | 1,432474037 | 0,190995594 |    |
| 306 | GSESTEDQA      | Alpha-S1 casein                                     | 0,641695034 | 0,121886275 |    |
| 307 | EENVSVDDT      | eukaryotic translation initiation factor 4E         | 0,818472989 | 0,038826378 |    |
| 308 | ERRKSKSGA      | cAMP-regulated phosphoprotein 21                    | 1,09669988  | 0,186893755 |    |
| 309 | RRRSRSRS       | Lamin B receptor                                    | 4,228078017 | 0,582871366 | On |
| 310 | SKIGSLDNI      | Microtubule-associated protein tau                  | 0,8706433   | 0,09881463  |    |
| 311 | NDITSL         | Tropomyosin beta                                    | 0,919928472 | 0,243495398 |    |
| 312 | AARGSFIDAS     | rhodopsin kinase                                    | 0,745094137 | 0,215255279 |    |
| 313 | ARNDSVTVA      | cAMP response element-binding protein CRE-BP1       | 0,611268218 | 0,085142801 |    |
| 314 | DLFGSDEED      | elongation factor 1-beta                            | 1,308555036 | 0,297771029 |    |
| 315 | FSSRSYTSG      | Keratin 8                                           | 1,265269463 | 0,097997556 | On |
| 316 | RGKSSYSK       | Fibrinogen alpha                                    | 2,365008451 | 0,379397238 | On |
| 317 | RKRSRAEA       | Histone H2B                                         | 1,343736773 | 0,071885646 | On |
| 318 | LKRASLG        | pyruvate kinase                                     | 0,864020865 | 0,115223006 |    |
| 319 | RRRPTPATL      | Protein phosphatase inhibitor 1                     | 1,838899097 | 0,644654811 |    |
| 320 | SIADTFVGT      | Serine/threonine-protein kinase STE7                | 0,874051184 | 0,046770597 |    |
| 321 | LRRNSI         | cystic fibrosis transmembrane conductance regulator | 1,122753541 | 0,249545056 |    |
| 322 | RRRRASVA       | pyruvate kinase                                     | 4,081641321 | 2,083861116 |    |
| 323 | TATDYHTTS      | Band 3 anion transport protein                      | 0,939254418 | 0,08616821  |    |
| 324 | TRRASRPVR      | Protamine YII                                       | 2,912680476 | 0,21244391  | On |
| 325 | VSSSYRRM       | vimentin                                            | 2,731759753 | 0,661959281 | On |
| 326 | REVSSLKKNK     | myosin heavy chain                                  | 1,256043517 | 0,187522212 |    |
| 327 | LSYRRYSL       |                                                     | 1,981853684 | 0,076350643 | On |
| 328 | KKKASVA        | pyruvate kinase                                     | 1,404138822 | 0,092467126 | On |
| 329 | WKRTSMKLL      | dihydropyridine-sensitive calcium channel           | 2,028051309 | 0,880077168 |    |
| 330 | SRRQSVLVK      | glutamate receptor 6                                | 2,322189793 | 0,291312799 | On |
| 331 | PENDYEDVE      | Hematopoietic cell-specific LYN substrate           | 4,47382437  | 2,323339231 |    |
| 332 | QEGLYNELQ      | T-cell surface glycoprotein CD3 zeta                | 1,215615886 | 0,238836532 |    |
| 333 | SVPPSPSLS      | Glycogen [starch] synthase                          | 0,611320444 | 0,025166474 |    |
| 334 | TRKVSLAPQ      | cystic fibrosis transmembrane conductance regulator | 0,969748594 | 0,103305799 |    |
| 335 | PKDPSQRRR      | Proto-oncogene tyrosine-protein kinase Src          | 1,706124849 | 0,148438049 | On |

|     |                |                                                           |             |             |    |
|-----|----------------|-----------------------------------------------------------|-------------|-------------|----|
| 336 | KRKQISVR       | Glycogen phosphorylase                                    | 3,992894112 | 1,465899838 | On |
| 337 | KLRRSSSVG      | Acetylcholine receptor protein delta                      | 3,424376917 | 0,914780016 | On |
| 338 | LDPLSEPED      | Thyroid hormone receptor alpha                            | 1,510095953 | 0,351191012 |    |
| 339 | QAGMTAPGT      | calponin alpha and beta                                   | 0,701511534 | 0,066989165 |    |
| 340 | SRRASRPVR      | Protamine Z                                               | 1,991516404 | 0,410003322 | On |
| 341 | KPGFSPQPS      |                                                           | 0,90062899  | 0,132529361 |    |
| 342 | LLPMSPEEF      | Signal Transducer and Activator of Transcription 1        | 1,050257513 | 0,288100784 |    |
| 343 | QLNDSSEEE      | E7 protein                                                | 1,334932354 | 0,234036533 |    |
| 344 | KGGSYSQAA      | HLA class I histocompatibility antigen B7                 | 1,313106432 | 0,113718492 | On |
| 345 | NIYISPLKS      | Retinoblastoma-associated protein                         | 1,577354541 | 0,169984266 | On |
| 346 | EIRVSINEK      | cGMP-dependent protein kinase (PKG)                       | 1,238359385 | 0,408867164 |    |
| 347 | ESRISLPLP      | vimentin                                                  | 0,976045499 | 0,048271451 |    |
| 348 | KRPSIRAKA      | Myelin basic protein                                      | 3,936247837 | 1,502093005 |    |
| 349 | NPGFYVEAN      | 1-phosphatidylinositol-4,5-bisphosphate phosphodiesterase | 1,493755346 | 0,122657942 | On |
| 350 | PYKFPSSPLRIPGZ |                                                           | 0,790357101 | 0,181172728 |    |
| 351 | GSRGSQSSV      | Desmin                                                    | 1,30975846  | 0,209760856 |    |
| 352 | DAGASPVEK      | myristolated alanine-rich C-kinase substrate (MARCKS)     | 0,815932875 | 0,210412786 |    |
| 353 | DRRVSAAE       | cAMP-dependent protein kinase II (PKA)                    | 0,827535587 | 0,109198363 |    |
| 354 | GGRASDYKS      | Myelin basic protein                                      | 1,085323064 | 0,171479761 |    |
| 355 | GVDTYVEMR      | Macrophage colony stimulating factor I receptor           | 1,2437348   | 0,087790853 | On |
| 356 | EGTHSTKRG      | Fibrinogen alpha                                          | 1,141689596 | 0,067588694 |    |
| 357 | ESLESYEIN      | Matrix Gla-protein                                        | 1,23961387  | 0,21594884  |    |
| 358 | RVRKTKGKY      | glutamate receptor 1                                      | 4,101549649 | 0,484137721 | On |
| 359 | SNPEYLSAS      | Insulin Receptor (IR)                                     | 1,058549749 | 0,082875616 |    |
| 360 | RRSTVA         | Protamines Z1 and Z2                                      | 1,786798436 | 0,48236985  |    |
| 361 | AEPGSPTAA      | myristolated alanine-rich C-kinase substrate (MARCKS)     | 0,578079603 | 0,03808584  |    |
| 362 | AVDGYVKPQ      | Signal Transducer and Activator of Transcription 5        | 0,963854823 | 0,100077596 |    |
| 363 | DPGVSYRTR      | pyruvate dehydrogenase E1                                 | 1,469700409 | 0,050578346 | On |
| 364 | GEINTEDDD      | calsequestrin                                             | 1,335003604 | 0,381311646 |    |
| 365 | RLSISTESQ      | phosphorylase b kinase alpha                              | 0,984492927 | 0,179975201 |    |
| 366 | RKEISVR        | Glycogen phosphorylase                                    | 1,846945794 | 0,054402663 | On |
| 367 | PGSPQKR        | Histone H2                                                | 0,844112834 | 0,047279356 |    |
| 368 | RSGYSSPGS      | Microtubule-associated protein tau                        | 0,927518746 | 0,109135062 |    |
| 369 | SLRASTSKS      | 40S ribosomal protein S6                                  | 2,136922636 | 0,09792186  | On |
| 370 | VRKISGL        | Histone H4                                                | 1,789163963 | 0,65456234  |    |
| 371 | ADGVYAASG      | Tyrosine-protein kinase transforming protein Fes          | 1,209563628 | 0,181037798 |    |
| 372 | TGFLTEYVA      | myelin                                                    | 1,192759818 | 0,247344587 |    |
| 373 | TVSTSLGHS      | muscarinic acetylcholine receptor M2                      | 0,749595391 | 0,123377679 |    |
| 374 | YDKEYYSVH      | Receptor tyrosine kinase for hepatocyte growth factor     | 1,411685198 | 0,115966468 | On |
| 375 | RKLSQGTR       | spermatid nuclear transition protein 2                    | 1,737772042 | 0,279647346 | On |
| 376 | NRKPSKDKD      | Gamma-aminobutyric-acid receptor gamma                    | 1,715070452 | 0,34486634  |    |
| 377 | LRRASPG        | pyruvate kinase                                           | 1,10978458  | 0,212775447 |    |
| 378 | YMAPYDNYV      | platelet-derived growth factor receptor                   | 1,449570988 | 0,242799364 |    |
| 379 | SSKAYGNGY      | Beta-2 adrenergic receptor                                | 1,091341355 | 0,145825557 |    |
| 380 | PLTPSGEAP      | EGF Receptor                                              | 0,900848978 | 0,207789928 |    |
| 381 | RRRRPTPA       | pyruvate kinase                                           | 5,686711422 | 1,986693851 | On |
| 382 | TEGQYQPQP      | Proto-oncogene tyrosine-protein kinase Lck                | 0,950318806 | 0,154835543 |    |
| 383 | TSSSIFDI       | DNA topoisomerase II                                      | 1,090860172 | 0,07915129  |    |
| 384 | PPSPSLSRH      | Glycogen [starch] synthase                                | 2,561744648 | 0,572591831 | On |
| 385 | SSKRAKAK       | Myosin regulatory light chain 2                           | 3,225521512 | 0,703423877 | On |
| 386 | KRKNSILNP      | cystic fibrosis transmembrane conductance regulator       | 2,121697649 | 0,251681758 | On |
| 387 | LNRMSFASN      | acetyl-CoA carboxylase                                    | 1,091378776 | 0,114941082 |    |
| 388 | QRHGSKYLA      | Myelin basic protein                                      | 0,914902105 | 0,134032975 |    |
| 389 | SRTASFSES      | ATP-citrate (pro-S-) lyase                                | 0,954880695 | 0,342109738 |    |
| 390 | KRPSDRAKA      | Myelin basic protein                                      | 3,53490726  | 0,880408506 | On |
| 391 | LRGPSWDPF      | Heat Shock Protein 27                                     | 1,118973211 | 0,259583483 |    |

|     |                |                                                           |             |             |    |
|-----|----------------|-----------------------------------------------------------|-------------|-------------|----|
| 392 | QRSTSTPNV      | RAF proto-oncogene ser/thr-protein kinase                 | 0,844070386 | 0,398313434 |    |
| 393 | HDALSGSGN      | galectin-3                                                | 0,65295159  | 0,111196106 |    |
| 394 | KRPSQRAKY      | Myelin basic protein                                      | 2,256544043 | 1,188719159 |    |
| 395 | EDNEYTARE      | Tyrosine-protein kinase Hck                               | 1,562735568 | 1,187340401 |    |
| 396 | ENAFSPSRS      | caldesmon                                                 | 0,646374578 | 0,076710628 |    |
| 397 | HKSGYLSSE      | Connection of cytoskeletal structure to plasma membrane   | 0,594723816 | 0,10477657  |    |
| 398 | LAYESHESM      | Matrix Gla-protein                                        | 0,695089905 | 0,066462936 |    |
| 399 | PYKFPSSPLRIPGZ |                                                           | 0,757007209 | 0,036460957 |    |
| 400 | GHQGTVPSPD     | Beta-2 adrenergic receptor                                | 0,537317219 | 0,143200979 |    |
| 401 | ANDEYFIRK      | Acetylcholine receptor protein beta                       | 0,637114667 | 0,041247243 |    |
| 402 | DEASTTVSK      | Rhodopsin                                                 | 0,660764794 | 0,126104588 |    |
| 403 | FEARYQQPF      | 1-phosphatidylinositol-4,5-bisphosphate phosphodiesterase | 0,826765452 | 0,116553629 |    |
| 404 | GLLRSWNDP      | Prolactin                                                 | 0,827506652 | 0,077285131 |    |
| 405 | DTVTSQARA      | Proto-oncogene tyrosine-protein kinase Src                | 2,294064355 | 1,69431767  |    |
| 406 | EKHHSIDAQ      | Phosphoenolpyruvate carboxylase 1                         | 0,713550084 | 0,143174873 |    |
| 407 | RRASTIEMP      | Cardiac phospholamban                                     | 0,753967981 | 0,050876299 |    |
| 408 | SDEESNDDS      | calsequestrin                                             | 0,811580266 | 0,191239098 |    |
| 409 | NVFSSPGGT      | Actin and myosin binding protein                          | 0,67361541  | 0,055269795 |    |
| 410 | RRASF          | pyruvate kinase                                           | 1,921585113 | 0,838976618 |    |
| 411 | AKGGTVKAA      | annexin IV                                                | 0,954970078 | 0,196553634 |    |
| 412 | DDEITQDEN      | muscarinic acetylcholine receptor M2                      | 0,798256021 | 0,227830022 |    |
| 413 | ETDDYAEII      | Focal adhesion kinase                                     | 1,215405789 | 0,444208781 |    |
| 414 | YTTNSPSKI      | transcriptional factor SWI7                               | 0,51596485  | 0,168440713 |    |
| 415 | SPLKSPYKI      | Retinoblastoma-associated protein                         | 0,89291812  | 0,225989682 |    |
| 416 | RKRRTRKE       | Histone H2B                                               | 1,928551134 | 1,021379888 |    |
| 417 | RPPGFTPFR      |                                                           | 1,360217139 | 0,289589237 |    |
| 418 | SASGTPNKE      | caldesmon                                                 | 0,712937502 | 0,156861532 |    |
| 419 | NSVDTSSLS      | Glycogen [starch] synthase                                | 0,786532488 | 0,107953799 |    |
| 420 | LRANSI         | cystic fibrosis transmembrane conductance regulator       | 0,829181539 | 0,155156667 |    |
| 421 | SSSSPSRR       | Lamin B receptor                                          | 1,995520322 | 0,763865348 |    |
| 422 | TKSASFLKG      | nodulin-26                                                | 0,954575687 | 0,329329621 |    |
| 423 | VESLSSSEE      | Beta casein                                               | 1,168078016 | 0,195419321 |    |
| 424 | YRRNSVRFL      | Neutrophil cytosol factor 3                               | 2,505252958 | 0,728146168 |    |
| 425 | SPALTGDEA      | Insulin receptor substrate 4                              | 0,874318351 | 0,151347814 |    |
| 426 | RKQITVR        | Glycogen phosphorylase                                    | 2,700241983 | 0,712844227 | On |
| 427 | VHNRSKINL      | HMG-CoA reductase                                         | 1,198477186 | 0,414010975 |    |
| 428 | SPVHSIADE      | fructose-1,6-bisphosphatase                               | 0,642939136 | 0,059473307 |    |
| 429 | LRRASLGAF      | pyruvate kinase                                           | 1,956235432 | 0,576759358 |    |
| 430 | PRKGSPRKG      | Histone H2B.2                                             | 1,418104074 | 0,528906059 |    |
| 431 | SSPGSPGTP      | Microtubule-associated protein tau                        | 0,837721497 | 0,212855641 |    |
| 432 | TKAASEKKT      | myelin                                                    | 0,946473993 | 0,403780402 |    |
| 433 | LRRSSSVGY      | Acetylcholine receptor protein delta                      | 3,887565921 | 1,831708466 |    |
| 434 | PSEKSEEIT      | astrocytic phosphoprotein PEA-15                          | 1,020928171 | 0,186247851 |    |
| 435 | KAQEYFNIK      | Acetylcholine receptor protein delta                      | 0,838417562 | 0,187218823 |    |
| 436 | KRQSSTSNA      | phosphorylase b kinase beta                               | 1,384992343 | 0,280098768 |    |
| 437 | QKRPSQRSKYL    | Myelin basic protein                                      | 2,590719046 | 0,751144861 | On |
| 438 | QSPSSSPTH      | phosphorylcholine transferase                             | 0,890695875 | 0,254928598 |    |
| 439 | KGHEYTNIK      | Protein-tyrosine phosphatase 2                            | 1,127542124 | 0,480778514 |    |
| 440 | KRRSSSYHV      | Sodium channel protein type II alpha                      | 5,116436649 | 1,143126919 | On |
| 441 | KAKQISVRGL     | Glycogen phosphorylase                                    | 2,594493806 | 0,514880303 | On |
| 442 | HSIYSSDDD      | Myb proto-oncogene protein                                | 0,889708374 | 0,304568919 |    |
| 443 | LVMQTAAGT      | myosin light chain kinase                                 | 1,001296929 | 0,350064044 |    |
| 444 | EEELYLEPL      | Tyrosine-protein kinase receptor                          | 1,989708145 | 0,746285984 |    |
| 445 | EQLSTSEEN      | Alpha-S2 casein                                           | 0,664365591 | 0,126062673 |    |
| 446 | IDMESQERI      | Transcription factor AP-1                                 | 0,745620155 | 0,056383223 |    |
| 447 | MILLSELSR      | eukaryotic translation initiation factor 4F               | 0,743838314 | 0,095187841 |    |

|     |                |                                                       |             |             |    |
|-----|----------------|-------------------------------------------------------|-------------|-------------|----|
| 448 | PYKFPSSPLRIPGZ |                                                       | 0,663329039 | 0,0554268   |    |
| 449 | GPAASAAA       | myristolated alanine-rich C-kinase substrate (MARCKS) | 0,43443435  | 0,075058528 |    |
| 450 | AQAASPAKG      | Protein tyrosine phosphatase 1B                       | 0,652453085 | 0,104734609 |    |
| 451 | DHSRSTKAA      | myelin                                                | 1,01141407  | 0,107035542 |    |
| 452 | FPFHSPSRL      | Alpha crystallin B                                    | 1,428070111 | 0,262502101 |    |
| 453 | GRILTLPRS      | Insulin Receptor (IR)                                 | 1,241888712 | 0,187499256 |    |
| 454 | EDVGSDEED      | Heat Shock Protein 90-beta                            | 1,116631264 | 0,221743167 |    |
| 455 | ENTVSTSLG      | muscarinic acetylcholine receptor M2                  | 0,613965422 | 0,061557443 |    |
| 456 | RRQHSYDTF      | glutamate (NMDA) receptor epsilon                     | 0,709370386 | 0,110303725 |    |
| 457 | SFMMTPYVV      | Stress-activated protein kinase JNK1                  | 0,747101233 | 0,010375373 |    |
| 458 | PGTESFVNA      | Beta-2 adrenergic receptor                            | 0,65182061  | 0,01727787  |    |
| 459 | SDEEV          | Troponin T                                            | 0,952009911 | 0,140644207 |    |
| 460 | APQTPGGRR      | Myelin basic protein                                  | 1,741009029 | 0,285876444 | On |
| 461 | DFPLSPPKK      | stathmin                                              | 1,018590621 | 0,14085764  |    |
| 462 | FKAFSPKGS      | Actin and myosin binding protein                      | 1,732353105 | 0,172887463 | On |
| 463 | RDSNYISKG      | platelet-derived growth factor receptor               | 0,81962365  | 0,140746607 |    |
| 464 | DDEESESD       | synaptic vesicle amine transporter                    | 1,71667356  | 0,362420257 |    |
| 465 | VKRISGL        | Histone H4                                            | 1,29242387  | 0,125575414 | On |
| 466 | RRKDYPALH      |                                                       | 1,117728257 | 0,189089294 |    |
| 467 | SEKKSGLG       | myelin                                                | 0,710378011 | 0,079711866 |    |
| 468 | PPSAYGSVK      | Annexin II                                            | 1,082131849 | 0,213063627 |    |
| 469 | RRFSV          | pyruvate kinase                                       | 2,401652495 | 0,662632388 | On |
| 470 | STRRSVGRS      | multidrug resistance protein 1                        | 4,440265401 | 0,514905271 | On |
| 471 | TQSTSGRRR      | cAMP response element-binding protein CRE-BP2         | 4,017553497 | 1,392965545 | On |
| 472 | VNELSKDIG      | Alpha-S1 casein                                       | 0,769689734 | 0,035595966 |    |
| 473 | RAGETRFTD      | elongation factor 3                                   | 0,626188291 | 0,196669531 |    |
| 474 | SPSPSFRWP      | phosphorylcholine transferase                         | 1,037803373 | 0,197273858 |    |
| 475 | RVSGSRR        | Lamin C                                               | 4,578296549 | 1,007169652 | On |
| 476 | VRLRSSVPG      | vimentin                                              | 1,8173167   | 0,740068855 |    |
| 477 | SRKLSDFGQ      | Phenylalanine-4-hydroxylase                           | 0,949409103 | 0,099214929 |    |
| 478 | LSGFSFKKN      | myristolated alanine-rich C-kinase substrate          | 1,949138407 | 0,269980725 | On |
| 479 | PSRRSRSRS      | Lamin B receptor                                      | 0,989469358 | 0,205260035 |    |
| 480 | STDYYREGP      | TrkC tyrosine kinase                                  | 1,910276745 | 0,769918094 |    |
| 481 | TPAISPSKR      | deoxyuridine 5'-triphosphate nucleotidohydrolase      | 1,859080497 | 0,45017634  |    |
| 482 | LVVASAGPT      | RNA polymerase alpha                                  | 0,850057021 | 0,029211461 |    |
| 483 | PVPEYINQS      | EGF Receptor                                          | 1,077582197 | 0,24849398  |    |
| 484 | KKAESPVKE      | neurofilament triplet M                               | 1,153578622 | 0,059319436 | On |
| 485 | KSLNYIDLD      | Insulin receptor substrate 5                          | 1,338189776 | 0,419186742 |    |
| 486 | KRKQISVRGL     | Glycogen phosphorylase                                | 2,624981903 | 0,210887155 | On |
| 487 | SRGDYMTMQ      | Insulin receptor substrate 6                          | 0,784191172 | 0,162171432 |    |
| 488 | KKKSGGEDD      | eukaryotic translation initiation factor 4F           | 1,022341491 | 0,238239979 |    |
| 489 | KTSPSSSPA      | phosphorylcholine transferase                         | 1,050476402 | 0,100153304 |    |
| 490 | PRRRSSFGI      | Acetylcholine receptor protein gamma                  | 1,016186743 | 0,172849945 |    |
| 491 | IGSVSEDNS      | acetyl-CoA carboxylase                                | 1,933440365 | 1,075567783 |    |
| 492 | NAPVSALGE      | Myb proto-oncogene protein                            | 0,700299991 | 0,0274172   |    |
| 493 | EETPYSYPT      | Paxillin                                              | 1,708467094 | 0,607876207 |    |
| 494 | ERSPSPSFR      | phosphorylcholine transferase                         | 1,194064757 | 0,273434798 |    |
| 495 | IRKYTMRRL      | Receptor tyrosine-protein kinase erbB-2               | 2,463898191 | 1,418155414 |    |
| 496 | NEEESYSY       | RNA polymerase alpha                                  | 3,168404596 | 1,756060897 |    |
| 497 | PYKFPSSPLRIPGZ |                                                       | 0,889383451 | 0,23799383  |    |
| 498 | GRRQSLIED      | Tyrosine 3-monooxygenase                              | 0,858600683 | 0,141613368 |    |
| 499 | ASATSSSGG      | Glycogen [starch] synthase                            | 0,662816913 | 0,085398617 |    |
| 500 | DLPMPSPRTL     | Signal Transducer and Activator of Transcription 3    | 0,611075364 | 0,05142747  |    |
| 501 | GDLQSAEFH      | Cystatin                                              | 0,753843126 | 0,094169002 |    |
| 502 | GSEEMYNMD      | Insulin receptor substrate 3                          | 0,847601919 | 0,073716851 |    |
| 503 | EENTYDEYE      | Cortactin                                             | 1,374059757 | 0,268862499 |    |



|     |                |                                                           |             |             |    |
|-----|----------------|-----------------------------------------------------------|-------------|-------------|----|
| 504 | ERRKSHEAE      | stathmin                                                  | 1,046734751 | 0,191803104 |    |
| 505 | RRRVTSATR      | glial fibrillary acidic protein                           | 2,997402817 | 1,787970136 |    |
| 506 | SKDSSKRGR      | myelin                                                    | 2,513751066 | 1,253417892 |    |
| 507 | MSVEEV         | eukaryotic translation initiation factor 4E               | 0,688596067 | 0,152126403 |    |
| 508 | AALESEDED      | eukaryotic translation initiation factor 4F               | 1,296736174 | 0,283461658 |    |
| 509 | ARKSTRRSI      | pleckstrin                                                | 3,27576018  | 1,492352187 |    |
| 510 | DLFGSDDEE      | elongation factor 1-beta                                  | 1,500692309 | 0,462616394 |    |
| 511 | FRRLSISTE      | phosphorylase b kinase alpha                              | 1,009972206 | 0,115490339 |    |
| 512 | RGAISAEVY      | cAMP-dependent protein kinase (PKA)                       | 1,050556795 | 0,226219227 |    |
| 513 | RKISASEF       |                                                           | 0,8811355   | 0,190325696 |    |
| 514 | LHRASLG        | pyruvate kinase                                           | 0,806251155 | 0,173767361 |    |
| 515 | RRRPTPAML      | Dopamine- and cAMP-regulated neuronal phosphoprotein      | 1,619439187 | 0,479792426 |    |
| 516 | SGYSSPGSP      |                                                           | 0,746185745 | 0,16260002  |    |
| 517 | LGEGTP         | Calgranulin B                                             | 0,821081921 | 0,071453624 |    |
| 518 | RRLSSLRA       | 40S ribosomal protein S6                                  | 3,724928698 | 1,393383411 |    |
| 519 | TAESSQAE       | Neuromodulin                                              | 0,923269781 | 0,163885699 |    |
| 520 | TRRASFSAQ      | Regulatory protein ADR1                                   | 1,381058206 | 0,349484241 |    |
| 521 | VSRTSAVPT      | Desmin                                                    | 0,707754867 | 0,160409644 |    |
| 522 | REQLSTSEE      | Alpha-S2 casein                                           | 0,806122033 | 0,117018991 |    |
| 523 | LSYRGYSL       |                                                           | 0,865058751 | 0,221163263 |    |
| 524 | KASGSSP        |                                                           | 0,852382281 | 0,174544855 |    |
| 525 | VVGGSRLGA      | Protein tyrosine phosphatase 1B                           | 1,150756455 | 0,195478388 |    |
| 526 | SRRPSYRKI      | cAMP response element binding protein                     | 2,165896646 | 0,867919196 |    |
| 527 | PEGDYEEVL      | Hematopoietic cell-specific LYN substrate                 | 3,052961097 | 1,759258825 |    |
| 528 | QEGDTDAGL      |                                                           | 0,97819085  | 0,176543076 |    |
| 529 | SVFSSPSAS      | caldesmon                                                 | 0,648999449 | 0,116256996 |    |
| 530 | TRKISQTAQ      | ryanodine receptor                                        | 0,883469024 | 0,167603415 |    |
| 531 | PINGSPRTP      | Retinoblastoma-associated protein                         | 0,744371447 | 0,150133767 |    |
| 532 | KQISVRGL       | Glycogen phosphorylase                                    | 2,126584977 | 0,877314494 |    |
| 533 | KLINSIADT      | Serine/threonine-protein kinase STE7                      | 0,897695211 | 0,192879085 |    |
| 534 | LDDQYTSSS      | Tyrosine-protein kinase Tec                               | 2,368344669 | 1,240289446 |    |
| 535 | PYDNYVPSA      | platelet-derived growth factor receptor                   | 1,392619835 | 0,432705329 |    |
| 536 | SRQLSSGVS      | Heat Shock Protein 27                                     | 0,823251364 | 0,259129022 |    |
| 537 | KNIVTPRTP      | Myelin basic protein                                      | 1,789495306 | 0,38967446  |    |
| 538 | LKLASPELE      | Transcription factor AP-2                                 | 0,646203781 | 0,071760154 |    |
| 539 | QLIDSMANS      | mitogen-activated protein kinase kinase 1                 | 0,741696284 | 0,162631313 |    |
| 540 | IVYKSPVVS      |                                                           | 0,967796535 | 0,261122303 |    |
| 541 | NGYISAAEL      | Calmodulin                                                | 1,239538015 | 0,281151722 |    |
| 542 | EILNSPEKA      | 14-3-3 protein alpha/beta/delta/zeta                      | 0,56010688  | 0,06926963  |    |
| 543 | ESPESTEIT      | insulin-like growth factor binding protein 1              | 0,780956365 | 0,116390713 |    |
| 544 | KRPSHRAKA      | Myelin basic protein                                      | 2,2732208   | 0,259766787 | On |
| 545 | NNYVYIDPT      | Mast/stem cell growth factor receptor                     | 1,18543404  | 0,18088421  |    |
| 546 | PYKFPSSPLRIPGZ |                                                           | 0,773723569 | 0,321593073 |    |
| 547 | GSPRTPRRG      | Retinoblastoma-associated protein                         | 3,176986269 | 1,200241481 |    |
| 548 | DADEYLIPQ      | EGF Receptor                                              | 1,721178127 | 0,324334079 | On |
| 549 | DRLVSARSV      | Receptor tyrosine kinase for hepatocyte growth factor     | 1,189330472 | 0,158828975 |    |
| 550 | GGLTSPGLS      | Keratin 8                                                 | 0,543351374 | 0,194736874 |    |
| 551 | GTVPSDNID      | Beta-2 adrenergic receptor                                | 0,718567614 | 0,15934564  |    |
| 552 | EGSAYEEVP      | 1-phosphatidylinositol-4,5-bisphosphate phosphodiesterase | 1,392268488 | 0,498523579 |    |
| 553 | ESIISQETY      | Alpha-S2 casein                                           | 1,50809712  | 0,247239753 |    |
| 554 | RVRKSKGKY      | glutamate receptor 2                                      | 5,038627966 | 1,4551681   | On |
| 555 | SNDSTSVSA      | muscarinic acetylcholine receptor M2                      | 0,87241229  | 0,163640323 |    |
| 556 | RRPTVA         | Protein phosphatase inhibitor 2                           | 1,554687148 | 0,170617866 | On |
| 557 | AEPDYGALY      | 1-phosphatidylinositol-4,5-bisphosphate phosphodiesterase | 1,964256372 | 0,321816953 | On |
| 558 | AVASSPSKA      | myristolated alanine-rich C-kinase substrate (MARCKS)     | 0,873788746 | 0,230432953 |    |
| 559 | DPGTSYRTR      | pyruvate dehydrogenase E1                                 | 1,201764708 | 0,163139806 |    |



|     |                |                                                  |             |             |    |
|-----|----------------|--------------------------------------------------|-------------|-------------|----|
| 560 | GEGTYGVVY      | cell division control protein 2                  | 1,065082395 | 0,044082062 |    |
| 561 | RLRLSPSPT      | Lamin C                                          | 1,398640759 | 0,037312797 | On |
| 562 | RKASRKE        | Histone H2B                                      | 1,85814553  | 0,389176276 | On |
| 563 | LRRWSLG        | pyruvate kinase                                  | 1,160989487 | 0,122687188 |    |
| 564 | RRVTSATRR      | glial fibrillary acidic protein                  | 3,969938003 | 1,348434413 | On |
| 565 | SLQASIVTD      | guanine nucleotide-binding protein alpha         | 0,97774489  | 0,453052142 |    |
| 566 | RRATPA         | pyruvate kinase                                  | 1,50309006  | 0,241084865 |    |
| 567 | ADGIYAASG      | Tyrosine-protein kinase transforming protein Fes | 1,311906762 | 0,037949873 | On |
| 568 | TGDTYTAHA      | Tyrosine-protein kinase Dash/Abl                 | 0,773322607 | 0,10728709  |    |
| 569 | TVSKTETSQ      | Rhodopsin                                        | 0,61736519  | 0,055285963 |    |
| 570 | WSDTQGDE       | 14-3-3 protein zeta                              | 1,442683181 | 0,253274758 |    |
| 571 | RKFSSARPE      | Sodium channel protein                           | 1,409853341 | 0,170950165 | On |
| 572 | KKKKASVA       | pyruvate kinase                                  | 1,817183711 | 0,472201668 |    |
| 573 | LRRASLG        | pyruvate kinase                                  | 1,795664468 | 0,377669699 |    |
| 574 | YKNDYYRKR      | Ros proto-oncogene tyrosine kinase               | 1,917563395 | 0,208181201 | On |
| 575 | SSEITTKDL      | Prothymosin                                      | 1,048233392 | 0,213357381 |    |
| 576 | PLSRTLVS       | glycogen synthase                                | 1,312707219 | 0,126139225 | On |
| 577 | LRRASLRG       | pyruvate kinase                                  | 3,886972621 | 0,634933342 | On |
| 578 | TEGQYELQP      | Tyrosine-protein kinase Blk                      | 1,696965455 | 0,405938458 |    |
| 579 | TSPSSPAS       | phosphorylcholine transferase                    | 0,778433674 | 0,395331162 |    |
| 580 | PPSAYGSVK      | Annexin II                                       | 1,645669709 | 0,721941552 |    |
| 581 | RTKRSGSV       | phosphorylase b kinase beta                      | 3,443552741 | 0,505836045 | On |
| 582 | KRFGSKAHM      | nitric-oxide synthase                            | 3,251722258 | 0,53754921  | On |
| 583 | LNDSEEEED      | E7 protein                                       | 1,437703243 | 0,298400367 |    |
| 584 | QRATSNVFA      | Myosin regulatory light chain 3                  | 0,823533813 | 0,028396271 |    |
| 585 | SRSRTPSLP      |                                                  | 1,711649949 | 0,339971807 |    |
| 586 | KRPSARAKA      | Myelin basic protein                             | 3,531987297 | 0,589030414 | On |
| 587 | LRAPSWIDT      | Alpha crystallin B                               | 1,285137959 | 0,263844149 |    |
| 588 | QRRTSVSGE      | cAMP-dependent protein kinase                    | 0,971128084 | 0,196396321 |    |
| 589 | HATPSPVD       | Myb proto-oncogene protein                       | 0,655870304 | 0,074040576 |    |
| 590 | KRPSQRAKA      | Myelin basic protein                             | 1,718034354 | 0,538527257 |    |
| 591 | EDAESEDEE      | Nucleophosmin                                    | 1,457754263 | 0,674052731 |    |
| 592 | ENAEYLRVA      | EGF Receptor                                     | 1,052359942 | 0,474977679 |    |
| 593 | HKRKSSQAL      | Transforming protein erbA                        | 1,519014388 | 0,414831076 |    |
| 594 | LAYESHESL      | Matrix Gla-protein                               | 0,995637009 | 0,188989229 |    |
| 595 | PYKFPSSPLRIPGZ |                                                  | 0,91088048  | 0,097664154 |    |
| 596 | GGVDYKNIH      | Macrophage colony stimulating factor I receptor  | 0,759619973 | 0,136036754 |    |
| 597 | ALRPSTSRS      | vimentin                                         | 1,128187932 | 0,322944133 |    |
| 598 | DEAATKTQT      | myosin II heavy chain                            | 1,171222798 | 0,439717146 |    |
| 599 | FARKSTRRS      | pleckstrin                                       | 2,684572143 | 1,20591423  |    |
| 600 | GLGESRKDK      | myelin                                           | 1,141902543 | 0,447381652 |    |
| 601 | DTHRTPSRS      | Proto-oncogene tyrosine-protein kinase Src       | 1,012455935 | 0,288086606 |    |
| 602 | EKESSNDST      | muscarinic acetylcholine receptor M2             | 0,83650339  | 0,120459539 |    |
| 603 | RRAISGLT       | dihydropyridine-sensitive calcium channel        | 0,633490457 | 0,089426003 |    |
| 604 | SAYRSVDEV      | 2-oxoisovalerate dehydrogenase alpha             | 0,901193054 | 0,177590448 |    |
| 605 | NTVSTSLGH      | muscarinic acetylcholine receptor M2             | 1,338093189 | 0,385580672 |    |
| 606 | RASLG          |                                                  | 1,27477599  | 0,744538749 |    |
| 607 | AKDASKRGR      | myelin                                           | 2,147409925 | 0,534682968 | On |
| 608 | DDEASTTVS      | Rhodopsin                                        | 0,732304247 | 0,261651432 |    |
| 609 | ETAESSQAE      | Neuromodulin                                     | 0,728703774 | 0,030576782 |    |
| 610 | YTRFSLARQ      | Transferrin receptor protein 1                   | 1,181655746 | 0,270166308 |    |
| 611 | SPKQSPSSS      | phosphorylcholine transferase                    | 0,577380314 | 0,113662197 |    |
| 612 | RKRSRKE        | Histone H2B                                      | 0,919949971 | 0,112969757 |    |
| 613 | RPPGFSPFR      |                                                  | 1,369547163 | 0,350370405 |    |
| 614 | SARVYENVG      | Protein-tyrosine phosphatase 3                   | 0,847534965 | 0,29006943  |    |
| 615 | NRSASEPSL      | RAF proto-oncogene ser/thr-protein kinase        | 0,753863799 | 0,185366952 |    |

|     |                |                                                           |             |             |    |
|-----|----------------|-----------------------------------------------------------|-------------|-------------|----|
| 616 | KGYSLG         | Lysozyme C                                                | 0,834488426 | 0,16628348  |    |
| 617 | SSSSSPKAE      | myristolated alanine-rich C-kinase substrate (MARCKS)     | 0,471143451 | 0,098276248 |    |
| 618 | TKKTSFVNF      | eukaryotic translation initiation factor 2 beta           | 1,679690058 | 0,601411322 |    |
| 619 | VEPLTPSGE      | EGF Receptor                                              | 0,600338666 | 0,095949677 |    |
| 620 | YRLPSNVQD      | Alpha crystallin A                                        | 0,72623005  | 0,161558693 |    |
| 621 | SPAISIHEI      | phosphorylase b kinase alpha                              | 0,901002601 | 0,207977633 |    |
| 622 | RKQISVR        | Glycogen phosphorylase                                    | 1,018242667 | 0,307274673 |    |
| 623 | VGWPTVRER      | Nef                                                       | 1,543220485 | 0,606941523 |    |
| 624 | QTYRSFHD       | cGMP-dependent protein kinase (PKG)                       | 1,021896292 | 0,159593666 |    |
| 625 | LRRASLGAA      | pyruvate kinase                                           | 2,054689267 | 0,558443746 |    |
| 626 | PRKGSPPRG      | Histone H2B.2                                             | 0,81129745  | 0,211038819 |    |
| 627 | SSPASLSRA      | phosphorylcholine transferase                             | 0,937045913 | 0,40705362  |    |
| 628 | TKAASEKKS      | myelin                                                    | 0,783625713 | 0,204422393 |    |
| 629 | LRRPSDQEV      | c-Rel proto-oncogene protein                              | 0,815367538 | 0,047473919 |    |
| 630 | PSAPSPQPK      | Tyrosine 3-monooxygenase                                  | 0,803927574 | 0,051130338 |    |
| 631 | KAKVTGRWK      | troponin T                                                | 4,294721586 | 0,842425758 | On |
| 632 | KRPTQRAKY      | Myelin basic protein                                      | 5,230872505 | 1,410454126 | On |
| 633 | PLSRTL SVRSL   | Glycogen [starch] synthase                                | 1,828419784 | 0,262127923 | On |
| 634 | QSPGSPLEE      | Neutrophil cytosol factor 5                               | 0,825373427 | 0,172318735 |    |
| 635 | KGGSYSQAA      | HLA class I histocompatibility antigen B7                 | 1,356278799 | 0,099934833 | On |
| 636 | KRRRSSKDT      | glutamate (NMDA) receptor subunit zeta 4                  | 2,569810903 | 0,211690166 | On |
| 637 | KAQISVRGL      | Glycogen phosphorylase                                    | 0,956683298 | 0,250800199 |    |
| 638 | HRTPSRSFG      | Proto-oncogene tyrosine-protein kinase Src                | 1,46517827  | 0,346037277 |    |
| 639 | LSGFSPKKN      | myristolated alanine-rich C-kinase substrate              | 1,527181728 | 0,368885238 |    |
| 640 | EEEEYMPME      | Middle T antigen                                          | 0,964219601 | 0,084104906 |    |
| 641 | EQFSTVKGV      | G protein-coupled receptor kinase 6                       | 0,885773803 | 0,188757186 |    |
| 642 | IDKISRIGF      | glycine receptor alpha                                    | 0,757767397 | 0,0312777   |    |
| 643 | MHRQETVDA      | calcium/calmodulin-dependent protein kinase type II alpha | 0,63614436  | 0,137480687 |    |
| 644 | PYKFPSSPLRIPGZ |                                                           | 0,791984661 | 0,253243942 |    |
| 645 | GNHTYQEIA      | Paxillin                                                  | 0,734454143 | 0,185444755 |    |
| 646 | APVASPAAP      | synapsins IA and IB                                       | 0,726133044 | 0,023968023 |    |
| 647 | DGNNSEDES      | calsequestrin                                             | 1,205857922 | 0,402209219 |    |
| 648 | FMTEYVTR       | mitogen-activated protein kinase MSK7                     | 0,845623809 | 0,084390832 |    |
| 649 | GRGLSLSRF      | Myelin basic protein                                      | 1,430208594 | 0,261542061 |    |
| 650 | EDTLSDSDD      | N-myc proto-oncogene protein                              | 1,521781757 | 0,529836549 |    |
| 651 | ENQASEEED      | Dopamine- and cAMP-regulated neuronal phosphoprotein      | 0,815151689 | 0,167919598 |    |
| 652 | RRPTSPVSR      | Early E1A                                                 | 2,035010464 | 0,609541606 |    |
| 653 | SFMDSSGLG      | anti-sigma F factor antagonist                            | 0,898156507 | 0,170514177 |    |
| 654 | QKRPSQRSK      | Myelin basic protein                                      | 2,131937768 | 0,512718798 | On |
| 655 | SDEEH          | initiation factor 5A                                      | 0,695773994 | 0,017107813 |    |
| 656 | APLTPGGRR      | Myelin basic protein                                      | 3,609371701 | 2,771065768 |    |
| 657 | DEPSTPYHS      | Protein phosphatase inhibitor 2                           | 0,778589541 | 0,106598859 |    |
| 658 | FGSRSLYGL      | keratin, type II                                          | 0,95049643  | 0,095195334 |    |
| 659 | RDPVTENAV      | muscarinic acetylcholine receptor M2                      | 0,642689782 | 0,091288056 |    |
| 660 | AVRRSDRA       | Troponin I                                                | 1,434890996 | 0,507145455 |    |
| 661 | VKRGSGL        | Histone H4                                                | 1,255943578 | 0,359371547 |    |
| 662 | RRKDTPALH      |                                                           | 0,88552614  | 0,18903655  |    |
| 663 | SEITTKDLK      | Prothymosin                                               | 0,805899713 | 0,028113907 |    |
| 664 | PNVSYIASR      | protein kinase shaggy                                     | 1,123264835 | 0,193335184 |    |
| 665 | RRDSV          | pyruvate kinase                                           | 1,079041753 | 0,171535685 |    |
| 666 | STRRSIRLP      | pleckstrin                                                | 3,492126586 | 1,496085238 |    |
| 667 | TPQVSDTMR      | glycogenin                                                | 0,736677753 | 0,093786571 |    |
| 668 | VNATYVNVK      | Receptor tyrosine kinase for hepatocyte growth factor     | 0,720793201 | 0,091563527 |    |
| 669 | RAAHSIKGG      | Chemotaxis protein cheA                                   | 1,429157114 | 0,399293965 |    |
| 670 | SPSLSRHSS      | Glycogen [starch] synthase                                | 1,767603595 | 0,520356583 |    |
| 671 | RTPPPSG        | Myelin basic protein                                      | 0,919852791 | 0,198361304 |    |

|     |                |                                                         |             |             |    |
|-----|----------------|---------------------------------------------------------|-------------|-------------|----|
| 672 | VRKRTLRL       | EGF Receptor                                            | 2,750935362 | 1,440513592 |    |
| 673 | SRKSGFGH       | gap junction beta-1 protein                             | 1,484724053 | 0,576126472 |    |
| 674 | LSGESDLEI      | DNA topoisomerase II                                    | 1,028773507 | 0,261534966 |    |
| 675 | PSQRSKYLA      | Myelin basic protein                                    | 0,769514327 | 0,173526011 |    |
| 676 | STDEYLDLS      | Receptor tyrosine kinase                                | 2,586164523 | 1,820478231 |    |
| 677 | TNHIYSNLA      | Mast/stem cell growth factor receptor                   | 1,011339431 | 0,099986581 |    |
| 678 | LSRHSSPHQ      | Glycogen [starch] synthase                              | 1,839144945 | 0,724948038 |    |
| 679 | PTRHSRVAE      | Lamin                                                   | 0,956673981 | 0,114660185 |    |
| 680 | KISITSRKA      | GTP-binding protein era                                 | 2,575170315 | 0,9892779   |    |
| 681 | KSKISASRK      | troponin I                                              | 3,07351449  | 0,936525355 | On |
| 682 | KRKQISVGGL     | Glycogen phosphorylase                                  | 1,3125776   | 0,276743366 |    |
| 683 | SRALSRQLS      | Heat Shock Protein 27                                   | 2,655906991 | 0,876349811 |    |
| 684 | KKKFSFKKP      | MARCKS-related protein                                  | 4,030889388 | 0,693814642 | On |
| 685 | KTRSSRAGL      | Histone H2A                                             | 2,943096401 | 0,520507589 | On |
| 686 | PAPGSPPEP      | Early E1A                                               | 1,155109577 | 0,512695673 |    |
| 687 | IGSESTEDQ      | Alpha-S1 casein                                         | 0,949738609 | 0,080333081 |    |
| 688 | MRRNSFTPL      | fructose-2,6-bisphosphatase                             | 0,881340884 | 0,13355417  |    |
| 689 | EEQEYVQTV      | Annexin I                                               | 0,968202401 | 0,068998282 |    |
| 690 | ERRVSNAGG      | vasodilator-stimulated phosphoprotein                   | 0,702163636 | 0,146816009 |    |
| 691 | IREESPPTS      | Glycoprotein IV                                         | 0,517027014 | 0,07586926  |    |
| 692 | NDSVYANWM      | Probable receptor with tyrosine-protein kinase activity | 1,035943031 | 0,120500083 |    |
| 693 | PYKFPSSPLRIPGZ |                                                         | 0,674109808 | 0,125689131 |    |
| 694 | GRRESLTSF      | inositol 1,4,5-trisphosphate-binding protein            | 1,234246638 | 0,134047136 |    |
| 695 | ARVFSVLRE      | Ser/Thr poetin phosphatase 2B                           | 1,204603235 | 0,034171115 | On |
| 696 | DLPLPSAF       | tristetraproline                                        | 1,085884971 | 0,083988623 |    |
| 697 | GDKKSKKAK      | Na+/K+ ATPase 1                                         | 1,305285567 | 0,217269748 |    |
| 698 | GSDVSFNEE      | DNA topoisomerase II                                    | 1,28296444  | 0,263695577 |    |
| 699 | EEKGSPLNA      | Protein tyrosine phosphatase 1B                         | 0,5698714   | 0,107253303 |    |
| 700 | ERQKTQTKL      | myosin light chain kinase                               | 0,846573592 | 0,054087775 |    |
| 701 | RRRSSKDTS      | glutamate (NMDA) receptor subunit zeta 3                | 1,298360602 | 0,105981784 | On |
| 702 | SKAGSLGNI      |                                                         | 0,696577571 | 0,246568248 |    |
| 703 | MSGDEM         | eukaryotic translation initiation factor 2 beta         | 0,560497735 | 0,066038409 |    |
| 704 | AAATTPAAE      | neuromodulin                                            | 0,611815188 | 0,260133588 |    |
| 705 | ARKKSSAQL      | ras-related protein rap-1b                              | 0,965586432 | 0,245224115 |    |
| 706 | DKVTSPTKV      | caldesmon                                               | 0,600410728 | 0,130179898 |    |
| 707 | FRRFTPDSL      | Sodium channel protein                                  | 0,901395522 | 0,336142583 |    |
| 708 | RFTDTRKDE      | elongation factor 4                                     | 0,787260918 | 0,039167005 |    |
| 709 | RKISASEA       |                                                         | 0,752814035 | 0,228527036 |    |
| 710 | LARASLG        | pyruvate kinase                                         | 1,065869747 | 0,072211894 |    |
| 711 | RRRLSSLRA      | 40S ribosomal protein S6                                | 1,11123412  | 0,02821603  | On |
| 712 | SGYISSLEY      | Complement C1r                                          | 1,556294632 | 0,401984236 |    |
| 713 | LARNSI         | cystic fibrosis transmembrane conductance regulator     | 0,631648604 | 0,062709103 |    |
| 714 | TIAVG          | Photosystem Q(A)                                        | 0,656516111 | 0,068119151 |    |
| 715 | TADISEDEE      | phosphorylcholine transferase                           | 1,681626942 | 0,164496187 | On |
| 716 | TRQTSVSGQ      | synapsins IA and IB                                     | 0,681341314 | 0,034916997 |    |
| 717 | VSEEYDLDR      | Fibroblast growth factor receptor 4                     | 1,760882308 | 0,629685683 |    |
| 718 | REQESSGEE      | Protein phosphatase inhibitor 2                         | 0,814626513 | 0,205461945 |    |
| 719 | GTKRSGSV       | phosphorylase b kinase beta                             | 1,560103992 | 0,132329588 | On |
| 720 | NRLQTMKEE      | Lamin C                                                 | 0,695180493 | 0,151904077 |    |
| 721 | VVELSGESD      | DNA topoisomerase II                                    | 1,104149187 | 0,097318607 |    |
| 722 | SRRPSRATW      | Vitronectin                                             | 2,907050022 | 0,543816583 | On |
| 723 | PASQTPNKT      | Proto-oncogene tyrosine-protein kinase Src              | 0,932714806 | 0,366049642 |    |
| 724 | QDPVSPSLV      | muscarinic acetylcholine receptor M2                    | 0,854412458 | 0,077241638 |    |
| 725 | STTVSKTET      | Rhodopsin                                               | 0,723298887 | 0,100532073 |    |
| 726 | TRKISASEF      |                                                         | 0,650296381 | 0,087592971 |    |
| 727 | PGPQSPGSP      | Neutrophil cytosol factor 4                             | 0,549180275 | 0,050806805 |    |

|     |                |                                                         |             |             |    |
|-----|----------------|---------------------------------------------------------|-------------|-------------|----|
| 728 | KQGSGRGL       | Glycogen phosphorylase                                  | 1,815548021 | 0,044490171 | On |
| 729 | KKSWSRWTL      | parathyroid hormone/parathyroid hormone-related peptide | 3,651610696 | 0,552313612 | On |
| 730 | LASSSKEEN      | Cystatin S                                              | 0,837482204 | 0,144626574 |    |
| 731 | PLRRTLVA       | glycogen synthase                                       | 1,099899789 | 0,121643592 |    |
| 732 | SRPSSNRSY      | vimentin                                                | 2,157375714 | 0,410426085 | On |
| 733 | KNDYYRKRK      | Ros proto-oncogene tyrosine kinase                      | 2,101304201 | 0,218843029 | On |
| 734 | LIEDAEYTA      | Proto-oncogene tyrosine-protein kinase Lck, Fyn, Yes    | 1,369805466 | 0,467727785 |    |
| 735 | QKAQTERKS      | troponin T                                              | 1,019958787 | 0,120025218 |    |
| 736 | ISTESQPNG      | phosphorylase b kinase alpha                            | 0,601329245 | 0,243136081 |    |
| 737 | NGNNYVYID      | Mast/stem cell growth factor receptor                   | 1,126266372 | 0,201193938 |    |
| 738 | EIKKSWSRW      | parathyroid hormone/parathyroid hormone-related peptide | 1,228469485 | 0,386382002 |    |
| 739 | ESPASDEAE      | Nonhistone chromosomal protein HMG-14                   | 1,011021195 | 0,276518347 |    |
| 740 | KRKSSQALV      | Transforming protein erbA                               | 1,830466867 | 0,72892158  |    |
| 741 | NNMPSSDDG      | muscarinic acetylcholine receptor M2                    | 0,787296828 | 0,409291777 |    |
| 742 | PYKFPSSPLRIPGZ |                                                         | 1,029364078 | 0,598540041 |    |
| 743 | GSPGTPGSR      |                                                         | 0,896711607 | 0,145955352 |    |
| 744 | AVVRTPPKS      |                                                         | 1,511207782 | 0,361182941 |    |
| 745 | DRKLSTKEA      | multidrug resistance protein 2                          | 0,723397171 | 0,148709068 |    |
| 746 | GGIRSLNVA      | isocitrate dehydrogenase                                | 0,92065921  | 0,188607853 |    |
| 747 | GTRLRLARM      | glial fibrillary acidic protein                         | 1,463308988 | 0,10618582  | On |
| 748 | EGNKSPAPK      | Actin and myosin binding protein                        | 0,941842258 | 0,357722429 |    |
| 749 | ESHESMESY      | Matrix Gla-protein                                      | 0,87318668  | 0,286013553 |    |
| 750 | RVRISADAM      | Troponin I                                              | 0,718627972 | 0,114301202 |    |
| 751 | SNDDSDDDD      | calsequestrin                                           | 1,233965536 | 0,485289665 |    |
| 752 | RRPTPA         | Protein phosphatase inhibitor 3                         | 1,502319574 | 0,273440811 |    |
| 753 | AEGSSNVFS      | Myosin regulatory light chain 2                         | 0,8361606   | 0,324029055 |    |
| 754 | AVADSESED      | cAMP-dependent protein kinase II (PKA)                  | 1,239914275 | 0,211022524 |    |
| 755 | DNPDYQQDF      | EGF Receptor                                            | 2,463165545 | 0,679524086 | On |
| 756 | GDVKYADIE      | platelet-derived growth factor receptor                 | 1,142458449 | 0,125619565 |    |
| 757 | RLQDYEEKT      | Connection of cytoskeletal structure to plasma membrane | 1,061751705 | 0,320084921 |    |
| 758 | FKKSFKL        | myristolated alanine-rich C-kinase substrate            | 2,252431822 | 1,091995002 |    |
| 759 | LRRPSLG        | pyruvate kinase                                         | 2,083823909 | 0,429752823 | On |
| 760 | RRVRSQEPG      | somatostatin receptor type 4                            | 1,093681667 | 0,067399185 |    |
| 761 | SLDDSGSAM      | alpha-1B adrenergic receptor                            | 0,814786427 | 0,322361004 |    |
| 762 | RRASVA         | pyruvate kinase                                         | 1,862755964 | 0,412656619 |    |
| 763 | ADDEYAPKQ      | Tyrosine-protein kinase Src64B                          | 1,158437268 | 0,295682355 |    |
| 764 | TESQYQQQP      | Tyrosine-protein kinase Hck                             | 0,753919952 | 0,178153794 |    |
| 765 | TVKSSKGGP      | Annexin I                                               | 1,15721777  | 0,259184585 |    |
| 766 | WTSDSAGEE      | 14-3-3 protein tau                                      | 1,560187923 | 0,414732399 |    |
| 767 | RKAASVIAK      | DNA polymerase beta                                     | 2,169470478 | 0,4891698   | On |
| 768 | LRRASLDG       | pyruvate kinase                                         | 0,924905356 | 0,192536008 |    |
| 769 | LRRASGG        | pyruvate kinase                                         | 1,264343609 | 0,147118393 |    |
| 770 | YHTTSHPGT      | Band 3 anion transport protein                          | 0,984372613 | 0,198270625 |    |
| 771 | SSEESITRI      | Beta casein                                             | 1,033766921 | 0,246477575 |    |
| 772 | PLAGSPVIA      | casein kinase II                                        | 0,966530379 | 0,211865003 |    |
| 773 | LGSPLRRR       | vimentin                                                | 4,757057708 | 1,450515024 | On |
| 774 | TEDQYSLVE      | PI3-kinase p85-alpha                                    | 2,341298622 | 1,227487159 |    |
| 775 | TRTYSLGSA      | vimentin                                                | 1,162048351 | 0,249851407 |    |
| 776 | PPSAYATVK      | Annexin II                                              | 1,089950904 | 0,205213148 |    |
| 777 | RTKRSGSV       | phosphorylase b kinase beta                             | 3,071184813 | 0,319615936 | On |
| 778 | KREASLDNQ      | Phytochrome A                                           | 0,764859063 | 0,072299644 |    |
| 779 | LMDKYHVDN      | Early E2A                                               | 0,730317789 | 0,129820436 |    |
| 780 | QQGMTVYGL      | calponin alpha and beta                                 | 1,164697085 | 0,185167124 |    |
| 781 | SRSRSRSRS      | Lamin B receptor                                        | 6,73493067  | 0,28156558  | On |
| 782 | KRNSSPPPS      |                                                         | 1,759353711 | 0,175595192 | On |
| 783 | LQRYSSDPT      | EGF Receptor                                            | 0,819863097 | 0,202232547 |    |

|     |                |                                                          |             |             |    |
|-----|----------------|----------------------------------------------------------|-------------|-------------|----|
| 784 | QRRTSLTGS      | Volt.-dep. L-type calcium channel alpha-1S               | 1,895901174 | 0,554972418 |    |
| 785 | GVRQSRASD      | T-cell surface glycoprotein CD3 gamma                    | 0,710578823 | 0,058602287 |    |
| 786 | KRPSNRAKA      | Myelin basic protein                                     | 1,968024937 | 0,306857054 | On |
| 787 | EAVTSPRFI      | Tyrosine 3-monooxygenase                                 | 0,808334831 | 0,089867915 |    |
| 788 | EMTGYVATR      | Mitogen-activated protein kinase p38                     | 0,931467931 | 0,257189583 |    |
| 789 | HKIKSGAEA      | DNA polymerase beta                                      | 0,961082242 | 0,156489826 |    |
| 790 | LARRSTTDA      | Choriogonadotropin beta                                  | 0,75874194  | 0,096689685 |    |
| 791 | PYKFPSSPLRIPGZ |                                                          | 0,889015923 | 0,236554448 |    |
| 792 | GGTGTPNKE      | Actin and myosin binding protein                         | 0,704048427 | 0,176228515 |    |
| 793 | ALGISYGRK      | TAT protein                                              | 2,36539958  | 0,298172943 | On |
| 794 | DDSGSAMSG      | alpha-1B adrenergic receptor                             | 0,64904138  | 0,154303948 |    |
| 795 | EYVQTVKSS      | Annexin I                                                | 0,826795103 | 0,086883171 |    |
| 796 | GKTDYMGEA      | Beta-2 adrenergic receptor                               | 1,030958485 | 0,096433143 |    |
| 797 | DSTYYKASK      | Focal adhesion kinase                                    | 1,250427023 | 0,184530484 |    |
| 798 | EKEISDDEA      | Heat Shock Protein 90-beta                               | 0,985087667 | 0,215064296 |    |
| 799 | RRADSLQKN      | iron-responsive element binding protein                  | 0,827827734 | 0,135721397 |    |
| 800 | SAYGSVKAY      | Annexin II                                               | 0,790456629 | 0,109304586 |    |
| 801 | NTSSSPQPK      | p53                                                      | 1,141520471 | 0,372493169 |    |
| 802 | GSRRR          | protamine                                                | 4,434259582 | 1,957631368 |    |
| 803 | AKAKTTKKR      | Myosin regulatory light chain 2                          | 4,045022302 | 0,754106519 | On |
| 804 | DDAYSDET       | Protein phosphatase inhibitor 2                          | 3,609050434 | 1,825575327 |    |
| 805 | ESVDYVPMML     | platelet-derived growth factor receptor                  | 1,553985158 | 0,390584776 |    |
| 806 | YSTDYREG       | TrkC tyrosine kinase                                     | 2,017186447 | 0,44521065  | On |
| 807 | SPKKSPRKA      | Histone H4                                               | 2,358293161 | 0,402115618 | On |
| 808 | RKRSRKA        | Histone H2B                                              | 3,123399579 | 0,999033223 | On |
| 809 | RPPASPSQ       | synapsins IA and IB                                      | 1,003036646 | 0,256939874 |    |
| 810 | SARLSAKPA      | Nonhistone chromosomal protein HMG-14                    | 1,286279134 | 0,112961079 | On |
| 811 | NRQSSQARV      | Phytochrome A                                            | 1,492836308 | 0,301811071 |    |
| 812 | KEAKSD         | Nonhistone chromosomal protein HMG-14                    | 0,857547593 | 0,273337953 |    |
| 813 | SSSNTIRRP      | fructose-2,6-bisphosphatase                              | 2,466340722 | 0,634253503 | On |
| 814 | TKKQSFKQT      | cystic fibrosis transmembrane conductance regulator      | 1,328976361 | 0,036307096 | On |
| 815 | VDSAYEVIK      | L-lactate dehydrogenase M                                | 1,910046622 | 0,571627291 |    |
| 816 | YRKSSLKSR      | spermatid nuclear transition protein 3                   | 3,578991796 | 0,698627836 | On |
| 817 | SNVSSTGSI      |                                                          | 1,089904691 | 0,334754663 |    |
| 818 | RARSRKE        | Histone H2B                                              | 1,997557411 | 0,259354347 | On |
| 819 | VGPGYLGSG      | Probable receptor with tyrosine-protein kinase activity  | 0,70618599  | 0,072053241 |    |
| 820 | QTVKSSKGG      | Annexin I                                                | 1,383134127 | 0,117784308 | On |
| 821 | LRMFSEKAP      | Gamma-aminobutyric-acid receptor gamma-2                 | 1,397983639 | 0,097299736 | On |
| 822 | PRHLSNVSS      |                                                          | 0,894584142 | 0,207356819 |    |
| 823 | SSNEYMDMK      | Mast/stem cell growth factor receptor                    | 1,273598167 | 0,305713397 |    |
| 824 | THYGSLPQK      | Myelin basic protein                                     | 1,251845322 | 0,111867508 |    |
| 825 | LRRPSDQAV      | Transforming protein rel                                 | 0,980907953 | 0,208168636 |    |
| 826 | PRRNSRASL      | Sodium channel protein type II alpha                     | 0,80662564  | 0,037618188 |    |
| 827 | KAKTTKKRP      | Myosin regulatory light chain 2                          | 5,04686785  | 1,366730383 | On |
| 828 | KRPSGRAKA      | Myelin basic protein                                     | 3,853971065 | 0,679176837 | On |
| 829 | PLSKTSLVSSL    | Glycogen [starch] synthase                               | 1,017641624 | 0,15993676  |    |
| 830 | QSGMTEYVA      | Mitogen-activated protein kinase FUS3                    | 1,087135521 | 0,369010737 |    |
| 831 | KGATSDEED      | DNA topoisomerase II                                     | 0,992314925 | 0,248527783 |    |
| 832 | KRRNSEFEI      | tryptophan 5-monooxygenase                               | 1,184427305 | 0,225520884 |    |
| 833 | LTRRASFSAQ     | Regulatory protein ADR1                                  | 1,99328378  | 0,648521753 |    |
| 834 | HRQETVEAL      | calcium/calmodulin-dependent protein kinase type II beta | 0,624826963 | 0,048608247 |    |
| 835 | LRRFSLATM      | Cytochrome P450 2B1                                      | 1,412651788 | 0,257341245 |    |
| 836 | EEEAYGWMD      | Gastrin                                                  | 1,808372392 | 0,465043723 |    |
| 837 | EQESSGEED      | Protein phosphatase inhibitor 2                          | 0,880397971 | 0,116448979 |    |
| 838 | IAADSEAEQ      | Insulin receptor substrate 7                             | 0,921157403 | 0,238282124 |    |
| 839 | MGEASGAQL      | Beta-2 adrenergic receptor                               | 0,73285026  | 0,099613803 |    |



|     |                |                                                         |             |             |    |
|-----|----------------|---------------------------------------------------------|-------------|-------------|----|
| 840 | PYKFPSSPLRIPGZ |                                                         | 0,758317084 | 0,071105668 |    |
| 841 | GNGDYMPMS      | Insulin receptor substrate 8                            | 0,866421082 | 0,269603657 |    |
| 842 | APRYPGGRR      | Myelin basic protein                                    | 3,256439272 | 1,668133285 |    |
| 843 | DGNKSPAPK      | caldesmon                                               | 1,058313177 | 0,465306436 |    |
| 844 | FMTEYVATR      | mitogen-activated protein kinase                        | 0,95157738  | 0,209052402 |    |
| 845 | GRASSHSSQ      | Lamin C                                                 | 1,622314655 | 0,151619157 | On |
| 846 | EDSTYYKAS      | Focal adhesion kinase                                   | 1,534897289 | 0,2194986   | On |
| 847 | ENPQYFRQG      | TrkC tyrosine kinase                                    | 0,719868047 | 0,127418218 |    |
| 848 | RRPTPATVA      | Protein phosphatase inhibitor 4                         | 1,279496908 | 0,079764299 | On |
| 849 | SFKLSGFSF      | myristolated alanine-rich C-kinase substrate            | 0,825516726 | 0,267549399 |    |
| 850 | QEKESERLA      | Beta-2 adrenergic receptor                              | 1,065855887 | 0,641154967 |    |
| 851 | RRVSV          | pyruvate kinase                                         | 2,638789603 | 0,730074394 | On |
| 852 | APFTPGGRR      | Myelin basic protein                                    | 2,702512786 | 1,266772811 |    |
| 853 | DEKLSEILG      | RNA polymerase alpha                                    | 1,487863514 | 0,920785912 |    |
| 854 | FGHNTIDAV      | bumetanide-sensitive sodium-(potassium)-chloride cotran | 1,088137758 | 0,443842606 |    |
| 855 | RDEEYGYEA      | Gamma-aminobutyric-acid receptor gamma-2                | 2,668579593 | 1,325519686 |    |
| 856 | AVRRSDAA       | Troponin I                                              | 1,08120343  | 0,071888261 |    |
| 857 | TKRSGSV        | phosphorylase b kinase beta                             | 1,362965154 | 0,068487796 | On |
| 858 | RRKATQVGE      | vasodilator-stimulated phosphoprotein                   | 1,003183116 | 0,433708513 |    |
| 859 | SEGDSSEGE      | Serum response factor                                   | 1,283951502 | 0,149849224 |    |
| 860 | PLDRSSHAQ      | Insulin Receptor (IR)                                   | 0,909836582 | 0,236472653 |    |
| 861 | RRASS          | pyruvate kinase                                         | 2,099935891 | 0,577071118 |    |
| 862 | STPLSPTRI      | Lamin A/C                                               | 1,349668381 | 0,029221986 | On |
| 863 | TPPLSPSRR      | Myc proto-oncogene protein                              | 3,094060885 | 0,805106253 | On |
| 864 | VKRISGLIY      | Histone H4                                              | 1,477866834 | 0,117280705 | On |
| 865 | RAAASRARQ      | cAMP response element-binding protein CRE-BP3           | 2,208677811 | 0,563854235 | On |
| 866 | SPRTPGGRR      | Myelin basic protein                                    | 3,698338064 | 1,262064728 | On |
| 867 | RRRRSVA        | pyruvate kinase                                         | 4,204990986 | 0,943121476 | On |
| 868 | VRFESIRLP      | Choriogonadotropin beta                                 | 1,3918834   | 0,194761923 |    |
| 869 | SRKESYSVY      | Histone H2B                                             | 0,819792617 | 0,127985941 |    |
| 870 | LSELSRRRI      | eukaryotic translation initiation factor 4F             | 3,066333478 | 0,311039171 | On |
| 871 | PSPSSRVTV      | Lamin B1                                                | 1,089026058 | 0,21075477  |    |
| 872 | SSVPTPSPL      | casein kinase II                                        | 0,709201714 | 0,138804881 |    |
| 873 | TNEEYLDLS      | Fibroblast growth factor receptor 2                     | 1,461077073 | 0,554677165 |    |
| 874 | LSRFSWGAE      | Myelin basic protein                                    | 0,739857178 | 0,080899754 |    |
| 875 | PTKRSPTKR      | Histone H2B.1                                           | 1,491994883 | 0,441207779 |    |
| 876 | KISASRKLQ      | troponin I                                              | 3,3994031   | 1,287640759 |    |
| 877 | KSFGSPNRI      | cell division protein kinase 7                          | 1,801314315 | 0,31761241  | On |
| 878 | KRKQISVAGL     | Glycogen phosphorylase                                  | 1,725196913 | 0,09465164  | On |
| 879 | SQHSTPPKK      | Large T antigen                                         | 0,913019717 | 0,086704366 |    |
| 880 | KKIDSFASN      | acetyl-CoA carboxylase                                  | 1,037536473 | 0,066039955 |    |
| 881 | KTETSQVAP      | Rhodopsin                                               | 0,616777466 | 0,044465631 |    |
| 882 | PAAPSPGSS      | synapsins IA and IB                                     | 0,672916076 | 0,109995295 |    |
| 883 | IGRFSEPHA      | cGMP-dependent protein kinase (PKG)                     | 0,793322916 | 0,139550366 |    |
| 884 | MQLKSEIKQ      | phosphorylase b kinase alpha                            | 1,560828251 | 1,089771749 |    |
| 885 | EEQEYIKTV      | Annexin I                                               | 1,737603053 | 0,297099381 | On |
| 886 | ERRPSNVSQ      | Sodium channel protein type II alpha                    | 0,69864244  | 0,085365516 |    |
| 887 | IPHPTVRT       | Retinoblastoma-associated protein                       | 1,202654861 | 0,111565087 |    |
| 888 | NDSTSVSAV      | muscarinic acetylcholine receptor M2                    | 0,674739986 | 0,245708703 |    |
| 889 | PYKFPSSPLRIPGZ |                                                         | 0,550508838 | 0,037437719 |    |
| 890 | GRPITPPRN      | ser/thr protein phosphatase PP1-alpha                   | 1,792473134 | 0,139684267 | On |
| 891 | ARTKRSGSV      | phosphorylase b kinase beta                             | 2,536866731 | 0,547087986 | On |
| 892 | DLPGETDFV      | Beta-2 adrenergic receptor                              | 1,542796968 | 0,227659927 | On |
| 893 | GALYSGSEG      | Serum response factor                                   | 0,969822673 | 0,086262596 |    |
| 894 | GRVLTLP RS     | Insulin Receptor (IR)                                   | 2,188487811 | 0,792314311 |    |
| 895 | EKESSNDS       | muscarinic acetylcholine receptor M2                    | 0,698768818 | 0,033603951 |    |



|     |                |                                                         |             |             |    |
|-----|----------------|---------------------------------------------------------|-------------|-------------|----|
| 896 | ERNLSFEIK      | protein-tyrosine phosphatase G1                         | 0,616205747 | 0,095859476 |    |
| 897 | RRRRSRRAS      | Protamine Z                                             | 3,301971715 | 1,533731401 |    |
| 898 | SIYSSDDDE      | Myb proto-oncogene protein                              | 2,510293685 | 0,647944966 | On |
| 899 | HGYSLG         | Lysozyme C                                              | 0,863020516 | 0,137054414 |    |
| 900 | AAASFKAQR      |                                                         | 1,880407604 | 0,282751138 | On |
| 901 | ARKFSSARP      | Sodium channel protein                                  | 2,05173812  | 0,446944483 | On |
| 902 | DKEYYSVHN      | Receptor tyrosine kinase for hepatocyte growth factor   | 1,099197829 | 0,396727704 |    |
| 903 | FRKLSFTES      |                                                         | 1,056825811 | 0,151347601 |    |
| 904 | RFHKSSKDS      | myelin                                                  | 0,850388187 | 0,171047141 |    |
| 905 | RAKRSGSV       | phosphorylase b kinase beta                             | 2,31815148  | 0,225359921 | On |
| 906 | KSESSQK        | 40S ribosomal protein S6                                | 0,923000149 | 0,069461453 |    |
| 907 | RRRLSDSNF      | synapsins                                               | 0,96995891  | 0,159599694 |    |
| 908 | SGKTSPSSS      | phosphorylcholine transferase                           | 0,837304598 | 0,083868438 |    |
| 909 | KSRRTI         | Interleukin-2 receptor alpha                            | 1,227040713 | 0,314933776 |    |
| 910 | TAILE          | Photosystem Q(B)                                        | 0,684211812 | 0,069544456 |    |
| 911 | SYPLSPLSD      | Cytosolic phospholipase A2                              | 1,342768138 | 0,243200321 |    |
| 912 | TRQASQAGP      | synapsins IA and IB                                     | 0,942215    | 0,145789786 |    |
| 913 | VRVYTHEVV      | cell division control protein 2                         | 0,816229989 | 0,174719377 |    |
| 914 | RENEYMPMA      | Middle T antigen                                        | 0,785874255 | 0,205654452 |    |
| 915 | GRGLSLSR       | Myelin basic protein                                    | 1,891428277 | 0,280678189 | On |
| 916 | YIYGSFK        |                                                         | 1,138718654 | 0,137916118 |    |
| 917 | VTRSSAVRL      | vimentin                                                | 1,490930497 | 0,156779752 | On |
| 918 | SRRLSQETG      | cystic fibrosis transmembrane conductance regulator     | 0,76496398  | 0,045497416 |    |
| 919 | PASPSPQRQ      | synapsins IA and IB                                     | 0,786978781 | 0,265564218 |    |
| 920 | PWRITDNEL      | bumetanide-sensitive sodium-(potassium)-chloride cotran | 1,014547938 | 0,073682038 |    |
| 921 | STSVSAVAS      | muscarinic acetylcholine receptor M2                    | 0,766582408 | 0,144106295 |    |
| 922 | TRIPSAKKY      | astrocytic phosphoprotein PEA-15                        | 1,614691666 | 0,36164114  |    |
| 923 | PGGSTPVSS      | casein kinase II                                        | 0,8236418   | 0,252965405 |    |
| 924 | QGTLKIFK       | Myelin basic protein                                    | 1,692132508 | 0,103334314 | On |
| 925 | KKRLSVERI      | DNA topoisomerase II alpha                              | 2,351573647 | 0,177464216 | On |
| 926 | KYRKSSLKS      | spermatid nuclear transition protein 4                  | 2,767244425 | 0,266119375 | On |
| 927 | PLSRRLSVA      | glycogen synthase                                       | 1,096310646 | 0,193298674 |    |
| 928 | SRLHSVRER      | sucrose synthase 2                                      | 1,92371758  | 0,29921048  | On |
| 929 | KNDKSKTWQ      | eukaryotic translation initiation factor 4E             | 1,556692386 | 0,341269728 |    |
| 930 | LGGGTFDIS      | Heat Shock Protein 70                                   | 0,984486357 | 0,30275092  |    |
| 931 | QHLKSVMLQ      | Troponin I                                              | 1,08947646  | 0,170368614 |    |
| 932 | ISQESSEEE      | high mobility group protein                             | 1,202538898 | 0,145411243 |    |
| 933 | NGDASPAAA      | myristolated alanine-rich C-kinase substrate (MARCKS)   | 0,63656953  | 0,071368595 |    |
| 934 | EHVSSSEES      | Alpha-S2 casein                                         | 0,746204031 | 0,066393202 |    |
| 935 | ESMESYEVS      | Matrix Gla-protein                                      | 1,949116364 | 0,458425455 |    |
| 936 | KQLASFEIY      | Cystatin S                                              | 0,81157536  | 0,079521379 |    |
| 937 | NMPSSDDGL      | muscarinic acetylcholine receptor M2                    | 0,813438376 | 0,120859945 |    |
| 938 | PYKFPSSPLRIPGZ |                                                         | 0,664986982 | 0,183716623 |    |
| 939 | GSLKSRKRA      | spermatid nuclear transition protein 1                  | 3,338262459 | 0,792990204 | On |
| 940 | AVRRSDRAY      | Troponin I                                              | 1,422479608 | 0,165234948 | On |
| 941 | DPTMSKSKK      | eukaryotic translation initiation factor 2 beta         | 1,381602746 | 0,159994805 | On |
| 942 | GGGTSPVFP      | Desmin                                                  | 0,769009446 | 0,074664072 |    |
| 943 | GSTSTPAPS      | ATP-citrate (pro-S-) lyase                              | 0,659977445 | 0,092587669 |    |
| 944 | EGGRTVGAG      | Elongation factor Tu-A and B                            | 0,485062463 | 0,127406193 |    |
| 945 | ESHESLESY      | Matrix Gla-protein                                      | 1,214573359 | 0,254270747 |    |
| 946 | RVLESFRAA      | voltage-gated potassium channel                         | 1,250435029 | 0,139204736 |    |
| 947 | SMANSFVGT      | mitogen-activated protein kinase kinase 1               | 0,721741317 | 0,138801588 |    |
| 948 | RRPSPA         | pyruvate kinase                                         | 1,764322282 | 0,406404377 |    |
| 949 | ADSFSLNDA      | galectin-3                                              | 1,523195646 | 0,799291238 |    |
| 950 | ATSASPPQK      | p53                                                     | 0,948456228 | 0,063125624 |    |
| 951 | DNLYYWDQD      | Receptor tyrosine-protein kinase erbB-2                 | 1,55952304  | 0,264436544 |    |

|      |                |                                                 |             |             |    |
|------|----------------|-------------------------------------------------|-------------|-------------|----|
| 952  | GDSSYKNIH      | macrophage colony stimulating factor 1 receptor | 0,748886477 | 0,132222952 |    |
| 953  | RKRLSQDAY      | Neutrophil cytosol factor 6                     | 0,603216241 | 0,118254286 |    |
| 954  | ASGSFKL        | Histone H1.1                                    | 0,847798231 | 0,125800803 |    |
| 955  | LRRGSLG        | pyruvate kinase                                 | 1,650797076 | 0,29586954  |    |
| 956  | RRSVSEAAL      | hormone sensitive lipase                        | 0,728051112 | 0,094548538 |    |
| 957  | SLAMSPRQR      | Protein phosphatase inhibitor 5                 | 1,147780143 | 0,323244328 |    |
| 958  | RRASLG         |                                                 | 1,747470636 | 0,223341417 | On |
| 959  | AAVDTSEI       | Prothymosin                                     | 1,167106246 | 0,202573658 |    |
| 960  | TESQSLTLT      | Beta casein                                     | 0,684169159 | 0,065646872 |    |
| 961  | TTRVTPLRT      | Desmin                                          | 1,939496066 | 0,36690275  | On |
| 962  | WTADSGEGD      | Fibrinogen alpha                                | 1,539652797 | 0,204929694 | On |
| 963  | RHRDTGILD      | Myelin basic protein                            | 0,776913976 | 0,131456405 |    |
| 964  | NRIYTHQVV      | cell division protein kinase 7                  | 1,827986079 | 0,295477418 | On |
| 965  | LRKASLG        | pyruvate kinase                                 | 1,30610722  | 0,128649943 | On |
| 966  | YHGHSMSDP      | pyruvate dehydrogenase E1                       | 0,710661937 | 0,146002106 |    |
| 967  | SSEESIISQ      | Alpha-S2 casein                                 | 0,933542565 | 0,10045114  |    |
| 968  | PKRGSKGKD      | Myelin basic protein                            | 0,921716689 | 0,208007669 |    |
| 969  | LGSALRRR       | vimentin                                        | 6,317415894 | 0,981352136 | On |
| 970  | TDESDNEI       | lower matrix phosphoprotein                     | 1,797062693 | 0,150562618 | On |
| 971  | TRSVSSSSY      | vimentin                                        | 1,362815071 | 0,217012207 |    |
| 972  | PPRRSSIRN      | Neutrophil cytosol factor 7                     | 5,519754221 | 1,900095905 | On |
| 973  | RTKGSQSV       | phosphorylase b kinase beta                     | 2,419444582 | 0,260292429 | On |
| 974  | KRAASPRKS      | Histone H5                                      | 3,339278851 | 0,583421675 | On |
| 975  | LMAPSEEDH      | insulin-like growth factor binding protein 2    | 0,848297424 | 0,18798318  |    |
| 976  | QNPVYHNQP      | EGF Receptor                                    | 1,105521585 | 0,042044079 | On |
| 977  | SRSRSRSPG      | Lamin B receptor                                | 5,670772536 | 1,251579772 | On |
| 978  | KRKVSSAEG      | Nonhistone chromosomal protein HMG-14           | 1,897172464 | 0,259549874 | On |
| 979  | LQDDYEDMM      | Band 3 anion transport protein                  | 1,953732625 | 0,501212771 |    |
| 980  | QRRSSEGST      | Volt.-dep. L-type calcium channel alpha-1S      | 0,763139701 | 0,086092942 |    |
| 981  | GVLRRASVA      | pyruvate kinase                                 | 1,789488644 | 0,185400547 | On |
| 982  | KRPSLRAKA      | Myelin basic protein                            | 2,632998315 | 0,333673898 | On |
| 983  | EASTTVSKT      | Rhodopsin                                       | 0,991900443 | 0,183534784 |    |
| 984  | ELSNYIAMG      | Insulin receptor substrate 9                    | 0,695377666 | 0,086884846 |    |
| 985  | HHHATPSPP      | Myb proto-oncogene protein                      | 0,700480681 | 0,146520044 |    |
| 986  | KTETSQVAP      | Rhodopsin                                       | 0,590455481 | 0,063168585 |    |
| 987  | PYKFPSSPLRIPGZ |                                                 | 0,666989724 | 0,129625837 |    |
| 988  | GGSVTKKRK      | Lamin C                                         | 2,696976455 | 1,332276493 |    |
| 989  | AKRISGKMA      | cell division control protein 2                 | 1,731470389 | 0,263421361 | On |
| 990  | DDPSYVNVQ      | Adaptor molecule SHC                            | 1,036693103 | 0,235672856 |    |
| 991  | EVEKSPVKS      | neurofilament triplet M                         | 0,846333589 | 0,106094571 |    |
| 992  | GKSSSYSKQ      | Fibrinogen alpha                                | 1,550185328 | 0,365002414 |    |
| 993  | DSRSSLIRK      | multidrug resistance protein 3                  | 1,557098636 | 0,118806337 | On |
| 994  | EKAKSPVPK      | neurofilament triplet M                         | 1,142253629 | 0,174377043 |    |
| 995  | RQRKSRTTI      | Interleukin-2 receptor alpha                    | 3,011546868 | 1,131091312 |    |
| 996  | SAYATVKAY      | Annexin II                                      | 0,962713607 | 0,111290368 |    |
| 997  | NTDGSTDYG      | Lysozyme C                                      | 2,101285153 | 0,951489924 |    |
| 998  | KRTRLR         | EGF Receptor                                    | 2,698150029 | 0,526038874 | On |
| 999  | AGPTSARDG      | RNA polymerase alpha                            | 0,843227514 | 0,033038937 |    |
| 1000 | DAPDPELL       | Tyrosine-protein kinase Dash/Abl                | 0,874068208 | 0,181024401 |    |
| 1001 | ESSYSYEEI      | RNA polymerase alpha                            | 1,964451237 | 0,771590861 |    |
| 1002 | YSLGSALRP      | vimentin                                        | 1,100066415 | 0,050772922 |    |
| 1003 | SPHQSEDEE      | Glycogen [starch] synthase                      | 0,848544475 | 0,148698488 |    |
| 1004 | RKRRAE         | Histone H2B                                     | 1,641303826 | 0,091595446 | On |
| 1005 | RNASTNDSP      | Beta-2 adrenergic receptor                      | 0,761720618 | 0,156042449 |    |
| 1006 | SAELYSNAL      | platelet-derived growth factor receptor         | 1,026432179 | 0,364114409 |    |
| 1007 | NRQLSSGVS      | Heat Shock Protein 28                           | 0,914994083 | 0,200724953 |    |

|      |                |                                                           |             |             |    |
|------|----------------|-----------------------------------------------------------|-------------|-------------|----|
| 1008 | VGPDS          | p53                                                       | 0,812587405 | 0,201720736 |    |
| 1009 | SSSESGAPE      | Clathrin light chain B                                    | 0,86138284  | 0,106898688 |    |
| 1010 | TKHIYSNLA      | Mast/stem cell growth factor receptor                     | 0,834914464 | 0,13283175  |    |
| 1011 | VDEMYREAP      | Myosin regulatory light chain 4                           | 0,854947644 | 0,236694227 |    |
| 1012 | YRKGLSKSR      | spermatid nuclear transition protein 1                    | 1,375043731 | 0,317565338 |    |
| 1013 | SNQEYLDLS      | Receptor tyrosine kinase                                  | 1,334647128 | 0,56708231  |    |
| 1014 | RKISASE        | cGMP-specific phosphodiesterase 3a                        | 0,927662519 | 0,183486572 |    |
| 1015 | VGFMTYVA       | mitogen-activated protein kinase 1                        | 1,111022024 | 0,307602035 |    |
| 1016 | QTASSPLSP      | Lamin                                                     | 0,879196513 | 0,126426417 |    |
| 1017 | LRKVKQEE       | vasodilator-stimulated phosphoprotein                     | 1,164706544 | 0,267174081 |    |
| 1018 | PQRATSNVF      | Myosin regulatory light chain 6                           | 0,845072273 | 0,163087359 |    |
| 1019 | SSNDSTSVS      | muscarinic acetylcholine receptor M2                      | 0,988613207 | 0,379756518 |    |
| 1020 | THVASVSDV      | acetyl-CoA carboxylase                                    | 0,99868955  | 0,061532052 |    |
| 1021 | LRLSTKYR       | protein-tyrosine phosphatase G1                           | 3,192718029 | 0,652557556 | On |
| 1022 | PRRDSTEGF      | fructose-1,6-bisphosphatase                               | 1,364649762 | 0,327354317 |    |
| 1023 | KAEEYILKK      | Acetylcholine receptor protein gamma                      | 1,036603124 | 0,162013999 |    |
| 1024 | KRPSFRAKA      | Myelin basic protein                                      | 3,773060653 | 0,470310409 | On |
| 1025 | PTSPASPQPKG    | Tyrosine 3-monooxygenase                                  | 0,972673317 | 0,179709874 |    |
| 1026 | QRYSSDPTG      | EGF Receptor                                              | 0,830882961 | 0,266252046 |    |
| 1027 | KEDTYTAHA      | Tyrosine-protein kinase abl-1                             | 0,84559638  | 0,231211967 |    |
| 1028 | KRRLSFSET      | Interleukin-1 alpha                                       | 2,044933974 | 0,37193874  | On |
| 1029 | KRAKAKTTKRR    | Myosin regulatory light chain 2                           | 6,890940233 | 1,420347663 | On |
| 1030 | HRQETVDAL      | calcium/calmodulin-dependent protein kinase type II alpha | 0,540242862 | 0,028992144 |    |
| 1031 | LNRMSFASN      | acetyl-CoA carboxylase                                    | 0,732118574 | 0,104065714 |    |
| 1032 | EEDTYTMPS      | Focal adhesion kinase                                     | 1,690406666 | 0,89738572  |    |
| 1033 | EQEYEDPD       | Band 3 anion transport protein                            | 1,028492511 | 0,301686636 |    |
| 1034 | HVSSSEESI      | Alpha-S2 casein                                           | 0,746675603 | 0,200997141 |    |
| 1035 | METPSQRRRA     | Lamin C                                                   | 1,304140464 | 0,479134869 |    |
| 1036 | PYKFPSSPLRIPGZ |                                                           | 0,769198926 | 0,222165885 |    |
| 1037 | GNFNYVEFT      | Myosin regulatory light chain 2                           | 1,371620765 | 0,388810469 |    |
| 1038 | APRTPGGRR      | Myelin basic protein                                      | 3,615256688 | 1,314464271 |    |
| 1039 | DGNGYISAA      | Calmodulin                                                | 1,018148373 | 0,065995104 |    |
| 1040 | FLTEYVATR      | extracellular signal-regulated kinase 2                   | 0,735629927 | 0,125892585 |    |
| 1041 | GRALSTRAQ      | Troponin I                                                | 1,844615785 | 0,502532097 |    |
| 1042 | EDRMSLVNS      | Cystatin S                                                | 0,600087965 | 0,171592277 |    |
| 1043 | ENPEYLGLD      | Receptor tyrosine-protein kinase erbB-2                   | 1,221427948 | 0,746103863 |    |
| 1044 | RRLSSLRAS      | 40S ribosomal protein S6                                  | 2,844306393 | 0,740585133 | On |
| 1045 | SFKKSFKLS      | myristolated alanine-rich C-kinase substrate (MARCKS)     | 3,056801961 | 0,529926832 | On |
| 1046 | PSKKYAIKG      | Glutamyl aminopeptidase                                   | 0,982878687 | 0,319334139 |    |
| 1047 | RRPSV          | pyruvate kinase                                           | 1,379087119 | 0,23602889  |    |
| 1048 | APETPGGRR      | Myelin basic protein                                      | 1,516002745 | 0,281036039 |    |
| 1049 | DEEMSETAD      | Protein phosphatase inhibitor 2                           | 0,779429499 | 0,110377541 |    |
| 1050 | FFSSSESGA      | Clathrin light chain B                                    | 0,803095595 | 0,0639998   |    |
| 1051 | RDDTYTAHA      | Tyrosine-protein kinase Dash/Abl                          | 0,803227284 | 0,177620658 |    |
| 1052 | APTPGGRR       | Myelin basic protein                                      | 2,670325906 | 1,190910285 |    |
| 1053 | STNDSPL        | Beta-2 adrenergic receptor                                | 0,872078924 | 0,243918738 |    |
| 1054 | RRKASGPPV      | Histone H1.1                                              | 1,358708351 | 0,071111045 | On |
| 1055 | SEENSKKTV      | Alpha-S2 casein                                           | 0,663951451 | 0,088326447 |    |
| 1056 | PASPSPQRQ      | synapsins IA and IB                                       | 0,843003152 | 0,104623002 |    |
| 1057 | RRASR          | pyruvate kinase                                           | 2,939523988 | 0,714611467 | On |
| 1058 | STNEYMDMK      | Mast/stem cell growth factor receptor                     | 0,859582727 | 0,251084271 |    |
| 1059 | TPPLSPIDM      | Transcription factor AP-5                                 | 0,791635504 | 0,187188499 |    |
| 1060 | VKGATSDEE      | DNA topoisomerase II                                      | 0,853512194 | 0,082398186 |    |
| 1061 | QRATSNVFA      | Myosin regulatory light chain 5                           | 0,821130307 | 0,152069714 |    |
| 1062 | SPRKSPRKS      | Histone H6                                                | 3,187145112 | 0,865878722 | On |
| 1063 | RRRASVA        | pyruvate kinase                                           | 2,527673595 | 0,622085497 | On |

|      |                |                                                         |             |             |    |
|------|----------------|---------------------------------------------------------|-------------|-------------|----|
| 1064 | VTPSPPLGP      | casein kinase II                                        | 0,91162353  | 0,08702448  |    |
| 1065 | SRKDSLDDDS     | alpha-1B adrenergic receptor                            | 1,242219814 | 0,363331691 |    |
| 1066 | LSEHSSPEE      | Dopamine- and cAMP-regulated neuronal phosphoprotein    | 0,908207046 | 0,365680803 |    |
| 1067 | PSPKYPGPQ      | Chromogranin A                                          | 0,745286371 | 0,231254342 |    |
| 1068 | SSVLYTAVQ      | platelet-derived growth factor receptor                 | 0,738310542 | 0,087497266 |    |
| 1069 | TLSDSDDDED     | N-myc proto-oncogene protein                            | 1,44171557  | 0,250886018 |    |
| 1070 | LSLDSQGRN      | Beta-2 adrenergic receptor                              | 0,713331908 | 0,176692108 |    |
| 1071 | PTKRSPQKG      | Histone H2B.1                                           | 0,773396424 | 0,137772256 |    |
| 1072 | KIQASFRGH      | neurogranin                                             | 3,20281029  | 0,51897919  | On |
| 1073 | KRSNSVDTS      | Glycogen [starch] synthase                              | 1,266506961 | 0,362316917 |    |
| 1074 | KRKQISGRGL     | Glycogen phosphorylase                                  | 1,145066836 | 0,377472003 |    |
| 1075 | SQESSEEEQ      | high mobility group protein                             | 0,923640681 | 0,224775323 |    |
| 1076 | KKDVTVPKA      | Histone H1                                              | 2,000885681 | 0,561579019 |    |
| 1077 | KSRWSGSQQ      | RAF proto-oncogene ser/thr-protein kinase               | 1,644955793 | 0,437039231 |    |
| 1078 | LYSGSEGDS      | Serum response factor                                   | 1,217316958 | 0,374944909 |    |
| 1079 | IGHHSTSD       | 2-oxoisovalerate dehydrogenase alpha                    | 0,695566493 | 0,352015769 |    |
| 1080 | MPGETPPLS      | Transcription factor AP-3                               | 0,793443947 | 0,245898049 |    |
| 1081 | EETVYEAEP      | Hematopoietic cell-specific LYN substrate               | 2,510762868 | 1,72052535  |    |
| 1082 | ERRNSILTE      | cystic fibrosis transmembrane conductance regulator     | 0,933117689 | 0,277936694 |    |
| 1083 | INETSQHHD      | vimentin                                                | 0,613203429 | 0,111811694 |    |
| 1084 | NDSNYVVKG      | Mast/stem cell growth factor receptor                   | 0,669727139 | 0,103189414 |    |
| 1085 | PYKFPSSPLRIPGZ |                                                         | 0,569605096 | 0,084898525 |    |
| 1086 | GRNASTNDS      | Beta-2 adrenergic receptor                              | 0,595284536 | 0,030341818 |    |
| 1087 | ARSGSSTYS      | parathyroid hormone/parathyroid hormone-related peptide | 1,144323971 | 0,188077043 |    |
| 1088 | DLTSPDVG       | Transcription factor AP-4                               | 0,911999943 | 0,129740887 |    |
| 1089 | GAGNSLRTA      | Lamin C                                                 | 1,001494359 | 0,151678629 |    |
| 1090 | GRTWTLAGT      | cGMP-dependent protein kinase (PKG)                     | 0,7634596   | 0,123012405 |    |
| 1091 | EEHVYSFPN      | Paxillin                                                | 0,742440683 | 0,055128384 |    |
| 1092 | ERHHSIDAQ      | phosphoenolpyruvate carboxylase                         | 0,871891036 | 0,172655423 |    |
| 1093 | RRRRAASVA      | pyruvate kinase                                         | 3,585567358 | 1,709536948 |    |
| 1094 | SIRDTPAKN      | Nucleophosmin                                           | 0,733130198 | 0,079772765 |    |
| 1095 | GGYSLG         | Lysozyme C                                              | 0,86850494  | 0,122215863 |    |
| 1096 | AAASFKAKK      |                                                         | 1,8551208   | 0,25848721  | On |
| 1097 | ARDIYKNDY      | Ros proto-oncogene tyrosine kinase                      | 1,07090494  | 0,389406721 |    |
| 1098 | DKEVSDDEA      | HSP90-alpha                                             | 1,055432018 | 0,347042035 |    |
| 1099 | FRKFTKSER      | cGMP-dependent protein kinase (PKG)                     | 2,610126432 | 0,569491205 | On |
| 1100 | RFFGSDRGA      | Myelin basic protein                                    | 1,192766993 | 0,141724839 |    |
| 1101 | PRTPGGRR       | Myelin basic protein                                    | 1,221755498 | 0,44489575  |    |
| 1102 | KRRVSEV        | Erythrodihydroneopterin triphosphate synthetase         | 1,397206125 | 0,510729643 |    |
| 1103 | RRRGSSIPQ      | 6-phosphofructo-2-kinase/fructose-2,6-bisphosphatase    | 1,519974418 | 0,325390091 |    |
| 1104 | SGDTPRHL       | Microtubule-associated protein tau                      | 0,824955902 | 0,139810709 |    |
| 1105 | KQITVR         | Glycogen phosphorylase                                  | 1,764638632 | 0,362536341 |    |
| 1106 | SSKRA          | Myosin regulatory light chain 2                         | 2,164636838 | 0,340635852 | On |
| 1107 | SVSSSSYRR      | vimentin                                                | 3,611718666 | 0,256231988 | On |
| 1108 | TRQASISGP      | synapsins                                               | 1,010687679 | 0,244695301 |    |
| 1109 | VRTYTHEVV      | Cell division protein kinase 2                          | 0,876783417 | 0,1072308   |    |
| 1110 | REILSRRPS      | cAMP response element binding protein                   | 2,627528724 | 0,657419911 | On |
| 1111 | GASGSFKL       | Histone H1.1                                            | 0,948394743 | 0,166485794 |    |
| 1112 | VRRSDRA        | Troponin I                                              | 1,250461271 | 0,299619837 |    |
| 1113 | VTRRTLSDM      | 6-phosphofructokinase                                   | 1,273714163 | 0,182231596 |    |
| 1114 | SRRGSESE       | phosphoprotein phosphatase 1, 3a                        | 1,202590059 | 0,161118518 |    |
| 1115 | PASAYGSVK      | Annexin II                                              | 0,958772044 | 0,20242825  |    |
| 1116 | PWQVSLRTR      | Plasminogen                                             | 1,065399688 | 0,338040832 |    |
| 1117 | STSRSLYSS      | vimentin                                                | 2,070693933 | 0,699930971 |    |
| 1118 | TRGGSLERS      | alpha-1B adrenergic receptor                            | 0,982697356 | 0,242855913 |    |
| 1119 | PFKLSGLSF      | MARCKS-related protein                                  | 0,788606488 | 0,139715243 |    |

|      |                |                                                       |             |             |    |
|------|----------------|-------------------------------------------------------|-------------|-------------|----|
| 1120 | QEQEYVQAV      | Annexin I                                             | 0,912736668 | 0,213897171 |    |
| 1121 | KKRFSFKKS      | myristolated alanine-rich C-kinase substrate (MARCKS) | 5,803689526 | 1,530529151 | On |
| 1122 | KYLASASTM      | Myelin basic protein                                  | 1,403338355 | 0,180333155 |    |
| 1123 | PRRVSRRRR      | Protamine YII                                         | 1,242330569 | 0,371292692 |    |
| 1124 | SRKRSGEAT      | 6-phosphofructokinase                                 | 0,933275334 | 0,180687371 |    |
| 1125 | KMKDSDSEE      | Calmodulin                                            | 0,813636388 | 0,090381883 |    |
| 1126 | LFRLSEHSS      | Dopamine- and cAMP-regulated neuronal phosphoprotein  | 0,710074007 | 0,140370238 |    |
| 1127 | QDENTVSTS      | muscarinic acetylcholine receptor M2                  | 0,850609755 | 0,093516635 |    |
| 1128 | ISITSRKAQ      | GTP-binding protein era                               | 0,958823045 | 0,222238775 |    |
| 1129 | NFLKTSAGS      | Carbon catabolite derepressing protein kinase         | 0,816734355 | 0,24714066  |    |
| 1130 | EHIPYTHMN      | Insulin Receptor (IR)                                 | 1,080894741 | 0,239788182 |    |
| 1131 | ESMESYELN      | Matrix Gla-protein                                    | 2,373830406 | 0,269921103 | On |
| 1132 | KKRFSFKKS      | myristolated alanine-rich C-kinase substrate (MARCKS) | 5,544407459 | 0,482610468 | On |
| 1133 | NKQGYKARQ      | Protein kinase C delta                                | 1,676784657 | 0,315979017 |    |
| 1134 | PYKFPSSPLRIPGZ |                                                       | 0,913247716 | 0,176078125 |    |
| 1135 | GSQTSSRPS      | vimentin                                              | 0,919212654 | 0,179201589 |    |
| 1136 | AVMVSHYIH      | Prolactin                                             | 1,677499089 | 0,459122727 |    |
| 1137 | DPPGTESFV      | Beta-2 adrenergic receptor                            | 1,592483982 | 0,272570938 |    |
| 1138 | GFKRSYEEH      | Insulin Receptor (IR)                                 | 1,256370038 | 0,206873937 |    |
| 1139 | GSRRRRRRY      | protamine                                             | 3,744794608 | 1,406673978 |    |
| 1140 | EFPLSPPKK      | stathmin                                              | 1,242478022 | 0,156617147 |    |
| 1141 | ESEKTKTKE      | myosin II heavy chain                                 | 1,010563222 | 0,193442317 |    |
| 1142 | RSSMSGLHL      | acetyl-CoA carboxylase                                | 1,040199467 | 0,017123412 | On |
| 1143 | SLVNSRAQE      | Cystatin S                                            | 0,889900678 | 0,186947169 |    |
| 1144 | RRATVA         | pyruvate kinase                                       | 1,906171582 | 0,222144249 | On |
| 1145 | ADSFSLHDA      | galectin-3                                            | 1,185493121 | 0,096233544 |    |
| 1146 | ATRRSYVSS      | glial fibrillary acidic protein                       | 2,058413871 | 0,598350218 |    |
| 1147 | DNIDSQGRN      | Beta-2 adrenergic receptor                            | 1,25040986  | 0,398634384 |    |
| 1148 | GDSSEGEIE      | Serum response factor                                 | 1,269778682 | 0,264796064 |    |
| 1149 | RKRKSSQAL      | Thyroid hormone receptor alpha                        | 1,798505153 | 0,171753003 | On |
| 1150 | AKRSRKE        | Histone H2B                                           | 1,54454976  | 0,334264572 |    |
| 1151 | LRRATLG        | pyruvate kinase                                       | 1,855318736 | 0,20644686  | On |
| 1152 | RRSSVGYI       | Acetylcholine receptor protein delta                  | 2,131874478 | 0,219853918 | On |
| 1153 | SKVTSKAGS      |                                                       | 1,471957345 | 0,110950675 | On |
| 1154 | RGYSLG         | Lysozyme C                                            | 1,492922762 | 0,088464094 | On |
| 1155 | AARTPGGRR      | Myelin basic protein                                  | 2,837757861 | 0,962417156 |    |
| 1156 | TEPQYQGE       | Proto-oncogene tyrosine-protein kinase Fyn            | 1,105529039 | 0,136176226 |    |
| 1157 | TTRRSASKT      | Fibrinogen alpha                                      | 2,063899256 | 0,058783502 | On |
| 1158 | WLTKTPEGN      | Actin and myosin binding protein                      | 0,972944683 | 0,087331365 |    |
| 1159 | RGRSSVYSA      | myosin heavy chain                                    | 2,265218048 | 1,732208592 |    |
| 1160 | RKRTLRRRL      | EGF Receptor                                          | 2,961119369 | 0,524300455 | On |
| 1161 | LRHASLG        | pyruvate kinase                                       | 1,115523393 | 0,201339427 |    |
| 1162 | YNGYSSNS       | Beta-2 adrenergic receptor                            | 1,19149433  | 0,073981799 | On |
| 1163 | SRTPSLPTP      | Microtubule-associated protein tau                    | 0,882042303 | 0,109215265 |    |
| 1164 | PKKGSKKAV      | Histone H2B                                           | 1,051896869 | 0,186974668 |    |
| 1165 | LELSDDDD       | Myosin heavy chain, nonmuscle type B                  | 1,268697405 | 0,197412623 |    |
| 1166 | TDDGYMPMS      | Insulin receptor substrate 10                         | 1,145849921 | 0,31682069  |    |
| 1167 | TRRLTGFLP      | Glycogen phosphorylase                                | 1,526752728 | 0,355981221 |    |
| 1168 | PPEKTEEEE      | somatostatin receptor type 5                          | 1,272064302 | 0,24985767  |    |
| 1169 | RTGRSGSV       | phosphorylase b kinase beta                           | 2,477373112 | 0,457876922 | On |
| 1170 | KQSPSSSPT      | phosphorylcholine transferase                         | 1,007362028 | 0,204046428 |    |
| 1171 | LLRPSRRVR      | somatostatin receptor type 6                          | 3,444817483 | 1,197428536 |    |
| 1172 | QMALTPVVV      | cell division protein kinase 4                        | 0,999429095 | 0,143783977 |    |
| 1173 | SRSRSPGRP      | Lamin B receptor                                      | 2,865055932 | 0,745259403 | On |
| 1174 | KRKRSRKES      | Histone H2B                                           | 4,437627203 | 0,415431899 | On |
| 1175 | LQAISPKQS      | phosphorylcholine transferase                         | 1,359097082 | 0,072777462 | On |

|      |           |                                            |             |            |  |
|------|-----------|--------------------------------------------|-------------|------------|--|
| 1176 | QRRRSLEPP | Proto-oncogene tyrosine-protein kinase Src | 1,001442111 | 0,18869125 |  |
|------|-----------|--------------------------------------------|-------------|------------|--|



**Suppl. Table 5. Average densitometry values for all substrates on the arrays for myeloid cells and their Markov test of significance.**

| Peptide # | Sequence       | Source protein                                          | $\sum(x_1, x_2, \dots, x_9)/n$ | $\sigma(x_1, x_2, \dots, x_9)$ | Markov state |
|-----------|----------------|---------------------------------------------------------|--------------------------------|--------------------------------|--------------|
| 1         | HEYIYVDP       | platelet-derived growth factor receptor                 | 1,086394832                    | 0,199844328                    |              |
| 2         | KRPSVRAKA      | Myelin basic protein                                    | 2,528348233                    | 1,003732966                    |              |
| 3         | EDNEYTARQ      | Tyrosine-protein kinase transforming protein SRC        | 1,219013529                    | 0,180309565                    |              |
| 4         | ENKLYGMDS      | Probable receptor with tyrosine-protein kinase activity | 0,695675431                    | 0,109131835                    |              |
| 5         | HRLLTLDPV      | Interleukin-1 receptor                                  | 0,673995231                    | 0,130854605                    |              |
| 6         | LEKKYVRRD      | macrophage colony stimulating factor 1 receptor         | 0,66436318                     | 0,054876933                    |              |
| 7         | PYKFPSSPLRIPGZ |                                                         | 0,657043556                    | 0,119989606                    |              |
| 8         | GKRQTEREK      | Troponin T                                              | 0,818980866                    | 0,172026044                    |              |
| 9         | APATSPKAE      | neuromodulin (GAP43)                                    | 0,784827761                    | 0,129492239                    |              |
| 10        | DEESEQGA       | tubulin                                                 | 1,057643857                    | 0,045224821                    |              |
| 11        | FFRRSKIIV      | glutamate receptor 2                                    | 1,114088387                    | 0,09395775                     |              |
| 12        | GMTEYVATR      | Mitogen-activated protein kinase FUS3                   | 0,815493723                    | 0,043953101                    |              |
| 13        | EAALYKNLL      | Mast/stem cell growth factor receptor                   | 0,801505514                    | 0,121076407                    |              |
| 14        | ELILSPRSK      | stathmin                                                | 1,023838444                    | 0,236509162                    |              |
| 15        | RRAVSEQDA      | Tyrosine 3-monooxygenase                                | 0,566194274                    | 0,102226535                    |              |
| 16        | SEDNSEDEI      | acetyl-CoA carboxylase                                  | 1,381028611                    | 0,267816574                    |              |
| 17        | PASLSRAKA      | phosphorylcholine transferase                           | 1,045761678                    | 0,170135004                    |              |
| 18        | RRASL          | pyruvate kinase                                         | 2,076785803                    | 0,40385131                     |              |
| 19        | AKKMSTYNV      | myosin heavy chain                                      | 1,307877509                    | 0,371260144                    |              |
| 20        | DDINSYEA       | Coagulation factor IX                                   | 1,566628907                    | 0,263490925                    |              |
| 21        | ETRFTDTRK      | elongation factor 2                                     | 1,06979344                     | 0,286791979                    |              |
| 22        | QLSTSEENS      | Alpha-S2 casein                                         | 0,64714865                     | 0,10315831                     |              |
| 23        | SPRKSPKKS      | Histone H1                                              | 1,451743258                    | 0,458018049                    |              |
| 24        | RRKASGP        | Histone H1.1                                            | 1,184704153                    | 0,387236542                    |              |
| 25        | RQLRSPRRT      | ras-related protein Rab-4A                              | 2,15993043                     | 1,004245548                    |              |
| 26        | SAVASNMRD      | muscarinic acetylcholine receptor M2                    | 0,857147488                    | 0,102622163                    |              |
| 27        | RTPPPSG        | Myelin basic protein                                    | 0,797085089                    | 0,049642052                    |              |
| 28        | LRRAS          | Red cell/liver pyruvate kinase                          | 1,308003775                    | 0,419169496                    |              |
| 29        | SSTGSIDMV      | Microtubule-associated protein tau                      | 0,802814952                    | 0,18655223                     |              |
| 30        | TLASSFKRR      | glutamate (NMDA) receptor subunit zeta 1                | 2,716088555                    | 0,929424782                    |              |
| 31        | VGAFSTVKG      | rhodopsin kinase                                        | 1,046001866                    | 0,211283656                    |              |
| 32        | YSGHMSMDP      | pyruvate dehydrogenase E1                               | 0,694566046                    | 0,079603513                    |              |
| 33        | SPGEYVNI       | Insulin receptor substrate 1                            | 1,001298821                    | 0,189941264                    |              |
| 34        | RKRSAKE        | Histone H2B                                             | 1,362260256                    | 0,462402801                    |              |
| 35        | VINETSQHH      | vimentin                                                | 0,722758014                    | 0,005807274                    |              |
| 36        | SPVVSQDTS      | Microtubule-associated protein tau                      | 0,71482191                     | 0,117083986                    |              |
| 37        | LRRFSLATM      | Cytochrome P450 2B1                                     | 2,193542045                    | 0,508134007                    | On           |
| 38        | PRPASVPPS      | Glycogen [starch] synthase                              | 0,870159144                    | 0,08437671                     |              |
| 39        | SSRPSSNRS      | vimentin                                                | 1,579275745                    | 0,633516823                    |              |
| 40        | TKFASDDEH      | Lupus La protein                                        | 0,784897379                    | 0,098692465                    |              |
| 41        | LSDDSFIED      | DNA topoisomerase II                                    | 1,645368371                    | 0,331759467                    |              |
| 42        | PSPKTPPGS      | Microtubule-associated protein tau                      | 0,834384725                    | 0,089901913                    |              |
| 43        | KDIGSESTE      | Alpha-S1 casein                                         | 1,069782836                    | 0,357532516                    |              |
| 44        | KRRGSVPIL      | erythrocyte protein 4.2                                 | 2,300693507                    | 0,650758191                    |              |
| 45        | KRAKAKAKKR     | Myosin regulatory light chain 2                         | 3,206296215                    | 1,380184519                    |              |
| 46        | QSYSSQRV       | Desmin                                                  | 0,886591118                    | 0,04102607                     |              |
| 47        | KGTGYIKTE      | Signal Transducer and Activator of Transcription 1      | 1,095954746                    | 0,215445351                    |              |
| 48        | KRSLSEMEI      | Serum response factor                                   | 0,867052102                    | 0,126696356                    |              |
| 49        | KRKQGSVRGL     | Glycogen phosphorylase                                  | 2,482705484                    | 0,617884883                    | On           |
| 50        | HTRDSEAQR      | erythrocyte band 7                                      | 0,716662154                    | 0,100088414                    |              |
| 51        | MAEVSWKVL      | Phosphorylase b kinase beta                             | 0,807678127                    | 0,04008105                     |              |
| 52        | EEGISQESS      | high mobility group protein                             | 0,694875533                    | 0,278064346                    |              |
| 53        | EQQQTEDEL      | Beta casein                                             | 0,70022942                     | 0,273895933                    |              |
| 54        | IGEGTYGVV      | Cell division protein kinase 2                          | 0,780324312                    | 0,338406002                    |              |
| 55        | MMPYVVVTR      | Stress-activated protein kinase JNK1                    | 1,018105953                    | 0,123876152                    |              |

|     |                |                                                         |             |             |    |
|-----|----------------|---------------------------------------------------------|-------------|-------------|----|
| 56  | PYKFPSSPLRIPGZ |                                                         | 0,622069815 | 0,191281998 |    |
| 57  | GQEVYVKKT      | PTK receptor for angiotensin 1 (TEK)                    | 0,92205071  | 0,089248482 |    |
| 58  | AQETSGEEI      | insulin-like growth factor binding protein 1            | 0,7667786   | 0,075313842 |    |
| 59  | DKAKSRPSL      | fructose-1,6-bisphosphatase                             | 1,145792934 | 0,173806044 |    |
| 60  | FPVSYSSSG      | Probable receptor with tyrosine-protein kinase activity | 0,748112025 | 0,250796538 |    |
| 61  | GRLSSMAMI      | myosin light chain kinase                               | 1,142786819 | 0,300002264 |    |
| 62  | EEDLSDENI      | transcription factor BAF1                               | 0,869829772 | 0,300265395 |    |
| 63  | EPGPYAQPS      | Proto-oncogene C-crk                                    | 0,697599561 | 0,164604037 |    |
| 64  | RRRASQLKV      | Gamma-aminobutyric-acid receptor beta                   | 1,070292213 | 0,227571862 |    |
| 65  | SGADYPDEL      | Trypsin I                                               | 1,509982983 | 0,460848191 |    |
| 66  | KQISVR         | Glycogen phosphorylase                                  | 1,792250598 | 0,731550461 |    |
| 67  | SLKDH          | L-lactate dehydrogenase M                               | 0,647198314 | 0,173821415 |    |
| 68  | APRTAGGRR      | Myelin basic protein                                    | 1,914444986 | 1,01641643  |    |
| 69  | DGHEYIYVD      | platelet-derived growth factor receptor                 | 1,145686783 | 0,19722827  |    |
| 70  | FKRSYEEHI      | Insulin Receptor (IR)                                   | 0,750717525 | 0,104956316 |    |
| 71  | REARSRAST      | cAMP-dependent protein kinase II (PKA)                  | 1,460470378 | 0,41773525  |    |
| 72  | DRVYVHPF       | Angiotensinogen                                         | 0,846239395 | 0,024241026 |    |
| 73  | VRRSDAA        | Troponin I                                              | 0,878541213 | 0,099985496 |    |
| 74  | RRKMSRGLP      | Volt.-dep. L-type calcium channel alpha-1S              | 1,320553521 | 0,539327269 |    |
| 75  | SEVPYREVQ      | Tyrosine-protein kinase Src64B (hom MAP3K10)            | 0,78478514  | 0,220085943 |    |
| 76  | PRRASATSS      | Glycogen [starch] synthase                              | 1,184027754 | 0,235360725 |    |
| 77  | RRLSI          | phosphorylase b kinase alpha                            | 2,455805281 | 0,79920927  |    |
| 78  | STLSLSPFYL     | Alpha crystallin B                                      | 0,994467718 | 0,128673811 |    |
| 79  | TRDIYETDY      | Insulin Receptor (IR)                                   | 2,039447624 | 0,715910005 |    |
| 80  | VPTLSTFRT      | Desmin                                                  | 1,206229871 | 0,176020373 |    |
| 81  | RASTSKSES      | 40S ribosomal protein S6                                | 0,739585538 | 0,061841757 |    |
| 82  | SPSSSPTHE      | phosphorylcholine transferase                           | 0,634526526 | 0,259047416 |    |
| 83  | STNDSL         | Beta-2 adrenergic receptor                              | 1,108638253 | 0,269214667 |    |
| 84  | VRTFTHEVV      | Cell division protein kinase 2                          | 1,024865305 | 0,067396161 |    |
| 85  | SRKMSVQEY      | phosducin                                               | 0,960557928 | 0,170116176 |    |
| 86  | LSGLSFKRN      | MARCKS-related protein                                  | 1,463822792 | 0,118238703 | On |
| 87  | PTGTPQQRK      | Kinesin-related motor protein Eg5                       | 0,857251483 | 0,048457054 |    |
| 88  | STLASSFKR      | glutamate (NMDA) receptor subunit zeta 2                | 2,200056806 | 0,947107719 |    |
| 89  | TPPKSPSSA      | Microtubule-associated protein tau                      | 0,639303789 | 0,172938866 |    |
| 90  | PAAVSEHGD      | Na+/K+ ATPase 1                                         | 0,69807088  | 0,195063567 |    |
| 91  | PVSPSLVQG      | muscarinic acetylcholine receptor M2                    | 0,683267714 | 0,146915236 |    |
| 92  | KKDASDDLD      | eukaryotic translation initiation factor 2 beta         | 0,834967308 | 0,097009062 |    |
| 93  | KSRPSLPLP      | fructose-1,6-bisphosphatase                             | 1,348076418 | 0,35689336  |    |
| 94  | LSVSSLPGL      | Glycogen [starch] synthase                              | 0,87274575  | 0,115065074 |    |
| 95  | SRHSSPHQS      | Glycogen [starch] synthase                              | 0,994575728 | 0,116329972 |    |
| 96  | KKPPTPPPE      | Large T antigen                                         | 0,779905341 | 0,182620957 |    |
| 97  | KVPQTPLHT      | MAP kinase-activated protein kinase 2                   | 1,393881269 | 0,471547976 |    |
| 98  | PRRSSIRNA      | Neutrophil cytosol factor 1, p47-PHOX                   | 0,919722307 | 0,218073417 |    |
| 99  | ILDTTGQEE      | K-Ras                                                   | 1,198065375 | 0,068189497 | On |
| 100 | NDSNYIVKG      | Macrophage colony stimulating factor I receptor         | 0,95866844  | 0,066061247 |    |
| 101 | EFLRTSAGS      | 5'-AMP-activated protein kinase                         | 0,636335169 | 0,308525633 |    |
| 102 | ERTNSLPPV      | Volt.-dep. L-type calcium channel alpha-1S              | 0,801257893 | 0,123600159 |    |
| 103 | IRRASTIEM      | Cardiac phospholamban                                   | 1,076979342 | 0,307796902 |    |
| 104 | NFDDYMKSL      | Fatty acid-binding protein                              | 0,846053515 | 0,332004344 |    |
| 105 | PYKFPSSPLRIPGZ |                                                         | 0,795682704 | 0,306302404 |    |
| 106 | GRTGRRNSI      |                                                         | 3,866158737 | 1,32444248  | On |
| 107 | ATPIYLDIL      | TrkC tyrosine kinase                                    | 1,176062623 | 0,272105549 |    |
| 108 | DMRQTVAVG      | elongation factor 1-alpha 1                             | 0,856916204 | 0,131115983 |    |
| 109 | GDRFTDEEV      | Myosin regulatory light chain 2                         | 2,076789933 | 0,432505489 | On |
| 110 | GSGSSVTSR      | Desmin                                                  | 1,139024653 | 0,100676883 |    |
| 111 | EEPQYEEIP      | Middle T antigen                                        | 2,24162131  | 0,548818734 | On |

|     |                |                                                         |             |             |    |
|-----|----------------|---------------------------------------------------------|-------------|-------------|----|
| 112 | ERRLSLVPD      | cystic fibrosis transmembrane conductance regulator     | 1,316768124 | 0,100993592 | On |
| 113 | RRSSSRPIR      | Protamine YI                                            | 2,594380609 | 0,88504604  |    |
| 114 | SKIGSTENL      | Microtubule-associated protein tau                      | 0,707216815 | 0,160223541 |    |
| 115 | NDMTSL         | Tropomyosin 1 alpha                                     | 0,718310532 | 0,208245608 |    |
| 116 | AARLSLTDP      | platelet glycoprotein IB                                | 0,662180785 | 0,220463219 |    |
| 117 | ARRSTTDAG      | Choriogonadotropin beta                                 | 0,785631554 | 0,118272794 |    |
| 118 | DLKDTKYKL      | myosin II heavy chain                                   | 0,773195811 | 0,128274493 |    |
| 119 | GAFSTVKGV      | rhodopsin kinase                                        | 1,265497391 | 0,166442333 |    |
| 120 | RGRASSHSS      | Lamin A/C                                               | 1,631392798 | 0,535532034 |    |
| 121 | RKRSRAEF       | Histone H2B                                             | 1,353537896 | 0,336181013 |    |
| 122 | LRAASLG        | Red cell/liver pyruvate kinase                          | 1,24471986  | 0,139762267 |    |
| 123 | RRRQSVLNL      | cystic fibrosis transmembrane conductance regulator     | 1,91340441  | 0,326557106 | On |
| 124 | SIDEYFSEQ      | Interferon receptor                                     | 1,453853772 | 0,192695078 |    |
| 125 | EESESD         | synaptic vesicle amine transporter                      | 1,503535585 | 0,450537573 |    |
| 126 | RRRS           | Troponin I                                              | 2,368733379 | 0,828655882 |    |
| 127 | TAYGTRRHL      | calponin alpha and beta                                 | 3,019405184 | 1,690837522 |    |
| 128 | TRRISQTSQ      | ryanodine receptor                                      | 1,816165209 | 0,568079643 |    |
| 129 | VTPRTPPPS      | Myelin basic protein                                    | 0,720570057 | 0,207148323 |    |
| 130 | REVSSLKSK      | myosin heavy chain                                      | 1,351658519 | 0,250732757 |    |
| 131 | PEETQTQD       | HSP90-alpha                                             | 1,048188269 | 0,30658789  |    |
| 132 | KKQISVR        | Glycogen phosphorylase                                  | 1,862161205 | 0,447964395 |    |
| 133 | WLTKSPDGN      | caldesmon                                               | 0,889173869 | 0,040073714 |    |
| 134 | SRRSSLGSL      | Volt.-dep. L-type calcium channel alpha-1S              | 3,10432542  | 1,025688957 |    |
| 135 | PETVYEVAG      | Cortactin                                               | 2,515606173 | 0,522977372 | On |
| 136 | QEPGSGPPE      | somatostatin receptor type 3                            | 0,698696703 | 0,120094618 |    |
| 137 | SVSSSPIKE      | transcriptional factor SWI5                             | 0,722829669 | 0,131017305 |    |
| 138 | TRLHSLRER      | Sucrose synthase 1                                      | 2,964851846 | 0,678840571 | On |
| 139 | PKEVYDVML      | TrkC tyrosine kinase                                    | 1,151193949 | 0,056235267 |    |
| 140 | PRTPGGRR       | Myelin basic protein                                    | 2,387920746 | 0,886400824 |    |
| 141 | KLSPSPSSR      | Lamin B1                                                | 1,453161844 | 0,332062503 |    |
| 142 | LEKKYVRRD      | macrophage colony stimulating factor 1 receptor         | 1,620723448 | 0,469307663 |    |
| 143 | QASSTPLSP      | Lamin A/C                                               | 0,83208552  | 0,162566096 |    |
| 144 | SRRDSLFP       | Sodium channel protein type II alpha                    | 1,531395695 | 0,157584759 | On |
| 145 | KQPIYVME       | Tyrosine-protein kinase transforming protein Fps        | 1,194765527 | 0,099970427 |    |
| 146 | LLQDSVDFS      | vimentin                                                | 1,356655169 | 0,245081652 |    |
| 147 | QLSTSEENS      | Alpha-S2 casein                                         | 0,818591328 | 0,155687361 |    |
| 148 | KIQASFRGH      | neurogranin                                             | 3,131990766 | 0,800618388 | On |
| 149 | NKGASQAGM      | calponin alpha and beta                                 | 0,944236871 | 0,065265725 |    |
| 150 | EIVESLSSS      | Beta casein                                             | 0,644476411 | 0,14211488  |    |
| 151 | ESSNYMAPY      | platelet-derived growth factor receptor                 | 0,628350294 | 0,020421962 |    |
| 152 | KRPSKRAKA      | Myelin basic protein                                    | 1,55792903  | 0,520011207 |    |
| 153 | NRAITARRQ      | Troponin I                                              | 1,386050447 | 0,409010466 |    |
| 154 | PYKFPSSPLRIPGZ |                                                         | 0,578364665 | 0,095039013 |    |
| 155 | GSRPSESNG      | Lens fiber major intrinsic protein                      | 0,9293129   | 0,086519401 |    |
| 156 | DAHKSKRQH      | transcription factor BAF1                               | 1,208124689 | 0,482594452 |    |
| 157 | DSLIYDDGL      | Probable receptor with tyrosine-protein kinase activity | 1,9718788   | 0,61083897  |    |
| 158 | GGRDSRSGS      | Myelin basic protein                                    | 0,751390379 | 0,115704063 |    |
| 159 | GVERSVRPT      | phosphorylase b kinase alpha                            | 0,916769437 | 0,215252026 |    |
| 160 | EGVKSDQAE      | neurofilament triplet M                                 | 0,59601714  | 0,074367589 |    |
| 161 | ESLSSSEES      | Beta casein                                             | 0,796138853 | 0,038916504 |    |
| 162 | RVRMSADAM      | Troponin I                                              | 0,758995135 | 0,101396949 |    |
| 163 | SNPTYSVMR      | Middle T antigen                                        | 1,937152669 | 0,461385506 |    |
| 164 | SSKRAK         | Myosin regulatory light chain 2                         | 1,535722676 | 0,510499256 |    |
| 165 | AGDGSDEEV      | myosin heavy chain                                      | 1,215767187 | 0,199399016 |    |
| 166 | AVDRYIAIT      | Beta-2 adrenergic receptor                              | 0,739124299 | 0,081211133 |    |
| 167 | DPLLTFRFP      | Lamin A/C                                               | 0,755760815 | 0,057338579 |    |

|     |                |                                                  |             |             |    |
|-----|----------------|--------------------------------------------------|-------------|-------------|----|
| 168 | GENIYIRHS      | erythrocyte protein 4.1                          | 1,030579464 | 0,349796034 |    |
| 169 | RLSPSPTSQ      | Lamin C                                          | 0,798931943 | 0,118322871 |    |
| 170 | RKESYSV        | Histone H2B                                      | 0,93589096  | 0,069857972 |    |
| 171 | PLSRTL         | Glycogen [starch] synthase                       | 0,720093391 | 0,145675269 |    |
| 172 | RSRASTPPA      | cAMP-dependent protein kinase II (PKA)           | 0,93063883  | 0,170208452 |    |
| 173 | SLSSSEESI      | Beta casein                                      | 1,457204066 | 0,026619795 | On |
| 174 | LRRASLAG       | Red cell/liver pyruvate kinase                   | 1,899067907 | 0,3170916   | On |
| 175 | ADSESEDEE      | cAMP-dependent protein kinase II (PKA)           | 1,865137654 | 0,858415279 |    |
| 176 | THERSPSPS      | phosphorylcholine transferase                    | 0,776378557 | 0,090481427 |    |
| 177 | TVTRSYSRV      | Lamin A/C                                        | 3,052568583 | 1,071521087 |    |
| 178 | YETDYRKG       | Insulin Receptor (IR)                            | 1,391990732 | 0,365564293 |    |
| 179 | RKQISVRGL      | Glycogen phosphorylase                           | 1,797971371 | 0,149402963 | On |
| 180 | AGTTYAL        | myosin heavy chain IA (fragment)                 | 0,852305357 | 0,084619897 |    |
| 181 | LRRASVA        | pyruvate kinase                                  | 1,646937086 | 0,269674409 | On |
| 182 | YRGYSLGNW      | Lysozyme C                                       | 0,709238962 | 0,020364851 |    |
| 183 | SSLKSRKRA      | spermatid nuclear transition protein 1           | 2,39620579  | 0,878723898 |    |
| 184 | PMRRSVSEA      | hormone sensitive lipase                         | 0,913435424 | 0,043120038 |    |
| 185 | RSKRSGSV       | phosphorylase b kinase beta                      | 3,25359956  | 1,07830386  |    |
| 186 | TEGQYQQQP      | Proto-oncogene tyrosine-protein kinase Lck       | 0,919284129 | 0,104802769 |    |
| 187 | TTPLSPTRL      | Lamin B2                                         | 1,272557542 | 0,227534337 |    |
| 188 | PQPEYVNQP      | Receptor tyrosine-protein kinase erbB-2          | 0,929410809 | 0,133894632 |    |
| 189 | VKRGISGL       | Histone H4                                       | 1,337016751 | 0,199850441 |    |
| 190 | KRKQISVRG      | Glycogen phosphorylase                           | 2,469558554 | 0,853241157 |    |
| 191 | LPVPSTHIG      | cGMP-dependent protein kinase (PKG)              | 0,957016796 | 0,22384318  |    |
| 192 | QRRHSLEPP      | Tyrosine-protein kinase transforming protein SRC | 1,111264786 | 0,161507968 |    |
| 193 | SRTLVSSSL      | Glycogen [starch] synthase                       | 1,02543266  | 0,029139323 |    |
| 194 | KRPSERAKA      | Myelin basic protein                             | 2,094147076 | 0,494339597 |    |
| 195 | LRGRSFMNN      | 6-phosphofructokinase                            | 1,699860045 | 0,222393338 | On |
| 196 | QRVSSYRRT      | Desmin                                           | 3,644176137 | 1,23234721  | On |
| 197 | HDLSEMFN       | Prolactin                                        | 0,771639792 | 0,131007396 |    |
| 198 | KRPSRAKA       | Myelin basic protein                             | 2,979253189 | 1,212760218 |    |
| 199 | EDNEYTARP      | Proto-oncogene tyrosine-protein kinase Src       | 2,994776722 | 1,360934172 |    |
| 200 | ENAPSSTSS      | DNA topoisomerase II                             | 0,843562334 | 0,122828403 |    |
| 201 | HMRSSMSGL      | acetyl-CoA carboxylase                           | 1,155535085 | 0,373389326 |    |
| 202 | LDRSSHAQR      | Insulin Receptor (IR)                            | 0,857620131 | 0,049995871 |    |
| 203 | PYKFPSSPLRIPGZ |                                                  | 0,758542243 | 0,125560267 |    |
| 204 | GKEIYNTIR      | Ras p21 activator protein                        | 0,812886082 | 0,082773908 |    |
| 205 | APATPGGRR      | Myelin basic protein                             | 1,665682614 | 0,377753883 |    |
| 206 | DEEESEEA       | elongation factor 1-beta                         | 1,221587046 | 0,167231973 |    |
| 207 | FFKKSIST       | glutamate receptor 6                             | 1,748421948 | 0,512294695 |    |
| 208 | GMGTSVERA      | pyruvate dehydrogenase E1                        | 0,897975936 | 0,123309647 |    |
| 209 | DYDSSDIED      | cactus                                           | 3,819487856 | 1,015660555 | On |
| 210 | EKRASQAF       | stathmin                                         | 0,966608465 | 0,109871235 |    |
| 211 | RRAVSELDA      | tyrosine 3-monooxygenase                         | 0,686890281 | 0,157129298 |    |
| 212 | SDGGYMDMS      | platelet-derived growth factor receptor          | 0,789943301 | 0,056434872 |    |
| 213 | NWHMTPPRK      | serine/threonine protein phosphatase PP1         | 1,042034188 | 0,154925172 |    |
| 214 | RRASI          | pyruvate kinase                                  | 2,776709172 | 0,875712026 |    |
| 215 | AKKGSEQES      | cAMP-dependent protein kinase (PKA)              | 0,774314763 | 0,089188425 |    |
| 216 | DDMTGYVA       | Mitogen-activated protein kinase p38             | 1,174675107 | 0,161158775 |    |
| 217 | ETDYRKG        | Insulin Receptor (IR)                            | 0,875123228 | 0,095801158 |    |
| 218 | YVTTSTRTY      | vimentin                                         | 0,962546272 | 0,138322066 |    |
| 219 | SPQPSTRGS      | protein phosphatase 1                            | 1,854327481 | 0,494547537 |    |
| 220 | RRAASVA        | pyruvate kinase                                  | 1,532815607 | 0,292016775 |    |
| 221 | RPSENGQP       | Lens fiber major intrinsic protein               | 0,716251165 | 0,126180189 |    |
| 222 | SASTPVKK       | Histone H1                                       | 1,092416109 | 0,141592247 |    |
| 223 | NSYGSRGN       | iron-responsive element binding protein          | 2,453554101 | 0,679687492 |    |

|     |                |                                                         |             |             |    |
|-----|----------------|---------------------------------------------------------|-------------|-------------|----|
| 224 | LRRASL         | pyruvate kinase                                         | 1,706997431 | 0,214660693 | On |
| 225 | SSTDSADSG      | Early E1A                                               | 0,671954922 | 0,082677027 |    |
| 226 | TKSGSTTKN      | eukaryotic translation initiation factor 4E             | 1,071550726 | 0,235031497 |    |
| 227 | VETTYADFI      | cAMP-dependent protein kinase inhibitor alpha           | 0,923509069 | 0,195583283 |    |
| 228 | YSFTTTAER      | Actin                                                   | 0,818614638 | 0,069430437 |    |
| 229 | SPFKYQSL       | Beta-2 adrenergic receptor                              | 0,740392748 | 0,050342687 |    |
| 230 | RKRSAAE        | Histone H2B                                             | 1,109054356 | 0,205537859 |    |
| 231 | VIKRSPRKR      | transcriptional factor SWI6                             | 2,322478435 | 0,972179389 |    |
| 232 | SPVKSPEAK      | neurofilament triplet M                                 | 0,758153353 | 0,086396855 |    |
| 233 | LRRASVAQL      | pyruvate kinase                                         | 2,704369841 | 0,746399148 | On |
| 234 | PRMPSLSVP      | Sodium channel protein                                  | 0,771205577 | 0,002993074 |    |
| 235 | SSPVYQDAV      | Cortactin                                               | 1,062546342 | 0,135532904 |    |
| 236 | TKDLYDALH      | T-cell surface glycoprotein CD3 zeta                    | 0,830465523 | 0,089338585 |    |
| 237 | LRSPSWEPF      | Heat Shock Protein 26                                   | 1,041937778 | 0,043142329 |    |
| 238 | PSLPTPPTR      | Microtubule-associated protein tau                      | 1,194106582 | 0,168727632 |    |
| 239 | KASASPRRK      | Histone H3                                              | 2,505736742 | 0,914275637 |    |
| 240 | KRRDYDLDA      | Probable receptor with tyrosine-protein kinase activity | 0,872935344 | 0,117100744 |    |
| 241 | PAPAVRASDRA    | Troponin I                                              | 0,681418575 | 0,124000427 |    |
| 242 | QSRASDKQT      | T-cell surface glycoprotein CD3 gamma                   | 0,706912413 | 0,08679382  |    |
| 243 | KGQESFKKQ      | Nucleophosmin                                           | 1,642482536 | 0,3402289   |    |
| 244 | KRSGSVYEP      | phosphorylase b kinase beta                             | 2,663169664 | 0,64006002  | On |
| 245 | KRAQISVRGL     | Glycogen phosphorylase                                  | 2,259153693 | 0,662187428 |    |
| 246 | HSSQSQGGG      | Lamin C                                                 | 0,743711039 | 0,038229996 |    |
| 247 | MAEAYSEIG      | T-cell surface glycoprotein CD3 zeta                    | 1,871005354 | 0,470640398 |    |
| 248 | EEESSYSYE      | RNA polymerase alpha                                    | 4,461684308 | 1,568714334 | On |
| 249 | EQPGSDDDED     | Ornithine decarboxylase                                 | 1,719554027 | 0,422161365 |    |
| 250 | IEQFSTVKG      | G protein-coupled receptor kinase 5                     | 0,908331878 | 0,069180156 |    |
| 251 | MLDHSESTK      | myelin                                                  | 0,766434145 | 0,133734933 |    |
| 252 | PYKFPSSPLRIPGZ |                                                         | 0,771281474 | 0,035431075 |    |
| 253 | GPRTTAQQ       | cGMP-dependent protein kinase (PKG)                     | 1,675406591 | 0,485580439 |    |
| 254 | AQDTYLVLD      | Erythropoietin Receptor                                 | 1,158603104 | 0,227473913 |    |
| 255 | DIPESQMEE      | Band 3 anion transport protein                          | 1,118570105 | 0,195218162 |    |
| 256 | FPRASFGSR      | Desmin                                                  | 2,743115447 | 0,605199243 | On |
| 257 | GRKASGSSP      | myosin light chain kinase                               | 1,165362246 | 0,21022655  |    |
| 258 | EDVGSDEEE      | HSP90-alpha                                             | 2,011330317 | 0,506491415 |    |
| 259 | EPAVSPLLP      | Tyrosine-protein kinase Dash/Abl                        | 1,095073639 | 0,117964968 |    |
| 260 | RRRASQLKI      | Gamma-aminobutyric-acid receptor beta-2                 | 1,148091903 | 0,229299833 |    |
| 261 | SFTTTAERE      | Actin                                                   | 0,812050715 | 0,021355527 |    |
| 262 | PLSRTL         | glycogen synthase                                       | 0,933729706 | 0,063351703 |    |
| 263 | SGRGK          | Histone H4                                              | 1,349366429 | 0,352442122 |    |
| 264 | APRSPGGRR      | Myelin basic protein                                    | 2,332018659 | 0,870428345 |    |
| 265 | DGERYDEDE      | Glycogen [starch] synthase                              | 1,690033111 | 0,646333286 |    |
| 266 | FKRPTLRRV      | troponin I                                              | 2,950430971 | 1,119434746 |    |
| 267 | REAEYEPET      | Cortactin                                               | 1,456008692 | 0,394341033 |    |
| 268 | DRVYIHPF       | Angiotensinogen                                         | 1,017209592 | 0,059621223 |    |
| 269 | VRRISGL        | Histone H4                                              | 1,862559331 | 0,545139598 |    |
| 270 | RRKGTDVNV      | Annexin I                                               | 1,223801572 | 0,307038553 |    |
| 271 | SETKTEEEE      | DNA topoisomerase II                                    | 1,072219479 | 0,132141236 |    |
| 272 | PQRATSNVF      | Myosin regulatory light chain 2                         | 1,156334333 | 0,237339341 |    |
| 273 | RRGSV          | pyruvate kinase or palladin                             | 2,804130613 | 0,745052464 | On |
| 274 | STSKSESSQ      | 40S ribosomal protein S6                                | 0,841183293 | 0,098730275 |    |
| 275 | TRAPSRTAS      | ATP-citrate (pro-S-) lyase                              | 1,759654489 | 0,569938062 |    |
| 276 | VPRTPGGRR      | Myelin basic protein                                    | 2,672729026 | 0,916794584 |    |
| 277 | RASSRSVR       | Lamin B0                                                | 4,052064575 | 1,326852613 | On |
| 278 | SPSSPASL       | phosphorylcholine transferase                           | 0,837181773 | 0,040852586 |    |
| 279 | RVYVHPF        |                                                         | 1,5840195   | 0,496368335 |    |



|     |                |                                                     |             |             |    |
|-----|----------------|-----------------------------------------------------|-------------|-------------|----|
| 280 | VRRVSDDDR      | Tyrosine 3-monooxygenase                            | 0,844436678 | 0,170434677 |    |
| 281 | SRKMSIQEY      | phosducin                                           | 1,013539612 | 0,054764739 |    |
| 282 | LSGFSEKKS      | myristolated alanine-rich C-kinase substrate        | 1,661250612 | 0,416232781 |    |
| 283 | PSSTSSSSI      | DNA topoisomerase II                                | 0,886660552 | 0,01589953  |    |
| 284 | STGIYEALE      | Alpha enolase                                       | 2,073477817 | 0,175368141 | On |
| 285 | TPPKSPSAS      | Microtubule-associated protein tau                  | 0,89519045  | 0,079595014 |    |
| 286 | LYSSSPGGA      | vimentin                                            | 0,807865605 | 0,056494784 |    |
| 287 | PVPKSPVEE      | neurofilament triplet M                             | 0,749104839 | 0,115444597 |    |
| 288 | KKASFKAKK      |                                                     | 2,620196699 | 1,025478292 |    |
| 289 | KSPAATPVK      | Actin and myosin binding protein                    | 1,596357379 | 0,453138815 |    |
| 290 | PLSKTSLVSS     | Glycogen [starch] synthase                          | 0,900878824 | 0,053132906 |    |
| 291 | SRGKSSSYS      | Fibrinogen alpha                                    | 1,739263948 | 0,469418644 |    |
| 292 | KKLGSKKPQ      | Sodium channel protein type II alpha                | 2,030331662 | 0,761348437 |    |
| 293 | KTASTRKV       | cystic fibrosis transmembrane conductance regulator | 3,098306336 | 0,987506994 | On |
| 294 | PRRRTRRAS      | Protamine YII                                       | 1,179909603 | 0,24375431  |    |
| 295 | IHQRSRRL       | Neutrophil cytosol factor 2                         | 1,693701229 | 0,516420418 |    |
| 296 | NDALSGSGN      | galectin-3                                          | 0,692222897 | 0,170924651 |    |
| 297 | EETQTQDQP      | HSP90-alpha                                         | 0,692073681 | 0,092179424 |    |
| 298 | ERSQSRKDS      | alpha-1B adrenergic receptor                        | 1,000081874 | 0,114220445 |    |
| 299 | IRQASQAGP      | synapsins                                           | 0,764642068 | 0,127882845 |    |
| 300 | NFDDYMKEV      | Fatty acid-binding protein                          | 1,353897469 | 0,302539137 |    |
| 301 | PYKFPSSPLRIPGZ |                                                     | 0,846573583 | 0,116509087 |    |
| 302 | GRRQSLIQD      | tyrosine 3-monooxygenase                            | 1,308351625 | 0,211535811 |    |
| 303 | ASFEYTILD      | Erythropoietin Receptor                             | 2,048174833 | 0,389892461 | On |
| 304 | DLSTYASIN      | Insulin receptor substrate 2                        | 1,104253426 | 0,113438517 |    |
| 305 | GDNDYIPL       | platelet-derived growth factor receptor             | 1,753456402 | 0,363250364 |    |
| 306 | GSESTEDQA      | Alpha-S1 casein                                     | 0,803608444 | 0,062876628 |    |
| 307 | EENVSVDDT      | eukaryotic translation initiation factor 4E         | 0,88267041  | 0,112283047 |    |
| 308 | ERRKSKSGA      | cAMP-regulated phosphoprotein 21                    | 1,189872467 | 0,11967137  |    |
| 309 | RRRSRSRS       | Lamin B receptor                                    | 3,545308717 | 1,085908651 | On |
| 310 | SKIGSLDNI      | Microtubule-associated protein tau                  | 0,848978353 | 0,124275963 |    |
| 311 | NDITSL         | Tropomyosin beta                                    | 1,087452415 | 0,212935294 |    |
| 312 | AARGSFIDAS     | rhodopsin kinase                                    | 0,755146056 | 0,139390171 |    |
| 313 | ARNDSVTVA      | cAMP response element-binding protein CRE-BP1       | 0,707515181 | 0,100841923 |    |
| 314 | DLFGSDEED      | elongation factor 1-beta                            | 1,90042098  | 0,389078563 | On |
| 315 | FSSRSYTSG      | Keratin 8                                           | 1,717804688 | 0,295678325 | On |
| 316 | RGKSSYSK       | Fibrinogen alpha                                    | 1,860194197 | 0,51782915  |    |
| 317 | RKRSRAEA       | Histone H2B                                         | 1,202551764 | 0,410722749 |    |
| 318 | LKRASLG        | pyruvate kinase                                     | 0,957927317 | 0,184959839 |    |
| 319 | RRRPTPATL      | Protein phosphatase inhibitor 1                     | 1,675052112 | 0,419805792 |    |
| 320 | SIADTFVGT      | Serine/threonine-protein kinase STE7                | 1,021328053 | 0,06504369  |    |
| 321 | LRRNSI         | cystic fibrosis transmembrane conductance regulator | 1,952603648 | 0,310581777 | On |
| 322 | RRRRASVA       | pyruvate kinase                                     | 3,543137714 | 1,300837139 |    |
| 323 | TATDYHTTS      | Band 3 anion transport protein                      | 0,911540157 | 0,139890659 |    |
| 324 | TRRASRPVR      | Protamine YII                                       | 2,420249827 | 1,108577673 |    |
| 325 | VSSSYRRM       | vimentin                                            | 2,925643409 | 0,790289352 | On |
| 326 | REVSSLKKNK     | myosin heavy chain                                  | 1,428812883 | 0,230910712 |    |
| 327 | LSYRRYSL       |                                                     | 2,703280571 | 0,556062558 | On |
| 328 | KKKASVA        | pyruvate kinase                                     | 1,182152242 | 0,138807354 |    |
| 329 | WKRTSMKLL      | dihydropyridine-sensitive calcium channel           | 1,835737217 | 0,753914663 |    |
| 330 | SRRQSVLVK      | glutamate receptor 6                                | 2,275464212 | 0,447700072 | On |
| 331 | PENDYEDVE      | Hematopoietic cell-specific LYN substrate           | 3,039399034 | 1,403268441 |    |
| 332 | QEGLYNELQ      | T-cell surface glycoprotein CD3 zeta                | 1,331881287 | 0,288001223 |    |
| 333 | SVPPSPSLS      | Glycogen [starch] synthase                          | 0,719182181 | 0,163089117 |    |
| 334 | TRKVSLAPQ      | cystic fibrosis transmembrane conductance regulator | 1,102742208 | 0,094427014 |    |
| 335 | PKDPSQRRR      | Proto-oncogene tyrosine-protein kinase Src          | 1,511856684 | 0,327487237 |    |

|     |                |                                                           |             |             |    |
|-----|----------------|-----------------------------------------------------------|-------------|-------------|----|
| 336 | KRKQISVR       | Glycogen phosphorylase                                    | 2,616659948 | 0,833815294 |    |
| 337 | KLRRSSSVG      | Acetylcholine receptor protein delta                      | 3,394198211 | 0,83514004  | On |
| 338 | LDPLSEPED      | Thyroid hormone receptor alpha                            | 1,704575497 | 0,30849042  |    |
| 339 | QAGMTAPGT      | calponin alpha and beta                                   | 0,794530638 | 0,197554031 |    |
| 340 | SRRASRPVR      | Protamine Z                                               | 1,703030779 | 0,207829632 | On |
| 341 | KPGFSPQPS      |                                                           | 1,02432395  | 0,0674601   |    |
| 342 | LLPMSPEEF      | Signal Transducer and Activator of Transcription 1        | 1,391147235 | 0,138643036 | On |
| 343 | QLNDSSEEE      | E7 protein                                                | 1,661552125 | 0,233018606 | On |
| 344 | KGGSYSQAA      | HLA class I histocompatibility antigen B7                 | 1,024441581 | 0,084770922 |    |
| 345 | NIYISPLKS      | Retinoblastoma-associated protein                         | 1,202503535 | 0,162891169 |    |
| 346 | EIRVSINEK      | cGMP-dependent protein kinase (PKG)                       | 0,660393924 | 0,165369018 |    |
| 347 | ESRISLPLP      | vimentin                                                  | 0,612942477 | 0,149668838 |    |
| 348 | KRPSIRAKA      | Myelin basic protein                                      | 2,806763485 | 0,724960958 | On |
| 349 | NPGFYVEAN      | 1-phosphatidylinositol-4,5-bisphosphate phosphodiesterase | 1,181446835 | 0,143669632 |    |
| 350 | PYKFPSSPLRIPGZ |                                                           | 0,588595718 | 0,189535956 |    |
| 351 | GSRGSGSSV      | Desmin                                                    | 0,906789703 | 0,158751399 |    |
| 352 | DAGASPVEK      | myristolated alanine-rich C-kinase substrate (MARCKS)     | 0,705308778 | 0,088253819 |    |
| 353 | DRRVSVAEE      | cAMP-dependent protein kinase II (PKA)                    | 0,598557769 | 0,138325347 |    |
| 354 | GGRASDYKS      | Myelin basic protein                                      | 0,92263847  | 0,06628234  |    |
| 355 | GVDTYVEMR      | Macrophage colony stimulating factor I receptor           | 0,874509013 | 0,066589254 |    |
| 356 | EGTHSTKRG      | Fibrinogen alpha                                          | 1,068578042 | 0,084735489 |    |
| 357 | ESLESYEIN      | Matrix Gla-protein                                        | 1,260667695 | 0,111177471 |    |
| 358 | RVRKTKGKY      | glutamate receptor 1                                      | 2,646697609 | 0,950460674 |    |
| 359 | SNPEYLSAS      | Insulin Receptor (IR)                                     | 1,202295529 | 0,127224922 |    |
| 360 | RRSTVA         | Protamines Z1 and Z2                                      | 1,537234654 | 0,132248646 | On |
| 361 | AEPGSPTAA      | myristolated alanine-rich C-kinase substrate (MARCKS)     | 0,609364934 | 0,162429877 |    |
| 362 | AVDGYVKPQ      | Signal Transducer and Activator of Transcription 5        | 0,767703577 | 0,051788744 |    |
| 363 | DPGVSYRTR      | pyruvate dehydrogenase E1                                 | 1,363146002 | 0,214776529 |    |
| 364 | GEINTEDDD      | calsequestrin                                             | 1,018185581 | 0,198503802 |    |
| 365 | RLSISTESQ      | phosphorylase b kinase alpha                              | 0,762680044 | 0,168492206 |    |
| 366 | RKEISVR        | Glycogen phosphorylase                                    | 1,626598957 | 0,301736285 |    |
| 367 | PGSPQKR        | Histone H2                                                | 0,707201031 | 0,105529443 |    |
| 368 | RSGYSSPGS      | Microtubule-associated protein tau                        | 0,86435293  | 0,056093942 |    |
| 369 | SLRASTSKS      | 40S ribosomal protein S6                                  | 1,954872682 | 0,207554213 | On |
| 370 | VRKISGL        | Histone H4                                                | 1,056368787 | 0,129901119 |    |
| 371 | ADGVYAASG      | Tyrosine-protein kinase transforming protein Fes          | 1,083285111 | 0,140959801 |    |
| 372 | TGFLTEYVA      | myelin                                                    | 1,355925621 | 0,171120634 |    |
| 373 | TVSTSLGHS      | muscarinic acetylcholine receptor M2                      | 0,712941627 | 0,184122813 |    |
| 374 | YDKEYYSVH      | Receptor tyrosine kinase for hepatocyte growth factor     | 1,366335338 | 0,152016307 |    |
| 375 | RKLSQGTR       | spermatid nuclear transition protein 2                    | 1,457595457 | 0,240864357 |    |
| 376 | NRKPSKDKD      | Gamma-aminobutyric-acid receptor gamma                    | 1,22808431  | 0,271350483 |    |
| 377 | LRRASPG        | pyruvate kinase                                           | 0,912062585 | 0,110666456 |    |
| 378 | YMAPYDNYV      | platelet-derived growth factor receptor                   | 1,429757982 | 0,236088204 |    |
| 379 | SSKAYGNGY      | Beta-2 adrenergic receptor                                | 1,052552946 | 0,038289507 |    |
| 380 | PLTPSGEAP      | EGF Receptor                                              | 0,880182371 | 0,160307146 |    |
| 381 | RRRRPTPA       | pyruvate kinase                                           | 4,071060148 | 1,331044427 | On |
| 382 | TEGQYQPQP      | Proto-oncogene tyrosine-protein kinase Lck                | 0,90336646  | 0,08813439  |    |
| 383 | TSSSIFDI       | DNA topoisomerase II                                      | 1,097610062 | 0,153826424 |    |
| 384 | PPSPSLSRH      | Glycogen [starch] synthase                                | 2,218152871 | 0,675350475 |    |
| 385 | SSKRAKAK       | Myosin regulatory light chain 2                           | 1,983107989 | 0,552740082 |    |
| 386 | KRKNSILNP      | cystic fibrosis transmembrane conductance regulator       | 1,753792076 | 0,236274688 | On |
| 387 | LNRMSFASN      | acetyl-CoA carboxylase                                    | 1,527444452 | 0,11079274  | On |
| 388 | QRHGSKYLA      | Myelin basic protein                                      | 0,964712763 | 0,104430708 |    |
| 389 | SRTASFSES      | ATP-citrate (pro-S-) lyase                                | 0,90899736  | 0,159519525 |    |
| 390 | KRPSDRAKA      | Myelin basic protein                                      | 1,816678645 | 0,258334841 | On |
| 391 | LRGPSWDPF      | Heat Shock Protein 27                                     | 0,939945688 | 0,144074582 |    |

|     |                |                                                           |             |             |    |
|-----|----------------|-----------------------------------------------------------|-------------|-------------|----|
| 392 | QRSTSTPNV      | RAF proto-oncogene ser/thr-protein kinase                 | 0,697841998 | 0,044989301 |    |
| 393 | HDALSGSGN      | galectin-3                                                | 0,666169059 | 0,033261249 |    |
| 394 | KRPSQRAKY      | Myelin basic protein                                      | 1,672789146 | 0,89052519  |    |
| 395 | EDNEYTARE      | Tyrosine-protein kinase Hck                               | 1,448713449 | 0,721045811 |    |
| 396 | ENAFSPSRS      | caldesmon                                                 | 0,776557296 | 0,063298684 |    |
| 397 | HKSGYLSSE      | Connection of cytoskeletal structure to plasma membrane   | 0,820247258 | 0,0880754   |    |
| 398 | LAYESHESM      | Matrix Gla-protein                                        | 0,853999079 | 0,050292723 |    |
| 399 | PYKFPSSPLRIPGZ |                                                           | 0,901928731 | 0,034442006 |    |
| 400 | GHQGTVPSPD     | Beta-2 adrenergic receptor                                | 0,575893848 | 0,065185756 |    |
| 401 | ANDEYFIRK      | Acetylcholine receptor protein beta                       | 0,618614617 | 0,080629449 |    |
| 402 | DEASTTVSK      | Rhodopsin                                                 | 0,653294446 | 0,065730646 |    |
| 403 | FEARYQQPF      | 1-phosphatidylinositol-4,5-bisphosphate phosphodiesterase | 0,839530554 | 0,016718025 |    |
| 404 | GLLRSWNDP      | Prolactin                                                 | 0,914187148 | 0,108504175 |    |
| 405 | DTVTSPQRA      | Proto-oncogene tyrosine-protein kinase Src                | 2,68596648  | 1,550061983 |    |
| 406 | EKHHSIDAQ      | Phosphoenolpyruvate carboxylase 1                         | 0,861677951 | 0,016537768 |    |
| 407 | RRASTIEMP      | Cardiac phospholamban                                     | 0,994394673 | 0,104734093 |    |
| 408 | SDEESNDDS      | calsequestrin                                             | 1,129564858 | 0,128447097 |    |
| 409 | NVFSSPGGT      | Actin and myosin binding protein                          | 0,72702803  | 0,009441185 |    |
| 410 | RRASF          | pyruvate kinase                                           | 1,982236346 | 0,65880627  |    |
| 411 | AKGGTVKAA      | annexin IV                                                | 1,017372891 | 0,128013255 |    |
| 412 | DDEITQDEN      | muscarinic acetylcholine receptor M2                      | 1,29069669  | 0,142815784 |    |
| 413 | ETDDYAEII      | Focal adhesion kinase                                     | 1,316462429 | 0,250873916 |    |
| 414 | YTTNPSKI       | transcriptional factor SWI7                               | 0,686347337 | 0,037718419 |    |
| 415 | SPLKSPYKI      | Retinoblastoma-associated protein                         | 0,883127704 | 0,209879049 |    |
| 416 | RKRRTRKE       | Histone H2B                                               | 1,371027521 | 0,56769068  |    |
| 417 | RPPGFTPFR      |                                                           | 1,352057601 | 0,303881617 |    |
| 418 | SASGTPNKE      | caldesmon                                                 | 0,736710089 | 0,161358274 |    |
| 419 | NSVDTSSLS      | Glycogen [starch] synthase                                | 0,980739557 | 0,100114652 |    |
| 420 | LRANSI         | cystic fibrosis transmembrane conductance regulator       | 1,076719198 | 0,097922484 |    |
| 421 | SSSSPSRR       | Lamin B receptor                                          | 1,411487014 | 0,623920619 |    |
| 422 | TKSASFLKG      | nodulin-26                                                | 1,162363729 | 0,377810284 |    |
| 423 | VESLSSSEE      | Beta casein                                               | 1,373066236 | 0,024375062 | On |
| 424 | YRRNSVRFL      | Neutrophil cytosol factor 3                               | 2,203504794 | 0,51540932  | On |
| 425 | SPALTGDEA      | Insulin receptor substrate 4                              | 0,917220562 | 0,110177203 |    |
| 426 | RKQITVR        | Glycogen phosphorylase                                    | 1,796215304 | 0,674291482 |    |
| 427 | VHNRSKINL      | HMG-CoA reductase                                         | 1,333556642 | 0,313133499 |    |
| 428 | SPVHSIADE      | fructose-1,6-bisphosphatase                               | 0,765639099 | 0,016535041 |    |
| 429 | LRRASLGAF      | pyruvate kinase                                           | 2,13232975  | 0,78440819  |    |
| 430 | PRKGSPRKG      | Histone H2B.2                                             | 1,269052215 | 0,458483218 |    |
| 431 | SSPGSPGTP      | Microtubule-associated protein tau                        | 0,785067549 | 0,111947983 |    |
| 432 | TKAASEKKT      | myelin                                                    | 0,968562977 | 0,0834914   |    |
| 433 | LRRSSSVGY      | Acetylcholine receptor protein delta                      | 4,001641657 | 1,73793861  |    |
| 434 | PSEKSEEIT      | astrocytic phosphoprotein PEA-15                          | 1,090684381 | 0,141346838 |    |
| 435 | KAQEYFNIK      | Acetylcholine receptor protein delta                      | 0,728534947 | 0,059446966 |    |
| 436 | KRQSSTSNA      | phosphorylase b kinase beta                               | 1,259965256 | 0,33885437  |    |
| 437 | QKRPSQRSKYL    | Myelin basic protein                                      | 2,379264113 | 1,057368843 |    |
| 438 | QSPSSSPH       | phosphorylcholine transferase                             | 0,923216078 | 0,115562083 |    |
| 439 | KGHEYTNIK      | Protein-tyrosine phosphatase 2                            | 1,227571043 | 0,265147689 |    |
| 440 | KRRSSSYHV      | Sodium channel protein type II alpha                      | 3,839837835 | 1,848475748 |    |
| 441 | KAKQISVRGL     | Glycogen phosphorylase                                    | 1,947625914 | 0,870322436 |    |
| 442 | HSIYSSDDD      | Myb proto-oncogene protein                                | 1,103504181 | 0,499654889 |    |
| 443 | LVMQTAAGT      | myosin light chain kinase                                 | 1,315699648 | 0,316451808 |    |
| 444 | EEELYLEPL      | Tyrosine-protein kinase receptor                          | 2,225996644 | 0,263602644 | On |
| 445 | EQLSTSEEN      | Alpha-S2 casein                                           | 1,143076899 | 0,17074771  |    |
| 446 | IDMESQERI      | Transcription factor AP-1                                 | 1,028964315 | 0,044448722 |    |
| 447 | MILLSELSR      | eukaryotic translation initiation factor 4F               | 0,917040193 | 0,117861252 |    |

|     |                |                                                       |             |             |    |
|-----|----------------|-------------------------------------------------------|-------------|-------------|----|
| 448 | PYKFPSSPLRIPGZ |                                                       | 0,719041492 | 0,069532224 |    |
| 449 | GPAASPAAA      | myristolated alanine-rich C-kinase substrate (MARCKS) | 0,652178398 | 0,125662384 |    |
| 450 | AQAASPAKG      | Protein tyrosine phosphatase 1B                       | 0,761011702 | 0,069485846 |    |
| 451 | DHSRSTKAA      | myelin                                                | 1,208503766 | 0,217417154 |    |
| 452 | FPFHSPSRL      | Alpha crystallin B                                    | 1,997500277 | 0,260795677 | On |
| 453 | GRILTLPRS      | Insulin Receptor (IR)                                 | 1,820363202 | 0,347178674 | On |
| 454 | EDVGSDEED      | Heat Shock Protein 90-beta                            | 1,750877535 | 0,130064007 | On |
| 455 | ENTVSTSLG      | muscarinic acetylcholine receptor M2                  | 0,826102411 | 0,063149826 |    |
| 456 | RRQHSYDTF      | glutamate (NMDA) receptor epsilon                     | 1,128276389 | 0,135761659 |    |
| 457 | SFMMTPYVV      | Stress-activated protein kinase JNK1                  | 0,946264195 | 0,150298168 |    |
| 458 | PGTESFVNA      | Beta-2 adrenergic receptor                            | 1,027371154 | 0,140184167 |    |
| 459 | SDEEV          | Troponin T                                            | 1,233503307 | 0,110665829 |    |
| 460 | APQTPGGRR      | Myelin basic protein                                  | 1,663343985 | 0,369508737 |    |
| 461 | DFPLSPPKK      | stathmin                                              | 1,068917389 | 0,042914961 |    |
| 462 | FKAFSPKGS      | Actin and myosin binding protein                      | 1,494252385 | 0,354594888 |    |
| 463 | RDSNYISKG      | platelet-derived growth factor receptor               | 1,081133724 | 0,143629973 |    |
| 464 | DDEESESD       | synaptic vesicle amine transporter                    | 2,776665969 | 0,191148294 | On |
| 465 | VKRISGL        | Histone H4                                            | 1,43108043  | 0,12771296  | On |
| 466 | RRKDYPALH      |                                                       | 1,155230523 | 0,099278384 |    |
| 467 | SEKKSGLG       | myelin                                                | 0,904274475 | 0,098133903 |    |
| 468 | PPSAYGSVK      | Annexin II                                            | 1,613236844 | 0,189599872 | On |
| 469 | RRFSV          | pyruvate kinase                                       | 2,572389107 | 0,484243348 | On |
| 470 | STRRSVGRS      | multidrug resistance protein 1                        | 3,846999414 | 1,278582135 | On |
| 471 | TQSTSGRRR      | cAMP response element-binding protein CRE-BP2         | 2,885946041 | 1,199603404 |    |
| 472 | VNELSKDIG      | Alpha-S1 casein                                       | 0,821559454 | 0,099831873 |    |
| 473 | RAGETRFTD      | elongation factor 3                                   | 0,832854482 | 0,118248618 |    |
| 474 | SPSPSFRWP      | phosphorylcholine transferase                         | 1,143934922 | 0,202674664 |    |
| 475 | RVSGSRR        | Lamin C                                               | 3,829770846 | 1,189430328 | On |
| 476 | VRLRSSVPG      | vimentin                                              | 1,920422811 | 0,378172851 | On |
| 477 | SRKLSDFGQ      | Phenylalanine-4-hydroxylase                           | 1,08559797  | 0,086234691 |    |
| 478 | LSGFSFKKN      | myristolated alanine-rich C-kinase substrate          | 1,632434338 | 0,284301131 |    |
| 479 | PSRRSRRS       | Lamin B receptor                                      | 1,132610344 | 0,054154406 |    |
| 480 | STDYYREGP      | TrkC tyrosine kinase                                  | 2,233308329 | 0,491420084 | On |
| 481 | TPAISPSKR      | deoxyuridine 5'-triphosphate nucleotidohydrolase      | 1,733978566 | 0,401711749 |    |
| 482 | LVVASAGPT      | RNA polymerase alpha                                  | 0,916307119 | 0,116548364 |    |
| 483 | PVPEYINQS      | EGF Receptor                                          | 1,244967641 | 0,06617174  | On |
| 484 | KKAESPVKE      | neurofilament triplet M                               | 1,100125065 | 0,110855444 |    |
| 485 | KSLNYIDLD      | Insulin receptor substrate 5                          | 1,658531797 | 0,183038925 | On |
| 486 | KRKQISVRGL     | Glycogen phosphorylase                                | 2,093840516 | 0,558871876 |    |
| 487 | SRGDYMTMQ      | Insulin receptor substrate 6                          | 0,878716159 | 0,127570496 |    |
| 488 | KKKSGGEDD      | eukaryotic translation initiation factor 4F           | 0,940353874 | 0,081251384 |    |
| 489 | KTSPSSSPA      | phosphorylcholine transferase                         | 0,931636243 | 0,137632984 |    |
| 490 | PRRRSSFGI      | Acetylcholine receptor protein gamma                  | 1,211326637 | 0,015540667 | On |
| 491 | IGSVSEDNS      | acetyl-CoA carboxylase                                | 1,800105005 | 0,822032809 |    |
| 492 | NAPVSALGE      | Myb proto-oncogene protein                            | 0,814157546 | 0,229482967 |    |
| 493 | EETPYSYPT      | Paxillin                                              | 2,078987023 | 0,75805896  |    |
| 494 | ERSPSPSFR      | phosphorylcholine transferase                         | 1,944794528 | 0,656816618 |    |
| 495 | IRKYTMRRL      | Receptor tyrosine-protein kinase erbB-2               | 2,129374195 | 1,077538882 |    |
| 496 | NEEESSYSY      | RNA polymerase alpha                                  | 3,171296181 | 1,271308778 |    |
| 497 | PYKFPSSPLRIPGZ |                                                       | 1,055669722 | 0,121129868 |    |
| 498 | GRRQSLIED      | Tyrosine 3-monooxygenase                              | 1,443231222 | 0,081831165 | On |
| 499 | ASATSSSGG      | Glycogen [starch] synthase                            | 0,846243067 | 0,11753345  |    |
| 500 | DLPMPSPRTL     | Signal Transducer and Activator of Transcription 3    | 0,809690201 | 0,040336571 |    |
| 501 | GDLQSAEFH      | Cystatin                                              | 0,986607229 | 0,152366649 |    |
| 502 | GSEEMYMMD      | Insulin receptor substrate 3                          | 0,937203724 | 0,160713917 |    |
| 503 | EENTYDEYE      | Cortactin                                             | 1,41662419  | 0,082615941 | On |

|     |                |                                                           |             |             |    |
|-----|----------------|-----------------------------------------------------------|-------------|-------------|----|
| 504 | ERRKSHEAE      | stathmin                                                  | 1,335916994 | 0,405629833 |    |
| 505 | RRRVTSATR      | glial fibrillary acidic protein                           | 2,425769891 | 1,298768391 |    |
| 506 | SKDSSKRGR      | myelin                                                    | 2,042750587 | 1,023818901 |    |
| 507 | MSVEEV         | eukaryotic translation initiation factor 4E               | 0,893140839 | 0,130894224 |    |
| 508 | AALESEDED      | eukaryotic translation initiation factor 4F               | 1,567114121 | 0,392665787 |    |
| 509 | ARKSTRRSI      | pleckstrin                                                | 2,495171198 | 0,898139398 |    |
| 510 | DLFGSDDEE      | elongation factor 1-beta                                  | 1,85807007  | 0,443789311 |    |
| 511 | FRRLSISTE      | phosphorylase b kinase alpha                              | 1,220022858 | 0,153649953 |    |
| 512 | RGAISAEVY      | cAMP-dependent protein kinase (PKA)                       | 1,264939603 | 0,216209841 |    |
| 513 | RKISASEF       |                                                           | 0,997244348 | 0,170566708 |    |
| 514 | LHRASLG        | pyruvate kinase                                           | 1,229631715 | 0,392013553 |    |
| 515 | RRRPTPAML      | Dopamine- and cAMP-regulated neuronal phosphoprotein      | 1,417547221 | 0,56757342  |    |
| 516 | SGYSSPGSP      |                                                           | 0,828261588 | 0,176454529 |    |
| 517 | LGEFTP         | Calgranulin B                                             | 0,888461689 | 0,129965409 |    |
| 518 | RRLSSLRA       | 40S ribosomal protein S6                                  | 3,361005711 | 0,737933472 | On |
| 519 | TAESSQAE       | Neuromodulin                                              | 1,111117806 | 0,202290093 |    |
| 520 | TRRASFSAQ      | Regulatory protein ADR1                                   | 2,430323388 | 0,728993039 |    |
| 521 | VSRTSAVPT      | Desmin                                                    | 0,935975523 | 0,163604517 |    |
| 522 | REQLSTSEE      | Alpha-S2 casein                                           | 0,993212467 | 0,183043916 |    |
| 523 | LSYRGYSL       |                                                           | 0,967151273 | 0,154041971 |    |
| 524 | KASGSSP        |                                                           | 0,818871104 | 0,105254124 |    |
| 525 | VVGGSRLGA      | Protein tyrosine phosphatase 1B                           | 1,733158963 | 0,436228931 |    |
| 526 | SRRPSYRKI      | cAMP response element binding protein                     | 2,010956463 | 0,592826874 |    |
| 527 | PEGDYEEVL      | Hematopoietic cell-specific LYN substrate                 | 2,578264557 | 0,617900243 | On |
| 528 | QEGDTDAGL      |                                                           | 1,407520341 | 0,206453947 |    |
| 529 | SVFSSPAS       | caldesmon                                                 | 0,98259905  | 0,119797415 |    |
| 530 | TRKISQTAQ      | ryanodine receptor                                        | 1,134939429 | 0,175861963 |    |
| 531 | PINGSPRTP      | Retinoblastoma-associated protein                         | 0,859976936 | 0,116108488 |    |
| 532 | KQISVRGL       | Glycogen phosphorylase                                    | 1,838960378 | 0,656600601 |    |
| 533 | KLINSIADT      | Serine/threonine-protein kinase STE7                      | 1,026064249 | 0,152671087 |    |
| 534 | LDDQYTSSS      | Tyrosine-protein kinase Tec                               | 2,439806872 | 0,658116189 | On |
| 535 | PYDNYVPSA      | platelet-derived growth factor receptor                   | 1,719472751 | 0,454512831 |    |
| 536 | SRQLSSGVS      | Heat Shock Protein 27                                     | 0,887365927 | 0,024343731 |    |
| 537 | KNIVTPRTP      | Myelin basic protein                                      | 1,651393776 | 0,635779262 |    |
| 538 | LKLASPELE      | Transcription factor AP-2                                 | 0,893516321 | 0,035127683 |    |
| 539 | QLIDSMANS      | mitogen-activated protein kinase kinase 1                 | 0,799834306 | 0,113114919 |    |
| 540 | IVYKSPVVS      |                                                           | 1,086638498 | 0,164422905 |    |
| 541 | NGYISAAEL      | Calmodulin                                                | 1,775345887 | 0,870729229 |    |
| 542 | EILNSPEKA      | 14-3-3 protein alpha/beta/delta/zeta                      | 0,785196865 | 0,095130625 |    |
| 543 | ESPESTEIT      | insulin-like growth factor binding protein 1              | 0,918095646 | 0,154119984 |    |
| 544 | KRPSHRAKA      | Myelin basic protein                                      | 1,709454078 | 0,449495142 |    |
| 545 | NNYVYIDPT      | Mast/stem cell growth factor receptor                     | 1,320951971 | 0,123742382 |    |
| 546 | PYKFPSSPLRIPGZ |                                                           | 0,689987315 | 0,027203496 |    |
| 547 | GSPRTPRRG      | Retinoblastoma-associated protein                         | 2,605455258 | 0,576866601 | On |
| 548 | DADEYLIPQ      | EGF Receptor                                              | 1,892611382 | 0,21693184  | On |
| 549 | DRLVSARSV      | Receptor tyrosine kinase for hepatocyte growth factor     | 1,480120771 | 0,120961609 | On |
| 550 | GGLTSPGLS      | Keratin 8                                                 | 0,72149906  | 0,171803804 |    |
| 551 | GTVPSDNID      | Beta-2 adrenergic receptor                                | 0,935054939 | 0,049642482 |    |
| 552 | EGSAYEEVP      | 1-phosphatidylinositol-4,5-bisphosphate phosphodiesterase | 1,499885704 | 0,581304515 |    |
| 553 | ESIISQETY      | Alpha-S2 casein                                           | 1,665649162 | 0,229051544 | On |
| 554 | RVRKSKGKY      | glutamate receptor 2                                      | 2,907834786 | 1,244790769 |    |
| 555 | SNDSTSVSA      | muscarinic acetylcholine receptor M2                      | 0,846741891 | 0,195384936 |    |
| 556 | RRPTVA         | Protein phosphatase inhibitor 2                           | 1,693158466 | 0,089957661 | On |
| 557 | AEPDYGALY      | 1-phosphatidylinositol-4,5-bisphosphate phosphodiesterase | 2,018171284 | 0,239858349 | On |
| 558 | AVASSPSKA      | myristolated alanine-rich C-kinase substrate (MARCKS)     | 0,781582978 | 0,068146991 |    |
| 559 | DPGTSYRTR      | pyruvate dehydrogenase E1                                 | 1,12355605  | 0,146179614 |    |



|     |                |                                                  |             |             |    |
|-----|----------------|--------------------------------------------------|-------------|-------------|----|
| 560 | GEGTYGVVY      | cell division control protein 2                  | 1,339395246 | 0,319763283 |    |
| 561 | RLRLSPSPT      | Lamin C                                          | 1,303022598 | 0,147237464 |    |
| 562 | RKASRKE        | Histone H2B                                      | 1,60412045  | 0,246806837 | On |
| 563 | LRRWSLG        | pyruvate kinase                                  | 1,38500739  | 0,075815126 | On |
| 564 | RRVTSATRR      | glial fibrillary acidic protein                  | 3,399330664 | 0,618883926 | On |
| 565 | SLQASIVTD      | guanine nucleotide-binding protein alpha         | 0,819096737 | 0,061389858 |    |
| 566 | RRATPA         | pyruvate kinase                                  | 1,297565659 | 0,214714169 |    |
| 567 | ADGIYAASG      | Tyrosine-protein kinase transforming protein Fes | 1,200338464 | 0,201546744 |    |
| 568 | TGDTYTAHA      | Tyrosine-protein kinase Dash/Abl                 | 0,825089446 | 0,230231862 |    |
| 569 | TVSKTETSQ      | Rhodopsin                                        | 0,749166234 | 0,176523231 |    |
| 570 | WSDTQGDE       | 14-3-3 protein zeta                              | 1,432896443 | 0,140530002 | On |
| 571 | RKFSSARPE      | Sodium channel protein                           | 1,279755401 | 0,119892727 |    |
| 572 | KKKKASVA       | pyruvate kinase                                  | 1,223655228 | 0,410442752 |    |
| 573 | LRRASLG        | pyruvate kinase                                  | 2,356633176 | 0,483898676 | On |
| 574 | YKNDYYRKR      | Ros proto-oncogene tyrosine kinase               | 1,509485238 | 0,31896533  |    |
| 575 | SSEITTKDL      | Prothymosin                                      | 1,021594524 | 0,122472092 |    |
| 576 | PLSRTLVS       | glycogen synthase                                | 1,639054579 | 0,341803406 |    |
| 577 | LRRASLRG       | pyruvate kinase                                  | 4,3974186   | 1,435839996 | On |
| 578 | TEGQYELQP      | Tyrosine-protein kinase Blk                      | 1,51037762  | 0,168500547 | On |
| 579 | TSPSSPAS       | phosphorylcholine transferase                    | 0,614013813 | 0,143337218 |    |
| 580 | PPSAYGSVK      | Annexin II                                       | 1,189409053 | 0,103539939 |    |
| 581 | RTKRSGSV       | phosphorylase b kinase beta                      | 2,887707946 | 0,756720562 | On |
| 582 | KRFGSKAHM      | nitric-oxide synthase                            | 2,274628886 | 0,85510489  |    |
| 583 | LNDSEEEED      | E7 protein                                       | 1,707439515 | 0,238768259 | On |
| 584 | QRATSNVFA      | Myosin regulatory light chain 3                  | 0,923589055 | 0,0264244   |    |
| 585 | SRSRTPSLP      |                                                  | 2,259044698 | 0,33064252  | On |
| 586 | KRPSARAKA      | Myelin basic protein                             | 2,651053094 | 0,592322493 | On |
| 587 | LRAPSWIDT      | Alpha crystallin B                               | 1,193053084 | 0,086231806 |    |
| 588 | QRRTSVSGE      | cAMP-dependent protein kinase                    | 1,248582046 | 0,293575686 |    |
| 589 | HATPSPVD       | Myb proto-oncogene protein                       | 0,655318117 | 0,094508217 |    |
| 590 | KRPSQRAKA      | Myelin basic protein                             | 1,671313537 | 0,921348947 |    |
| 591 | EDAESEDEE      | Nucleophosmin                                    | 2,053716188 | 0,860828871 |    |
| 592 | ENAEYLRVA      | EGF Receptor                                     | 1,108807783 | 0,224283014 |    |
| 593 | HKRKSSQAL      | Transforming protein erbA                        | 1,380891568 | 0,525851174 |    |
| 594 | LAYESHESL      | Matrix Gla-protein                               | 0,994212305 | 0,074638879 |    |
| 595 | PYKFPSSPLRIPGZ |                                                  | 0,875944527 | 0,142155806 |    |
| 596 | GGVDYKNIH      | Macrophage colony stimulating factor I receptor  | 0,639303171 | 0,034823826 |    |
| 597 | ALRPSTSRS      | vimentin                                         | 1,188851621 | 0,478624936 |    |
| 598 | DEAATKTQT      | myosin II heavy chain                            | 0,981389811 | 0,166450065 |    |
| 599 | FARKSTRRS      | pleckstrin                                       | 2,264009689 | 1,193822789 |    |
| 600 | GLGESRKDK      | myelin                                           | 1,141852821 | 0,22149222  |    |
| 601 | DTHRTPSRS      | Proto-oncogene tyrosine-protein kinase Src       | 1,160090918 | 0,255413824 |    |
| 602 | EKESSNDST      | muscarinic acetylcholine receptor M2             | 0,745547701 | 0,035635709 |    |
| 603 | RRAISGLT       | dihydropyridine-sensitive calcium channel        | 0,636634544 | 0,076410396 |    |
| 604 | SAYRSVDEV      | 2-oxoisovalerate dehydrogenase alpha             | 0,863069863 | 0,051967355 |    |
| 605 | NTVSTSLGH      | muscarinic acetylcholine receptor M2             | 1,096155186 | 0,235623294 |    |
| 606 | RASLG          |                                                  | 1,225091814 | 0,306402362 |    |
| 607 | AKDASKRGR      | myelin                                           | 1,673621695 | 0,546688835 |    |
| 608 | DDEASTTVS      | Rhodopsin                                        | 1,067663713 | 0,067116126 |    |
| 609 | ETAESSQAE      | Neuromodulin                                     | 0,876277028 | 0,036861679 |    |
| 610 | YTRFSLARQ      | Transferrin receptor protein 1                   | 1,139323321 | 0,399762984 |    |
| 611 | SPKQSPSSS      | phosphorylcholine transferase                    | 0,638849729 | 0,032672105 |    |
| 612 | RKRSRKE        | Histone H2B                                      | 0,827718089 | 0,082944047 |    |
| 613 | RPPGFSPFR      |                                                  | 1,171831903 | 0,316903644 |    |
| 614 | SARVYENVG      | Protein-tyrosine phosphatase 3                   | 0,771941186 | 0,129787754 |    |
| 615 | NRSASEPSL      | RAF proto-oncogene ser/thr-protein kinase        | 0,745691385 | 0,008377142 |    |



|     |                |                                                           |             |             |    |
|-----|----------------|-----------------------------------------------------------|-------------|-------------|----|
| 616 | KGYSLG         | Lysozyme C                                                | 0,902328761 | 0,107530765 |    |
| 617 | SSSSSPKAE      | myristolated alanine-rich C-kinase substrate (MARCKS)     | 0,624559648 | 0,010369601 |    |
| 618 | TKKTSFVNF      | eukaryotic translation initiation factor 2 beta           | 1,284234969 | 0,525967679 |    |
| 619 | VEPLTPSGE      | EGF Receptor                                              | 0,754056996 | 0,018886081 |    |
| 620 | YRLPSNVQD      | Alpha crystallin A                                        | 0,749944189 | 0,074980422 |    |
| 621 | SPAISIHEI      | phosphorylase b kinase alpha                              | 0,928040612 | 0,292437368 |    |
| 622 | RKQISVR        | Glycogen phosphorylase                                    | 0,93406497  | 0,03932193  |    |
| 623 | VGWPTVRER      | Nef                                                       | 1,200754329 | 0,448533241 |    |
| 624 | QTYRSFHDL      | cGMP-dependent protein kinase (PKG)                       | 1,203632589 | 0,487214873 |    |
| 625 | LRRASLGAA      | pyruvate kinase                                           | 2,484326505 | 1,095223848 |    |
| 626 | PRKGSPPRG      | Histone H2B.2                                             | 0,924791664 | 0,137486579 |    |
| 627 | SSPASLSRA      | phosphorylcholine transferase                             | 1,052718317 | 0,350715961 |    |
| 628 | TKAASEKKS      | myelin                                                    | 0,778769076 | 0,047026248 |    |
| 629 | LRRPSDQEV      | c-Rel proto-oncogene protein                              | 0,738559697 | 0,051385121 |    |
| 630 | PSAPSPQPK      | Tyrosine 3-monooxygenase                                  | 0,715587911 | 0,079310998 |    |
| 631 | KAKVTGRWK      | troponin T                                                | 2,282000004 | 0,93099873  |    |
| 632 | KRPTQRAKY      | Myelin basic protein                                      | 2,96166012  | 1,304021682 |    |
| 633 | PLSRTL SVRSL   | Glycogen [starch] synthase                                | 2,007374416 | 0,154160462 | On |
| 634 | QSPGSPLEE      | Neutrophil cytosol factor 5                               | 0,787272398 | 0,056263309 |    |
| 635 | KGGSYSQAA      | HLA class I histocompatibility antigen B7                 | 1,028341664 | 0,155890652 |    |
| 636 | KRRRSSKDT      | glutamate (NMDA) receptor subunit zeta 4                  | 1,845385011 | 0,651663026 |    |
| 637 | KAQISVRGL      | Glycogen phosphorylase                                    | 1,11550764  | 0,369948764 |    |
| 638 | HRTPSRSFG      | Proto-oncogene tyrosine-protein kinase Src                | 1,960618958 | 0,747582474 |    |
| 639 | LSGF SFKKN     | myristolated alanine-rich C-kinase substrate              | 1,478125516 | 0,483064522 |    |
| 640 | EEEEYMPME      | Middle T antigen                                          | 1,079105652 | 0,030132265 |    |
| 641 | EQFSTVKGV      | G protein-coupled receptor kinase 6                       | 0,885067607 | 0,016115879 |    |
| 642 | IDKISRIGF      | glycine receptor alpha                                    | 1,131135765 | 0,146734852 |    |
| 643 | MHRQETVDA      | calcium/calmodulin-dependent protein kinase type II alpha | 0,712019219 | 0,100792689 |    |
| 644 | PYKFPSSPLRIPGZ |                                                           | 0,833715373 | 0,133998597 |    |
| 645 | GNHTYQEIA      | Paxillin                                                  | 0,909677604 | 0,075275027 |    |
| 646 | APVASPAAP      | synapsins IA and IB                                       | 0,857873191 | 0,134286606 |    |
| 647 | DGNN SDEES     | calsequestrin                                             | 1,136403151 | 0,132070766 |    |
| 648 | FMTEYVVTR      | mitogen-activated protein kinase MSK7                     | 1,16005548  | 0,132287454 |    |
| 649 | GRGLSLSRF      | Myelin basic protein                                      | 1,914432113 | 0,422447233 |    |
| 650 | EDTLSDSDD      | N-myc proto-oncogene protein                              | 2,486473284 | 0,785120332 |    |
| 651 | ENQASEEED      | Dopamine- and cAMP-regulated neuronal phosphoprotein      | 1,200209495 | 0,24776809  |    |
| 652 | RRPTSPVSR      | Early E1A                                                 | 1,860298914 | 0,902587771 |    |
| 653 | SFMDSSGLG      | anti-sigma F factor antagonist                            | 0,956946953 | 0,08738191  |    |
| 654 | QKRPSQRSK      | Myelin basic protein                                      | 1,823050593 | 0,730304302 |    |
| 655 | SDEEH          | initiation factor 5A                                      | 0,897106314 | 0,103036444 |    |
| 656 | APLTPGGRR      | Myelin basic protein                                      | 1,525326594 | 0,487099237 |    |
| 657 | DEPSTPYHS      | Protein phosphatase inhibitor 2                           | 0,939257957 | 0,084556712 |    |
| 658 | FGSRSLYGL      | keratin, type II                                          | 1,231746384 | 0,246063505 |    |
| 659 | RDPVTENAV      | muscarinic acetylcholine receptor M2                      | 0,889262357 | 0,022550766 |    |
| 660 | AVRRSDRA       | Troponin I                                                | 1,43974079  | 0,494965769 |    |
| 661 | VKRG SGL       | Histone H4                                                | 1,294445766 | 0,471559589 |    |
| 662 | RRKDTPALH      |                                                           | 1,033397642 | 0,216652143 |    |
| 663 | SEITTKDLK      | Prothymosin                                               | 0,882859874 | 0,0387903   |    |
| 664 | PNVSYIASR      | protein kinase shaggy                                     | 1,24117361  | 0,330720163 |    |
| 665 | RRDSV          | pyruvate kinase                                           | 1,412513386 | 0,288552885 |    |
| 666 | STRRSIRLP      | pleckstrin                                                | 3,454191234 | 1,794786004 |    |
| 667 | TPQVSDTMR      | glycogenin                                                | 0,991680073 | 0,093524322 |    |
| 668 | VNATYVNVK      | Receptor tyrosine kinase for hepatocyte growth factor     | 0,807487727 | 0,025841724 |    |
| 669 | RAAHSIKGG      | Chemotaxis protein cheA                                   | 1,353040775 | 0,458098477 |    |
| 670 | SPSLSRHSS      | Glycogen [starch] synthase                                | 1,820848841 | 0,824778512 |    |
| 671 | RTPPPSG        | Myelin basic protein                                      | 0,994516894 | 0,218295697 |    |

|     |                |                                                         |             |             |    |
|-----|----------------|---------------------------------------------------------|-------------|-------------|----|
| 672 | VRKRTLRL       | EGF Receptor                                            | 1,914699349 | 0,899632382 |    |
| 673 | SRKSGFGH       | gap junction beta-1 protein                             | 1,680322909 | 0,790897977 |    |
| 674 | LSGESDLEI      | DNA topoisomerase II                                    | 1,456176392 | 0,440419289 |    |
| 675 | PSQRSKYLA      | Myelin basic protein                                    | 0,958259528 | 0,043694691 |    |
| 676 | STDEYLDLS      | Receptor tyrosine kinase                                | 2,462199301 | 1,04654925  |    |
| 677 | TNHIYSNLA      | Mast/stem cell growth factor receptor                   | 0,965081764 | 0,183822313 |    |
| 678 | LSRHSSPHQ      | Glycogen [starch] synthase                              | 1,610652464 | 0,768443796 |    |
| 679 | PTRHSRVAE      | Lamin                                                   | 0,95510916  | 0,16374244  |    |
| 680 | KISITSRKA      | GTP-binding protein era                                 | 1,730033662 | 0,755151918 |    |
| 681 | KSKISASRK      | troponin I                                              | 2,164703038 | 1,122230657 |    |
| 682 | KRKQISVGGL     | Glycogen phosphorylase                                  | 1,539337816 | 0,532305237 |    |
| 683 | SRALSRQLS      | Heat Shock Protein 27                                   | 2,951525238 | 0,817271712 | On |
| 684 | KKKFSFKKP      | MARCKS-related protein                                  | 2,715510034 | 1,267208835 |    |
| 685 | KTRSSRAGL      | Histone H2A                                             | 2,664532731 | 1,275931215 |    |
| 686 | PAPGSPPEP      | Early E1A                                               | 0,994628228 | 0,075957376 |    |
| 687 | IGSESTEDQ      | Alpha-S1 casein                                         | 1,342779462 | 0,058714764 | On |
| 688 | MRRNSFTPL      | fructose-2,6-bisphosphatase                             | 1,416049111 | 0,082838297 | On |
| 689 | EEQEYVQTV      | Annexin I                                               | 1,19306753  | 0,153313815 |    |
| 690 | ERRVSNAGG      | vasodilator-stimulated phosphoprotein                   | 0,803119648 | 0,051608525 |    |
| 691 | IREESPPTS      | Glycoprotein IV                                         | 0,675703935 | 0,074207064 |    |
| 692 | NDSVYANWM      | Probable receptor with tyrosine-protein kinase activity | 1,591173848 | 0,26783601  |    |
| 693 | PYKFPSSPLRIPGZ |                                                         | 0,789165104 | 0,029243922 |    |
| 694 | GRRESLTSF      | inositol 1,4,5-trisphosphate-binding protein            | 1,824735468 | 0,02604184  | On |
| 695 | ARVFSVLRE      | Ser/Thr poetin phosphatase 2B                           | 1,5292169   | 0,195228181 | On |
| 696 | DLPLPSAF       | tristetrapoline                                         | 1,455444083 | 0,156727437 | On |
| 697 | GDKKSKKAK      | Na+/K+ ATPase 1                                         | 1,574915655 | 0,412995621 |    |
| 698 | GSDVSFNEE      | DNA topoisomerase II                                    | 1,691505384 | 0,165023294 | On |
| 699 | EEKGSPLNA      | Protein tyrosine phosphatase 1B                         | 0,726670893 | 0,080461717 |    |
| 700 | ERQKTQTKL      | myosin light chain kinase                               | 1,23846445  | 0,324692795 |    |
| 701 | RRRSSKDTS      | glutamate (NMDA) receptor subunit zeta 3                | 1,254445988 | 0,171470385 |    |
| 702 | SKAGSLGNI      |                                                         | 0,820400896 | 0,146540156 |    |
| 703 | MSGDEM         | eukaryotic translation initiation factor 2 beta         | 0,696646577 | 0,136886934 |    |
| 704 | AAATTPAAE      | neuromodulin                                            | 0,64222244  | 0,174558151 |    |
| 705 | ARKKSSAQL      | ras-related protein rap-1b                              | 1,025068222 | 0,346406025 |    |
| 706 | DKVTSPTKV      | caldesmon                                               | 0,718886524 | 0,09529404  |    |
| 707 | FRRFTPDSL      | Sodium channel protein                                  | 0,88106969  | 0,082789053 |    |
| 708 | RFTDRKDE       | elongation factor 4                                     | 0,82980664  | 0,192659981 |    |
| 709 | RKISASEA       |                                                         | 0,788872406 | 0,139275421 |    |
| 710 | LARASLG        | pyruvate kinase                                         | 1,19566353  | 0,049406622 | On |
| 711 | RRRLSSLRA      | 40S ribosomal protein S6                                | 1,506895183 | 0,057947018 | On |
| 712 | SGYISSLEY      | Complement C1r                                          | 2,17275818  | 0,212600204 | On |
| 713 | LARNSI         | cystic fibrosis transmembrane conductance regulator     | 0,832431537 | 0,117990878 |    |
| 714 | TIAVG          | Photosystem Q(A)                                        | 0,776750436 | 0,046961181 |    |
| 715 | TADISEDEE      | phosphorylcholine transferase                           | 1,836514731 | 0,285516768 | On |
| 716 | TRQTSVSGQ      | synapsins IA and IB                                     | 0,877992556 | 0,137717803 |    |
| 717 | VSEEYDLDR      | Fibroblast growth factor receptor 4                     | 1,932747598 | 0,089735886 | On |
| 718 | REQESSGEE      | Protein phosphatase inhibitor 2                         | 0,93585724  | 0,117762662 |    |
| 719 | GTKRSGSV       | phosphorylase b kinase beta                             | 1,922177165 | 0,232412542 | On |
| 720 | NRLQTMKEE      | Lamin C                                                 | 0,862894771 | 0,049635989 |    |
| 721 | VVELSGESD      | DNA topoisomerase II                                    | 1,569770674 | 0,403575218 |    |
| 722 | SRRPSRATW      | Vitronectin                                             | 2,532442957 | 1,201630907 |    |
| 723 | PASQTPNKT      | Proto-oncogene tyrosine-protein kinase Src              | 0,856390209 | 0,162990082 |    |
| 724 | QDPVSPSLV      | muscarinic acetylcholine receptor M2                    | 1,098605928 | 0,041649524 |    |
| 725 | STTVSKTET      | Rhodopsin                                               | 0,833226902 | 0,114124822 |    |
| 726 | TRKISASEF      |                                                         | 0,922957524 | 0,111644941 |    |
| 727 | PGPQSPGSP      | Neutrophil cytosol factor 4                             | 0,778611096 | 0,025596748 |    |

|     |                |                                                         |             |             |    |
|-----|----------------|---------------------------------------------------------|-------------|-------------|----|
| 728 | KQGSGRGL       | Glycogen phosphorylase                                  | 1,804591549 | 0,31401998  | On |
| 729 | KKSWSRWTL      | parathyroid hormone/parathyroid hormone-related peptide | 2,300401685 | 0,688779341 |    |
| 730 | LASSSKEEN      | Cystatin S                                              | 0,8000767   | 0,084181686 |    |
| 731 | PLRRTLVA       | glycogen synthase                                       | 1,563720435 | 0,029871092 | On |
| 732 | SRPSSNRSY      | vimentin                                                | 2,593337946 | 0,94547061  |    |
| 733 | KNDYYRKRK      | Ros proto-oncogene tyrosine kinase                      | 1,919986025 | 0,501803052 |    |
| 734 | LIEDAEYTA      | Proto-oncogene tyrosine-protein kinase Lck, Fyn, Yes    | 1,41541142  | 0,344286779 |    |
| 735 | QKAQTERKS      | troponin T                                              | 1,325772367 | 0,24678357  |    |
| 736 | ISTESQPNG      | phosphorylase b kinase alpha                            | 0,628922287 | 0,064556709 |    |
| 737 | NGNNYVYID      | Mast/stem cell growth factor receptor                   | 1,09037227  | 0,074759523 |    |
| 738 | EIKKSWSRW      | parathyroid hormone/parathyroid hormone-related peptide | 1,196430578 | 0,350727446 |    |
| 739 | ESPASDEAE      | Nonhistone chromosomal protein HMG-14                   | 1,048016906 | 0,231146107 |    |
| 740 | KRKSSQALV      | Transforming protein erbA                               | 1,393084436 | 0,54330517  |    |
| 741 | NNMPSSDDG      | muscarinic acetylcholine receptor M2                    | 0,694926239 | 0,02710294  |    |
| 742 | PYKFPSSPLRIPGZ |                                                         | 0,754556614 | 0,093456604 |    |
| 743 | GSPGTPGSR      |                                                         | 1,038651802 | 0,231670953 |    |
| 744 | AVVRTPPKS      |                                                         | 1,337652055 | 0,474187148 |    |
| 745 | DRKLSTKEA      | multidrug resistance protein 2                          | 0,762851401 | 0,080104019 |    |
| 746 | GGIRSLNVA      | isocitrate dehydrogenase                                | 0,894695364 | 0,158917234 |    |
| 747 | GTRLRLARM      | glial fibrillary acidic protein                         | 1,647225021 | 0,130329046 | On |
| 748 | EGNKSPAPK      | Actin and myosin binding protein                        | 0,761373628 | 0,009862107 |    |
| 749 | ESHESMESY      | Matrix Gla-protein                                      | 0,967831872 | 0,186038912 |    |
| 750 | RVRISADAM      | Troponin I                                              | 0,724593355 | 0,110593372 |    |
| 751 | SNDDSDDDD      | calsequestrin                                           | 1,47922738  | 0,469057778 |    |
| 752 | RRPTPA         | Protein phosphatase inhibitor 3                         | 1,491790695 | 0,373729057 |    |
| 753 | AEGSSNVFS      | Myosin regulatory light chain 2                         | 0,911435294 | 0,129071704 |    |
| 754 | AVADSESED      | cAMP-dependent protein kinase II (PKA)                  | 1,629958063 | 0,35172648  |    |
| 755 | DNPDYQQDF      | EGF Receptor                                            | 1,842355097 | 0,278645021 | On |
| 756 | GDVKYADIE      | platelet-derived growth factor receptor                 | 0,970876524 | 0,245101481 |    |
| 757 | RLQDYEEKT      | Connection of cytoskeletal structure to plasma membrane | 1,093746002 | 0,207492131 |    |
| 758 | FKKSFKL        | myristolated alanine-rich C-kinase substrate            | 1,552421468 | 0,496122772 |    |
| 759 | LRRPSLG        | pyruvate kinase                                         | 2,420341358 | 0,09644913  | On |
| 760 | RRVRSQEPG      | somatostatin receptor type 4                            | 1,10613423  | 0,214386233 |    |
| 761 | SLDDSGSAM      | alpha-1B adrenergic receptor                            | 0,869592403 | 0,118915221 |    |
| 762 | RRASVA         | pyruvate kinase                                         | 1,77496355  | 0,296012717 | On |
| 763 | ADDEYAPKQ      | Tyrosine-protein kinase Src64B                          | 1,008658699 | 0,273467649 |    |
| 764 | TESQYQQQP      | Tyrosine-protein kinase Hck                             | 0,978966864 | 0,062107767 |    |
| 765 | TVKSSKGGP      | Annexin I                                               | 1,191847864 | 0,211939844 |    |
| 766 | WTSDSAGEE      | 14-3-3 protein tau                                      | 1,569714548 | 0,28943679  |    |
| 767 | RKAASVIAK      | DNA polymerase beta                                     | 1,535419871 | 0,443544891 |    |
| 768 | LRRASLDG       | pyruvate kinase                                         | 1,019640418 | 0,095849834 |    |
| 769 | LRRASGG        | pyruvate kinase                                         | 1,180846967 | 0,250095564 |    |
| 770 | YHTTSHPGT      | Band 3 anion transport protein                          | 1,058890501 | 0,247710168 |    |
| 771 | SSEESITRI      | Beta casein                                             | 1,312602299 | 0,145033489 |    |
| 772 | PLAGSPVIA      | casein kinase II                                        | 0,951203022 | 0,108094457 |    |
| 773 | LGSPLRRR       | vimentin                                                | 3,492761574 | 1,832435604 |    |
| 774 | TEDQYSLVE      | PI3-kinase p85-alpha                                    | 1,948111173 | 0,493114759 |    |
| 775 | TRTYSLGSA      | vimentin                                                | 1,232545812 | 0,292080488 |    |
| 776 | PPSAYATVK      | Annexin II                                              | 0,926022879 | 0,136989028 |    |
| 777 | RTKRSGSV       | phosphorylase b kinase beta                             | 2,283519422 | 0,299422987 | On |
| 778 | KREASLDNQ      | Phytochrome A                                           | 0,838948132 | 0,085946927 |    |
| 779 | LMDKYHVDN      | Early E2A                                               | 0,791104    | 0,065714746 |    |
| 780 | QQGMTVYGL      | calponin alpha and beta                                 | 1,159415176 | 0,115937199 |    |
| 781 | SRSRSRSRS      | Lamin B receptor                                        | 5,298232871 | 1,456185951 | On |
| 782 | KRNSSPPPS      |                                                         | 1,476265427 | 0,359165778 |    |
| 783 | LQRYSSDPT      | EGF Receptor                                            | 0,797535122 | 0,0508823   |    |

|     |                |                                                          |             |             |    |
|-----|----------------|----------------------------------------------------------|-------------|-------------|----|
| 784 | QRRTSLTGS      | Volt.-dep. L-type calcium channel alpha-1S               | 1,590132995 | 0,081250254 | On |
| 785 | GVRQSRASD      | T-cell surface glycoprotein CD3 gamma                    | 0,716421949 | 0,093897002 |    |
| 786 | KRPSNRAKA      | Myelin basic protein                                     | 1,401460567 | 0,540617851 |    |
| 787 | EAVTSPRFI      | Tyrosine 3-monooxygenase                                 | 0,754954119 | 0,054950278 |    |
| 788 | EMTGYVATR      | Mitogen-activated protein kinase p38                     | 0,747762873 | 0,076428181 |    |
| 789 | HKIKSGAEA      | DNA polymerase beta                                      | 0,764551086 | 0,104727564 |    |
| 790 | LARRSTTDA      | Choriogonadotropin beta                                  | 0,829164917 | 0,061776    |    |
| 791 | PYKFPSSPLRIPGZ |                                                          | 0,735284711 | 0,039140069 |    |
| 792 | GGTGTPNKE      | Actin and myosin binding protein                         | 0,572744534 | 0,102172155 |    |
| 793 | ALGISYGRK      | TAT protein                                              | 1,338452245 | 0,423266379 |    |
| 794 | DDSGSAMSG      | alpha-1B adrenergic receptor                             | 0,698262492 | 0,055538915 |    |
| 795 | EYVQTVKSS      | Annexin I                                                | 0,599653004 | 0,013895683 |    |
| 796 | GKTDYMGEA      | Beta-2 adrenergic receptor                               | 0,701116501 | 0,027817813 |    |
| 797 | DSTYYKASK      | Focal adhesion kinase                                    | 1,431366849 | 0,393954212 |    |
| 798 | EKEISDDEA      | Heat Shock Protein 90-beta                               | 0,903654887 | 0,130650555 |    |
| 799 | RRADSLQKN      | iron-responsive element binding protein                  | 0,747610625 | 0,159473755 |    |
| 800 | SAYGSVKAY      | Annexin II                                               | 0,700355778 | 0,008761535 |    |
| 801 | NTSSSPQPK      | p53                                                      | 0,703794043 | 0,114152217 |    |
| 802 | GSRRR          | protamine                                                | 2,263514616 | 1,00611427  |    |
| 803 | AKAKTTKKR      | Myosin regulatory light chain 2                          | 2,645169908 | 1,116337164 |    |
| 804 | DDAYSDTET      | Protein phosphatase inhibitor 2                          | 3,181475816 | 0,767466375 | On |
| 805 | ESVDYVPMML     | platelet-derived growth factor receptor                  | 1,389312432 | 0,244923672 |    |
| 806 | YSTDYREG       | TrkC tyrosine kinase                                     | 1,369368871 | 0,215491709 |    |
| 807 | SPKKSPRKA      | Histone H4                                               | 1,287078087 | 0,467175339 |    |
| 808 | RKRSRKA        | Histone H2B                                              | 1,770313519 | 0,57710378  |    |
| 809 | RPPASPSQP      | synapsins IA and IB                                      | 0,746393576 | 0,021272515 |    |
| 810 | SARLSAKPA      | Nonhistone chromosomal protein HMG-14                    | 0,978879089 | 0,155323233 |    |
| 811 | NRQSSQARV      | Phytochrome A                                            | 1,361786429 | 0,373687948 |    |
| 812 | KEAKSD         | Nonhistone chromosomal protein HMG-14                    | 0,765254196 | 0,045539492 |    |
| 813 | SSSNTIRRP      | fructose-2,6-bisphosphatase                              | 1,877543503 | 0,751045559 |    |
| 814 | TKKQSFKQT      | cystic fibrosis transmembrane conductance regulator      | 1,081581092 | 0,416159652 |    |
| 815 | VDSAYEVIK      | L-lactate dehydrogenase M                                | 1,25838393  | 0,232643    |    |
| 816 | YRKSSLKSR      | spermatid nuclear transition protein 3                   | 2,267035703 | 0,644067756 |    |
| 817 | SNVSSTGSI      |                                                          | 0,835013795 | 0,092024057 |    |
| 818 | RARSRKE        | Histone H2B                                              | 1,501799953 | 0,454909412 |    |
| 819 | VGPGYLGSG      | Probable receptor with tyrosine-protein kinase activity  | 0,740165822 | 0,048050068 |    |
| 820 | QTVKSSKGG      | Annexin I                                                | 0,93557908  | 0,308760612 |    |
| 821 | LRMFSEKAP      | Gamma-aminobutyric-acid receptor gamma-2                 | 1,156912268 | 0,314253129 |    |
| 822 | PRHLSNVSS      |                                                          | 0,672414426 | 0,084384302 |    |
| 823 | SSNEYMDMK      | Mast/stem cell growth factor receptor                    | 0,827565182 | 0,077327239 |    |
| 824 | THYGSLPQK      | Myelin basic protein                                     | 1,082133361 | 0,310941758 |    |
| 825 | LRRPSDQAV      | Transforming protein rel                                 | 0,99370939  | 0,091589463 |    |
| 826 | PRRNSRASL      | Sodium channel protein type II alpha                     | 0,809275535 | 0,233700101 |    |
| 827 | KAKTTKKRP      | Myosin regulatory light chain 2                          | 2,489529432 | 0,960435124 |    |
| 828 | KRPSGRAKA      | Myelin basic protein                                     | 2,177565721 | 0,601583898 |    |
| 829 | PLSKTSLVSSL    | Glycogen [starch] synthase                               | 0,934821708 | 0,080994041 |    |
| 830 | QSGMTEYVA      | Mitogen-activated protein kinase FUS3                    | 1,119574913 | 0,233247787 |    |
| 831 | KGATSDEED      | DNA topoisomerase II                                     | 1,106417712 | 0,12660289  |    |
| 832 | KRRNSEFEI      | tryptophan 5-monooxygenase                               | 1,595596759 | 0,191973642 | On |
| 833 | LTRRASFSAQ     | Regulatory protein ADR1                                  | 3,188356336 | 0,59053846  | On |
| 834 | HRQETVEAL      | calcium/calmodulin-dependent protein kinase type II beta | 0,727051865 | 0,056956608 |    |
| 835 | LRRFSLATM      | Cytochrome P450 2B1                                      | 1,743186073 | 0,240645753 | On |
| 836 | EEEAYGWMD      | Gastrin                                                  | 1,750705196 | 0,376913951 |    |
| 837 | EQESSGEED      | Protein phosphatase inhibitor 2                          | 1,12728235  | 0,104656665 |    |
| 838 | IAADSEAEQ      | Insulin receptor substrate 7                             | 1,017723706 | 0,091531888 |    |
| 839 | MGEASGAQL      | Beta-2 adrenergic receptor                               | 0,666379746 | 0,02941904  |    |

|     |                |                                                         |             |             |    |
|-----|----------------|---------------------------------------------------------|-------------|-------------|----|
| 840 | PYKFPSSPLRIPGZ |                                                         | 0,665372965 | 0,080703667 |    |
| 841 | GNGDYMPMS      | Insulin receptor substrate 8                            | 0,721838394 | 0,096161543 |    |
| 842 | APRYPGGRR      | Myelin basic protein                                    | 2,019754803 | 0,711336744 |    |
| 843 | DGNKSPAPK      | caldesmon                                               | 0,917546942 | 0,0755187   |    |
| 844 | FMTEYVATR      | mitogen-activated protein kinase                        | 0,800228685 | 0,094209826 |    |
| 845 | GRASSHSSQ      | Lamin C                                                 | 1,39629878  | 0,347501864 |    |
| 846 | EDSTYYKAS      | Focal adhesion kinase                                   | 1,708408981 | 0,355574729 |    |
| 847 | ENPQYFRQG      | TrkC tyrosine kinase                                    | 0,796529278 | 0,166395875 |    |
| 848 | RRPTPATVA      | Protein phosphatase inhibitor 4                         | 1,044926323 | 0,177308812 |    |
| 849 | SFKLSGFSF      | myristolated alanine-rich C-kinase substrate            | 0,849208147 | 0,050256065 |    |
| 850 | QEKESERLA      | Beta-2 adrenergic receptor                              | 0,812917431 | 0,097173588 |    |
| 851 | RRVSV          | pyruvate kinase                                         | 1,784357335 | 0,250036293 | On |
| 852 | APFTPGGRR      | Myelin basic protein                                    | 1,501992173 | 0,352386115 |    |
| 853 | DEKLSEILG      | RNA polymerase alpha                                    | 1,030391651 | 0,070053233 |    |
| 854 | FGHNTIDAV      | bumetanide-sensitive sodium-(potassium)-chloride cotran | 0,852891614 | 0,134362168 |    |
| 855 | RDEEYGYEA      | Gamma-aminobutyric-acid receptor gamma-2                | 2,527916921 | 0,502396192 | On |
| 856 | AVRRSDAA       | Troponin I                                              | 1,056729604 | 0,107440531 |    |
| 857 | TKRSGSV        | phosphorylase b kinase beta                             | 1,410515526 | 0,048390555 | On |
| 858 | RRKATQVGE      | vasodilator-stimulated phosphoprotein                   | 0,849390969 | 0,120615478 |    |
| 859 | SEGDSSEGE      | Serum response factor                                   | 1,313903571 | 0,576833168 |    |
| 860 | PLDRSSHAQ      | Insulin Receptor (IR)                                   | 1,032753344 | 0,119247635 |    |
| 861 | RRASS          | pyruvate kinase                                         | 1,608450943 | 0,214066884 | On |
| 862 | STPLSPTRI      | Lamin A/C                                               | 1,218848786 | 0,120200048 |    |
| 863 | TPPLSPSRR      | Myc proto-oncogene protein                              | 2,444324248 | 0,826508147 |    |
| 864 | VKRISGLIY      | Histone H4                                              | 1,348763256 | 0,114971108 | On |
| 865 | RAAASRARQ      | cAMP response element-binding protein CRE-BP3           | 1,936390448 | 0,468398936 |    |
| 866 | SPRTPGGRR      | Myelin basic protein                                    | 1,973716333 | 0,51307583  |    |
| 867 | RRRRSVA        | pyruvate kinase                                         | 2,621219819 | 0,713380089 | On |
| 868 | VRFESIRLP      | Choriogonadotropin beta                                 | 1,414994454 | 0,119416507 | On |
| 869 | SRKESYSVY      | Histone H2B                                             | 0,959473832 | 0,073963762 |    |
| 870 | LSELSRRRI      | eukaryotic translation initiation factor 4F             | 2,983640767 | 1,273949017 |    |
| 871 | PSPSSRVTV      | Lamin B1                                                | 1,206300062 | 0,175015299 |    |
| 872 | SSVPTPSPL      | casein kinase II                                        | 0,817331217 | 0,19700835  |    |
| 873 | TNEEYLDLS      | Fibroblast growth factor receptor 2                     | 1,626787315 | 0,238624826 | On |
| 874 | LSRFSWGAE      | Myelin basic protein                                    | 1,0286144   | 0,215735032 |    |
| 875 | PTKRSPTKR      | Histone H2B.1                                           | 1,481643212 | 0,209967144 |    |
| 876 | KISASRKLQ      | troponin I                                              | 1,936066613 | 0,498862971 |    |
| 877 | KSFGSPNRI      | cell division protein kinase 7                          | 1,550950657 | 0,261510552 |    |
| 878 | KRKQISVAGL     | Glycogen phosphorylase                                  | 1,650195583 | 0,357578564 |    |
| 879 | SQHSTPPKK      | Large T antigen                                         | 1,20034589  | 0,102238473 |    |
| 880 | KKIDSFASN      | acetyl-CoA carboxylase                                  | 1,01755655  | 0,095983314 |    |
| 881 | KTETSQVAP      | Rhodopsin                                               | 0,908917928 | 0,211092676 |    |
| 882 | PAAPSPGSS      | synapsins IA and IB                                     | 1,055464813 | 0,136689034 |    |
| 883 | IGRFSEPHA      | cGMP-dependent protein kinase (PKG)                     | 0,856166151 | 0,138301436 |    |
| 884 | MQLKSEIKQ      | phosphorylase b kinase alpha                            | 0,939458592 | 0,078583216 |    |
| 885 | EEQEYIKTV      | Annexin I                                               | 1,706104589 | 0,432984118 |    |
| 886 | ERRPSNVSQ      | Sodium channel protein type II alpha                    | 0,880144955 | 0,070115346 |    |
| 887 | IPPHTPVRT      | Retinoblastoma-associated protein                       | 1,427505282 | 0,251067315 |    |
| 888 | NDSTSVSAV      | muscarinic acetylcholine receptor M2                    | 0,913500884 | 0,16576176  |    |
| 889 | PYKFPSSPLRIPGZ |                                                         | 0,693836634 | 0,077992619 |    |
| 890 | GRPITPPRN      | ser/thr protein phosphatase PP1-alpha                   | 1,569913757 | 0,244354683 |    |
| 891 | ARTKRSGSV      | phosphorylase b kinase beta                             | 2,453129084 | 0,376760506 | On |
| 892 | DLPGTEDFV      | Beta-2 adrenergic receptor                              | 1,87169207  | 0,463374495 |    |
| 893 | GALYSGSEG      | Serum response factor                                   | 1,143315965 | 0,222268761 |    |
| 894 | GRVLTLP RS     | Insulin Receptor (IR)                                   | 1,917389866 | 0,219075411 | On |
| 895 | EKESSNDS       | muscarinic acetylcholine receptor M2                    | 0,903316195 | 0,163086214 |    |



|     |                |                                                          |             |             |    |
|-----|----------------|----------------------------------------------------------|-------------|-------------|----|
| 896 | ERNLSFEIK      | protein-tyrosine phosphatase G1                          | 0,894264992 | 0,097882003 |    |
| 897 | RRRRSRRAS      | Protamine Z                                              | 2,157480718 | 0,894881322 |    |
| 898 | SIYSSDDDE      | Myb proto-oncogene protein                               | 2,457135897 | 0,223091707 | On |
| 899 | HGYSLG         | Lysozyme C                                               | 0,910320884 | 0,194246792 |    |
| 900 | AAASFKAQR      |                                                          | 1,846497178 | 0,316286213 | On |
| 901 | ARKFSSARP      | Sodium channel protein                                   | 1,874566122 | 0,238927022 | On |
| 902 | DKEYYSVHN      | Receptor tyrosine kinase for hepatocyte growth factor    | 1,142842534 | 0,01061963  | On |
| 903 | FRKLSFTES      |                                                          | 1,195523689 | 0,175230129 |    |
| 904 | RFHKSSKDS      | myelin                                                   | 0,904170565 | 0,216515222 |    |
| 905 | RAKRSGSV       | phosphorylase b kinase beta                              | 2,624819508 | 0,46204844  | On |
| 906 | KSESSQK        | 40S ribosomal protein S6                                 | 0,936176322 | 0,094463881 |    |
| 907 | RRRLSDSNF      | synapsins                                                | 1,017734407 | 0,142690878 |    |
| 908 | SGKTSPSSS      | phosphorylcholine transferase                            | 0,825308613 | 0,12360679  |    |
| 909 | KSRRTI         | Interleukin-2 receptor alpha                             | 1,39288932  | 0,409674043 |    |
| 910 | TAILE          | Photosystem Q(B)                                         | 0,826348503 | 0,066489745 |    |
| 911 | SYPLSPLSD      | Cytosolic phospholipase A2                               | 1,822744258 | 0,119633652 | On |
| 912 | TRQASQAGP      | synapsins IA and IB                                      | 0,931614291 | 0,197791138 |    |
| 913 | VRVYTHEVV      | cell division control protein 2                          | 0,951960369 | 0,089110161 |    |
| 914 | RENEYMPMA      | Middle T antigen                                         | 0,845839713 | 0,10647904  |    |
| 915 | GRGLSLSR       | Myelin basic protein                                     | 2,850271663 | 0,479792932 | On |
| 916 | YIYGSFK        |                                                          | 1,221516294 | 0,100481877 |    |
| 917 | VTRSSAVRL      | vimentin                                                 | 1,92170945  | 0,298241277 | On |
| 918 | SRRLSQETG      | cystic fibrosis transmembrane conductance regulator      | 0,920555412 | 0,172503404 |    |
| 919 | PASPSPQRQ      | synapsins IA and IB                                      | 0,926847455 | 0,122532026 |    |
| 920 | PWRITDNEL      | bumetanide-sensitive sodium-(potassium)-chloride cotran: | 1,454393552 | 0,233940207 |    |
| 921 | STSVSAVAS      | muscarinic acetylcholine receptor M2                     | 0,93421088  | 0,08122044  |    |
| 922 | TRIPSAKKY      | astrocytic phosphoprotein PEA-15                         | 1,581696741 | 0,414867913 |    |
| 923 | PGGSTPVSS      | casein kinase II                                         | 0,762355854 | 0,153319243 |    |
| 924 | QGTLKIFK       | Myelin basic protein                                     | 1,374061146 | 0,306847146 |    |
| 925 | KKRLSVERI      | DNA topoisomerase II alpha                               | 1,874844251 | 0,60427006  |    |
| 926 | KYRKSSLKS      | spermatid nuclear transition protein 4                   | 2,099143478 | 0,559251745 |    |
| 927 | PLSRRLSVA      | glycogen synthase                                        | 1,359100512 | 0,34634499  |    |
| 928 | SRLHSVRER      | sucrose synthase 2                                       | 2,713557209 | 0,580947092 | On |
| 929 | KNDKSKTWQ      | eukaryotic translation initiation factor 4E              | 1,305516683 | 0,327950359 |    |
| 930 | LGGGTFDIS      | Heat Shock Protein 70                                    | 1,114255337 | 0,407685484 |    |
| 931 | QHLKSVMLQ      | Troponin I                                               | 1,104191667 | 0,333008    |    |
| 932 | ISQESSEEE      | high mobility group protein                              | 1,457915537 | 0,24169946  |    |
| 933 | NGDASPAAA      | myristolated alanine-rich C-kinase substrate (MARCKS)    | 0,618180202 | 0,115761277 |    |
| 934 | EHVSSSEES      | Alpha-S2 casein                                          | 0,694168377 | 0,022631937 |    |
| 935 | ESMESYEVS      | Matrix Gla-protein                                       | 1,815053507 | 0,38080679  |    |
| 936 | KQLASFEIY      | Cystatin S                                               | 0,740416692 | 0,058623388 |    |
| 937 | NMPSSDDGL      | muscarinic acetylcholine receptor M2                     | 0,871478081 | 0,074607048 |    |
| 938 | PYKFPSSPLRIPGZ |                                                          | 0,621238158 | 0,048054212 |    |
| 939 | GSLKSRKRA      | spermatid nuclear transition protein 1                   | 2,887504044 | 0,793626725 | On |
| 940 | AVRRSDRAY      | Troponin I                                               | 1,513528265 | 0,365651362 |    |
| 941 | DPTMSKSKK      | eukaryotic translation initiation factor 2 beta          | 1,562424633 | 0,401245861 |    |
| 942 | GGGTSPVFP      | Desmin                                                   | 0,726800975 | 0,036862198 |    |
| 943 | GSTSTPAPS      | ATP-citrate (pro-S-) lyase                               | 0,451699428 | 0,128937847 |    |
| 944 | EGGRTVGAG      | Elongation factor Tu-A and B                             | 0,517258667 | 0,067019539 |    |
| 945 | ESHESLESY      | Matrix Gla-protein                                       | 1,281269199 | 0,109577498 |    |
| 946 | RVLESFRAA      | voltage-gated potassium channel                          | 2,053019779 | 0,256160519 | On |
| 947 | SMANSFVGT      | mitogen-activated protein kinase kinase 1                | 0,897525875 | 0,103019253 |    |
| 948 | RRPSPA         | pyruvate kinase                                          | 1,424452643 | 0,154965899 | On |
| 949 | ADSFSLNDA      | galectin-3                                               | 1,265670193 | 0,199157418 |    |
| 950 | ATSASPPQK      | p53                                                      | 0,685160884 | 0,0852422   |    |
| 951 | DNLYYWDQD      | Receptor tyrosine-protein kinase erbB-2                  | 1,686905207 | 0,031700183 | On |



|      |                |                                                 |             |             |    |
|------|----------------|-------------------------------------------------|-------------|-------------|----|
| 952  | GDSSYKNIH      | macrophage colony stimulating factor 1 receptor | 0,821910046 | 0,076166558 |    |
| 953  | RKRLSQDAY      | Neutrophil cytosol factor 6                     | 0,857539273 | 0,12236736  |    |
| 954  | ASGSFKL        | Histone H1.1                                    | 0,86766128  | 0,121511894 |    |
| 955  | LRRGSLG        | pyruvate kinase                                 | 2,461977903 | 0,657139404 | On |
| 956  | RRSVSEAAL      | hormone sensitive lipase                        | 0,734567177 | 0,123432958 |    |
| 957  | SLAMSPRQR      | Protein phosphatase inhibitor 5                 | 0,899741972 | 0,275736668 |    |
| 958  | RRASLG         |                                                 | 2,147017141 | 0,460972592 | On |
| 959  | AAVDTSEI       | Prothymosin                                     | 1,252530985 | 0,303896131 |    |
| 960  | TESQSLTLT      | Beta casein                                     | 0,898123193 | 0,114802523 |    |
| 961  | TTRVTPLRT      | Desmin                                          | 1,886765981 | 0,343111694 | On |
| 962  | WTADSGEGD      | Fibrinogen alpha                                | 1,608853466 | 0,332073338 |    |
| 963  | RHRDTGILD      | Myelin basic protein                            | 0,727091731 | 0,107824966 |    |
| 964  | NRIYTHQVV      | cell division protein kinase 7                  | 1,215715444 | 0,259287049 |    |
| 965  | LRKASLG        | pyruvate kinase                                 | 0,912275647 | 0,034361072 |    |
| 966  | YHGHSMSDP      | pyruvate dehydrogenase E1                       | 0,663842247 | 0,007576253 |    |
| 967  | SSEESIISQ      | Alpha-S2 casein                                 | 1,00857862  | 0,189666071 |    |
| 968  | PKRGSKGKD      | Myelin basic protein                            | 0,977435928 | 0,023658247 |    |
| 969  | LGSALRRR       | vimentin                                        | 4,711790179 | 1,207213621 | On |
| 970  | TDESDNEI       | lower matrix phosphoprotein                     | 2,165015405 | 0,100210866 | On |
| 971  | TRSVSSSSY      | vimentin                                        | 1,376182884 | 0,185769394 |    |
| 972  | PPRRSSIRN      | Neutrophil cytosol factor 7                     | 4,262225243 | 1,07353579  | On |
| 973  | RTKGSQSV       | phosphorylase b kinase beta                     | 1,746458224 | 0,360248795 |    |
| 974  | KRAASPRKS      | Histone H5                                      | 2,22107732  | 0,692032737 |    |
| 975  | LMAPSEEDH      | insulin-like growth factor binding protein 2    | 0,923782454 | 0,093456614 |    |
| 976  | QNPVYHNQP      | EGF Receptor                                    | 1,070070183 | 0,173603226 |    |
| 977  | SRSRSRSPG      | Lamin B receptor                                | 4,598282357 | 1,433548106 | On |
| 978  | KRKVSSAEG      | Nonhistone chromosomal protein HMG-14           | 1,403259819 | 0,323843626 |    |
| 979  | LQDDYEDMM      | Band 3 anion transport protein                  | 1,497342875 | 0,509561452 |    |
| 980  | QRRSSEGST      | Volt.-dep. L-type calcium channel alpha-1S      | 0,677107639 | 0,03277791  |    |
| 981  | GVLRRASVA      | pyruvate kinase                                 | 1,865438707 | 0,111341084 | On |
| 982  | KRPSLRAKA      | Myelin basic protein                            | 2,408580127 | 0,684973682 |    |
| 983  | EASTTVSKT      | Rhodopsin                                       | 0,892605079 | 0,25112516  |    |
| 984  | ELSNYIAMG      | Insulin receptor substrate 9                    | 0,727700133 | 0,099825582 |    |
| 985  | HHHATPSPP      | Myb proto-oncogene protein                      | 0,801170087 | 0,139429232 |    |
| 986  | KTETSQVAP      | Rhodopsin                                       | 0,690629196 | 0,096662063 |    |
| 987  | PYKFPSSPLRIPGZ |                                                 | 0,928336253 | 0,200067776 |    |
| 988  | GGSVTKKRK      | Lamin C                                         | 1,559294578 | 0,756658504 |    |
| 989  | AKRISGKMA      | cell division control protein 2                 | 1,337581226 | 0,225891607 |    |
| 990  | DDPSYVNVQ      | Adaptor molecule SHC                            | 1,030159696 | 0,145021899 |    |
| 991  | EVEKSPVKS      | neurofilament triplet M                         | 0,764289681 | 0,117356712 |    |
| 992  | GKSSSYSKQ      | Fibrinogen alpha                                | 1,245111404 | 0,327916285 |    |
| 993  | DSRSSLIRK      | multidrug resistance protein 3                  | 1,684085453 | 0,148154562 | On |
| 994  | EKAKSPVPK      | neurofilament triplet M                         | 1,104695656 | 0,196873519 |    |
| 995  | RQRKSRTTI      | Interleukin-2 receptor alpha                    | 1,690925543 | 0,414325807 |    |
| 996  | SAYATVKAY      | Annexin II                                      | 0,795663047 | 0,167238851 |    |
| 997  | NTDGSTDYG      | Lysozyme C                                      | 1,43353429  | 0,804384708 |    |
| 998  | KRTLRL         | EGF Receptor                                    | 1,78216732  | 0,674125201 |    |
| 999  | AGPTSARDG      | RNA polymerase alpha                            | 0,688295764 | 0,100460544 |    |
| 1000 | DAPDPELL       | Tyrosine-protein kinase Dash/Abl                | 1,13903378  | 0,149567872 |    |
| 1001 | ESSYSYEEI      | RNA polymerase alpha                            | 1,593712634 | 0,287977615 |    |
| 1002 | YSLGSALRP      | vimentin                                        | 0,796991369 | 0,143534683 |    |
| 1003 | SPHQSEDEE      | Glycogen [starch] synthase                      | 0,759329099 | 0,100173488 |    |
| 1004 | RKRRAE         | Histone H2B                                     | 1,119809604 | 0,109760978 |    |
| 1005 | RNASTNDSP      | Beta-2 adrenergic receptor                      | 0,72342529  | 0,114610807 |    |
| 1006 | SAELYSNAL      | platelet-derived growth factor receptor         | 0,951194642 | 0,270920025 |    |
| 1007 | NRQLSSGVS      | Heat Shock Protein 28                           | 0,99946894  | 0,107554503 |    |

|      |                |                                                           |             |             |    |
|------|----------------|-----------------------------------------------------------|-------------|-------------|----|
| 1008 | VGPDS          | p53                                                       | 1,091321121 | 0,278114628 |    |
| 1009 | SSSEGAPE       | Clathrin light chain B                                    | 0,598864403 | 0,112584333 |    |
| 1010 | TKHIYNLA       | Mast/stem cell growth factor receptor                     | 0,7864908   | 0,031498668 |    |
| 1011 | VDEMYREAP      | Myosin regulatory light chain 4                           | 0,637001138 | 0,202881919 |    |
| 1012 | YRKGLSKSR      | spermatid nuclear transition protein 1                    | 1,250534739 | 0,060661805 | On |
| 1013 | SNQEYLDLS      | Receptor tyrosine kinase                                  | 1,218125714 | 0,231919043 |    |
| 1014 | RKISASE        | cGMP-specific phosphodiesterase 3a                        | 0,839559926 | 0,143452714 |    |
| 1015 | VGFMEYVA       | mitogen-activated protein kinase 1                        | 0,933721697 | 0,064769912 |    |
| 1016 | QTASSPLSP      | Lamin                                                     | 0,559113542 | 0,222567828 |    |
| 1017 | LRKVKQEE       | vasodilator-stimulated phosphoprotein                     | 0,74688433  | 0,166958411 |    |
| 1018 | PQRATSNVF      | Myosin regulatory light chain 6                           | 0,745084098 | 0,172833091 |    |
| 1019 | SSNDSTSVS      | muscarinic acetylcholine receptor M2                      | 0,80496081  | 0,091205342 |    |
| 1020 | THVASVSDV      | acetyl-CoA carboxylase                                    | 0,766699614 | 0,063637716 |    |
| 1021 | LRLSTKYR       | protein-tyrosine phosphatase G1                           | 2,435468803 | 0,809938746 |    |
| 1022 | PRRDSTEGF      | fructose-1,6-bisphosphatase                               | 1,206129828 | 0,109557369 |    |
| 1023 | KAEEYILKK      | Acetylcholine receptor protein gamma                      | 0,761380989 | 0,120070225 |    |
| 1024 | KRPSFRAKA      | Myelin basic protein                                      | 2,570435268 | 0,703252712 | On |
| 1025 | PTPSAPSPQPKG   | Tyrosine 3-monooxygenase                                  | 0,777133587 | 0,240485258 |    |
| 1026 | QRYSSDPTG      | EGF Receptor                                              | 0,688624853 | 0,118768942 |    |
| 1027 | KEDTYTAHA      | Tyrosine-protein kinase abl-1                             | 0,723880404 | 0,032670238 |    |
| 1028 | KRRLSFSET      | Interleukin-1 alpha                                       | 1,428171868 | 0,286808996 |    |
| 1029 | KRAKAKTTKRR    | Myosin regulatory light chain 2                           | 3,856827319 | 1,691633628 |    |
| 1030 | HRQETVDAL      | calcium/calmodulin-dependent protein kinase type II alpha | 0,873206705 | 0,17930211  |    |
| 1031 | LNRMSFASN      | acetyl-CoA carboxylase                                    | 0,992158496 | 0,192133282 |    |
| 1032 | EEDTYTMPS      | Focal adhesion kinase                                     | 1,355501494 | 0,256244948 |    |
| 1033 | EQEYEDPD       | Band 3 anion transport protein                            | 1,459311152 | 0,268831789 |    |
| 1034 | HVSSSEESI      | Alpha-S2 casein                                           | 0,727950656 | 0,303889607 |    |
| 1035 | METPSQRRRA     | Lamin C                                                   | 1,281562248 | 0,228582012 |    |
| 1036 | PYKFPSSPLRIPGZ |                                                           | 0,930563989 | 0,073345664 |    |
| 1037 | GNFNYVEFT      | Myosin regulatory light chain 2                           | 1,360311432 | 0,12637454  | On |
| 1038 | APRTPGGRR      | Myelin basic protein                                      | 2,102330828 | 0,72177492  |    |
| 1039 | DGNGYISAA      | Calmodulin                                                | 1,058431736 | 0,138004608 |    |
| 1040 | FLTEYVATR      | extracellular signal-regulated kinase 2                   | 0,919338795 | 0,035173301 |    |
| 1041 | GRALSTRAQ      | Troponin I                                                | 1,761091532 | 0,089412508 | On |
| 1042 | EDRMSLVNS      | Cystatin S                                                | 0,644935695 | 0,255716037 |    |
| 1043 | ENPEYLGLD      | Receptor tyrosine-protein kinase erbB-2                   | 1,564916695 | 0,274467472 |    |
| 1044 | RRLSSLRAS      | 40S ribosomal protein S6                                  | 2,869648855 | 0,766196254 | On |
| 1045 | SFKKSFKLS      | myristolated alanine-rich C-kinase substrate (MARCKS)     | 1,776900924 | 0,487298678 |    |
| 1046 | PSKKYAIKG      | Glutamyl aminopeptidase                                   | 0,92919746  | 0,126917301 |    |
| 1047 | RRPSV          | pyruvate kinase                                           | 1,573462892 | 0,176114825 | On |
| 1048 | APETPGGRR      | Myelin basic protein                                      | 1,459350851 | 0,291476576 |    |
| 1049 | DEEMSETAD      | Protein phosphatase inhibitor 2                           | 1,165297233 | 0,170592269 |    |
| 1050 | FFSSSEGA       | Clathrin light chain B                                    | 0,671979102 | 0,248393402 |    |
| 1051 | RDDTYTAHA      | Tyrosine-protein kinase Dash/Abl                          | 0,882755842 | 0,081429756 |    |
| 1052 | APTPGGRR       | Myelin basic protein                                      | 1,449369305 | 0,730318992 |    |
| 1053 | STNDSPL        | Beta-2 adrenergic receptor                                | 0,75607726  | 0,251627569 |    |
| 1054 | RRKASGPPV      | Histone H1.1                                              | 1,206253729 | 0,204003532 |    |
| 1055 | SEENSKKTV      | Alpha-S2 casein                                           | 0,710453032 | 0,119791507 |    |
| 1056 | PASPSPQRQ      | synapsins IA and IB                                       | 1,039461945 | 0,167877118 |    |
| 1057 | RRASR          | pyruvate kinase                                           | 1,924514052 | 0,597056444 |    |
| 1058 | STNEYMDMK      | Mast/stem cell growth factor receptor                     | 0,839178704 | 0,102965608 |    |
| 1059 | TPPLSPIDM      | Transcription factor AP-5                                 | 0,825976273 | 0,155947731 |    |
| 1060 | VKGATSDEE      | DNA topoisomerase II                                      | 0,878938433 | 0,090436025 |    |
| 1061 | QRATSNVFA      | Myosin regulatory light chain 5                           | 0,819703606 | 0,108240126 |    |
| 1062 | SPRKSPRKS      | Histone H6                                                | 2,015079866 | 0,639715827 |    |
| 1063 | RRRASVA        | pyruvate kinase                                           | 2,011958658 | 0,51086529  |    |

|      |                |                                                         |             |             |    |
|------|----------------|---------------------------------------------------------|-------------|-------------|----|
| 1064 | VTPSPPLGP      | casein kinase II                                        | 0,848000999 | 0,046416692 |    |
| 1065 | SRKDSLDDDS     | alpha-1B adrenergic receptor                            | 1,036401769 | 0,088868088 |    |
| 1066 | LSEHSSPEE      | Dopamine- and cAMP-regulated neuronal phosphoprotein    | 0,837465154 | 0,065254068 |    |
| 1067 | PSPKYPGPQ      | Chromogranin A                                          | 0,826987039 | 0,059657687 |    |
| 1068 | SSVLYTAVQ      | platelet-derived growth factor receptor                 | 0,89957748  | 0,037330316 |    |
| 1069 | TLSDSDDED      | N-myc proto-oncogene protein                            | 1,791513799 | 0,160455924 | On |
| 1070 | LSLDSQGRN      | Beta-2 adrenergic receptor                              | 0,936189522 | 0,062545701 |    |
| 1071 | PTKRSPQKG      | Histone H2B.1                                           | 0,917265854 | 0,098479267 |    |
| 1072 | KIQASFRGH      | neurogranin                                             | 2,358940615 | 0,653897627 |    |
| 1073 | KRSNSVDTS      | Glycogen [starch] synthase                              | 1,115986442 | 0,101773755 |    |
| 1074 | KRKQISGRGL     | Glycogen phosphorylase                                  | 1,271417839 | 0,338563098 |    |
| 1075 | SQESSEEEQ      | high mobility group protein                             | 0,874830342 | 0,340260994 |    |
| 1076 | KKDVTVPKA      | Histone H1                                              | 1,444322984 | 0,338989647 |    |
| 1077 | KSRWSGSQQ      | RAF proto-oncogene ser/thr-protein kinase               | 1,632192407 | 0,507466081 |    |
| 1078 | LYSGSEGDS      | Serum response factor                                   | 1,718904311 | 0,067598693 | On |
| 1079 | IGHHSTSD       | 2-oxoisovalerate dehydrogenase alpha                    | 0,836331795 | 0,180114187 |    |
| 1080 | MPGETPPLS      | Transcription factor AP-3                               | 0,90314566  | 0,105944363 |    |
| 1081 | EFPVYEAP       | Hematopoietic cell-specific LYN substrate               | 2,067512273 | 0,768193488 |    |
| 1082 | ERRNSILTE      | cystic fibrosis transmembrane conductance regulator     | 0,90330554  | 0,293898165 |    |
| 1083 | INETSQHHD      | vimentin                                                | 0,720956784 | 0,067516467 |    |
| 1084 | NDSNYVVKG      | Mast/stem cell growth factor receptor                   | 0,800488046 | 0,093806334 |    |
| 1085 | PYKFPSSPLRIPGZ |                                                         | 0,691515823 | 0,103500371 |    |
| 1086 | GRNASTNDS      | Beta-2 adrenergic receptor                              | 0,805755798 | 0,070007561 |    |
| 1087 | ARSGSSTYS      | parathyroid hormone/parathyroid hormone-related peptide | 1,641618597 | 0,314096892 |    |
| 1088 | DLTSPDVG       | Transcription factor AP-4                               | 1,093308336 | 0,015837917 | On |
| 1089 | GAGNSLRTA      | Lamin C                                                 | 1,402609703 | 0,216360153 |    |
| 1090 | GRTWTLAGT      | cGMP-dependent protein kinase (PKG)                     | 1,001494435 | 0,069748106 |    |
| 1091 | EEHVYSFPN      | Paxillin                                                | 0,97946003  | 0,068885842 |    |
| 1092 | ERHHSIDAQ      | phosphoenolpyruvate carboxylase                         | 0,786668252 | 0,043049745 |    |
| 1093 | RRRRAASVA      | pyruvate kinase                                         | 2,338103219 | 0,747375473 |    |
| 1094 | SIRDTPAKN      | Nucleophosmin                                           | 0,897299276 | 0,010711782 |    |
| 1095 | GGYSLG         | Lysozyme C                                              | 1,084996371 | 0,245369024 |    |
| 1096 | AAASFKAKK      |                                                         | 1,479434355 | 0,365113304 |    |
| 1097 | ARDIYKNDY      | Ros proto-oncogene tyrosine kinase                      | 1,152685821 | 0,131190803 |    |
| 1098 | DKEVSDDEA      | HSP90-alpha                                             | 1,170347631 | 0,279097962 |    |
| 1099 | FRKFTKSER      | cGMP-dependent protein kinase (PKG)                     | 2,362493852 | 0,490891868 | On |
| 1100 | RFFGSDRGA      | Myelin basic protein                                    | 1,685005893 | 0,105283601 | On |
| 1101 | PRTPGGRR       | Myelin basic protein                                    | 1,118111483 | 0,579940121 |    |
| 1102 | KRRVSEV        | Erythrodihydroneopterin triphosphate synthetase         | 1,403708018 | 0,265328253 |    |
| 1103 | RRRGSSIPQ      | 6-phosphofructo-2-kinase/fructose-2,6-bisphosphatase    | 1,701120737 | 0,24366805  | On |
| 1104 | SGDTSRPHL      | Microtubule-associated protein tau                      | 1,110389081 | 0,133899958 |    |
| 1105 | KQITVR         | Glycogen phosphorylase                                  | 1,577602777 | 0,29308658  |    |
| 1106 | SSKRA          | Myosin regulatory light chain 2                         | 1,810295976 | 0,41241782  |    |
| 1107 | SVSSSSYRR      | vimentin                                                | 3,217074058 | 1,103102773 |    |
| 1108 | TRQASISGP      | synapsins                                               | 1,17304874  | 0,064669307 |    |
| 1109 | VRTYTHEVV      | Cell division protein kinase 2                          | 1,022082316 | 0,056044466 |    |
| 1110 | REILSRRPS      | cAMP response element binding protein                   | 2,773847073 | 0,517894266 | On |
| 1111 | GASGSFKL       | Histone H1.1                                            | 1,186375301 | 0,178927479 |    |
| 1112 | VRRSDRA        | Troponin I                                              | 1,41583407  | 0,400237893 |    |
| 1113 | VTRRTLSDM      | 6-phosphofructokinase                                   | 1,799962253 | 0,317504578 | On |
| 1114 | SRRGSESSE      | phosphoprotein phosphatase 1, 3a                        | 1,282453235 | 0,102044203 | On |
| 1115 | PASAYGSVK      | Annexin II                                              | 0,992048101 | 0,075848859 |    |
| 1116 | PWQVSLRTR      | Plasminogen                                             | 1,117752449 | 0,12439957  |    |
| 1117 | STSRSLYSS      | vimentin                                                | 3,333301385 | 0,581876943 | On |
| 1118 | TRGGSLERS      | alpha-1B adrenergic receptor                            | 1,379041987 | 0,049981125 | On |
| 1119 | PFKLSGLSF      | MARCKS-related protein                                  | 0,970244037 | 0,078953691 |    |

|      |                |                                                       |             |             |    |
|------|----------------|-------------------------------------------------------|-------------|-------------|----|
| 1120 | QEQEYVQAV      | Annexin I                                             | 0,996338734 | 0,046586285 |    |
| 1121 | KKRFSFKKS      | myristolated alanine-rich C-kinase substrate (MARCKS) | 3,42517181  | 1,512182082 |    |
| 1122 | KYLASASTM      | Myelin basic protein                                  | 1,300769429 | 0,40177023  |    |
| 1123 | PRRVSRRRR      | Protamine YII                                         | 1,249388121 | 0,15447338  |    |
| 1124 | SRKRSGEAT      | 6-phosphofructokinase                                 | 1,048491689 | 0,127821427 |    |
| 1125 | KMKDSDSEE      | Calmodulin                                            | 0,986228983 | 0,035781767 |    |
| 1126 | LFRLSEHSS      | Dopamine- and cAMP-regulated neuronal phosphoprotein  | 0,851251512 | 0,050872581 |    |
| 1127 | QDENTVSTS      | muscarinic acetylcholine receptor M2                  | 1,009349203 | 0,171842072 |    |
| 1128 | ISITSRKAQ      | GTP-binding protein era                               | 0,959204712 | 0,219805273 |    |
| 1129 | NFLKTSAGS      | Carbon catabolite derepressing protein kinase         | 0,751130547 | 0,089916317 |    |
| 1130 | EHIPYTHMN      | Insulin Receptor (IR)                                 | 0,966128042 | 0,268964764 |    |
| 1131 | ESMESYELN      | Matrix Gla-protein                                    | 1,491758437 | 0,216779595 |    |
| 1132 | KKRFSFKKS      | myristolated alanine-rich C-kinase substrate (MARCKS) | 3,145188801 | 0,920855899 | On |
| 1133 | NKQGYKARQ      | Protein kinase C delta                                | 1,306606545 | 0,219422967 |    |
| 1134 | PYKFPSSPLRIPGZ |                                                       | 0,592932    | 0,059036313 |    |
| 1135 | GSQTSSRPS      | vimentin                                              | 0,880621036 | 0,21547318  |    |
| 1136 | AVMVSHYIH      | Prolactin                                             | 1,394770847 | 0,356622424 |    |
| 1137 | DPPGTESFV      | Beta-2 adrenergic receptor                            | 1,66487479  | 0,127060288 | On |
| 1138 | GFKRSYEEH      | Insulin Receptor (IR)                                 | 0,994218998 | 0,230864219 |    |
| 1139 | GSRRRRRRY      | protamine                                             | 2,497547447 | 1,186364186 |    |
| 1140 | EFPLSPPKK      | stathmin                                              | 0,991343981 | 0,246555844 |    |
| 1141 | ESEKTKTKE      | myosin II heavy chain                                 | 0,719299072 | 0,099658432 |    |
| 1142 | RSSMSGLHL      | acetyl-CoA carboxylase                                | 1,073977993 | 0,285275113 |    |
| 1143 | SLVNSRAQE      | Cystatin S                                            | 0,771210045 | 0,249965156 |    |
| 1144 | RRATVA         | pyruvate kinase                                       | 1,461207145 | 0,17629759  | On |
| 1145 | ADSFSLHDA      | galectin-3                                            | 1,192309631 | 0,091602786 |    |
| 1146 | ATRRSYVSS      | glial fibrillary acidic protein                       | 1,978286181 | 0,372559617 | On |
| 1147 | DNIDSQGRN      | Beta-2 adrenergic receptor                            | 0,731255826 | 0,076638344 |    |
| 1148 | GDSSEGEIE      | Serum response factor                                 | 1,29775725  | 0,353676049 |    |
| 1149 | RKRKSSQAL      | Thyroid hormone receptor alpha                        | 1,438755356 | 0,441971409 |    |
| 1150 | AKRSRKE        | Histone H2B                                           | 1,05746788  | 0,424172133 |    |
| 1151 | LRRATLG        | pyruvate kinase                                       | 1,708822035 | 0,110933655 | On |
| 1152 | RRSSSVGYI      | Acetylcholine receptor protein delta                  | 1,77386161  | 0,063100287 | On |
| 1153 | SKVTSKAGS      |                                                       | 1,135355295 | 0,074109157 |    |
| 1154 | RGYSLG         | Lysozyme C                                            | 1,29481805  | 0,079757751 | On |
| 1155 | AARTPGGRR      | Myelin basic protein                                  | 1,943980154 | 0,389203154 | On |
| 1156 | TEPQYQPGE      | Proto-oncogene tyrosine-protein kinase Fyn            | 0,950121433 | 0,28623889  |    |
| 1157 | TTRRSASKT      | Fibrinogen alpha                                      | 1,695318013 | 0,309003031 |    |
| 1158 | WLTKTPEGN      | Actin and myosin binding protein                      | 0,840300018 | 0,100132199 |    |
| 1159 | RGRSSVYSA      | myosin heavy chain                                    | 2,228466354 | 1,739048933 |    |
| 1160 | RKRTLRRRL      | EGF Receptor                                          | 2,0123091   | 0,273665508 | On |
| 1161 | LRHASLG        | pyruvate kinase                                       | 0,984161446 | 0,066839849 |    |
| 1162 | YNGYSSNS       | Beta-2 adrenergic receptor                            | 1,023126225 | 0,051675446 |    |
| 1163 | SRTPSLPTP      | Microtubule-associated protein tau                    | 0,711409094 | 0,175349818 |    |
| 1164 | PKKGSKKAV      | Histone H2B                                           | 0,946515659 | 0,253386954 |    |
| 1165 | LELSDDDD       | Myosin heavy chain, nonmuscle type B                  | 1,202158505 | 0,217836321 |    |
| 1166 | TDDGYMPMS      | Insulin receptor substrate 10                         | 0,989573776 | 0,06062699  |    |
| 1167 | TRRLTGFLP      | Glycogen phosphorylase                                | 1,241064168 | 0,118919641 |    |
| 1168 | PPEKTEEEE      | somatostatin receptor type 5                          | 0,894098561 | 0,105484798 |    |
| 1169 | RTGRSGSV       | phosphorylase b kinase beta                           | 2,596180857 | 0,690762617 | On |
| 1170 | KQSPSSSPT      | phosphorylcholine transferase                         | 0,9753016   | 0,035083935 |    |
| 1171 | LLRPSRRVR      | somatostatin receptor type 6                          | 2,657042666 | 1,225698085 |    |
| 1172 | QMALTPVVV      | cell division protein kinase 4                        | 0,958187145 | 0,156422786 |    |
| 1173 | SRSRSPGRP      | Lamin B receptor                                      | 2,815830143 | 0,603802666 | On |
| 1174 | KRKRSRKES      | Histone H2B                                           | 2,708688443 | 0,874707084 |    |
| 1175 | LQAISPKQS      | phosphorylcholine transferase                         | 0,876956667 | 0,165852593 |    |

|      |           |                                            |             |             |  |
|------|-----------|--------------------------------------------|-------------|-------------|--|
| 1176 | QRRRSLEPP | Proto-oncogene tyrosine-protein kinase Src | 0,889379845 | 0,178050177 |  |
|------|-----------|--------------------------------------------|-------------|-------------|--|

**Suppl. Table 6. Average densitometry values for all substrates on the arrays for T cells and their Markov test of significance.**



| Peptide # | Sequence       | Source protein                                          | $\sum(x_1, x_2, \dots, x_9)/n$ | $\sigma(x_1, x_2, \dots, x_9)$ | Markov state |
|-----------|----------------|---------------------------------------------------------|--------------------------------|--------------------------------|--------------|
| 1         | HEYIYDPM       | platelet-derived growth factor receptor                 | 0,5964                         | 0,064018799                    | On           |
| 2         | KRPSVRAKA      | Myelin basic protein                                    | 2,629466667                    | 0,844519201                    |              |
| 3         | EDNEYTARQ      | Tyrosine-protein kinase transforming protein SRC        | 0,67045                        | 0,104864325                    |              |
| 4         | ENKLYGMSD      | Probable receptor with tyrosine-protein kinase activity | 0,5461                         | 0,046943743                    |              |
| 5         | HRLLTLDPV      | Interleukin-1 receptor                                  | 0,5604                         | 0,055165524                    |              |
| 6         | LEKKYVRRD      | macrophage colony stimulating factor 1 receptor         | 0,614883333                    | 0,103933194                    |              |
| 7         | PYKFPSSPLRIPGZ |                                                         | 0,583366667                    | 0,046292374                    |              |
| 8         | GKRQTEREK      | Troponin T                                              | 0,574833333                    | 0,053097651                    |              |
| 9         | APATSPKAE      | neuromodulin (GAP43)                                    | 0,715833333                    | 0,0599187                      |              |
| 10        | DEESEQGA       | tubulin                                                 | 0,52405                        | 0,064384017                    |              |
| 11        | FFRRSKIIV      | glutamate receptor 2                                    | 0,6436                         | 0,058429031                    |              |
| 12        | GMTEYVATR      | Mitogen-activated protein kinase FUS3                   | 0,578583333                    | 0,052323518                    |              |
| 13        | EAALYKNLL      | Mast/stem cell growth factor receptor                   | 0,52565                        | 0,027641032                    |              |
| 14        | ELILSPRSK      | stathmin                                                | 0,573133333                    | 0,062070086                    |              |
| 15        | RRAVSEQDA      | Tyrosine 3-monooxygenase                                | 0,555466667                    | 0,066321192                    |              |
| 16        | SEDNSEDEI      | acetyl-CoA carboxylase                                  | 0,575983333                    | 0,012349516                    |              |
| 17        | PASLSRAKA      | phosphorylcholine transferase                           | 0,540566667                    | 0,009575083                    |              |
| 18        | RRASL          | pyruvate kinase                                         | 0,661066667                    | 0,109113781                    |              |
| 19        | AKKMSTYNV      | myosin heavy chain                                      | 0,874233333                    | 0,081081619                    | On           |
| 20        | DDINSYEAW      | Coagulation factor IX                                   | 0,598166667                    | 0,046450858                    |              |
| 21        | ETRFTDTRK      | elongation factor 2                                     | 0,592466667                    | 0,051903345                    |              |
| 22        | QLSTSEENS      | Alpha-S2 casein                                         | 0,557666667                    | 0,048753365                    |              |
| 23        | SPRKSPKKS      | Histone H1                                              | 1,478266667                    | 0,376556825                    | On           |
| 24        | RRKASGP        | Histone H1.1                                            | 0,57515                        | 0,064853386                    |              |
| 25        | RQLRSPRRT      | ras-related protein Rab-4A                              | 0,569066667                    | 0,03757216                     |              |
| 26        | SAVASNMRD      | muscarinic acetylcholine receptor M2                    | 0,543583333                    | 0,016142972                    |              |
| 27        | RTPPPSG        | Myelin basic protein                                    | 0,59385                        | 0,100725725                    |              |
| 28        | LRRAS          | Red cell/liver pyruvate kinase                          | 0,67305                        | 0,180392355                    |              |
| 29        | SSTGSIDMV      | Microtubule-associated protein tau                      | 0,546533333                    | 0,048903073                    |              |
| 30        | TLASSFKRR      | glutamate (NMDA) receptor subunit zeta 1                | 0,542416667                    | 0,085386741                    |              |
| 31        | VGAFSTVKG      | rhodopsin kinase                                        | 0,552733333                    | 0,055347272                    |              |
| 32        | YSGHMSMDP      | pyruvate dehydrogenase E1                               | 0,560366667                    | 0,080475383                    |              |
| 33        | SPGEYVNI       | Insulin receptor substrate 1                            | 0,617233333                    | 0,048213317                    |              |
| 34        | RKRSAKE        | Histone H2B                                             | 0,858566667                    | 0,164130813                    |              |
| 35        | VINETSQHH      | vimentin                                                | 0,658133333                    | 0,072160265                    |              |
| 36        | SPVVSQDTS      | Microtubule-associated protein tau                      | 0,570033333                    | 0,038398792                    |              |
| 37        | LRRFSLATM      | Cytochrome P450 2B1                                     | 0,620983333                    | 0,048654314                    |              |
| 38        | PRPASVPPS      | Glycogen [starch] synthase                              | 0,668016667                    | 0,05237589                     |              |
| 39        | SSRPSSNRS      | vimentin                                                | 0,60535                        | 0,071591142                    |              |
| 40        | TKFASDDEH      | Lupus La protein                                        | 0,597366667                    | 0,066176045                    |              |
| 41        | LSDDSFIED      | DNA topoisomerase II                                    | 0,7239                         | 0,082043901                    |              |
| 42        | PSPKTPPGS      | Microtubule-associated protein tau                      | 0,5911                         | 0,003933404                    |              |
| 43        | KDIGSESTE      | Alpha-S1 casein                                         | 0,58605                        | 0,051631692                    |              |
| 44        | KRRGSVPIL      | erythrocyte protein 4.2                                 | 0,69535                        | 0,120033002                    |              |
| 45        | KRAKAKAKKR     | Myosin regulatory light chain 2                         | 4,192416667                    | 0,741054642                    | On           |
| 46        | QSYSSQRV       | Desmin                                                  | 0,871083333                    | 0,166583839                    |              |
| 47        | KGTGYIKTE      | Signal Transducer and Activator of Transcription 1      | 0,600083333                    | 0,023262715                    |              |
| 48        | KRSLSEMEI      | Serum response factor                                   | 0,626983333                    | 0,014428463                    |              |
| 49        | KRKQGSVRGL     | Glycogen phosphorylase                                  | 0,9333                         | 0,172693751                    |              |
| 50        | HTRDSEAQR      | erythrocyte band 7                                      | 0,579433333                    | 0,038306251                    |              |
| 51        | MAEVSWKVL      | Phosphorylase b kinase beta                             | 0,59835                        | 0,067878801                    |              |
| 52        | EEGISQESS      | high mobility group protein                             | 0,609216667                    | 0,017676931                    |              |
| 53        | EQQQTEDEL      | Beta casein                                             | 0,598633333                    | 0,052912275                    |              |
| 54        | IGEGTYGVV      | Cell division protein kinase 2                          | 0,557216667                    | 0,018401555                    |              |
| 55        | MMPYVVTR       | Stress-activated protein kinase JNK1                    | 0,618333333                    | 0,071842563                    |              |

|     |                |                                                         |             |             |    |
|-----|----------------|---------------------------------------------------------|-------------|-------------|----|
| 56  | PYKFPSSPLRIPGZ |                                                         | 0,614016667 | 0,045229606 |    |
| 57  | GQEVYVKKT      | PTK receptor for angiotensin 1 (TEK)                    | 0,57565     | 0,073106532 |    |
| 58  | AQETSGEEI      | insulin-like growth factor binding protein 1            | 0,56295     | 0,056208362 |    |
| 59  | DKAKSRPSL      | fructose-1,6-bisphosphatase                             | 0,672316667 | 0,034238437 |    |
| 60  | FPVSYSSSG      | Probable receptor with tyrosine-protein kinase activity | 0,553433333 | 0,065556367 |    |
| 61  | GRLSSMAMI      | myosin light chain kinase                               | 0,58895     | 0,056701896 |    |
| 62  | EEDLSDENI      | transcription factor BAF1                               | 0,584066667 | 0,053924273 |    |
| 63  | EPGPYAQPS      | Proto-oncogene C-crk                                    | 0,548166667 | 0,043607059 |    |
| 64  | RRRASQLKV      | Gamma-aminobutyric-acid receptor beta                   | 0,6223      | 0,066741329 |    |
| 65  | SGADYPDEL      | Trypsin I                                               | 0,611183333 | 0,048431813 |    |
| 66  | KQISVR         | Glycogen phosphorylase                                  | 2,005883333 | 0,456817236 | On |
| 67  | SLKDH          | L-lactate dehydrogenase M                               | 0,635616667 | 0,023324891 |    |
| 68  | APRTAGGRR      | Myelin basic protein                                    | 0,594066667 | 0,029669185 |    |
| 69  | DGHEYIYVD      | platelet-derived growth factor receptor                 | 0,6375      | 0,055625669 |    |
| 70  | FKRSYEEHI      | Insulin Receptor (IR)                                   | 0,63325     | 0,052752267 |    |
| 71  | REARSRAST      | cAMP-dependent protein kinase II (PKA)                  | 0,564966667 | 0,05704433  |    |
| 72  | DRVYVHPF       | Angiotensinogen                                         | 0,6025      | 0,082761384 |    |
| 73  | VRRSDAA        | Troponin I                                              | 0,62995     | 0,052756485 |    |
| 74  | RRKMSRGLP      | Volt.-dep. L-type calcium channel alpha-1S              | 0,53395     | 0,025130194 |    |
| 75  | SEVPYREVQ      | Tyrosine-protein kinase Src64B (hom MAP3K10)            | 0,622266667 | 0,034735772 |    |
| 76  | PRRASATSS      | Glycogen [starch] synthase                              | 0,62915     | 0,059031785 |    |
| 77  | RRLSI          | phosphorylase b kinase alpha                            | 0,940466667 | 0,030591947 | On |
| 78  | STLSLSPFYL     | Alpha crystallin B                                      | 0,657866667 | 0,025528067 |    |
| 79  | TRDIYETDY      | Insulin Receptor (IR)                                   | 0,617133333 | 0,088897791 |    |
| 80  | VPTLSTFRT      | Desmin                                                  | 0,594633333 | 0,068092466 |    |
| 81  | RASTSKSES      | 40S ribosomal protein S6                                | 0,62475     | 0,050064508 |    |
| 82  | SPSSSPTHE      | phosphorylcholine transferase                           | 0,61635     | 0,055539731 |    |
| 83  | STNDSLL        | Beta-2 adrenergic receptor                              | 0,722166667 | 0,049663825 |    |
| 84  | VRTFTHEVV      | Cell division protein kinase 2                          | 0,6848      | 0,091616565 |    |
| 85  | SRKMSVQEY      | phosducin                                               | 0,624883333 | 0,05875153  |    |
| 86  | LSGLSFKRN      | MARCKS-related protein                                  | 0,5842      | 0,015461619 |    |
| 87  | PTGTTQQRK      | Kinesin-related motor protein Eg5                       | 0,563666667 | 0,042030333 |    |
| 88  | STLASSFKR      | glutamate (NMDA) receptor subunit zeta 2                | 0,8282      | 0,144898591 |    |
| 89  | TPPKSPSSA      | Microtubule-associated protein tau                      | 0,623116667 | 0,055697013 |    |
| 90  | PAAVSEHGD      | Na+/K+ ATPase 1                                         | 0,637983333 | 0,05042576  |    |
| 91  | PVSPSLVQG      | muscarinic acetylcholine receptor M2                    | 0,687983333 | 0,051660887 |    |
| 92  | KKDASDDLD      | eukaryotic translation initiation factor 2 beta         | 0,544266667 | 0,008350782 |    |
| 93  | KSRPSLPLP      | fructose-1,6-bisphosphatase                             | 0,586583333 | 0,063765486 |    |
| 94  | LSVSSLPGL      | Glycogen [starch] synthase                              | 0,708416667 | 0,012279138 | On |
| 95  | SRHSSPHQS      | Glycogen [starch] synthase                              | 0,59445     | 0,068272286 |    |
| 96  | KKPPTPPPE      | Large T antigen                                         | 0,597983333 | 0,049894227 |    |
| 97  | KVPQTPLHT      | MAP kinase-activated protein kinase 2                   | 0,673683333 | 0,113419798 |    |
| 98  | PRRSSIRNA      | Neutrophil cytosol factor 1, p47-PHOX                   | 0,728716667 | 0,071343726 |    |
| 99  | ILDTTGQEE      | K-Ras                                                   | 0,613416667 | 0,043539529 |    |
| 100 | NDSNYIVKG      | Macrophage colony stimulating factor I receptor         | 0,687233333 | 0,054413009 |    |
| 101 | EFLRTSAGS      | 5'-AMP-activated protein kinase                         | 0,625633333 | 0,027485097 |    |
| 102 | ERTNSLPPV      | Volt.-dep. L-type calcium channel alpha-1S              | 0,643766667 | 0,070852856 |    |
| 103 | IRRASTIEM      | Cardiac phospholamban                                   | 0,6981      | 0,094056641 |    |
| 104 | NFDDYMKSL      | Fatty acid-binding protein                              | 0,6243      | 0,099588662 |    |
| 105 | PYKFPSSPLRIPGZ |                                                         | 0,6214      | 0,042472893 |    |
| 106 | GRTGRRNSI      |                                                         | 1,098733333 | 0,076036727 | On |
| 107 | ATPIYLDIL      | TrkC tyrosine kinase                                    | 0,713166667 | 0,039420391 |    |
| 108 | DMRQTVAVG      | elongation factor 1-alpha 1                             | 0,705433333 | 0,054046929 |    |
| 109 | GDRFTDEEV      | Myosin regulatory light chain 2                         | 0,7664      | 0,184915418 |    |
| 110 | GSGSSVTSR      | Desmin                                                  | 0,592383333 | 0,10569636  |    |
| 111 | EEPQYEEIP      | Middle T antigen                                        | 0,683966667 | 0,123648833 |    |

|     |                |                                                         |             |             |    |
|-----|----------------|---------------------------------------------------------|-------------|-------------|----|
| 112 | ERRLSLVPD      | cystic fibrosis transmembrane conductance regulator     | 0,748383333 | 0,09497614  |    |
| 113 | RRSSSRPIR      | Protamine YI                                            | 0,721666667 | 0,015035089 | On |
| 114 | SKIGSTENL      | Microtubule-associated protein tau                      | 0,6701      | 0,095060937 |    |
| 115 | NDMTSL         | Tropomyosin 1 alpha                                     | 0,68785     | 0,093323979 |    |
| 116 | AARLSLTDP      | platelet glycoprotein IB                                | 0,6422      | 0,102425493 |    |
| 117 | ARRSTTDAG      | Choriogonadotropin beta                                 | 0,625383333 | 0,028456526 |    |
| 118 | DLKDTKYKL      | myosin II heavy chain                                   | 0,65905     | 0,111687533 |    |
| 119 | GAFSTVKGV      | rhodopsin kinase                                        | 0,677983333 | 0,179040784 |    |
| 120 | RGRASSHSS      | Lamin A/C                                               | 0,7317      | 0,082120836 |    |
| 121 | RKRSRAEF       | Histone H2B                                             | 0,665916667 | 0,068222117 |    |
| 122 | LRAASLG        | Red cell/liver pyruvate kinase                          | 0,656883333 | 0,06145408  |    |
| 123 | RRRQSVLNL      | cystic fibrosis transmembrane conductance regulator     | 0,75965     | 0,163773965 |    |
| 124 | SIDEYFSEQ      | Interferon receptor                                     | 0,677783333 | 0,057967251 |    |
| 125 | EESESD         | synaptic vesicle amine transporter                      | 0,72595     | 0,065112556 |    |
| 126 | RRRS           | Troponin I                                              | 0,659683333 | 0,080392997 |    |
| 127 | TAYGTRRHL      | calponin alpha and beta                                 | 0,893666667 | 0,231121023 |    |
| 128 | TRRISQTSQ      | ryanodine receptor                                      | 0,680533333 | 0,065555909 |    |
| 129 | VTPRTPPPS      | Myelin basic protein                                    | 0,652       | 0,096432463 |    |
| 130 | REVSSLKSK      | myosin heavy chain                                      | 0,6826      | 0,109329753 |    |
| 131 | PEETQTQD       | HSP90-alpha                                             | 0,737533333 | 0,084344594 |    |
| 132 | KKQISVR        | Glycogen phosphorylase                                  | 2,819266667 | 0,525896747 | On |
| 133 | WLTKSPDGN      | caldesmon                                               | 0,696183333 | 0,116873267 |    |
| 134 | SRRSSLGSL      | Volt.-dep. L-type calcium channel alpha-1S              | 1,06085     | 0,133578367 | On |
| 135 | PETVYEVAG      | Cortactin                                               | 0,741666667 | 0,093754221 |    |
| 136 | QEPGSGPPE      | somatostatin receptor type 3                            | 0,62775     | 0,022318303 |    |
| 137 | SVSSSPIKE      | transcriptional factor SWI5                             | 0,6988      | 0,1255116   |    |
| 138 | TRLHSLRER      | Sucrose synthase 1                                      | 0,644616667 | 0,047710522 |    |
| 139 | PKEVYDVML      | TrkC tyrosine kinase                                    | 0,773933333 | 0,072497751 |    |
| 140 | PRTPGGRR       | Myelin basic protein                                    | 0,65005     | 0,055589522 |    |
| 141 | KLSPSPSSR      | Lamin B1                                                | 0,742833333 | 0,072756722 |    |
| 142 | LEKKYVRRD      | macrophage colony stimulating factor 1 receptor         | 0,929483333 | 0,070853903 | On |
| 143 | QASSTPLSP      | Lamin A/C                                               | 0,79215     | 0,086048504 |    |
| 144 | SRRDSLFP       | Sodium channel protein type II alpha                    | 0,80455     | 0,163378461 |    |
| 145 | KQPIYVME       | Tyrosine-protein kinase transforming protein Fps        | 0,745216667 | 0,142347488 |    |
| 146 | LLQDSVDFS      | vimentin                                                | 0,912466667 | 0,251968895 |    |
| 147 | QLSTSEENS      | Alpha-S2 casein                                         | 0,677083333 | 0,084920711 |    |
| 148 | KIQASFRGH      | neurogranin                                             | 1,8299      | 0,317118939 | On |
| 149 | NKGASQAGM      | calponin alpha and beta                                 | 0,691783333 | 0,107110491 |    |
| 150 | EIVESLSSS      | Beta casein                                             | 0,63815     | 0,052661292 |    |
| 151 | ESSNYMAPY      | platelet-derived growth factor receptor                 | 0,6075      | 0,073216335 |    |
| 152 | KRPSKRAKA      | Myelin basic protein                                    | 0,754366667 | 0,141052687 |    |
| 153 | NRAITARRQ      | Troponin I                                              | 0,653666667 | 0,07055301  |    |
| 154 | PYKFPSSPLRIPGZ |                                                         | 0,625466667 | 0,10425605  |    |
| 155 | GSRPSESNG      | Lens fiber major intrinsic protein                      | 0,834933333 | 0,296985876 |    |
| 156 | DAHKSKRQH      | transcription factor BAF1                               | 0,653083333 | 0,042961035 |    |
| 157 | DSLIYDDGL      | Probable receptor with tyrosine-protein kinase activity | 0,707016667 | 0,02526781  | On |
| 158 | GGRDSRSGS      | Myelin basic protein                                    | 0,617183333 | 0,074688066 |    |
| 159 | GVERSVRPT      | phosphorylase b kinase alpha                            | 0,616316667 | 0,054134236 |    |
| 160 | EGVKSDQAE      | neurofilament triplet M                                 | 0,70145     | 0,011810447 | On |
| 161 | ESLSSSEES      | Beta casein                                             | 0,6313      | 0,079440586 |    |
| 162 | RVRMSADAM      | Troponin I                                              | 0,639183333 | 0,032813674 |    |
| 163 | SNPTYSVMR      | Middle T antigen                                        | 0,612883333 | 0,009402511 |    |
| 164 | SSKRAK         | Myosin regulatory light chain 2                         | 0,697666667 | 0,010020507 | On |
| 165 | AGDGSDEEV      | myosin heavy chain                                      | 0,616566667 | 0,062525106 |    |
| 166 | AVDRYIAIT      | Beta-2 adrenergic receptor                              | 0,684266667 | 0,014602873 | On |
| 167 | DPLLTFRFP      | Lamin A/C                                               | 0,6458      | 0,051762937 |    |

|     |               |                                                  |             |             |    |
|-----|---------------|--------------------------------------------------|-------------|-------------|----|
| 168 | GENIYIRHS     | erythrocyte protein 4.1                          | 0,819833333 | 0,130759399 |    |
| 169 | RLSPSPTSQ     | Lamin C                                          | 0,65045     | 0,070867705 |    |
| 170 | RKESYSV       | Histone H2B                                      | 0,664566667 | 0,072571945 |    |
| 171 | PLSRTL        | Glycogen [starch] synthase                       | 0,646066667 | 0,096132767 |    |
| 172 | RSRASTPPA     | cAMP-dependent protein kinase II (PKA)           | 0,660333333 | 0,062535648 |    |
| 173 | SLSSSEESI     | Beta casein                                      | 0,6626      | 0,075987905 |    |
| 174 | LRRASLAG      | Red cell/liver pyruvate kinase                   | 0,89455     | 0,227756562 |    |
| 175 | ADSESEDEE     | cAMP-dependent protein kinase II (PKA)           | 0,685766667 | 0,094376289 |    |
| 176 | THERSPSPS     | phosphorylcholine transferase                    | 0,615683333 | 0,083467452 |    |
| 177 | TVTRSYSRV     | Lamin A/C                                        | 0,633266667 | 0,07151569  |    |
| 178 | YETDYRKG      | Insulin Receptor (IR)                            | 0,802266667 | 0,066324359 | On |
| 179 | RKQISVRGL     | Glycogen phosphorylase                           | 0,758333333 | 0,039087004 | On |
| 180 | AGTTYAL       | myosin heavy chain IA (fragment)                 | 0,64415     | 0,080026964 |    |
| 181 | LRRASVA       | pyruvate kinase                                  | 0,782733333 | 0,163188911 |    |
| 182 | YRGYSLGNW     | Lysozyme C                                       | 0,7006      | 0,088007699 |    |
| 183 | SSLKSRKRA     | spermatid nuclear transition protein 1           | 1,225116667 | 0,276513171 | On |
| 184 | PMRRSVSEA     | hormone sensitive lipase                         | 0,693683333 | 0,057909992 |    |
| 185 | RSKRSGSV      | phosphorylase b kinase beta                      | 0,777966667 | 0,094876519 |    |
| 186 | TEGQYQQQP     | Proto-oncogene tyrosine-protein kinase Lck       | 0,684533333 | 0,044483936 |    |
| 187 | TTPLSPTRL     | Lamin B2                                         | 0,706133333 | 0,005596775 | On |
| 188 | PQPEYVNQP     | Receptor tyrosine-protein kinase erbB-2          | 0,648133333 | 0,117804869 |    |
| 189 | VKRGISGL      | Histone H4                                       | 0,83215     | 0,198204595 |    |
| 190 | KRKQISVRG     | Glycogen phosphorylase                           | 1,5249      | 0,19094772  | On |
| 191 | LPVPSTHIG     | cGMP-dependent protein kinase (PKG)              | 0,738716667 | 0,13645086  |    |
| 192 | QRRHSLEPP     | Tyrosine-protein kinase transforming protein SRC | 0,68845     | 0,093531064 |    |
| 193 | SRTLSVSSL     | Glycogen [starch] synthase                       | 0,703083333 | 0,021562558 | On |
| 194 | KRPSEAKA      | Myelin basic protein                             | 0,9312      | 0,024480911 | On |
| 195 | LRGRSFMNN     | 6-phosphofruktokinase                            | 0,628833333 | 0,083642138 |    |
| 196 | QRVSSYRRT     | Desmin                                           | 0,733816667 | 0,124679418 |    |
| 197 | HDLSEMFN      | Prolactin                                        | 0,697083333 | 0,06296923  |    |
| 198 | KRPSRAKA      | Myelin basic protein                             | 2,102333333 | 0,652569328 | On |
| 199 | EDNEYTARP     | Proto-oncogene tyrosine-protein kinase Src       | 0,656133333 | 0,14531165  |    |
| 200 | ENAPSSTSS     | DNA topoisomerase II                             | 0,608266667 | 0,025485464 |    |
| 201 | HMRSSMSGL     | acetyl-CoA carboxylase                           | 0,589716667 | 0,075016913 |    |
| 202 | LDRSSHAQR     | Insulin Receptor (IR)                            | 0,621183333 | 0,04152528  |    |
| 203 | PYKFPSSPLIPGZ |                                                  | 0,600183333 | 0,035866891 |    |
| 204 | GKEIYNTIR     | Ras p21 activator protein                        | 0,6097      | 0,055634582 |    |
| 205 | APATPGGRR     | Myelin basic protein                             | 0,64665     | 0,0741969   |    |
| 206 | DEEESSEAK     | elongation factor 1-beta                         | 0,61365     | 0,036929008 |    |
| 207 | FFKKSIST      | glutamate receptor 6                             | 0,9997      | 0,085918983 | On |
| 208 | GMGTSVERA     | pyruvate dehydrogenase E1                        | 0,54875     | 0,086440162 |    |
| 209 | DYDSSDIED     | cactus                                           | 0,6444      | 0,058194774 |    |
| 210 | EKRASQAF      | stathmin                                         | 0,554       | 0,054076659 |    |
| 211 | RRAVSELDA     | tyrosine 3-monooxygenase                         | 0,55535     | 0,061458007 |    |
| 212 | SDGGYMDMS     | platelet-derived growth factor receptor          | 0,604216667 | 0,034122362 |    |
| 213 | NWHMTPPRK     | serine/threonine protein phosphatase PP1         | 0,610833333 | 0,052784567 |    |
| 214 | RRASI         | pyruvate kinase                                  | 0,726216667 | 0,20748323  |    |
| 215 | AKKGSEQES     | cAMP-dependent protein kinase (PKA)              | 0,548066667 | 0,055027574 |    |
| 216 | DDEMTGYVA     | Mitogen-activated protein kinase p38             | 0,55595     | 0,091521509 |    |
| 217 | ETDYRKG       | Insulin Receptor (IR)                            | 0,564483333 | 0,025095628 |    |
| 218 | YVTTSTRTY     | vimentin                                         | 0,581833333 | 0,075532513 |    |
| 219 | SPQPSRRGS     | protein phosphatase 1                            | 0,603716667 | 0,104620667 |    |
| 220 | RRAASVA       | pyruvate kinase                                  | 0,578733333 | 0,048784088 |    |
| 221 | RPSENGQP      | Lens fiber major intrinsic protein               | 0,587       | 0,02484673  |    |
| 222 | SASTTPVKK     | Histone H1                                       | 0,585366667 | 0,030877968 |    |
| 223 | NSYGSRG       | iron-responsive element binding protein          | 0,561066667 | 0,058300619 |    |

|     |                |                                                         |             |             |    |
|-----|----------------|---------------------------------------------------------|-------------|-------------|----|
| 224 | LRRASL         | pyruvate kinase                                         | 0,704316667 | 0,046067963 |    |
| 225 | SSTDSADSG      | Early E1A                                               | 0,586816667 | 0,027763655 |    |
| 226 | TKSGSTTKN      | eukaryotic translation initiation factor 4E             | 0,585383333 | 0,052098566 |    |
| 227 | VETTYADFI      | cAMP-dependent protein kinase inhibitor alpha           | 0,609333333 | 0,103296389 |    |
| 228 | YSFTTTAER      | Actin                                                   | 0,571216667 | 0,030038013 |    |
| 229 | SPFKYQSLL      | Beta-2 adrenergic receptor                              | 0,5651      | 0,046077778 |    |
| 230 | RKRSAAE        | Histone H2B                                             | 0,66165     | 0,040936679 |    |
| 231 | VIKRSPRKR      | transcriptional factor SWI6                             | 1,31165     | 0,255218126 | On |
| 232 | SPVKSPEAK      | neurofilament triplet M                                 | 0,646683333 | 0,130987737 |    |
| 233 | LRRASVAQL      | pyruvate kinase                                         | 0,622883333 | 0,05405248  |    |
| 234 | PRMPSLSVP      | Sodium channel protein                                  | 0,58475     | 0,022085327 |    |
| 235 | SSPVYQDAV      | Cortactin                                               | 0,642983333 | 0,023300298 |    |
| 236 | TKDTYDALH      | T-cell surface glycoprotein CD3 zeta                    | 0,616366667 | 0,118560859 |    |
| 237 | LRSPSWEPF      | Heat Shock Protein 26                                   | 0,61705     | 0,071428857 |    |
| 238 | PSLPTPPTR      | Microtubule-associated protein tau                      | 0,60985     | 0,066866484 |    |
| 239 | KASASPRRK      | Histone H3                                              | 2,613366667 | 0,358010112 | On |
| 240 | KRRDYDLDA      | Probable receptor with tyrosine-protein kinase activity | 0,574433333 | 0,057730355 |    |
| 241 | PAPAVRASDRA    | Troponin I                                              | 0,559866667 | 0,066567814 |    |
| 242 | QSRASDKQT      | T-cell surface glycoprotein CD3 gamma                   | 0,601283333 | 0,078100686 |    |
| 243 | KGQESFKKQ      | Nucleophosmin                                           | 0,707066667 | 0,059511852 |    |
| 244 | KRSGSVYEP      | phosphorylase b kinase beta                             | 0,616233333 | 0,066315023 |    |
| 245 | KRAQISVRGL     | Glycogen phosphorylase                                  | 0,9786      | 0,152084138 | On |
| 246 | HSSQSQGGG      | Lamin C                                                 | 0,52495     | 0,061864543 |    |
| 247 | MAEAYSEIG      | T-cell surface glycoprotein CD3 zeta                    | 0,564866667 | 0,057226281 |    |
| 248 | EEESSYSYE      | RNA polymerase alpha                                    | 0,618783333 | 0,067807194 |    |
| 249 | EQPGSDEED      | Ornithine decarboxylase                                 | 0,620366667 | 0,064423861 |    |
| 250 | IEQFSTVKG      | G protein-coupled receptor kinase 5                     | 0,618883333 | 0,071394985 |    |
| 251 | MLDHSESTK      | myelin                                                  | 0,6707      | 0,108490007 |    |
| 252 | PYKFPSSPLRIPGZ |                                                         | 0,667433333 | 0,07816258  |    |
| 253 | GPRTTAQQ       | cGMP-dependent protein kinase (PKG)                     | 0,552366667 | 0,020613359 |    |
| 254 | AQDTYLVLD      | Erythropoietin Receptor                                 | 0,596716667 | 0,020150531 |    |
| 255 | DIPESQMEE      | Band 3 anion transport protein                          | 0,613233333 | 0,049740331 |    |
| 256 | FPRASFGSR      | Desmin                                                  | 0,63125     | 0,035803235 |    |
| 257 | GRKASGSSP      | myosin light chain kinase                               | 0,624       | 0,051915364 |    |
| 258 | EDVGSDEEE      | HSP90-alpha                                             | 0,710616667 | 0,066827344 |    |
| 259 | EPAVSPLLP      | Tyrosine-protein kinase Dash/Abl                        | 0,64965     | 0,111230219 |    |
| 260 | RRRASQLKI      | Gamma-aminobutyric-acid receptor beta-2                 | 0,634633333 | 0,056262855 |    |
| 261 | SFTTTAERE      | Actin                                                   | 0,572783333 | 0,050256829 |    |
| 262 | PLSRTL         | glycogen synthase                                       | 0,592216667 | 0,074960882 |    |
| 263 | SGRGK          | Histone H4                                              | 0,6021      | 0,065973492 |    |
| 264 | APRSPGGRR      | Myelin basic protein                                    | 0,636716667 | 0,066078165 |    |
| 265 | DGERYDEDE      | Glycogen [starch] synthase                              | 0,699266667 | 0,104991725 |    |
| 266 | FKRPTLRRV      | troponin I                                              | 0,88245     | 0,074565955 | On |
| 267 | REAEYEPET      | Cortactin                                               | 0,606816667 | 0,042037926 |    |
| 268 | DRVYIHPF       | Angiotensinogen                                         | 0,601783333 | 0,045444294 |    |
| 269 | VRRISGL        | Histone H4                                              | 0,557283333 | 0,05134865  |    |
| 270 | RRKGTDVNV      | Annexin I                                               | 0,560216667 | 0,034914045 |    |
| 271 | SETKTEEEE      | DNA topoisomerase II                                    | 0,650283333 | 0,053442201 |    |
| 272 | PQRATSNVF      | Myosin regulatory light chain 2                         | 0,66035     | 0,07547504  |    |
| 273 | RRGSV          | pyruvate kinase or palladin                             | 1,1303      | 0,300482165 |    |
| 274 | STSKSESSQ      | 40S ribosomal protein S6                                | 0,577916667 | 0,039916837 |    |
| 275 | TRAPSRTAS      | ATP-citrate (pro-S-) lyase                              | 0,563316667 | 0,081069531 |    |
| 276 | VPRTPGGRR      | Myelin basic protein                                    | 0,54385     | 0,050349495 |    |
| 277 | RASSRSVR       | Lamin B0                                                | 0,590266667 | 0,029251363 |    |
| 278 | SPSSPASL       | phosphorylcholine transferase                           | 0,660383333 | 0,040447854 |    |
| 279 | RVYVHPF        |                                                         | 0,784233333 | 0,141698473 |    |



|     |                |                                                     |             |             |    |
|-----|----------------|-----------------------------------------------------|-------------|-------------|----|
| 280 | VRRVSDDDR      | Tyrosine 3-monooxygenase                            | 0,675       | 0,116662933 |    |
| 281 | SRKMSIQEY      | phosducin                                           | 0,635283333 | 0,074773172 |    |
| 282 | LSGFDFKKS      | myristolated alanine-rich C-kinase substrate        | 1,424333333 | 0,058977288 | On |
| 283 | PSSTSSSSI      | DNA topoisomerase II                                | 0,6066      | 0,062160451 |    |
| 284 | STGIYEALE      | Alpha enolase                                       | 0,769383333 | 0,05085801  | On |
| 285 | TPPKSPSAS      | Microtubule-associated protein tau                  | 0,716166667 | 0,054123583 |    |
| 286 | LYSSSPGGA      | vimentin                                            | 0,884533333 | 0,141659553 |    |
| 287 | PVPKSPVEE      | neurofilament triplet M                             | 0,731566667 | 0,100066789 |    |
| 288 | KKASFKAKK      |                                                     | 2,107933333 | 0,223323601 | On |
| 289 | KSPAKTPVK      | Actin and myosin binding protein                    | 1,364483333 | 0,259633717 | On |
| 290 | PLSKTLSVSS     | Glycogen [starch] synthase                          | 0,668083333 | 0,100445685 |    |
| 291 | SRGKSSSYS      | Fibrinogen alpha                                    | 0,718383333 | 0,114922701 |    |
| 292 | KKLGSKKPQ      | Sodium channel protein type II alpha                | 2,4509      | 0,677597522 | On |
| 293 | KTASTRKV       | cystic fibrosis transmembrane conductance regulator | 4,0592      | 0,76311626  | On |
| 294 | PRRTRRAS       | Protamine YII                                       | 0,827283333 | 0,14250723  |    |
| 295 | IHQRSRRL       | Neutrophil cytosol factor 2                         | 0,676966667 | 0,052409833 |    |
| 296 | NDALSGSGN      | galectin-3                                          | 0,613433333 | 0,05810468  |    |
| 297 | EETQTQDQP      | HSP90-alpha                                         | 0,658083333 | 0,072558831 |    |
| 298 | ERSQSRKDS      | alpha-1B adrenergic receptor                        | 0,620866667 | 0,052008979 |    |
| 299 | IRQASQAGP      | synapsins                                           | 0,640333333 | 0,003164736 | On |
| 300 | NFDDYMKEV      | Fatty acid-binding protein                          | 0,658216667 | 0,04020266  |    |
| 301 | PYKFPSSPLRIPGZ |                                                     | 0,570433333 | 0,090606349 |    |
| 302 | GRRQSLIQD      | tyrosine 3-monooxygenase                            | 0,844066667 | 0,145795178 |    |
| 303 | ASFEYTILD      | Erythropoietin Receptor                             | 0,700516667 | 0,107557925 |    |
| 304 | DLSTYASIN      | Insulin receptor substrate 2                        | 0,6961      | 0,109903283 |    |
| 305 | GDNDYIPL       | platelet-derived growth factor receptor             | 0,65195     | 0,059018599 |    |
| 306 | GSESTEDQA      | Alpha-S1 casein                                     | 0,6518      | 0,068389485 |    |
| 307 | EENVSVDDT      | eukaryotic translation initiation factor 4E         | 0,64205     | 0,018435699 |    |
| 308 | ERRKSKSGA      | cAMP-regulated phosphoprotein 21                    | 0,6172      | 0,03033532  |    |
| 309 | RRRSRSRS       | Lamin B receptor                                    | 0,798783333 | 0,047214093 | On |
| 310 | SKIGSLDNI      | Microtubule-associated protein tau                  | 0,761816667 | 0,092168553 |    |
| 311 | NDITSL         | Tropomyosin beta                                    | 0,7172      | 0,083560347 |    |
| 312 | AARGSFIDAS     | rhodopsin kinase                                    | 0,64955     | 0,032957245 |    |
| 313 | ARNDSVTVA      | cAMP response element-binding protein CRE-BP1       | 0,6663      | 0,030254366 |    |
| 314 | DLFGSDEED      | elongation factor 1-beta                            | 0,698533333 | 0,056236766 |    |
| 315 | FSSRSYTSG      | Keratin 8                                           | 0,652783333 | 0,046977589 |    |
| 316 | RGKSSSYSK      | Fibrinogen alpha                                    | 2,216516667 | 1,111485643 |    |
| 317 | RKRSRAEA       | Histone H2B                                         | 0,740883333 | 0,102521269 |    |
| 318 | LKRASLG        | pyruvate kinase                                     | 0,681933333 | 0,040255959 |    |
| 319 | RRRPTPATL      | Protein phosphatase inhibitor 1                     | 0,666416667 | 0,091626582 |    |
| 320 | SIADTFVGT      | Serine/threonine-protein kinase STE7                | 0,729566667 | 0,054184935 |    |
| 321 | LRRNSI         | cystic fibrosis transmembrane conductance regulator | 0,83965     | 0,143009394 |    |
| 322 | RRRRASVA       | pyruvate kinase                                     | 0,74145     | 0,124926325 |    |
| 323 | TATDYHTTS      | Band 3 anion transport protein                      | 0,830333333 | 0,118965782 |    |
| 324 | TRRASRPVR      | Protamine YII                                       | 0,702316667 | 0,033719661 |    |
| 325 | VSSSYRRM       | vimentin                                            | 0,67215     | 0,089811478 |    |
| 326 | REVSSLKKNK     | myosin heavy chain                                  | 0,648416667 | 0,101239537 |    |
| 327 | LSYRRYSL       |                                                     | 0,980566667 | 0,237864437 |    |
| 328 | KKKASVA        | pyruvate kinase                                     | 1,327983333 | 0,216360357 | On |
| 329 | WKRTSMKLL      | dihydropyridine-sensitive calcium channel           | 1,313566667 | 0,207164799 | On |
| 330 | SRRQSVLVK      | glutamate receptor 6                                | 3,550816667 | 0,310947655 | On |
| 331 | PENDYEDVE      | Hematopoietic cell-specific LYN substrate           | 0,8155      | 0,117340168 |    |
| 332 | QEGLYNELQ      | T-cell surface glycoprotein CD3 zeta                | 0,698533333 | 0,176531774 |    |
| 333 | SVPPSPSLS      | Glycogen [starch] synthase                          | 0,785966667 | 0,133317824 |    |
| 334 | TRKVSLAPQ      | cystic fibrosis transmembrane conductance regulator | 0,713966667 | 0,084988453 |    |
| 335 | PKDPSQRRR      | Proto-oncogene tyrosine-protein kinase Src          | 0,645283333 | 0,067675972 |    |



|     |                |                                                           |             |             |    |
|-----|----------------|-----------------------------------------------------------|-------------|-------------|----|
| 336 | KRKQISVR       | Glycogen phosphorylase                                    | 1,867083333 | 0,179076177 | On |
| 337 | KLRRSSSVG      | Acetylcholine receptor protein delta                      | 0,964116667 | 0,103672251 | On |
| 338 | LDPLSEPED      | Thyroid hormone receptor alpha                            | 0,844066667 | 0,10523923  |    |
| 339 | QAGMTAPGT      | calponin alpha and beta                                   | 0,7031      | 0,088917977 |    |
| 340 | SRRASRPVR      | Protamine Z                                               | 0,694633333 | 0,096837229 |    |
| 341 | KPGFSPQPS      |                                                           | 0,676583333 | 0,087559288 |    |
| 342 | LLPMSPEEF      | Signal Transducer and Activator of Transcription 1        | 0,711683333 | 0,130488852 |    |
| 343 | QLNDSSEEE      | E7 protein                                                | 0,721083333 | 0,022722615 | On |
| 344 | KGGSYSQAA      | HLA class I histocompatibility antigen B7                 | 0,629266667 | 0,048513183 |    |
| 345 | NIYISPLKS      | Retinoblastoma-associated protein                         | 0,62835     | 0,143475021 |    |
| 346 | EIRVSINEK      | cGMP-dependent protein kinase (PKG)                       | 0,652083333 | 0,055045804 |    |
| 347 | ESRISLPLP      | vimentin                                                  | 0,695466667 | 0,050668882 |    |
| 348 | KRPSIRAKA      | Myelin basic protein                                      | 2,203033333 | 0,308724878 | On |
| 349 | NPGFYVEAN      | 1-phosphatidylinositol-4,5-bisphosphate phosphodiesterase | 0,694716667 | 0,072326739 |    |
| 350 | PYKFPSSPLRIPGZ |                                                           | 0,626816667 | 0,104842154 |    |
| 351 | GSRGSGSSV      | Desmin                                                    | 0,6825      | 0,032978351 |    |
| 352 | DAGASPVEK      | myristolated alanine-rich C-kinase substrate (MARCKS)     | 0,650783333 | 0,078582784 |    |
| 353 | DRRVVAAE       | cAMP-dependent protein kinase II (PKA)                    | 0,693933333 | 0,127379789 |    |
| 354 | GGRASDYKS      | Myelin basic protein                                      | 0,708233333 | 0,08332475  |    |
| 355 | GVDTYVEMR      | Macrophage colony stimulating factor I receptor           | 0,7147      | 0,074318537 |    |
| 356 | EGTHSTKRG      | Fibrinogen alpha                                          | 0,65725     | 0,082952667 |    |
| 357 | ESLESYEIN      | Matrix Gla-protein                                        | 0,63645     | 0,065101421 |    |
| 358 | RVRKTKGKY      | glutamate receptor 1                                      | 4,380766667 | 0,210929014 | On |
| 359 | SNPEYLSAS      | Insulin Receptor (IR)                                     | 0,770383333 | 0,071619322 |    |
| 360 | RRSTVA         | Protamines Z1 and Z2                                      | 0,585183333 | 0,080910262 |    |
| 361 | AEPGSPTAA      | myristolated alanine-rich C-kinase substrate (MARCKS)     | 0,616833333 | 0,08121712  |    |
| 362 | AVDGYVKPQ      | Signal Transducer and Activator of Transcription 5        | 0,608783333 | 0,094806437 |    |
| 363 | DPGVSYRTR      | pyruvate dehydrogenase E1                                 | 0,65445     | 0,109102024 |    |
| 364 | GEINTEDDD      | calsequestrin                                             | 0,640116667 | 0,094939914 |    |
| 365 | RLSISTESQ      | phosphorylase b kinase alpha                              | 0,91395     | 0,039474317 | On |
| 366 | RKEISVR        | Glycogen phosphorylase                                    | 1,474866667 | 0,161356011 | On |
| 367 | PGSPQKR        | Histone H2                                                | 0,6266      | 0,062652255 |    |
| 368 | RSGYSSPGS      | Microtubule-associated protein tau                        | 0,639116667 | 0,056893429 |    |
| 369 | SLRASTSKS      | 40S ribosomal protein S6                                  | 0,703733333 | 0,087807615 |    |
| 370 | VRKISGL        | Histone H4                                                | 0,68        | 0,091314594 |    |
| 371 | ADGVYAASG      | Tyrosine-protein kinase transforming protein Fes          | 0,74415     | 0,095753703 |    |
| 372 | TGFLTEYVA      | myelin                                                    | 0,6794      | 0,077823872 |    |
| 373 | TVSTSLGHS      | muscarinic acetylcholine receptor M2                      | 0,688283333 | 0,115101552 |    |
| 374 | YDKEYYSVH      | Receptor tyrosine kinase for hepatocyte growth factor     | 0,732583333 | 0,143570478 |    |
| 375 | RKLKSQGTR      | spermatid nuclear transition protein 2                    | 0,59565     | 0,063707234 |    |
| 376 | NRKPSKDKD      | Gamma-aminobutyric-acid receptor gamma                    | 0,618566667 | 0,063831449 |    |
| 377 | LRRASPG        | pyruvate kinase                                           | 0,650683333 | 0,085177162 |    |
| 378 | YMAPYDNYV      | platelet-derived growth factor receptor                   | 0,748466667 | 0,068267029 |    |
| 379 | SSKAYGNGY      | Beta-2 adrenergic receptor                                | 0,708916667 | 0,097601412 |    |
| 380 | PLTPSGEAP      | EGF Receptor                                              | 0,636233333 | 0,101373323 |    |
| 381 | RRRRPTPA       | pyruvate kinase                                           | 1,12535     | 0,44797438  |    |
| 382 | TEGQYQPQP      | Proto-oncogene tyrosine-protein kinase Lck                | 0,709583333 | 0,068815506 |    |
| 383 | TSSSIFDI       | DNA topoisomerase II                                      | 0,720216667 | 0,078733817 |    |
| 384 | PPSPSLSRH      | Glycogen [starch] synthase                                | 0,909883333 | 0,288378716 |    |
| 385 | SSKRAKAK       | Myosin regulatory light chain 2                           | 1,295416667 | 0,188135387 | On |
| 386 | KRKNSILNP      | cystic fibrosis transmembrane conductance regulator       | 0,709266667 | 0,109591699 |    |
| 387 | LNRMSFASN      | acetyl-CoA carboxylase                                    | 0,60995     | 0,100205597 |    |
| 388 | QRHGSKYLA      | Myelin basic protein                                      | 0,6235      | 0,071400082 |    |
| 389 | SRTASFSES      | ATP-citrate (pro-S-) lyase                                | 0,6406      | 0,08252543  |    |
| 390 | KRPSDRAKA      | Myelin basic protein                                      | 1,1958      | 0,088779512 | On |
| 391 | LRGPSWDPF      | Heat Shock Protein 27                                     | 0,747283333 | 0,039384691 | On |

|     |                |                                                           |             |             |    |
|-----|----------------|-----------------------------------------------------------|-------------|-------------|----|
| 392 | QRSTSTPNV      | RAF proto-oncogene ser/thr-protein kinase                 | 0,697866667 | 0,06618258  |    |
| 393 | HDALSGSGN      | galectin-3                                                | 0,641533333 | 0,055541221 |    |
| 394 | KRPSQRAKY      | Myelin basic protein                                      | 2,740266667 | 0,587325306 | On |
| 395 | EDNEYTARE      | Tyrosine-protein kinase Hck                               | 0,649483333 | 0,047554921 |    |
| 396 | ENAFSPSRS      | caldesmon                                                 | 0,579033333 | 0,037516582 |    |
| 397 | HKSGYLSSE      | Connection of cytoskeletal structure to plasma membrane   | 0,585283333 | 0,063270719 |    |
| 398 | LAYESHESM      | Matrix Gla-protein                                        | 0,601366667 | 0,049916369 |    |
| 399 | PYKFPSSPLRIPGZ |                                                           | 0,581416667 | 0,066948367 |    |
| 400 | GHQGTVPSPD     | Beta-2 adrenergic receptor                                | 0,5518      | 0,069111697 |    |
| 401 | ANDEYFIRK      | Acetylcholine receptor protein beta                       | 0,681433333 | 0,051471308 |    |
| 402 | DEASTTVSK      | Rhodopsin                                                 | 0,5472      | 0,012624843 |    |
| 403 | FEARYQQPF      | 1-phosphatidylinositol-4,5-bisphosphate phosphodiesterase | 0,55225     | 0,034789821 |    |
| 404 | GLLRSWNDP      | Prolactin                                                 | 0,574983333 | 0,07250713  |    |
| 405 | DTVTSPQRA      | Proto-oncogene tyrosine-protein kinase Src                | 0,6428      | 0,043450221 |    |
| 406 | EKHHSIDAQ      | Phosphoenolpyruvate carboxylase 1                         | 0,529966667 | 0,063876187 |    |
| 407 | RRASTIEMP      | Cardiac phospholamban                                     | 0,568516667 | 0,079144344 |    |
| 408 | SDEESNDDS      | calsequestrin                                             | 0,600133333 | 0,081796804 |    |
| 409 | NVFSSPGGT      | Actin and myosin binding protein                          | 0,583633333 | 0,024599334 |    |
| 410 | RRASF          | pyruvate kinase                                           | 0,746433333 | 0,200626395 |    |
| 411 | AKGGTVKAA      | annexin IV                                                | 0,723066667 | 0,083310787 |    |
| 412 | DDEITQDEN      | muscarinic acetylcholine receptor M2                      | 0,60205     | 0,057646957 |    |
| 413 | ETDDYAEII      | Focal adhesion kinase                                     | 0,597766667 | 0,055975744 |    |
| 414 | YTTNPSKI       | transcriptional factor SWI7                               | 0,578516667 | 0,012868912 |    |
| 415 | SPLKSPYKI      | Retinoblastoma-associated protein                         | 0,6901      | 0,086137139 |    |
| 416 | RKRTRKE        | Histone H2B                                               | 0,880866667 | 0,142472116 |    |
| 417 | RPPGFTPFR      |                                                           | 0,659366667 | 0,092934209 |    |
| 418 | SASGTPNKE      | caldesmon                                                 | 0,583266667 | 0,016577562 |    |
| 419 | NSVDTSSLS      | Glycogen [starch] synthase                                | 0,6423      | 0,115108999 |    |
| 420 | LRANSI         | cystic fibrosis transmembrane conductance regulator       | 0,698366667 | 0,20792793  |    |
| 421 | SSSSPSRR       | Lamin B receptor                                          | 0,569366667 | 0,036640059 |    |
| 422 | TKSASFLKG      | nodulin-26                                                | 0,76235     | 0,106579978 |    |
| 423 | VESLSSSEE      | Beta casein                                               | 0,6043      | 0,085404811 |    |
| 424 | YRRNSVRFL      | Neutrophil cytosol factor 3                               | 0,742383333 | 0,075122359 |    |
| 425 | SPALTGDEA      | Insulin receptor substrate 4                              | 0,619283333 | 0,053393076 |    |
| 426 | RKQITVR        | Glycogen phosphorylase                                    | 2,202766667 | 0,244878447 | On |
| 427 | VHNRSKINL      | HMG-CoA reductase                                         | 0,83245     | 0,057066058 | On |
| 428 | SPVHSIADE      | fructose-1,6-bisphosphatase                               | 0,578966667 | 0,06133072  |    |
| 429 | LRRASLGAF      | pyruvate kinase                                           | 0,570733333 | 0,07696244  |    |
| 430 | PRKGSPRKG      | Histone H2B.2                                             | 0,552866667 | 0,018321041 |    |
| 431 | SSPGSPGTP      | Microtubule-associated protein tau                        | 0,610883333 | 0,060400681 |    |
| 432 | TKAASEKKT      | myelin                                                    | 0,583066667 | 0,04806276  |    |
| 433 | LRRSSSVGY      | Acetylcholine receptor protein delta                      | 0,777716667 | 0,126348963 |    |
| 434 | PSEKSEEIT      | astrocytic phosphoprotein PEA-15                          | 0,585233333 | 0,061105433 |    |
| 435 | KAQEYFNIK      | Acetylcholine receptor protein delta                      | 0,598366667 | 0,049498894 |    |
| 436 | KRQSSTSNA      | phosphorylase b kinase beta                               | 0,538983333 | 0,046795554 |    |
| 437 | QKRPSQRSKYL    | Myelin basic protein                                      | 1,874866667 | 0,465828533 | On |
| 438 | QSPSSSPH       | phosphorylcholine transferase                             | 0,660833333 | 0,137203756 |    |
| 439 | KGHEYTNIK      | Protein-tyrosine phosphatase 2                            | 0,690733333 | 0,101458861 |    |
| 440 | KRRSSSYHV      | Sodium channel protein type II alpha                      | 0,71015     | 0,071707124 |    |
| 441 | KAKQISVRGL     | Glycogen phosphorylase                                    | 1,184316667 | 0,283499575 |    |
| 442 | HSIYSSDDD      | Myb proto-oncogene protein                                | 0,60245     | 0,024608637 |    |
| 443 | LVMQTAAGT      | myosin light chain kinase                                 | 0,547216667 | 0,076486429 |    |
| 444 | EEELYLEPL      | Tyrosine-protein kinase receptor                          | 0,57985     | 0,028397652 |    |
| 445 | EQLSTSEEN      | Alpha-S2 casein                                           | 0,567333333 | 0,076470717 |    |
| 446 | IDMESQERI      | Transcription factor AP-1                                 | 0,662283333 | 0,100674246 |    |
| 447 | MILLSELSR      | eukaryotic translation initiation factor 4F               | 0,6855      | 0,137229558 |    |

|     |                |                                                       |             |             |    |
|-----|----------------|-------------------------------------------------------|-------------|-------------|----|
| 448 | PYKFPSSPLRIPGZ |                                                       | 0,668533333 | 0,014959408 | On |
| 449 | GPAASAAA       | myristolated alanine-rich C-kinase substrate (MARCKS) | 0,607016667 | 0,013507056 |    |
| 450 | AQAASPAKG      | Protein tyrosine phosphatase 1B                       | 0,587416667 | 0,033507147 |    |
| 451 | DHSRSTKAA      | myelin                                                | 0,612033333 | 0,067681415 |    |
| 452 | FPFHSPSRL      | Alpha crystallin B                                    | 0,851216667 | 0,11496159  |    |
| 453 | GRILTLPRS      | Insulin Receptor (IR)                                 | 0,619183333 | 0,097258216 |    |
| 454 | EDVGSDEED      | Heat Shock Protein 90-beta                            | 0,6696      | 0,092221915 |    |
| 455 | ENTVSTSLG      | muscarinic acetylcholine receptor M2                  | 0,642816667 | 0,035805524 |    |
| 456 | RRQHSYDTF      | glutamate (NMDA) receptor epsilon                     | 0,566416667 | 0,092212665 |    |
| 457 | SFMMTPYVV      | Stress-activated protein kinase JNK1                  | 0,582216667 | 0,079071806 |    |
| 458 | PGTESFVNA      | Beta-2 adrenergic receptor                            | 0,579283333 | 0,077447125 |    |
| 459 | SDEEV          | Troponin T                                            | 0,588616667 | 0,06432088  |    |
| 460 | APQTPGGRR      | Myelin basic protein                                  | 0,555833333 | 0,058137084 |    |
| 461 | DFPLSPPKK      | stathmin                                              | 0,721733333 | 0,10280104  |    |
| 462 | FKAFSPKGS      | Actin and myosin binding protein                      | 1,434933333 | 0,19588353  | On |
| 463 | RDSNYISKG      | platelet-derived growth factor receptor               | 0,614633333 | 0,050191007 |    |
| 464 | DDEESESD       | synaptic vesicle amine transporter                    | 0,592283333 | 0,05643925  |    |
| 465 | VKRISGL        | Histone H4                                            | 0,695833333 | 0,125311707 |    |
| 466 | RRKDYPALH      |                                                       | 0,7524      | 0,070886494 |    |
| 467 | SEKKSGLG       | myelin                                                | 0,645516667 | 0,118714906 |    |
| 468 | PPSAYGSVK      | Annexin II                                            | 0,712066667 | 0,068098731 |    |
| 469 | RRFSV          | pyruvate kinase                                       | 0,90235     | 0,092039095 | On |
| 470 | STRRSVGRS      | multidrug resistance protein 1                        | 0,650333333 | 0,019290167 |    |
| 471 | TQSTSGRRR      | cAMP response element-binding protein CRE-BP2         | 0,572933333 | 0,109709878 |    |
| 472 | VNELSKDIG      | Alpha-S1 casein                                       | 0,609983333 | 0,086004267 |    |
| 473 | RAGETRFTD      | elongation factor 3                                   | 0,638533333 | 0,096904991 |    |
| 474 | SPSPSFRWP      | phosphorylcholine transferase                         | 0,6603      | 0,095539861 |    |
| 475 | RVSGSRR        | Lamin C                                               | 0,679816667 | 0,088301088 |    |
| 476 | VRLRSSVPG      | vimentin                                              | 0,6698      | 0,093593812 |    |
| 477 | SRKLSDFGQ      | Phenylalanine-4-hydroxylase                           | 0,597866667 | 0,053168887 |    |
| 478 | LSGFSFKKN      | myristolated alanine-rich C-kinase substrate          | 1,0878      | 0,073478103 | On |
| 479 | PSRRSRRS       | Lamin B receptor                                      | 0,621416667 | 0,088129226 |    |
| 480 | STDYYREGP      | TrkC tyrosine kinase                                  | 0,652033333 | 0,035125046 |    |
| 481 | TPAISPSKR      | deoxyuridine 5'-triphosphate nucleotidohydrolase      | 0,7327      | 0,077438373 |    |
| 482 | LVVASAGPT      | RNA polymerase alpha                                  | 0,65905     | 0,082838467 |    |
| 483 | PVPEYINQS      | EGF Receptor                                          | 0,726666667 | 0,109297715 |    |
| 484 | KKAESPVKE      | neurofilament triplet M                               | 0,594966667 | 0,067042155 |    |
| 485 | KSLNYIDLD      | Insulin receptor substrate 5                          | 0,79025     | 0,146627015 |    |
| 486 | KRKQISVRGL     | Glycogen phosphorylase                                | 1,285966667 | 0,229286656 | On |
| 487 | SRGDYMTMQ      | Insulin receptor substrate 6                          | 0,631783333 | 0,126194178 |    |
| 488 | KKKSGEDD       | eukaryotic translation initiation factor 4F           | 0,587033333 | 0,011829788 |    |
| 489 | KTSPSSSPA      | phosphorylcholine transferase                         | 0,651016667 | 0,031091112 |    |
| 490 | PRRRSSFGI      | Acetylcholine receptor protein gamma                  | 0,756683333 | 0,055340075 |    |
| 491 | IGSVSEDNS      | acetyl-CoA carboxylase                                | 0,654216667 | 0,046826992 |    |
| 492 | NAPVSALGE      | Myb proto-oncogene protein                            | 0,702383333 | 0,037905856 |    |
| 493 | EETPYSYPT      | Paxillin                                              | 0,733516667 | 0,101236278 |    |
| 494 | ERSPSPSFR      | phosphorylcholine transferase                         | 0,753116667 | 0,114490177 |    |
| 495 | IRKYTMRRL      | Receptor tyrosine-protein kinase erbB-2               | 0,734333333 | 0,018012511 | On |
| 496 | NEEESYSY       | RNA polymerase alpha                                  | 0,7278      | 0,104164557 |    |
| 497 | PYKFPSSPLRIPGZ |                                                       | 0,6606      | 0,073768704 |    |
| 498 | GRRQSLIED      | Tyrosine 3-monooxygenase                              | 0,949433333 | 0,126312986 | On |
| 499 | ASATSSSGG      | Glycogen [starch] synthase                            | 0,671183333 | 0,095804926 |    |
| 500 | DLPMPSPRTL     | Signal Transducer and Activator of Transcription 3    | 0,68015     | 0,108972038 |    |
| 501 | GDLQSAEFH      | Cystatin                                              | 0,74345     | 0,141634553 |    |
| 502 | GSEEMYNMD      | Insulin receptor substrate 3                          | 0,728       | 0,054960001 |    |
| 503 | EENTYDEYE      | Cortactin                                             | 0,755866667 | 0,109763088 |    |

|     |                |                                                           |             |             |    |
|-----|----------------|-----------------------------------------------------------|-------------|-------------|----|
| 504 | ERRKSHEAE      | stathmin                                                  | 0,596583333 | 0,05059042  |    |
| 505 | RRRVTSATR      | glial fibrillary acidic protein                           | 0,7287      | 0,058952707 |    |
| 506 | SKDSSKRGR      | myelin                                                    | 0,717966667 | 0,042870665 |    |
| 507 | MSVEEV         | eukaryotic translation initiation factor 4E               | 0,742216667 | 0,066640232 |    |
| 508 | AALESEDED      | eukaryotic translation initiation factor 4F               | 0,876966667 | 0,125944706 |    |
| 509 | ARKSTRRSI      | pleckstrin                                                | 1,008666667 | 0,058892789 | On |
| 510 | DLFGSDDEE      | elongation factor 1-beta                                  | 0,842483333 | 0,097463124 |    |
| 511 | FRRLSISTE      | phosphorylase b kinase alpha                              | 0,906616667 | 0,209732982 |    |
| 512 | RGAISAEVY      | cAMP-dependent protein kinase (PKA)                       | 0,69315     | 0,099651551 |    |
| 513 | RKISASEF       |                                                           | 0,705083333 | 0,051644624 |    |
| 514 | LHRASLG        | pyruvate kinase                                           | 0,694533333 | 0,111786741 |    |
| 515 | RRRPTPAML      | Dopamine- and cAMP-regulated neuronal phosphoprotein      | 0,7085      | 0,039437355 |    |
| 516 | SGYSSPGSP      |                                                           | 0,7149      | 0,074108378 |    |
| 517 | LGEGTP         | Calgranulin B                                             | 0,702883333 | 0,111134021 |    |
| 518 | RRLSSLRA       | 40S ribosomal protein S6                                  | 0,676283333 | 0,08753095  |    |
| 519 | TAESSQAE       | Neuromodulin                                              | 0,62955     | 0,109543576 |    |
| 520 | TRRASFSAQ      | Regulatory protein ADR1                                   | 1,109116667 | 0,171109236 | On |
| 521 | VSRTSAVPT      | Desmin                                                    | 0,701516667 | 0,019743114 | On |
| 522 | REQLSTSEE      | Alpha-S2 casein                                           | 0,7237      | 0,077072185 |    |
| 523 | LSYRGYSL       |                                                           | 0,6968      | 0,06980302  |    |
| 524 | KASGSSP        |                                                           | 0,689066667 | 0,074814797 |    |
| 525 | VVGGSRLGA      | Protein tyrosine phosphatase 1B                           | 0,64185     | 0,090345863 |    |
| 526 | SRRPSYRKI      | cAMP response element binding protein                     | 0,993       | 0,118569227 | On |
| 527 | PEGDYEEVL      | Hematopoietic cell-specific LYN substrate                 | 0,909916667 | 0,143413809 |    |
| 528 | QEGDTDAGL      |                                                           | 0,721433333 | 0,108283658 |    |
| 529 | SVFSSPSAS      | caldesmon                                                 | 0,817066667 | 0,181414196 |    |
| 530 | TRKISQTAQ      | ryanodine receptor                                        | 0,854133333 | 0,147403665 |    |
| 531 | PINGSPRTP      | Retinoblastoma-associated protein                         | 0,712883333 | 0,095750451 |    |
| 532 | KQISVRGL       | Glycogen phosphorylase                                    | 1,16255     | 0,18638365  | On |
| 533 | KLINSIADT      | Serine/threonine-protein kinase STE7                      | 0,763266667 | 0,106742504 |    |
| 534 | LDDQYTSSS      | Tyrosine-protein kinase Tec                               | 0,959533333 | 0,232896301 |    |
| 535 | PYDNYVPSA      | platelet-derived growth factor receptor                   | 0,79725     | 0,141137173 |    |
| 536 | SRQLSSGVS      | Heat Shock Protein 27                                     | 0,730733333 | 0,080583128 |    |
| 537 | KNIVTPRTP      | Myelin basic protein                                      | 0,67255     | 0,072539277 |    |
| 538 | LKLASPELE      | Transcription factor AP-2                                 | 0,748233333 | 0,109062133 |    |
| 539 | QLIDSMANS      | mitogen-activated protein kinase kinase 1                 | 0,697733333 | 0,101498706 |    |
| 540 | IVYKSPVVS      |                                                           | 0,69535     | 0,024789144 | On |
| 541 | NGYISAAEL      | Calmodulin                                                | 0,625816667 | 0,115891446 |    |
| 542 | EILNSPEKA      | 14-3-3 protein alpha/beta/delta/zeta                      | 0,583183333 | 0,044683747 |    |
| 543 | ESPESTEIT      | insulin-like growth factor binding protein 1              | 0,627233333 | 0,07011781  |    |
| 544 | KRPSHRAKA      | Myelin basic protein                                      | 0,7014      | 0,023639621 | On |
| 545 | NNYVYIDPT      | Mast/stem cell growth factor receptor                     | 0,641166667 | 0,016006058 |    |
| 546 | PYKFPSSPLRIPGZ |                                                           | 0,678716667 | 0,098128405 |    |
| 547 | GSPRTPRRG      | Retinoblastoma-associated protein                         | 0,738733333 | 0,07210836  |    |
| 548 | DADEYLIPQ      | EGF Receptor                                              | 0,652966667 | 0,091147951 |    |
| 549 | DRLVSARSV      | Receptor tyrosine kinase for hepatocyte growth factor     | 0,651683333 | 0,073765465 |    |
| 550 | GGLTSPGLS      | Keratin 8                                                 | 0,721916667 | 0,171152107 |    |
| 551 | GTVPSDNID      | Beta-2 adrenergic receptor                                | 0,65855     | 0,051556636 |    |
| 552 | EGSAYEEVP      | 1-phosphatidylinositol-4,5-bisphosphate phosphodiesterase | 0,656       | 0,085183811 |    |
| 553 | ESIISQETY      | Alpha-S2 casein                                           | 0,705983333 | 0,140048553 |    |
| 554 | RVRKSKGKY      | glutamate receptor 2                                      | 3,804266667 | 0,474881674 | On |
| 555 | SNDSTSVSA      | muscarinic acetylcholine receptor M2                      | 0,7202      | 0,066652719 |    |
| 556 | RRPTVA         | Protein phosphatase inhibitor 2                           | 0,5925      | 0,090061007 |    |
| 557 | AEPDYGALY      | 1-phosphatidylinositol-4,5-bisphosphate phosphodiesterase | 0,670283333 | 0,094114525 |    |
| 558 | AVASSPSKA      | myristolated alanine-rich C-kinase substrate (MARCKS)     | 0,62955     | 0,117002329 |    |
| 559 | DPGTSYRTR      | pyruvate dehydrogenase E1                                 | 0,64665     | 0,024301886 |    |

|     |               |                                                  |             |             |    |
|-----|---------------|--------------------------------------------------|-------------|-------------|----|
| 560 | GEGTYGVVY     | cell division control protein 2                  | 0,691316667 | 0,084421574 |    |
| 561 | RLRLSPSPT     | Lamin C                                          | 0,695616667 | 0,095666995 |    |
| 562 | RKASRKE       | Histone H2B                                      | 0,692866667 | 0,077246406 |    |
| 563 | LRRWSLG       | pyruvate kinase                                  | 0,669583333 | 0,094493257 |    |
| 564 | RRVTSATRR     | glial fibrillary acidic protein                  | 0,62905     | 0,04065163  |    |
| 565 | SLQASIVTD     | guanine nucleotide-binding protein alpha         | 0,6954      | 0,081127842 |    |
| 566 | RRATPA        | pyruvate kinase                                  | 0,620983333 | 0,048852317 |    |
| 567 | ADGIYAASG     | Tyrosine-protein kinase transforming protein Fes | 0,738333333 | 0,055267928 |    |
| 568 | TGDTYTAHA     | Tyrosine-protein kinase Dash/Abl                 | 0,680566667 | 0,050488437 |    |
| 569 | TVSKTETSQ     | Rhodopsin                                        | 0,648166667 | 0,071384316 |    |
| 570 | WSDTQGDE      | 14-3-3 protein zeta                              | 0,62895     | 0,047653401 |    |
| 571 | RKFSSARPE     | Sodium channel protein                           | 0,65225     | 0,035859099 |    |
| 572 | KKKKASVA      | pyruvate kinase                                  | 1,388933333 | 0,312516139 | On |
| 573 | LRRASLG       | pyruvate kinase                                  | 0,865266667 | 0,278630413 |    |
| 574 | YKNDYYRKR     | Ros proto-oncogene tyrosine kinase               | 1,6409      | 0,14138381  | On |
| 575 | SSEITTKDL     | Prothymosin                                      | 0,708433333 | 0,119467194 |    |
| 576 | PLSRTLVS      | glycogen synthase                                | 0,646916667 | 0,034863695 |    |
| 577 | LRRASLRG      | pyruvate kinase                                  | 0,677433333 | 0,059209295 |    |
| 578 | TEGQYELQP     | Tyrosine-protein kinase Blk                      | 0,657283333 | 0,096029391 |    |
| 579 | TSPSSPAS      | phosphorylcholine transferase                    | 0,705383333 | 0,047379678 |    |
| 580 | PPSAYGSVK     | Annexin II                                       | 0,717033333 | 0,073196224 |    |
| 581 | RTKRSGSV      | phosphorylase b kinase beta                      | 0,862983333 | 0,233824127 |    |
| 582 | KRFGSKAHM     | nitric-oxide synthase                            | 2,5895      | 0,18967901  | On |
| 583 | LNDSEEEED     | E7 protein                                       | 0,750783333 | 0,114528456 |    |
| 584 | QRATSNVFA     | Myosin regulatory light chain 3                  | 0,683516667 | 0,066263493 |    |
| 585 | SRSRTPSLP     |                                                  | 0,689       | 0,073059371 |    |
| 586 | KRPSARAKA     | Myelin basic protein                             | 2,301066667 | 0,40627651  | On |
| 587 | LRAPSWIDT     | Alpha crystallin B                               | 0,752016667 | 0,04841049  | On |
| 588 | QRRTSVSGE     | cAMP-dependent protein kinase                    | 0,869383333 | 0,157380358 |    |
| 589 | HATPSPVD      | Myb proto-oncogene protein                       | 0,6179      | 0,052677146 |    |
| 590 | KRPSQRAKA     | Myelin basic protein                             | 3,084983333 | 0,59121239  | On |
| 591 | EDAESEDEE     | Nucleophosmin                                    | 0,649516667 | 0,095604187 |    |
| 592 | ENAEYLRVA     | EGF Receptor                                     | 0,556566667 | 0,050245636 |    |
| 593 | HKRKSSQAL     | Transforming protein erbA                        | 0,554916667 | 0,057995838 |    |
| 594 | LAYESHESL     | Matrix Gla-protein                               | 0,59385     | 0,082171893 |    |
| 595 | PYKFPSSPLIPGZ |                                                  | 0,621833333 | 0,046176551 |    |
| 596 | GGVDYKNIH     | Macrophage colony stimulating factor I receptor  | 0,59825     | 0,093668493 |    |
| 597 | ALRPSTSRS     | vimentin                                         | 0,631283333 | 0,095022053 |    |
| 598 | DEAATKTQT     | myosin II heavy chain                            | 0,572683333 | 0,046987167 |    |
| 599 | FARKSTRRS     | pleckstrin                                       | 0,574266667 | 0,059626076 |    |
| 600 | GLGESRKDK     | myelin                                           | 0,57445     | 0,034015511 |    |
| 601 | DTHRTPSRS     | Proto-oncogene tyrosine-protein kinase Src       | 0,546483333 | 0,02897799  |    |
| 602 | EKESSNDST     | muscarinic acetylcholine receptor M2             | 0,571083333 | 0,061610339 |    |
| 603 | RRAISGDLT     | dihydropyridine-sensitive calcium channel        | 0,573683333 | 0,057893729 |    |
| 604 | SAYRSVDEV     | 2-oxoisovalerate dehydrogenase alpha             | 0,567466667 | 0,053531709 |    |
| 605 | NTVSTSLGH     | muscarinic acetylcholine receptor M2             | 0,558466667 | 0,046020581 |    |
| 606 | RASLG         |                                                  | 0,53475     | 0,069702559 |    |
| 607 | AKDASKRGR     | myelin                                           | 0,94505     | 0,120976038 | On |
| 608 | DDEASTTVS     | Rhodopsin                                        | 0,576533333 | 0,072100189 |    |
| 609 | ETAESSQAE     | Neuromodulin                                     | 0,529783333 | 0,068228346 |    |
| 610 | YTRFSLARQ     | Transferrin receptor protein 1                   | 0,5417      | 0,008560374 |    |
| 611 | SPKQSPSSS     | phosphorylcholine transferase                    | 0,604033333 | 0,07896584  |    |
| 612 | RKRSRKE       | Histone H2B                                      | 0,6442      | 0,052982702 |    |
| 613 | RPPGFSPFR     |                                                  | 0,548233333 | 0,018991241 |    |
| 614 | SARVYENVG     | Protein-tyrosine phosphatase 3                   | 0,586366667 | 0,054801799 |    |
| 615 | NRSASEPSL     | RAF proto-oncogene ser/thr-protein kinase        | 0,597616667 | 0,089211363 |    |



|     |                |                                                           |             |             |    |
|-----|----------------|-----------------------------------------------------------|-------------|-------------|----|
| 616 | KGYSLG         | Lysozyme C                                                | 0,609516667 | 0,032264437 |    |
| 617 | SSSSSPKAE      | myristolated alanine-rich C-kinase substrate (MARCKS)     | 0,5374      | 0,030298872 |    |
| 618 | TKKTSFVNF      | eukaryotic translation initiation factor 2 beta           | 0,709883333 | 0,0698455   |    |
| 619 | VEPLTPSGE      | EGF Receptor                                              | 0,559783333 | 0,038206835 |    |
| 620 | YRLPSNVQ       | Alpha crystallin A                                        | 0,581333333 | 0,055360174 |    |
| 621 | SPAISIHEI      | phosphorylase b kinase alpha                              | 0,644566667 | 0,014361774 |    |
| 622 | RKQISVR        | Glycogen phosphorylase                                    | 0,892233333 | 0,092486047 | On |
| 623 | VGWPTVRER      | Nef                                                       | 0,6013      | 0,049401687 |    |
| 624 | QTYRSFHD       | cGMP-dependent protein kinase (PKG)                       | 0,602833333 | 0,079290409 |    |
| 625 | LRRASLGAA      | pyruvate kinase                                           | 0,65955     | 0,094065615 |    |
| 626 | PRKGSPPRG      | Histone H2B.2                                             | 0,6005      | 0,054261696 |    |
| 627 | SSPASLSRA      | phosphorylcholine transferase                             | 0,560166667 | 0,050489047 |    |
| 628 | TKAASEKKS      | myelin                                                    | 0,5986      | 0,081028277 |    |
| 629 | LRRPSDQEV      | c-Rel proto-oncogene protein                              | 0,62555     | 0,087344729 |    |
| 630 | PSAPSPQPK      | Tyrosine 3-monooxygenase                                  | 0,569366667 | 0,012496488 |    |
| 631 | KAKVTGRWK      | troponin T                                                | 2,64545     | 0,090793842 | On |
| 632 | KRPTQRAKY      | Myelin basic protein                                      | 0,619916667 | 0,090163789 |    |
| 633 | PLSRTLVRSL     | Glycogen [starch] synthase                                | 0,562316667 | 0,037005548 |    |
| 634 | QSPGSPLEE      | Neutrophil cytosol factor 5                               | 0,617366667 | 0,058244461 |    |
| 635 | KGGYSQAA       | HLA class I histocompatibility antigen B7                 | 0,599983333 | 0,076484991 |    |
| 636 | KRRRSSKDT      | glutamate (NMDA) receptor subunit zeta 4                  | 0,521633333 | 0,074606683 |    |
| 637 | KAQISVRGL      | Glycogen phosphorylase                                    | 0,712566667 | 0,112267132 |    |
| 638 | HRTPSRSFG      | Proto-oncogene tyrosine-protein kinase Src                | 0,6124      | 0,062178614 |    |
| 639 | LSGFSPKKN      | myristolated alanine-rich C-kinase substrate              | 1,06845     | 0,112005945 | On |
| 640 | EEEEYMPME      | Middle T antigen                                          | 0,577983333 | 0,088552521 |    |
| 641 | EQFSTVKGV      | G protein-coupled receptor kinase 6                       | 0,551383333 | 0,010170573 |    |
| 642 | IDKISRIGF      | glycine receptor alpha                                    | 0,617016667 | 0,057069933 |    |
| 643 | MHRQETVDA      | calcium/calmodulin-dependent protein kinase type II alpha | 0,571933333 | 0,032612787 |    |
| 644 | PYKFPSSPLRIPGZ |                                                           | 0,66125     | 0,039245658 |    |
| 645 | GNHTYQEIA      | Paxillin                                                  | 0,6084      | 0,065315401 |    |
| 646 | APVASPAAP      | synapsins IA and IB                                       | 0,596466667 | 0,042841206 |    |
| 647 | DGNNSEDES      | calsequestrin                                             | 0,593533333 | 0,076739922 |    |
| 648 | FMTEYVVTR      | mitogen-activated protein kinase MSK7                     | 0,71235     | 0,128312126 |    |
| 649 | GRGLSLSRF      | Myelin basic protein                                      | 0,581166667 | 0,063196945 |    |
| 650 | EDTLSDSDD      | N-myc proto-oncogene protein                              | 0,631933333 | 0,060950763 |    |
| 651 | ENQASEEED      | Dopamine- and cAMP-regulated neuronal phosphoprotein      | 0,633383333 | 0,047683546 |    |
| 652 | RRPTSPVSR      | Early E1A                                                 | 0,625766667 | 0,055544012 |    |
| 653 | SFMDSSGLG      | anti-sigma F factor antagonist                            | 0,61355     | 0,061275457 |    |
| 654 | QKRPSQRSK      | Myelin basic protein                                      | 0,69785     | 0,068192241 |    |
| 655 | SDEEH          | initiation factor 5A                                      | 0,609933333 | 0,042509496 |    |
| 656 | APLTPGGRR      | Myelin basic protein                                      | 0,5893      | 0,054461102 |    |
| 657 | DEPSTPYHS      | Protein phosphatase inhibitor 2                           | 0,593166667 | 0,051464961 |    |
| 658 | FGSRSLYGL      | keratin, type II                                          | 0,66935     | 0,060890489 |    |
| 659 | RDPVTENAV      | muscarinic acetylcholine receptor M2                      | 0,65115     | 0,032720814 |    |
| 660 | AVRRSDRA       | Troponin I                                                | 0,567366667 | 0,059303771 |    |
| 661 | VKRGSGL        | Histone H4                                                | 0,608716667 | 0,01709095  |    |
| 662 | RRKDTPALH      |                                                           | 0,557216667 | 0,033677647 |    |
| 663 | SEITTKDLK      | Prothymosin                                               | 0,566716667 | 0,024193881 |    |
| 664 | PNVSYIASR      | protein kinase shaggy                                     | 0,708516667 | 0,084574724 |    |
| 665 | RRDSV          | pyruvate kinase                                           | 0,912033333 | 0,160711348 |    |
| 666 | STRRSIRLP      | pleckstrin                                                | 0,74215     | 0,08916009  |    |
| 667 | TPQVSDTMR      | glycogenin                                                | 0,589533333 | 0,016522779 |    |
| 668 | VNATYVNVK      | Receptor tyrosine kinase for hepatocyte growth factor     | 0,610883333 | 0,063984651 |    |
| 669 | RAAHSIKGG      | Chemotaxis protein cheA                                   | 0,543483333 | 0,03513157  |    |
| 670 | SPSLSRHSS      | Glycogen [starch] synthase                                | 0,635416667 | 0,055594279 |    |
| 671 | RTPPPSG        | Myelin basic protein                                      | 0,591916667 | 0,040437242 |    |



|     |                |                                                         |             |             |    |
|-----|----------------|---------------------------------------------------------|-------------|-------------|----|
| 672 | VRKRTLRL       | EGF Receptor                                            | 0,665683333 | 0,076080378 |    |
| 673 | SRKSGFGH       | gap junction beta-1 protein                             | 0,828516667 | 0,127141557 |    |
| 674 | LSGESDLEI      | DNA topoisomerase II                                    | 0,715766667 | 0,057319519 |    |
| 675 | PSQRSKYLA      | Myelin basic protein                                    | 0,602916667 | 0,053232671 |    |
| 676 | STDEYLDLS      | Receptor tyrosine kinase                                | 0,72855     | 0,033506218 | On |
| 677 | TNHIYNLA       | Mast/stem cell growth factor receptor                   | 0,67355     | 0,028219763 |    |
| 678 | LSRHSSPHQ      | Glycogen [starch] synthase                              | 0,637333333 | 0,037063287 |    |
| 679 | PTRHSRVAE      | Lamin                                                   | 0,65925     | 0,082876806 |    |
| 680 | KISITSRKA      | GTP-binding protein era                                 | 1,6336      | 0,298086978 | On |
| 681 | KSKISASRK      | troponin I                                              | 2,368383333 | 0,863770449 | On |
| 682 | KRKQISVGG      | Glycogen phosphorylase                                  | 1,241733333 | 0,375905745 |    |
| 683 | SRALSRQLS      | Heat Shock Protein 27                                   | 0,710333333 | 0,130466658 |    |
| 684 | KKKFSFKKP      | MARCKS-related protein                                  | 1,88445     | 0,211636119 | On |
| 685 | KTRSSRAGL      | Histone H2A                                             | 0,7134      | 0,096760452 |    |
| 686 | PAPGSPEPP      | Early E1A                                               | 0,684366667 | 0,121553619 |    |
| 687 | IGSESTEDQ      | Alpha-S1 casein                                         | 0,63735     | 0,060949337 |    |
| 688 | MRRNSFTPL      | fructose-2,6-bisphosphatase                             | 0,8879      | 0,113170292 | On |
| 689 | EEQEYVQTV      | Annexin I                                               | 0,699633333 | 0,091235723 |    |
| 690 | ERRVSNAGG      | vasodilator-stimulated phosphoprotein                   | 0,76885     | 0,139014861 |    |
| 691 | IREESPPHS      | Glycoprotein IV                                         | 0,684766667 | 0,080033122 |    |
| 692 | NDSVYANWM      | Probable receptor with tyrosine-protein kinase activity | 0,679683333 | 0,04844826  |    |
| 693 | PYKFPSSPLRIPGZ |                                                         | 0,659933333 | 0,117239245 |    |
| 694 | GRRESLTSF      | inositol 1,4,5-trisphosphate-binding protein            | 1,00035     | 0,145135643 | On |
| 695 | ARVFSVLRE      | Ser/Thr poetin phosphatase 2B                           | 0,707466667 | 0,051864605 |    |
| 696 | DLPLPSAF       | tristetraproline                                        | 0,746983333 | 0,105734655 |    |
| 697 | GDKKSKKAK      | Na+/K+ ATPase 1                                         | 0,92565     | 0,313752548 |    |
| 698 | GSDVSFNEE      | DNA topoisomerase II                                    | 0,770333333 | 0,049713485 | On |
| 699 | EEKGSPLNA      | Protein tyrosine phosphatase 1B                         | 0,6753      | 0,13708746  |    |
| 700 | ERQKTQTKL      | myosin light chain kinase                               | 0,6186      | 0,092115905 |    |
| 701 | RRRSSKDTS      | glutamate (NMDA) receptor subunit zeta 3                | 0,764566667 | 0,077226661 |    |
| 702 | SKAGSLGNI      |                                                         | 0,72395     | 0,113212131 |    |
| 703 | MSGDEM         | eukaryotic translation initiation factor 2 beta         | 0,683916667 | 0,136104031 |    |
| 704 | AAATTPAAE      | neuromodulin                                            | 0,670066667 | 0,093227342 |    |
| 705 | ARKKSSAQL      | ras-related protein rap-1b                              | 0,759033333 | 0,079600925 |    |
| 706 | DKVTSPTKV      | caldesmon                                               | 0,642816667 | 0,116418185 |    |
| 707 | FRRFTPDSL      | Sodium channel protein                                  | 0,70435     | 0,13260274  |    |
| 708 | RFTDTRKDE      | elongation factor 4                                     | 0,6992      | 0,072177016 |    |
| 709 | RKISASEA       |                                                         | 0,641816667 | 0,114148371 |    |
| 710 | LARASLG        | pyruvate kinase                                         | 0,720733333 | 0,061395607 |    |
| 711 | RRRLSSLRA      | 40S ribosomal protein S6                                | 0,76525     | 0,054011125 | On |
| 712 | SGYISSLEY      | Complement C1r                                          | 0,869483333 | 0,139724779 |    |
| 713 | LARNSI         | cystic fibrosis transmembrane conductance regulator     | 0,659783333 | 0,135444431 |    |
| 714 | TIAVG          | Photosystem Q(A)                                        | 0,732533333 | 0,155542713 |    |
| 715 | TADISEDEE      | phosphorylcholine transferase                           | 0,704583333 | 0,075347355 |    |
| 716 | TRQTSVSGQ      | synapsins IA and IB                                     | 0,709966667 | 0,092731353 |    |
| 717 | VSEEYDLDR      | Fibroblast growth factor receptor 4                     | 0,828283333 | 0,100165832 |    |
| 718 | REQESSGEE      | Protein phosphatase inhibitor 2                         | 0,7066      | 0,095127625 |    |
| 719 | GTKRSGSV       | phosphorylase b kinase beta                             | 0,740866667 | 0,127369308 |    |
| 720 | NRLQTMKEE      | Lamin C                                                 | 0,635166667 | 0,101402707 |    |
| 721 | VVELSGESD      | DNA topoisomerase II                                    | 0,7679      | 0,111676385 |    |
| 722 | SRRPSRATW      | Vitronectin                                             | 0,88415     | 0,035476847 | On |
| 723 | PASQTPNKT      | Proto-oncogene tyrosine-protein kinase Src              | 0,694       | 0,103788399 |    |
| 724 | QDPVSPSLV      | muscarinic acetylcholine receptor M2                    | 0,722666667 | 0,167451338 |    |
| 725 | STTVSKTET      | Rhodopsin                                               | 0,7431      | 0,138628574 |    |
| 726 | TRKISASEF      |                                                         | 0,77535     | 0,126448863 |    |
| 727 | PGPQSPGSP      | Neutrophil cytosol factor 4                             | 0,65135     | 0,104432809 |    |

|     |                |                                                         |             |             |    |
|-----|----------------|---------------------------------------------------------|-------------|-------------|----|
| 728 | KQGSGRGL       | Glycogen phosphorylase                                  | 0,672066667 | 0,101655319 |    |
| 729 | KKSWSRWTL      | parathyroid hormone/parathyroid hormone-related peptide | 3,393466667 | 0,411145995 | On |
| 730 | LASSSKEEN      | Cystatin S                                              | 0,768183333 | 0,076792549 |    |
| 731 | PLRRTLVA       | glycogen synthase                                       | 0,73075     | 0,13392002  |    |
| 732 | SRPSSNRSY      | vimentin                                                | 0,81635     | 0,149214962 |    |
| 733 | KNDYYRKRK      | Ros proto-oncogene tyrosine kinase                      | 1,604333333 | 0,257662513 | On |
| 734 | LIEDAEYTA      | Proto-oncogene tyrosine-protein kinase Lck, Fyn, Yes    | 0,88445     | 0,164703132 |    |
| 735 | QKAQTERKS      | troponin T                                              | 0,6983      | 0,051958269 |    |
| 736 | ISTESQPNG      | phosphorylase b kinase alpha                            | 0,670966667 | 0,053210624 |    |
| 737 | NGNNYVYID      | Mast/stem cell growth factor receptor                   | 0,6919      | 0,049569261 |    |
| 738 | EIKKSWSRW      | parathyroid hormone/parathyroid hormone-related peptide | 0,72835     | 0,087787841 |    |
| 739 | ESPASDEAE      | Nonhistone chromosomal protein HMG-14                   | 0,678966667 | 0,046564298 |    |
| 740 | KRKSSQALV      | Transforming protein erbA                               | 0,944683333 | 0,093948003 | On |
| 741 | NNMPSSDDG      | muscarinic acetylcholine receptor M2                    | 0,640566667 | 0,037614034 |    |
| 742 | PYKFPSSPLRIPGZ |                                                         | 0,643016667 | 0,015653825 |    |
| 743 | GSPGTPGSR      |                                                         | 0,633833333 | 0,049864923 |    |
| 744 | AVVRTPPKS      |                                                         | 1,094633333 | 0,231649147 |    |
| 745 | DRKLSTKEA      | multidrug resistance protein 2                          | 0,626866667 | 0,155064945 |    |
| 746 | GGIRSLNVA      | isocitrate dehydrogenase                                | 0,708233333 | 0,107787138 |    |
| 747 | GTRLRLARM      | glial fibrillary acidic protein                         | 0,6715      | 0,10698267  |    |
| 748 | EGNKSPAPK      | Actin and myosin binding protein                        | 0,61565     | 0,099640613 |    |
| 749 | ESHESMESY      | Matrix Gla-protein                                      | 0,657766667 | 0,112202127 |    |
| 750 | RVRISADAM      | Troponin I                                              | 0,585716667 | 0,066657049 |    |
| 751 | SNDDSDDDD      | casequestrin                                            | 0,65985     | 0,055735491 |    |
| 752 | RRPTPA         | Protein phosphatase inhibitor 3                         | 0,6069      | 0,06767172  |    |
| 753 | AEGSSNVFS      | Myosin regulatory light chain 2                         | 0,613633333 | 0,073311645 |    |
| 754 | AVADSESED      | cAMP-dependent protein kinase II (PKA)                  | 0,66585     | 0,102832639 |    |
| 755 | DNPDYQQDF      | EGF Receptor                                            | 0,615366667 | 0,077340646 |    |
| 756 | GDVKYADIE      | platelet-derived growth factor receptor                 | 0,660583333 | 0,093397041 |    |
| 757 | RLQDYEEKT      | Connection of cytoskeletal structure to plasma membrane | 0,663083333 | 0,067725701 |    |
| 758 | FKKSFKL        | myristolated alanine-rich C-kinase substrate            | 2,587233333 | 0,431730057 | On |
| 759 | LRRPSLG        | pyruvate kinase                                         | 0,827933333 | 0,191624047 |    |
| 760 | RRVRSQEPG      | somatostatin receptor type 4                            | 0,65495     | 0,052554083 |    |
| 761 | SLDDSGSAM      | alpha-1B adrenergic receptor                            | 0,619       | 0,123996579 |    |
| 762 | RRASVA         | pyruvate kinase                                         | 0,7797      | 0,184668988 |    |
| 763 | ADDEYAPKQ      | Tyrosine-protein kinase Src64B                          | 0,643083333 | 0,080650174 |    |
| 764 | TESQYQQQP      | Tyrosine-protein kinase Hck                             | 0,669966667 | 0,046492694 |    |
| 765 | TVKSSKGGP      | Annexin I                                               | 0,6844      | 0,069995083 |    |
| 766 | WTSDSAGEE      | 14-3-3 protein tau                                      | 0,689083333 | 0,07337835  |    |
| 767 | RKAASVIAK      | DNA polymerase beta                                     | 1,454433333 | 0,279323326 | On |
| 768 | LRRASLDG       | pyruvate kinase                                         | 0,732533333 | 0,191777503 |    |
| 769 | LRRASGG        | pyruvate kinase                                         | 0,667233333 | 0,071941658 |    |
| 770 | YHTTSHPGT      | Band 3 anion transport protein                          | 0,672816667 | 0,041587605 |    |
| 771 | SSEESITRI      | Beta casein                                             | 0,6543      | 0,044628317 |    |
| 772 | PLAGSPVIA      | casein kinase II                                        | 0,675616667 | 0,052638537 |    |
| 773 | LGSPLRRR       | vimentin                                                | 0,6213      | 0,067978023 |    |
| 774 | TEDQYSLVE      | PI3-kinase p85-alpha                                    | 0,708183333 | 0,066427709 |    |
| 775 | TRTYSLGSA      | vimentin                                                | 0,619566667 | 0,06991848  |    |
| 776 | PPSAYATVK      | Annexin II                                              | 0,630166667 | 0,059707961 |    |
| 777 | RTKRSGSV       | phosphorylase b kinase beta                             | 0,7922      | 0,098454126 |    |
| 778 | KREASLDNQ      | Phytochrome A                                           | 0,624733333 | 0,021516092 |    |
| 779 | LMDKYHVDN      | Early E2A                                               | 0,651033333 | 0,097389907 |    |
| 780 | QQGMTVYGL      | calponin alpha and beta                                 | 0,659816667 | 0,11459497  |    |
| 781 | SRSRSRSRS      | Lamin B receptor                                        | 0,690933333 | 0,062581445 |    |
| 782 | KRNSSPPPS      |                                                         | 0,592516667 | 0,06351289  |    |
| 783 | LQRYSSDPT      | EGF Receptor                                            | 0,643516667 | 0,011514218 |    |

|     |                |                                                          |             |             |    |
|-----|----------------|----------------------------------------------------------|-------------|-------------|----|
| 784 | QRRTSLTGS      | Volt.-dep. L-type calcium channel alpha-1S               | 0,859183333 | 0,171579041 |    |
| 785 | GVRQSRASD      | T-cell surface glycoprotein CD3 gamma                    | 0,569966667 | 0,081405061 |    |
| 786 | KRPSNRAKA      | Myelin basic protein                                     | 1,54345     | 0,072849171 | On |
| 787 | EAVTSPRFI      | Tyrosine 3-monooxygenase                                 | 0,537666667 | 0,025174105 |    |
| 788 | EMTGYVATR      | Mitogen-activated protein kinase p38                     | 0,524233333 | 0,066949251 |    |
| 789 | HKIKSGAEA      | DNA polymerase beta                                      | 0,5622      | 0,055296157 |    |
| 790 | LARRSTTDA      | Choriogonadotropin beta                                  | 0,6058      | 0,069766265 |    |
| 791 | PYKFPSSPLRIPGZ |                                                          | 0,556016667 | 0,069434313 |    |
| 792 | GGTGTPNKE      | Actin and myosin binding protein                         | 0,51975     | 0,024957197 |    |
| 793 | ALGISYGRK      | TAT protein                                              | 1,11125     | 0,230686989 | On |
| 794 | DDSGSAMSG      | alpha-1B adrenergic receptor                             | 0,554233333 | 0,035643193 |    |
| 795 | EYVQTVKSS      | Annexin I                                                | 0,602016667 | 0,074423454 |    |
| 796 | GKTDYMGEA      | Beta-2 adrenergic receptor                               | 0,683083333 | 0,096762031 |    |
| 797 | DSTYYKASK      | Focal adhesion kinase                                    | 0,61915     | 0,065300089 |    |
| 798 | EKEISDDEA      | Heat Shock Protein 90-beta                               | 0,597533333 | 0,129259702 |    |
| 799 | RRADSLQKN      | iron-responsive element binding protein                  | 0,541816667 | 0,028688161 |    |
| 800 | SAYGSVKAY      | Annexin II                                               | 0,60015     | 0,041661913 |    |
| 801 | NTSSSPQPK      | p53                                                      | 0,623816667 | 0,035628484 |    |
| 802 | GSRRR          | protamine                                                | 0,732783333 | 0,016082098 | On |
| 803 | AKAKTTKKR      | Myosin regulatory light chain 2                          | 3,89925     | 0,625636413 | On |
| 804 | DDAYSDET       | Protein phosphatase inhibitor 2                          | 0,703516667 | 0,074805329 |    |
| 805 | ESVDYVPM       | platelet-derived growth factor receptor                  | 0,584733333 | 0,049835401 |    |
| 806 | YSTDYREG       | TrkC tyrosine kinase                                     | 0,620616667 | 0,044853267 |    |
| 807 | SPKKSPRKA      | Histone H4                                               | 1,878466667 | 0,579896043 | On |
| 808 | RKRSRKA        | Histone H2B                                              | 0,92585     | 0,059184626 | On |
| 809 | RPPASPSQ       | synapsins IA and IB                                      | 0,7018      | 0,073248936 |    |
| 810 | SARLSAKPA      | Nonhistone chromosomal protein HMG-14                    | 0,695266667 | 0,10990854  |    |
| 811 | NRQSSQARV      | Phytochrome A                                            | 0,620166667 | 0,055962701 |    |
| 812 | KEAKSD         | Nonhistone chromosomal protein HMG-14                    | 0,620066667 | 0,029048073 |    |
| 813 | SSSNTIRRP      | fructose-2,6-bisphosphatase                              | 0,52325     | 0,020230711 |    |
| 814 | TKKQSFQKT      | cystic fibrosis transmembrane conductance regulator      | 1,432933333 | 0,094250078 | On |
| 815 | VDSAYEVIK      | L-lactate dehydrogenase M                                | 0,754933333 | 0,067955038 |    |
| 816 | YRKSSLKSR      | spermatid nuclear transition protein 3                   | 3,794416667 | 0,507312767 | On |
| 817 | SNVSSTGSI      |                                                          | 0,709033333 | 0,099024781 |    |
| 818 | RARSRKE        | Histone H2B                                              | 0,64645     | 0,045381549 |    |
| 819 | VGPGYLGSG      | Probable receptor with tyrosine-protein kinase activity  | 0,537983333 | 0,069930517 |    |
| 820 | QTVKSSKGG      | Annexin I                                                | 0,542883333 | 0,021556605 |    |
| 821 | LRMFSFKAP      | Gamma-aminobutyric-acid receptor gamma-2                 | 0,65905     | 0,083529067 |    |
| 822 | PRHLSNVSS      |                                                          | 0,594816667 | 0,072370578 |    |
| 823 | SSNEYMDMK      | Mast/stem cell growth factor receptor                    | 0,694866667 | 0,099192576 |    |
| 824 | THYGSLPQK      | Myelin basic protein                                     | 0,547733333 | 0,04939017  |    |
| 825 | LRRPSDQAV      | Transforming protein rel                                 | 0,6056      | 0,069702092 |    |
| 826 | PRRNSRASL      | Sodium channel protein type II alpha                     | 0,561733333 | 0,061737027 |    |
| 827 | KAKTTKKRP      | Myosin regulatory light chain 2                          | 2,443516667 | 0,603450924 | On |
| 828 | KRPSGRAKA      | Myelin basic protein                                     | 0,628366667 | 0,04378916  |    |
| 829 | PLSKTSLVSSL    | Glycogen [starch] synthase                               | 0,610133333 | 0,073332193 |    |
| 830 | QSGMTEYVA      | Mitogen-activated protein kinase FUS3                    | 0,586183333 | 0,066064266 |    |
| 831 | KGATSDEED      | DNA topoisomerase II                                     | 0,59435     | 0,058983444 |    |
| 832 | KRRNSEFEI      | tryptophan 5-monooxygenase                               | 0,670233333 | 0,087188879 |    |
| 833 | LTRRASFSAQ     | Regulatory protein ADR1                                  | 0,705783333 | 0,175856273 |    |
| 834 | HRQETVEAL      | calcium/calmodulin-dependent protein kinase type II beta | 0,574316667 | 0,030616372 |    |
| 835 | LRRFSLATM      | Cytochrome P450 2B1                                      | 0,656533333 | 0,139758568 |    |
| 836 | EEEAYGWMD      | Gastrin                                                  | 0,6594      | 0,103631615 |    |
| 837 | EQESSGEED      | Protein phosphatase inhibitor 2                          | 0,5944      | 0,057253573 |    |
| 838 | IAADSEAEQ      | Insulin receptor substrate 7                             | 0,575316667 | 0,038463756 |    |
| 839 | MGEASGAQL      | Beta-2 adrenergic receptor                               | 0,624616667 | 0,117786532 |    |

|     |                |                                                         |             |             |    |
|-----|----------------|---------------------------------------------------------|-------------|-------------|----|
| 840 | PYKFPSSPLRIPGZ |                                                         | 0,604016667 | 0,046060057 |    |
| 841 | GNGDYMPMS      | Insulin receptor substrate 8                            | 0,581616667 | 0,04493915  |    |
| 842 | APRYPGGRR      | Myelin basic protein                                    | 0,577216667 | 0,034434487 |    |
| 843 | DGNKSPAPK      | caldesmon                                               | 0,54865     | 0,069243134 |    |
| 844 | FMTEYVATR      | mitogen-activated protein kinase                        | 0,6089      | 0,055278447 |    |
| 845 | GRASSHSSQ      | Lamin C                                                 | 0,596533333 | 0,037617401 |    |
| 846 | EDSTYYKAS      | Focal adhesion kinase                                   | 0,661666667 | 0,13860801  |    |
| 847 | ENPQYFRQG      | TrkC tyrosine kinase                                    | 0,646866667 | 0,025413656 |    |
| 848 | RRPTPATVA      | Protein phosphatase inhibitor 4                         | 0,61395     | 0,195205674 |    |
| 849 | SFKLSGFSF      | myristolated alanine-rich C-kinase substrate            | 0,566533333 | 0,069544546 |    |
| 850 | QEKESERLA      | Beta-2 adrenergic receptor                              | 0,56315     | 0,032228326 |    |
| 851 | RRVSV          | pyruvate kinase                                         | 0,630566667 | 0,066981594 |    |
| 852 | APFTPGGRR      | Myelin basic protein                                    | 0,577216667 | 0,078588934 |    |
| 853 | DEKLSEILG      | RNA polymerase alpha                                    | 0,648983333 | 0,060928706 |    |
| 854 | FGHNTIDAV      | bumetanide-sensitive sodium-(potassium)-chloride cotran | 0,65525     | 0,038292319 |    |
| 855 | RDEEYGYEA      | Gamma-aminobutyric-acid receptor gamma-2                | 1,225933333 | 0,979098766 |    |
| 856 | AVRRSDAA       | Troponin I                                              | 0,6129      | 0,071468909 |    |
| 857 | TKRSGSV        | phosphorylase b kinase beta                             | 0,672616667 | 0,040254386 |    |
| 858 | RRKATQVGE      | vasodilator-stimulated phosphoprotein                   | 0,583716667 | 0,061164564 |    |
| 859 | SEGDSSEGE      | Serum response factor                                   | 0,568683333 | 0,064592316 |    |
| 860 | PLDRSSHAQ      | Insulin Receptor (IR)                                   | 0,610883333 | 0,074625469 |    |
| 861 | RRASS          | pyruvate kinase                                         | 0,683733333 | 0,110036587 |    |
| 862 | STPLSPTRI      | Lamin A/C                                               | 0,586516667 | 0,092338375 |    |
| 863 | TPPLSPSRR      | Myc proto-oncogene protein                              | 0,614766667 | 0,121637935 |    |
| 864 | VKRISGLIY      | Histone H4                                              | 0,765516667 | 0,147471705 |    |
| 865 | RAAASRARQ      | cAMP response element-binding protein CRE-BP3           | 0,572933333 | 0,060658997 |    |
| 866 | SPRTPGGRR      | Myelin basic protein                                    | 0,6089      | 0,058785727 |    |
| 867 | RRRRSVA        | pyruvate kinase                                         | 0,69725     | 0,094836421 |    |
| 868 | VRFESIRLP      | Choriogonadotropin beta                                 | 0,677966667 | 0,051746922 |    |
| 869 | SRKESYSVY      | Histone H2B                                             | 0,686133333 | 0,070329016 |    |
| 870 | LSELSRRRI      | eukaryotic translation initiation factor 4F             | 0,5627      | 0,053600249 |    |
| 871 | PSPSSRVTV      | Lamin B1                                                | 0,627616667 | 0,067494819 |    |
| 872 | SSVPTPSPL      | casein kinase II                                        | 0,5555      | 0,06611369  |    |
| 873 | TNEEYLDLS      | Fibroblast growth factor receptor 2                     | 0,61635     | 0,040997378 |    |
| 874 | LSRFSWGAE      | Myelin basic protein                                    | 0,649016667 | 0,025080349 |    |
| 875 | PTKRSPTKR      | Histone H2B.1                                           | 0,604033333 | 0,104826876 |    |
| 876 | KISASRLQ       | troponin I                                              | 1,567833333 | 0,217617008 | On |
| 877 | KSFGSPNRI      | cell division protein kinase 7                          | 0,73425     | 0,141148616 |    |
| 878 | KRKQISVAGL     | Glycogen phosphorylase                                  | 0,996516667 | 0,107036881 | On |
| 879 | SQHSTPPKK      | Large T antigen                                         | 0,5748      | 0,058333395 |    |
| 880 | KKIDSFASN      | acetyl-CoA carboxylase                                  | 0,525816667 | 0,044143409 |    |
| 881 | KTETSQVAP      | Rhodopsin                                               | 0,549933333 | 0,060284773 |    |
| 882 | PAAPSPGSS      | synapsins IA and IB                                     | 0,619833333 | 0,059380936 |    |
| 883 | IGRFSEPHA      | cGMP-dependent protein kinase (PKG)                     | 0,707316667 | 0,089504137 |    |
| 884 | MQLKSEIKQ      | phosphorylase b kinase alpha                            | 0,6643      | 0,086072034 |    |
| 885 | EEQEYIKTV      | Annexin I                                               | 0,681083333 | 0,079591879 |    |
| 886 | ERRPSNVSQ      | Sodium channel protein type II alpha                    | 0,728516667 | 0,149925439 |    |
| 887 | IPHPTVRT       | Retinoblastoma-associated protein                       | 0,678783333 | 0,075387414 |    |
| 888 | NDSTSVSAV      | muscarinic acetylcholine receptor M2                    | 0,64895     | 0,124456365 |    |
| 889 | PYKFPSSPLRIPGZ |                                                         | 0,642616667 | 0,142584369 |    |
| 890 | GRPITPPRN      | ser/thr protein phosphatase PP1-alpha                   | 0,650766667 | 0,031131772 |    |
| 891 | ARTKRSGSV      | phosphorylase b kinase beta                             | 0,909583333 | 0,159902847 |    |
| 892 | DLPGTEDFV      | Beta-2 adrenergic receptor                              | 0,721       | 0,068146069 |    |
| 893 | GALYSGSEG      | Serum response factor                                   | 0,672916667 | 0,042520864 |    |
| 894 | GRVLTLP RS     | Insulin Receptor (IR)                                   | 0,681416667 | 0,129233834 |    |
| 895 | EKESNSDS       | muscarinic acetylcholine receptor M2                    | 0,68475     | 0,062135551 |    |

|     |                |                                                          |             |             |    |
|-----|----------------|----------------------------------------------------------|-------------|-------------|----|
| 896 | ERNLSFEIK      | protein-tyrosine phosphatase G1                          | 0,676166667 | 0,123311025 |    |
| 897 | RRRRSRRAS      | Protamine Z                                              | 0,641166667 | 0,143153335 |    |
| 898 | SIYSSDDDE      | Myb proto-oncogene protein                               | 0,7979      | 0,146678566 |    |
| 899 | HGYSLG         | Lysozyme C                                               | 0,70955     | 0,060496295 |    |
| 900 | AAASFKAQR      |                                                          | 0,84455     | 0,149522914 |    |
| 901 | ARKFSSARP      | Sodium channel protein                                   | 0,68835     | 0,070667814 |    |
| 902 | DKEYYSVHN      | Receptor tyrosine kinase for hepatocyte growth factor    | 0,670033333 | 0,143237683 |    |
| 903 | FRKLSFTES      |                                                          | 0,699983333 | 0,154055106 |    |
| 904 | RFHKSSKDS      | myelin                                                   | 0,651733333 | 0,056485829 |    |
| 905 | RAKRSGSV       | phosphorylase b kinase beta                              | 0,740316667 | 0,122318991 |    |
| 906 | KSESSQK        | 40S ribosomal protein S6                                 | 0,701816667 | 0,095360547 |    |
| 907 | RRRLSDSNF      | synapsins                                                | 0,740283333 | 0,138169306 |    |
| 908 | SGKTSPSSS      | phosphorylcholine transferase                            | 0,6705      | 0,053332307 |    |
| 909 | KSRRTI         | Interleukin-2 receptor alpha                             | 0,7284      | 0,089997954 |    |
| 910 | TAILE          | Photosystem Q(B)                                         | 0,690983333 | 0,083398984 |    |
| 911 | SYPLSPLSD      | Cytosolic phospholipase A2                               | 0,757266667 | 0,120331669 |    |
| 912 | TRQASQAGP      | synapsins IA and IB                                      | 0,677566667 | 0,050779414 |    |
| 913 | VRVYTHEVV      | cell division control protein 2                          | 0,751       | 0,060109941 |    |
| 914 | RENEYMPMA      | Middle T antigen                                         | 0,666466667 | 0,082058275 |    |
| 915 | GRGLSLSR       | Myelin basic protein                                     | 0,64705     | 0,103768806 |    |
| 916 | YIYGSFK        |                                                          | 0,6841      | 0,095634783 |    |
| 917 | VTRSSAVRL      | vimentin                                                 | 0,78885     | 0,094071356 |    |
| 918 | SRRLSQETG      | cystic fibrosis transmembrane conductance regulator      | 0,703083333 | 0,069618895 |    |
| 919 | PASPSPQRQ      | synapsins IA and IB                                      | 0,711783333 | 0,112482031 |    |
| 920 | PWRITDNEL      | bumetanide-sensitive sodium-(potassium)-chloride cotran: | 0,749766667 | 0,103376128 |    |
| 921 | STSVSAVAS      | muscarinic acetylcholine receptor M2                     | 0,770466667 | 0,142651746 |    |
| 922 | TRIPSAKKY      | astrocytic phosphoprotein PEA-15                         | 0,8202      | 0,15589744  |    |
| 923 | PGGSTPVSS      | casein kinase II                                         | 0,705883333 | 0,091993735 |    |
| 924 | QGTLKIFK       | Myelin basic protein                                     | 0,81745     | 0,133431805 |    |
| 925 | KKRLSVERI      | DNA topoisomerase II alpha                               | 1,717916667 | 0,339794478 | On |
| 926 | KYRKSSLKS      | spermatid nuclear transition protein 4                   | 3,232216667 | 0,424587094 | On |
| 927 | PLSRRLSVA      | glycogen synthase                                        | 0,936183333 | 0,173717281 |    |
| 928 | SRLHSVRER      | sucrose synthase 2                                       | 0,664183333 | 0,125255129 |    |
| 929 | KNDKSKTWQ      | eukaryotic translation initiation factor 4E              | 0,614066667 | 0,049619105 |    |
| 930 | LGGGTFDIS      | Heat Shock Protein 70                                    | 0,744133333 | 0,140754256 |    |
| 931 | QHLKSVMLQ      | Troponin I                                               | 0,750316667 | 0,180890235 |    |
| 932 | ISQESSEEE      | high mobility group protein                              | 0,59315     | 0,077056808 |    |
| 933 | NGDASPAAA      | myristolated alanine-rich C-kinase substrate (MARCKS)    | 0,627866667 | 0,06328194  |    |
| 934 | EHVSSSEES      | Alpha-S2 casein                                          | 0,59        | 0,077431303 |    |
| 935 | ESMESYEVS      | Matrix Gla-protein                                       | 0,602833333 | 0,061825862 |    |
| 936 | KQLASFEIY      | Cystatin S                                               | 0,618383333 | 0,059064828 |    |
| 937 | NMPSSDDGL      | muscarinic acetylcholine receptor M2                     | 0,6062      | 0,024515335 |    |
| 938 | PYKFPSSPLRIPGZ |                                                          | 0,625583333 | 0,05453967  |    |
| 939 | GSLKSRKRA      | spermatid nuclear transition protein 1                   | 0,797183333 | 0,187751726 |    |
| 940 | AVRRSDRAY      | Troponin I                                               | 0,650816667 | 0,078047575 |    |
| 941 | DPTMSKSKK      | eukaryotic translation initiation factor 2 beta          | 1,925583333 | 0,446038941 | On |
| 942 | GGGTSPVFP      | Desmin                                                   | 0,6806      | 0,07520994  |    |
| 943 | GSTSTPAPS      | ATP-citrate (pro-S-) lyase                               | 0,651516667 | 0,032565455 |    |
| 944 | EGGRTVGAG      | Elongation factor Tu-A and B                             | 0,63335     | 0,04526439  |    |
| 945 | ESHESLESY      | Matrix Gla-protein                                       | 0,64825     | 0,062141089 |    |
| 946 | RVLESFRAA      | voltage-gated potassium channel                          | 0,620116667 | 0,109600885 |    |
| 947 | SMANSFVGT      | mitogen-activated protein kinase kinase 1                | 0,6036      | 0,105684018 |    |
| 948 | RRPSPA         | pyruvate kinase                                          | 0,693833333 | 0,061563914 |    |
| 949 | ADSFSLNDA      | galectin-3                                               | 0,628483333 | 0,095586438 |    |
| 950 | ATSASPPQK      | p53                                                      | 0,593833333 | 0,052835852 |    |
| 951 | DNLYYWDQD      | Receptor tyrosine-protein kinase erbB-2                  | 0,619883333 | 0,070019442 |    |



|      |                |                                                 |             |             |    |
|------|----------------|-------------------------------------------------|-------------|-------------|----|
| 952  | GDSSYKNIH      | macrophage colony stimulating factor 1 receptor | 0,683783333 | 0,08354941  |    |
| 953  | RKRLSQDAY      | Neutrophil cytosol factor 6                     | 0,639766667 | 0,107795658 |    |
| 954  | ASGSFKL        | Histone H1.1                                    | 0,641116667 | 0,065604577 |    |
| 955  | LRRGSLG        | pyruvate kinase                                 | 0,760016667 | 0,17488504  |    |
| 956  | RRSVSEAAL      | hormone sensitive lipase                        | 0,634266667 | 0,053149245 |    |
| 957  | SLAMSPRQR      | Protein phosphatase inhibitor 5                 | 0,641816667 | 0,046355588 |    |
| 958  | RRASLG         |                                                 | 0,83895     | 0,164277727 |    |
| 959  | AAVDTSEI       | Prothymosin                                     | 0,6982      | 0,070248286 |    |
| 960  | TESQSLTLT      | Beta casein                                     | 0,668466667 | 0,093528662 |    |
| 961  | TTRVTPLRT      | Desmin                                          | 0,60465     | 0,034152233 |    |
| 962  | WTADSGEGD      | Fibrinogen alpha                                | 0,6225      | 0,039332959 |    |
| 963  | RHRDTGILD      | Myelin basic protein                            | 0,6692      | 0,044181953 |    |
| 964  | NRIYTHQVV      | cell division protein kinase 7                  | 0,821566667 | 0,075505467 | On |
| 965  | LRKASLG        | pyruvate kinase                                 | 0,60625     | 0,040566632 |    |
| 966  | YHGHSMSDP      | pyruvate dehydrogenase E1                       | 0,689533333 | 0,023218037 | On |
| 967  | SSEESIISQ      | Alpha-S2 casein                                 | 0,70425     | 0,125603689 |    |
| 968  | PKRGSKDG       | Myelin basic protein                            | 0,597433333 | 0,077611536 |    |
| 969  | LGSALRRR       | vimentin                                        | 0,596966667 | 0,121332411 |    |
| 970  | TDESDNEI       | lower matrix phosphoprotein                     | 0,668983333 | 0,096710232 |    |
| 971  | TRSVSSSSY      | vimentin                                        | 0,693616667 | 0,079265339 |    |
| 972  | PPRRSSIRN      | Neutrophil cytosol factor 7                     | 0,64085     | 0,045635202 |    |
| 973  | RTKGSQSV       | phosphorylase b kinase beta                     | 0,630833333 | 0,076193573 |    |
| 974  | KRAASPRKS      | Histone H5                                      | 1,932233333 | 0,081233515 | On |
| 975  | LMAPSEEDH      | insulin-like growth factor binding protein 2    | 0,615816667 | 0,059410063 |    |
| 976  | QNPVYHNQP      | EGF Receptor                                    | 0,63085     | 0,095842918 |    |
| 977  | SRSRSRSPG      | Lamin B receptor                                | 0,61185     | 0,049184872 |    |
| 978  | KRKVSSAEG      | Nonhistone chromosomal protein HMG-14           | 0,618       | 0,058525052 |    |
| 979  | LQDDYEDMM      | Band 3 anion transport protein                  | 0,657066667 | 0,052827586 |    |
| 980  | QRRSSEGST      | Volt.-dep. L-type calcium channel alpha-1S      | 0,65185     | 0,026106417 |    |
| 981  | GVLRRASVA      | pyruvate kinase                                 | 0,8689      | 0,292690983 |    |
| 982  | KRPSLRAKA      | Myelin basic protein                            | 2,820283333 | 0,819184528 | On |
| 983  | EASTTVSKT      | Rhodopsin                                       | 0,67895     | 0,144178552 |    |
| 984  | ELSNYIAMG      | Insulin receptor substrate 9                    | 0,6024      | 0,036884211 |    |
| 985  | HHHATPSPP      | Myb proto-oncogene protein                      | 0,625483333 | 0,084031843 |    |
| 986  | KTETSQVAP      | Rhodopsin                                       | 0,557533333 | 0,08079398  |    |
| 987  | PYKFPSSPLRIPGZ |                                                 | 0,528883333 | 0,047109135 |    |
| 988  | GGSVTKKRK      | Lamin C                                         | 4,36055     | 0,575428584 | On |
| 989  | AKRISGKMA      | cell division control protein 2                 | 2,385333333 | 0,458296829 | On |
| 990  | DDPSYVNVQ      | Adaptor molecule SHC                            | 0,5699      | 0,084918579 |    |
| 991  | EVEKSPVKS      | neurofilament triplet M                         | 0,500033333 | 0,057986569 |    |
| 992  | GKSSYSKQ       | Fibrinogen alpha                                | 0,868016667 | 0,048306596 | On |
| 993  | DSRSSLIRK      | multidrug resistance protein 3                  | 0,861383333 | 0,155852475 |    |
| 994  | EKAKSPVPK      | neurofilament triplet M                         | 0,5506      | 0,031745577 |    |
| 995  | RQRKSRTTI      | Interleukin-2 receptor alpha                    | 0,803466667 | 0,080446466 |    |
| 996  | SAYATVKAY      | Annexin II                                      | 0,621866667 | 0,124190434 |    |
| 997  | NTDGSTDYG      | Lysozyme C                                      | 0,602633333 | 0,1315044   |    |
| 998  | KRTLRL         | EGF Receptor                                    | 0,625333333 | 0,100270188 |    |
| 999  | AGPTSARDG      | RNA polymerase alpha                            | 0,547516667 | 0,087944086 |    |
| 1000 | DAPDPELL       | Tyrosine-protein kinase Dash/Abl                | 0,576116667 | 0,082370326 |    |
| 1001 | ESSYSYEEI      | RNA polymerase alpha                            | 0,67055     | 0,054338584 |    |
| 1002 | YSLGSALRP      | vimentin                                        | 0,56115     | 0,08379455  |    |
| 1003 | SPHQSEDEE      | Glycogen [starch] synthase                      | 0,544833333 | 0,092736404 |    |
| 1004 | RKRRAE         | Histone H2B                                     | 0,666866667 | 0,129091985 |    |
| 1005 | RNASTNDSP      | Beta-2 adrenergic receptor                      | 0,533516667 | 0,0815543   |    |
| 1006 | SAELYSNAL      | platelet-derived growth factor receptor         | 0,587883333 | 0,057805945 |    |
| 1007 | NRQLSSGVS      | Heat Shock Protein 28                           | 0,56055     | 0,031718318 |    |



|      |                |                                                           |             |             |    |
|------|----------------|-----------------------------------------------------------|-------------|-------------|----|
| 1008 | VGPDS          | p53                                                       | 0,62385     | 0,029173361 |    |
| 1009 | SSSESGAPE      | Clathrin light chain B                                    | 0,521633333 | 0,047486916 |    |
| 1010 | TKHIYSNLA      | Mast/stem cell growth factor receptor                     | 0,520033333 | 0,046853181 |    |
| 1011 | VDEMYREAP      | Myosin regulatory light chain 4                           | 0,52285     | 0,110968224 |    |
| 1012 | YRKGLSKSR      | spermatid nuclear transition protein 1                    | 1,185533333 | 0,175035912 | On |
| 1013 | SNQEYLDLS      | Receptor tyrosine kinase                                  | 0,629233333 | 0,058340614 |    |
| 1014 | RKISASE        | cGMP-specific phosphodiesterase 3a                        | 0,603916667 | 0,076377902 |    |
| 1015 | VGFMTHEYVA     | mitogen-activated protein kinase 1                        | 0,626416667 | 0,044854902 |    |
| 1016 | QTASSPLSP      | Lamin                                                     | 0,51805     | 0,028104656 |    |
| 1017 | LRKVKQEE       | vasodilator-stimulated phosphoprotein                     | 0,512716667 | 0,061811411 |    |
| 1018 | PQRATSNVF      | Myosin regulatory light chain 6                           | 0,5142      | 0,087776221 |    |
| 1019 | SSNDSTSVS      | muscarinic acetylcholine receptor M2                      | 0,565       | 0,088933468 |    |
| 1020 | THVASVSDV      | acetyl-CoA carboxylase                                    | 0,584783333 | 0,074855509 |    |
| 1021 | LRLSTKYR       | protein-tyrosine phosphatase G1                           | 0,624833333 | 0,055796958 |    |
| 1022 | PRRDSTEGF      | fructose-1,6-bisphosphatase                               | 0,870166667 | 0,15454595  |    |
| 1023 | KAEEYILKK      | Acetylcholine receptor protein gamma                      | 0,68655     | 0,20223577  |    |
| 1024 | KRPSFRAKA      | Myelin basic protein                                      | 0,530683333 | 0,052693964 |    |
| 1025 | PTPSAPSPQPKG   | Tyrosine 3-monooxygenase                                  | 0,560933333 | 0,066038844 |    |
| 1026 | QRYSSDPTG      | EGF Receptor                                              | 0,523666667 | 0,014850159 |    |
| 1027 | KEDTYTAHA      | Tyrosine-protein kinase abl-1                             | 0,575416667 | 0,059086509 |    |
| 1028 | KRRLSFSET      | Interleukin-1 alpha                                       | 0,82875     | 0,11836436  |    |
| 1029 | KRAKAKTTKRR    | Myosin regulatory light chain 2                           | 5,194616667 | 0,501963387 | On |
| 1030 | HRQETVDAL      | calcium/calmodulin-dependent protein kinase type II alpha | 0,537733333 | 0,029767581 |    |
| 1031 | LNRMSFASN      | acetyl-CoA carboxylase                                    | 0,5684      | 0,056624921 |    |
| 1032 | EEDTYTMPS      | Focal adhesion kinase                                     | 0,573716667 | 0,04173113  |    |
| 1033 | EQEYEDPD       | Band 3 anion transport protein                            | 0,552483333 | 0,043799778 |    |
| 1034 | HVSSSEESI      | Alpha-S2 casein                                           | 0,649833333 | 0,102084771 |    |
| 1035 | METPSQRRRA     | Lamin C                                                   | 0,601433333 | 0,051640719 |    |
| 1036 | PYKFPSSPLRIPGZ |                                                           | 0,6097      | 0,033000909 |    |
| 1037 | GNFNYVEFT      | Myosin regulatory light chain 2                           | 0,5628      | 0,07663114  |    |
| 1038 | APRTPGGRR      | Myelin basic protein                                      | 0,596966667 | 0,054441319 |    |
| 1039 | DGNGYISAA      | Calmodulin                                                | 0,6352      | 0,032035631 |    |
| 1040 | FLTEYVATR      | extracellular signal-regulated kinase 2                   | 0,548966667 | 0,125519602 |    |
| 1041 | GRALSTRAQ      | Troponin I                                                | 0,577266667 | 0,043708358 |    |
| 1042 | EDRMSLVNS      | Cystatin S                                                | 0,594866667 | 0,070287011 |    |
| 1043 | ENPEYLGLD      | Receptor tyrosine-protein kinase erbB-2                   | 0,643733333 | 0,093556884 |    |
| 1044 | RRLSSLRAS      | 40S ribosomal protein S6                                  | 0,613366667 | 0,118869469 |    |
| 1045 | SFKKSFKLS      | myristolated alanine-rich C-kinase substrate (MARCKS)     | 1,428866667 | 0,080192948 | On |
| 1046 | PSKKYAIKG      | Glutamyl aminopeptidase                                   | 0,670533333 | 0,099136105 |    |
| 1047 | RRPSV          | pyruvate kinase                                           | 0,7357      | 0,220282141 |    |
| 1048 | APETPGGRR      | Myelin basic protein                                      | 0,585233333 | 0,142298725 |    |
| 1049 | DEEMSETAD      | Protein phosphatase inhibitor 2                           | 0,5831      | 0,090148914 |    |
| 1050 | FFSSSESGA      | Clathrin light chain B                                    | 0,6416      | 0,06231863  |    |
| 1051 | RDDTYTAHA      | Tyrosine-protein kinase Dash/Abl                          | 0,589983333 | 0,045610677 |    |
| 1052 | APTPGGRR       | Myelin basic protein                                      | 0,602833333 | 0,106730426 |    |
| 1053 | STNDSPL        | Beta-2 adrenergic receptor                                | 0,684766667 | 0,092092294 |    |
| 1054 | RRKASGPPV      | Histone H1.1                                              | 0,602183333 | 0,029166543 |    |
| 1055 | SEENSKKTV      | Alpha-S2 casein                                           | 0,679416667 | 0,064096715 |    |
| 1056 | PASPSPQRQ      | synapsins IA and IB                                       | 0,58475     | 0,043205459 |    |
| 1057 | RRASR          | pyruvate kinase                                           | 0,6033      | 0,115070985 |    |
| 1058 | STNEYMDMK      | Mast/stem cell growth factor receptor                     | 0,631766667 | 0,09084765  |    |
| 1059 | TPPLSPIDM      | Transcription factor AP-5                                 | 0,609416667 | 0,087438563 |    |
| 1060 | VKGATSDEE      | DNA topoisomerase II                                      | 0,60105     | 0,06144682  |    |
| 1061 | QRATSNVFA      | Myosin regulatory light chain 5                           | 0,66325     | 0,067381056 |    |
| 1062 | SPRKSPRKS      | Histone H6                                                | 2,465483333 | 0,487972117 | On |
| 1063 | RRRASVA        | pyruvate kinase                                           | 0,686566667 | 0,068306373 |    |

|      |                |                                                         |             |             |    |
|------|----------------|---------------------------------------------------------|-------------|-------------|----|
| 1064 | VTPSPGLP       | casein kinase II                                        | 0,58735     | 0,054211023 |    |
| 1065 | SRKDSLDDDS     | alpha-1B adrenergic receptor                            | 0,62675     | 0,050843993 |    |
| 1066 | LSEHSSPEE      | Dopamine- and cAMP-regulated neuronal phosphoprotein    | 0,612566667 | 0,045846707 |    |
| 1067 | PSPKYPGPQ      | Chromogranin A                                          | 0,596483333 | 0,066510655 |    |
| 1068 | SSVLYTAVQ      | platelet-derived growth factor receptor                 | 0,605983333 | 0,053177225 |    |
| 1069 | TLSDSDDDED     | N-myc proto-oncogene protein                            | 0,786716667 | 0,131213448 |    |
| 1070 | LSLDSQGRN      | Beta-2 adrenergic receptor                              | 0,614566667 | 0,053371596 |    |
| 1071 | PTKRSPQKG      | Histone H2B.1                                           | 0,596283333 | 0,093226644 |    |
| 1072 | KIQASFRGH      | neurogranin                                             | 1,31565     | 0,11914124  | On |
| 1073 | KRSNSVDTS      | Glycogen [starch] synthase                              | 0,618383333 | 0,028343792 |    |
| 1074 | KRKQISGRGL     | Glycogen phosphorylase                                  | 0,561333333 | 0,081806778 |    |
| 1075 | SQESSEEEQ      | high mobility group protein                             | 0,583633333 | 0,068955062 |    |
| 1076 | KKDVTPVKA      | Histone H1                                              | 0,7222      | 0,038918183 |    |
| 1077 | KSRWSGSQQ      | RAF proto-oncogene ser/thr-protein kinase               | 0,588833333 | 0,048890973 |    |
| 1078 | LYSGSEGDS      | Serum response factor                                   | 0,70535     | 0,043448955 |    |
| 1079 | IGHHSTSD       | 2-oxoisovalerate dehydrogenase alpha                    | 0,6043      | 0,101288063 |    |
| 1080 | MPGETPPLS      | Transcription factor AP-3                               | 0,608533333 | 0,03921684  |    |
| 1081 | EETVYEAEP      | Hematopoietic cell-specific LYN substrate               | 0,680833333 | 0,132514869 |    |
| 1082 | ERRNSILTE      | cystic fibrosis transmembrane conductance regulator     | 0,79435     | 0,150176935 |    |
| 1083 | INETSQHHD      | vimentin                                                | 0,635466667 | 0,089114405 |    |
| 1084 | NDSNYVVKG      | Mast/stem cell growth factor receptor                   | 0,61825     | 0,068978294 |    |
| 1085 | PYKFPSSPLRIPGZ |                                                         | 0,635916667 | 0,022401128 |    |
| 1086 | GRNASTNDS      | Beta-2 adrenergic receptor                              | 0,6376      | 0,083134149 |    |
| 1087 | ARSGSSTYS      | parathyroid hormone/parathyroid hormone-related peptide | 0,651283333 | 0,05148141  |    |
| 1088 | DLTSPDVG       | Transcription factor AP-4                               | 0,63945     | 0,123760515 |    |
| 1089 | GAGNSLRTA      | Lamin C                                                 | 0,66825     | 0,072623079 |    |
| 1090 | GRTWTLAGT      | cGMP-dependent protein kinase (PKG)                     | 0,6159      | 0,059257573 |    |
| 1091 | EEHVYSFPN      | Paxillin                                                | 0,5967      | 0,081171434 |    |
| 1092 | ERHHSIDAQ      | phosphoenolpyruvate carboxylase                         | 0,595633333 | 0,041019311 |    |
| 1093 | RRRRAASVA      | pyruvate kinase                                         | 0,661766667 | 0,099285987 |    |
| 1094 | SIRDTPAKN      | Nucleophosmin                                           | 0,605683333 | 0,094589819 |    |
| 1095 | GGYSLG         | Lysozyme C                                              | 0,754966667 | 0,118951351 |    |
| 1096 | AAASFKAKK      |                                                         | 1,459066667 | 0,325906112 | On |
| 1097 | ARDIYKNDY      | Ros proto-oncogene tyrosine kinase                      | 0,64345     | 0,076079903 |    |
| 1098 | DKEVSDDEA      | HSP90-alpha                                             | 0,657466667 | 0,073558733 |    |
| 1099 | FRKFTKSER      | cGMP-dependent protein kinase (PKG)                     | 1,144866667 | 0,311832247 |    |
| 1100 | RFFGSDRGA      | Myelin basic protein                                    | 0,650716667 | 0,015916518 |    |
| 1101 | PRTPGGRR       | Myelin basic protein                                    | 0,689166667 | 0,087876593 |    |
| 1102 | KRRVSEV        | Erythrodihydroneopterin triphosphate synthetase         | 3,076216667 | 0,563934048 | On |
| 1103 | RRRGSSIPQ      | 6-phosphofructo-2-kinase/fructose-2,6-bisphosphatase    | 0,848916667 | 0,187092234 |    |
| 1104 | SGDTPRHL       | Microtubule-associated protein tau                      | 0,66765     | 0,079323683 |    |
| 1105 | KQITVR         | Glycogen phosphorylase                                  | 1,274283333 | 0,164378756 | On |
| 1106 | SSKRA          | Myosin regulatory light chain 2                         | 0,708766667 | 0,034285598 |    |
| 1107 | SVSSSYRR       | vimentin                                                | 0,865083333 | 0,132761329 |    |
| 1108 | TRQASISGP      | synapsins                                               | 0,645233333 | 0,046621192 |    |
| 1109 | VRTYTHEVV      | Cell division protein kinase 2                          | 0,784333333 | 0,157739714 |    |
| 1110 | REILSRRPS      | cAMP response element binding protein                   | 0,787383333 | 0,155695656 |    |
| 1111 | GASGSFKL       | Histone H1.1                                            | 0,689333333 | 0,082001833 |    |
| 1112 | VRRSDRA        | Troponin I                                              | 0,696516667 | 0,025525064 | On |
| 1113 | VTRRTLSDM      | 6-phosphofructokinase                                   | 0,645566667 | 0,08499816  |    |
| 1114 | SRRGESSE       | phosphoprotein phosphatase 1, 3a                        | 0,798583333 | 0,107940619 |    |
| 1115 | PASAYGSVK      | Annexin II                                              | 0,733916667 | 0,164618773 |    |
| 1116 | PWQVSLRTR      | Plasminogen                                             | 0,619333333 | 0,11512209  |    |
| 1117 | STSRSLYSS      | vimentin                                                | 0,777966667 | 0,155693611 |    |
| 1118 | TRGGSLERS      | alpha-1B adrenergic receptor                            | 0,624733333 | 0,056471561 |    |
| 1119 | PFKLSGLSF      | MARCKS-related protein                                  | 0,659683333 | 0,085842786 |    |

|      |                |                                                       |             |             |    |
|------|----------------|-------------------------------------------------------|-------------|-------------|----|
| 1120 | QEQEYVQAV      | Annexin I                                             | 0,6393      | 0,058364772 |    |
| 1121 | KKRFSFKKS      | myristolated alanine-rich C-kinase substrate (MARCKS) | 2,248216667 | 0,091859942 | On |
| 1122 | KYLASASTM      | Myelin basic protein                                  | 0,793566667 | 0,106623437 |    |
| 1123 | PRRVSRRRR      | Protamine YII                                         | 0,6987      | 0,098841009 |    |
| 1124 | SRKRSGEAT      | 6-phosphofructokinase                                 | 0,64955     | 0,085645519 |    |
| 1125 | KMKDSDSEE      | Calmodulin                                            | 0,629833333 | 0,087490517 |    |
| 1126 | LFRLSEHSS      | Dopamine- and cAMP-regulated neuronal phosphoprotein  | 0,657433333 | 0,059770678 |    |
| 1127 | QDENTVSTS      | muscarinic acetylcholine receptor M2                  | 0,64155     | 0,09304953  |    |
| 1128 | ISITSRKAQ      | GTP-binding protein era                               | 0,678333333 | 0,105553978 |    |
| 1129 | NFLKTSAGS      | Carbon catabolite derepressing protein kinase         | 0,616616667 | 0,029414745 |    |
| 1130 | EHIPYTHMN      | Insulin Receptor (IR)                                 | 0,6281      | 0,096568223 |    |
| 1131 | ESMESYELN      | Matrix Gla-protein                                    | 0,7581      | 0,03373843  | On |
| 1132 | KKRFSFKKS      | myristolated alanine-rich C-kinase substrate (MARCKS) | 3,949366667 | 0,148653901 | On |
| 1133 | NKQGYKARQ      | Protein kinase C delta                                | 0,779383333 | 0,03645546  | On |
| 1134 | PYKFPSSPLRIPGZ |                                                       | 0,59565     | 0,052461049 |    |
| 1135 | GSSTSSRPS      | vimentin                                              | 0,558816667 | 0,04009585  |    |
| 1136 | AVMVSHYIH      | Prolactin                                             | 0,6473      | 0,065751705 |    |
| 1137 | DPPGTESFV      | Beta-2 adrenergic receptor                            | 0,592033333 | 0,073178666 |    |
| 1138 | GFKRSYEEH      | Insulin Receptor (IR)                                 | 0,615683333 | 0,125354599 |    |
| 1139 | GSRRRRRRY      | protamine                                             | 0,72555     | 0,041759689 |    |
| 1140 | EFPLSPPKK      | stathmin                                              | 0,653233333 | 0,056035782 |    |
| 1141 | ESEKTKTKE      | myosin II heavy chain                                 | 0,620933333 | 0,08504019  |    |
| 1142 | RSSMSGLHL      | acetyl-CoA carboxylase                                | 0,593916667 | 0,02099406  |    |
| 1143 | SLVNSRAQE      | Cystatin S                                            | 0,64005     | 0,090325772 |    |
| 1144 | RRATVA         | pyruvate kinase                                       | 0,623733333 | 0,009295997 |    |
| 1145 | ADSFSLHDA      | galectin-3                                            | 0,619316667 | 0,051941736 |    |
| 1146 | ATRRSYVSS      | glial fibrillary acidic protein                       | 0,62425     | 0,042974198 |    |
| 1147 | DNIDSQGRN      | Beta-2 adrenergic receptor                            | 0,610216667 | 0,051172459 |    |
| 1148 | GDSSEGEIE      | Serum response factor                                 | 0,632733333 | 0,039572556 |    |
| 1149 | RKRKSSQAL      | Thyroid hormone receptor alpha                        | 0,651983333 | 0,058819559 |    |
| 1150 | AKRSRKE        | Histone H2B                                           | 0,6123      | 0,039611383 |    |
| 1151 | LRRATLG        | pyruvate kinase                                       | 0,741816667 | 0,074379683 |    |
| 1152 | RRSSSVGYI      | Acetylcholine receptor protein delta                  | 0,7977      | 0,125168926 |    |
| 1153 | SKVTSKAGS      |                                                       | 0,628333333 | 0,069542054 |    |
| 1154 | RGYSLG         | Lysozyme C                                            | 0,62475     | 0,065507709 |    |
| 1155 | AARTPGGRR      | Myelin basic protein                                  | 0,620733333 | 0,108932413 |    |
| 1156 | TEPQYQPGE      | Proto-oncogene tyrosine-protein kinase Fyn            | 0,67265     | 0,05725663  |    |
| 1157 | TTRRSASKT      | Fibrinogen alpha                                      | 0,623416667 | 0,047464133 |    |
| 1158 | WLTKTPEGN      | Actin and myosin binding protein                      | 0,604083333 | 0,05462442  |    |
| 1159 | RGRSSVYSA      | myosin heavy chain                                    | 0,587866667 | 0,042021152 |    |
| 1160 | RKRTLRRRL      | EGF Receptor                                          | 0,623233333 | 0,038569209 |    |
| 1161 | LRHASLG        | pyruvate kinase                                       | 0,625233333 | 0,031267697 |    |
| 1162 | YNGYSSNS       | Beta-2 adrenergic receptor                            | 0,631933333 | 0,080470743 |    |
| 1163 | SRTPSLPTP      | Microtubule-associated protein tau                    | 0,682166667 | 0,055335497 |    |
| 1164 | PKKGSKKAV      | Histone H2B                                           | 1,23225     | 0,134990673 | On |
| 1165 | LELSDDDD       | Myosin heavy chain, nonmuscle type B                  | 0,725166667 | 0,091654736 |    |
| 1166 | TDDGYMPMS      | Insulin receptor substrate 10                         | 0,609583333 | 0,059341067 |    |
| 1167 | TRRLTGFLP      | Glycogen phosphorylase                                | 0,651233333 | 0,04134784  |    |
| 1168 | PPEKTEEEE      | somatostatin receptor type 5                          | 0,581383333 | 0,080636162 |    |
| 1169 | RTGRSGSV       | phosphorylase b kinase beta                           | 0,751866667 | 0,22071945  |    |
| 1170 | KQSPSSSPT      | phosphorylcholine transferase                         | 0,598816667 | 0,052787393 |    |
| 1171 | LLRPSRRVR      | somatostatin receptor type 6                          | 0,60085     | 0,049730423 |    |
| 1172 | QMALTPVVV      | cell division protein kinase 4                        | 0,659583333 | 0,081900685 |    |
| 1173 | SRSRSPGRP      | Lamin B receptor                                      | 0,70865     | 0,120880464 |    |
| 1174 | KRKRSRKES      | Histone H2B                                           | 3,057633333 | 0,590306619 | On |
| 1175 | LQAISPKQS      | phosphorylcholine transferase                         | 0,695316667 | 0,129169155 |    |

1176

QRRRSLEPP

Proto-oncogene tyrosine-protein kinase Src

0,692766667

0,161322278

**Suppl. Table 7. Average densitometry values for all substrates on the arrays for mature NK cells and their Markov test of significance**

| Peptide # | Sequence       | Source protein                                          | $\sum(x_1, x_2, \dots, x_9)/n$ | $\sigma(x_1, x_2, \dots, x_9)$ | Markov state |
|-----------|----------------|---------------------------------------------------------|--------------------------------|--------------------------------|--------------|
| 1         | HEYIYVDP       | platelet-derived growth factor receptor                 | 1,203484605                    | 0,537081992                    |              |
| 2         | KRPSVRAKA      | Myelin basic protein                                    | 1,525345562                    | 0,441684383                    |              |
| 3         | EDNEYTARQ      | Tyrosine-protein kinase transforming protein SRC        | 1,508019505                    | 0,194661156                    | On           |
| 4         | ENKLYGMSD      | Probable receptor with tyrosine-protein kinase activity | 1,690230892                    | 0,574810813                    |              |
| 5         | HRLLTLDPV      | Interleukin-1 receptor                                  | 0,857324485                    | 0,278918098                    |              |
| 6         | LEKKYVRRD      | macrophage colony stimulating factor 1 receptor         | 0,663722227                    | 0,160823365                    |              |
| 7         | PYKFPSSPLRIPGZ |                                                         | 1,582299697                    | 0,383177491                    |              |
| 8         | GKRQTEREK      | Troponin T                                              | 1,964336626                    | 0,693811206                    |              |
| 9         | APATSPKAE      | neuromodulin (GAP43)                                    | 0,913004711                    | 0,206825009                    |              |
| 10        | DEESEQGA       | tubulin                                                 | 1,796290191                    | 0,070189234                    | On           |
| 11        | FFRRSKIAV      | glutamate receptor 2                                    | 0,785370832                    | 0,130738251                    |              |
| 12        | GMTEYVATR      | Mitogen-activated protein kinase FUS3                   | 1,321990918                    | 0,291841245                    |              |
| 13        | EAALYKNLL      | Mast/stem cell growth factor receptor                   | 2,688055361                    | 0,509310288                    | On           |
| 14        | ELILSPRSK      | stathmin                                                | 0,657574076                    | 0,205179791                    |              |
| 15        | RRAVSEQDA      | Tyrosine 3-monooxygenase                                | 0,969663323                    | 0,176685031                    |              |
| 16        | SEDNSEDEI      | acetyl-CoA carboxylase                                  | 0,7561298                      | 0,073315427                    |              |
| 17        | PASLSRAKA      | phosphorylcholine transferase                           | 1,26344452                     | 0,36147168                     |              |
| 18        | RRASL          | pyruvate kinase                                         | 1,890906436                    | 0,257286832                    | On           |
| 19        | AKKMSTYNV      | myosin heavy chain                                      | 0,679297321                    | 0,047577378                    |              |
| 20        | DDINSYEA       | Coagulation factor IX                                   | 1,94944191                     | 0,856199256                    |              |
| 21        | ETRFTDTRK      | elongation factor 2                                     | 0,578692841                    | 0,038134319                    |              |
| 22        | QLSTSEENS      | Alpha-S2 casein                                         | 0,69313606                     | 0,055370717                    |              |
| 23        | SPRKSPKKS      | Histone H1                                              | 0,950634516                    | 0,195394873                    |              |
| 24        | RRKASGP        | Histone H1.1                                            | 1,029313486                    | 0,366915621                    |              |
| 25        | RQLRSPRRT      | ras-related protein Rab-4A                              | 1,923831124                    | 0,464311858                    |              |
| 26        | SAVASNMRD      | muscarinic acetylcholine receptor M2                    | 1,025856843                    | 0,198679979                    |              |
| 27        | RTPPPSG        | Myelin basic protein                                    | 0,879768779                    | 0,110892344                    |              |
| 28        | LRRAS          | Red cell/liver pyruvate kinase                          | 1,666593395                    | 0,453191516                    |              |
| 29        | SSTGSIDMV      | Microtubule-associated protein tau                      | 1,068069436                    | 0,11444688                     |              |
| 30        | TLASSFKRR      | glutamate (NMDA) receptor subunit zeta 1                | 1,485101851                    | 0,271441062                    |              |
| 31        | VGAFSTVKG      | rhodopsin kinase                                        | 0,650023656                    | 0,116411692                    |              |
| 32        | YSGHMSMDP      | pyruvate dehydrogenase E1                               | 1,124399698                    | 0,424128424                    |              |
| 33        | SPGEYVNI       | Insulin receptor substrate 1                            | 0,640287431                    | 0,228946183                    |              |
| 34        | RKRSAKE        | Histone H2B                                             | 0,841379617                    | 0,026036309                    |              |
| 35        | VINETSQHH      | vimentin                                                | 0,584330981                    | 0,123143747                    |              |
| 36        | SPVVSGDTS      | Microtubule-associated protein tau                      | 0,56754607                     | 0,081819242                    |              |
| 37        | LRRFSLATM      | Cytochrome P450 2B1                                     | 2,139592693                    | 0,256690295                    | On           |
| 38        | PRPASVPPS      | Glycogen [starch] synthase                              | 0,586950215                    | 0,237548598                    |              |
| 39        | SSRPSSNRS      | vimentin                                                | 3,240170165                    | 0,129415411                    | On           |
| 40        | TKFASDDEH      | Lupus La protein                                        | 0,639533102                    | 0,048791897                    |              |
| 41        | LSDDSFIED      | DNA topoisomerase II                                    | 0,704567572                    | 0,215421526                    |              |
| 42        | PSPKTPPGS      | Microtubule-associated protein tau                      | 1,588352763                    | 0,22376147                     | On           |
| 43        | KDIGSESTE      | Alpha-S1 casein                                         | 1,805576825                    | 0,24400842                     | On           |
| 44        | KRRGSVPIL      | erythrocyte protein 4.2                                 | 1,052492759                    | 0,234629374                    |              |
| 45        | KRAKAKAKKR     | Myosin regulatory light chain 2                         | 2,12841411                     | 1,300946984                    |              |
| 46        | QSYSSQRV       | Desmin                                                  | 1,131138578                    | 0,544613756                    |              |
| 47        | KGTGYIKTE      | Signal Transducer and Activator of Transcription 1      | 0,877781266                    | 0,07642801                     |              |
| 48        | KRSLSEMEI      | Serum response factor                                   | 0,681563993                    | 0,275935426                    |              |
| 49        | KRKQGSVRGL     | Glycogen phosphorylase                                  | 1,540585767                    | 0,367790827                    |              |
| 50        | HTRDSEAQR      | erythrocyte band 7                                      | 0,742857202                    | 0,069881167                    |              |
| 51        | MAEVSWKVL      | Phosphorylase b kinase beta                             | 0,704457541                    | 0,094639268                    |              |
| 52        | EEGISQESS      | high mobility group protein                             | 0,660236154                    | 0,07727904                     |              |
| 53        | EQQQTEDEL      | Beta casein                                             | 0,745154109                    | 0,088073728                    |              |
| 54        | IGEGTYGVV      | Cell division protein kinase 2                          | 2,548028019                    | 0,608700192                    | On           |
| 55        | MMPYVVTR       | Stress-activated protein kinase JNK1                    | 0,951281593                    | 0,222242334                    |              |



|     |                |                                                         |             |             |    |
|-----|----------------|---------------------------------------------------------|-------------|-------------|----|
| 56  | PYKFPSSPLRIPGZ |                                                         | 2,853837238 | 0,152041573 | On |
| 57  | GQEVYVKKK      | PTK receptor for angiotensin 1 (TEK)                    | 1,390078173 | 0,365386271 |    |
| 58  | AQETSGEEI      | insulin-like growth factor binding protein 1            | 0,994479149 | 0,232710938 |    |
| 59  | DKAKSRPSL      | fructose-1,6-bisphosphatase                             | 0,835446252 | 0,120668173 |    |
| 60  | FPVSYSSSG      | Probable receptor with tyrosine-protein kinase activity | 0,473714134 | 0,10778007  |    |
| 61  | GRLSSMAMI      | myosin light chain kinase                               | 0,737062424 | 0,066564135 |    |
| 62  | EEDLSDENI      | transcription factor BAF1                               | 0,840021183 | 0,053789483 |    |
| 63  | EPGPYAQPS      | Proto-oncogene C-crk                                    | 0,492578865 | 0,014883127 |    |
| 64  | RRRASQLKV      | Gamma-aminobutyric-acid receptor beta                   | 0,836373009 | 0,256648364 |    |
| 65  | SGADYPDEL      | Trypsin I                                               | 2,12656841  | 0,257116555 | On |
| 66  | KQISVR         | Glycogen phosphorylase                                  | 1,918850077 | 0,229961523 | On |
| 67  | SLKDH          | L-lactate dehydrogenase M                               | 2,695189855 | 0,313844312 | On |
| 68  | APRTAGGRR      | Myelin basic protein                                    | 1,142393145 | 0,120367118 |    |
| 69  | DGHEYIYVD      | platelet-derived growth factor receptor                 | 0,666841058 | 0,070097377 |    |
| 70  | FKRSYEEHI      | Insulin Receptor (IR)                                   | 0,785086961 | 0,307459495 |    |
| 71  | REARSRAS       | cAMP-dependent protein kinase II (PKA)                  | 1,711748568 | 0,102520267 | On |
| 72  | DRVYVHPF       | Angiotensinogen                                         | 1,160511588 | 0,210894518 |    |
| 73  | VRRSDAA        | Troponin I                                              | 1,081228929 | 0,261607869 |    |
| 74  | RRKMSRGLP      | Volt.-dep. L-type calcium channel alpha-1S              | 2,749720643 | 1,274892992 |    |
| 75  | SEVPYREVQ      | Tyrosine-protein kinase Src64B (hom MAP3K10)            | 2,098827449 | 0,09514328  | On |
| 76  | PRRASATSS      | Glycogen [starch] synthase                              | 2,708205693 | 1,193077674 |    |
| 77  | RRLSI          | phosphorylase b kinase alpha                            | 0,73348906  | 0,150442784 |    |
| 78  | STLSLSPFYL     | Alpha crystallin B                                      | 1,573393205 | 0,235458263 | On |
| 79  | TRDIYETDY      | Insulin Receptor (IR)                                   | 2,648908166 | 1,214723999 |    |
| 80  | VPTLSTFRT      | Desmin                                                  | 1,813083698 | 0,170871197 | On |
| 81  | RASTSKSES      | 40S ribosomal protein S6                                | 1,91732334  | 0,231946608 | On |
| 82  | SPSSSPTHE      | phosphorylcholine transferase                           | 3,125679663 | 1,304738281 |    |
| 83  | STNDSL         | Beta-2 adrenergic receptor                              | 1,297785324 | 0,097447557 | On |
| 84  | VRTFTHEVV      | Cell division protein kinase 2                          | 2,802286243 | 1,34624588  |    |
| 85  | SRKMSVQEY      | phosducin                                               | 1,16388218  | 0,583118672 |    |
| 86  | LSGLSFKRN      | MARCKS-related protein                                  | 1,229082173 | 0,234821848 |    |
| 87  | PTGTPQRK       | Kinesin-related motor protein Eg5                       | 0,56906002  | 0,140523805 |    |
| 88  | STLASSFKR      | glutamate (NMDA) receptor subunit zeta 2                | 0,975545998 | 0,117178062 |    |
| 89  | TPPKSPSSA      | Microtubule-associated protein tau                      | 0,514325965 | 0,064512818 |    |
| 90  | PAAVSEHGD      | Na+/K+ ATPase 1                                         | 0,949080051 | 0,134213653 |    |
| 91  | PVSPSLVQG      | muscarinic acetylcholine receptor M2                    | 0,656666965 | 0,14332683  |    |
| 92  | KKDASDDLD      | eukaryotic translation initiation factor 2 beta         | 0,634159973 | 0,187866843 |    |
| 93  | KSRPSLPLP      | fructose-1,6-bisphosphatase                             | 0,87086834  | 0,275698504 |    |
| 94  | LSVSSLPGL      | Glycogen [starch] synthase                              | 0,646806142 | 0,220047294 |    |
| 95  | SRHSSPHQS      | Glycogen [starch] synthase                              | 0,786949028 | 0,192866356 |    |
| 96  | KKPPTPPPE      | Large T antigen                                         | 1,616167196 | 0,038005951 | On |
| 97  | KVPQTPLHT      | MAP kinase-activated protein kinase 2                   | 1,431851292 | 0,560345488 |    |
| 98  | PRRSSIRNA      | Neutrophil cytosol factor 1, p47-PHOX                   | 1,138402178 | 0,242056638 |    |
| 99  | ILDTTGQEE      | K-Ras                                                   | 0,903955955 | 0,126712561 |    |
| 100 | NDSNYIVKG      | Macrophage colony stimulating factor I receptor         | 0,895535829 | 0,118703089 |    |
| 101 | EFLRTSAGS      | 5'-AMP-activated protein kinase                         | 0,911825383 | 0,186461155 |    |
| 102 | ERTNSLPPV      | Volt.-dep. L-type calcium channel alpha-1S              | 1,015532246 | 0,303504492 |    |
| 103 | IRRASTIEM      | Cardiac phospholamban                                   | 1,001418153 | 0,155849772 |    |
| 104 | NFDDYMKSL      | Fatty acid-binding protein                              | 0,953304769 | 0,276706552 |    |
| 105 | PYKFPSSPLRIPGZ |                                                         | 0,81093686  | 0,146156336 |    |
| 106 | GRTGRRNSI      |                                                         | 0,879911395 | 0,045585555 |    |
| 107 | ATPIYLDIL      | TrkC tyrosine kinase                                    | 0,893949102 | 0,190626388 |    |
| 108 | DMRQTVAVG      | elongation factor 1-alpha 1                             | 1,92676243  | 0,239634883 | On |
| 109 | GDRFTDEEV      | Myosin regulatory light chain 2                         | 1,33881973  | 0,364534677 |    |
| 110 | GSGSSVTSR      | Desmin                                                  | 0,938247794 | 0,163403017 |    |
| 111 | EEPQYEEIP      | Middle T antigen                                        | 0,930773732 | 0,550546418 |    |

|     |                |                                                         |             |             |    |
|-----|----------------|---------------------------------------------------------|-------------|-------------|----|
| 112 | ERRLSLVPD      | cystic fibrosis transmembrane conductance regulator     | 1,337083874 | 0,205675524 |    |
| 113 | RRSSSRPIR      | Protamine YI                                            | 0,982334672 | 0,044050394 |    |
| 114 | SKIGSTENL      | Microtubule-associated protein tau                      | 0,673468534 | 0,164393636 |    |
| 115 | NDMTSL         | Tropomyosin 1 alpha                                     | 3,006079558 | 0,514718634 | On |
| 116 | AARLSLTDP      | platelet glycoprotein IB                                | 0,959743078 | 0,153236736 |    |
| 117 | ARRSTTDAG      | Choriogonadotropin beta                                 | 0,54982243  | 0,136610842 |    |
| 118 | DLKDTKYKL      | myosin II heavy chain                                   | 1,796104704 | 0,466878196 |    |
| 119 | GAFSTVKGV      | rhodopsin kinase                                        | 1,41691355  | 0,821107652 |    |
| 120 | RGRASSHSS      | Lamin A/C                                               | 0,765556924 | 0,065825226 |    |
| 121 | RKRSRAEF       | Histone H2B                                             | 1,490008812 | 0,169281447 | On |
| 122 | LRAASLG        | Red cell/liver pyruvate kinase                          | 0,920911866 | 0,275191605 |    |
| 123 | RRRQSVLNL      | cystic fibrosis transmembrane conductance regulator     | 6,228341873 | 0,673117486 | On |
| 124 | SIDEYFSEQ      | Interferon receptor                                     | 0,923372184 | 0,461010197 |    |
| 125 | EESESD         | synaptic vesicle amine transporter                      | 1,128451495 | 0,515730412 |    |
| 126 | RRRS           | Troponin I                                              | 1,024613123 | 0,166907338 |    |
| 127 | TAYGTRRHL      | calponin alpha and beta                                 | 0,818058645 | 0,114897256 |    |
| 128 | TRRISQTSQ      | ryanodine receptor                                      | 2,05320324  | 0,289406154 | On |
| 129 | VTPRTPPPS      | Myelin basic protein                                    | 0,810821267 | 0,107613689 |    |
| 130 | REVSSLKSK      | myosin heavy chain                                      | 0,744064643 | 0,046810392 |    |
| 131 | PEETQTQD       | HSP90-alpha                                             | 0,995792341 | 0,082028445 |    |
| 132 | KKQISVR        | Glycogen phosphorylase                                  | 1,048436626 | 0,186395323 |    |
| 133 | WLTKSPDGN      | caldesmon                                               | 0,627576601 | 0,015014376 |    |
| 134 | SRRSSLGSL      | Volt.-dep. L-type calcium channel alpha-1S              | 0,78547245  | 0,147624882 |    |
| 135 | PETVYEVAG      | Cortactin                                               | 0,777641414 | 0,106563894 |    |
| 136 | QEPGSGPPE      | somatostatin receptor type 3                            | 0,877381155 | 0,075646888 |    |
| 137 | SVSSSPIKE      | transcriptional factor SWI5                             | 0,989737777 | 0,213467343 |    |
| 138 | TRLHSLRER      | Sucrose synthase 1                                      | 0,852559279 | 0,184569362 |    |
| 139 | PKEVYDVML      | TrkC tyrosine kinase                                    | 0,623068986 | 0,195185368 |    |
| 140 | PRTPGGRR       | Myelin basic protein                                    | 1,798630918 | 0,390032799 |    |
| 141 | KLSPSPSSR      | Lamin B1                                                | 0,976565727 | 0,114179107 |    |
| 142 | LEKKYVRRD      | macrophage colony stimulating factor 1 receptor         | 0,821756595 | 0,180232155 |    |
| 143 | QASSTPLSP      | Lamin A/C                                               | 0,927747894 | 0,046048251 |    |
| 144 | SRRDSLFP       | Sodium channel protein type II alpha                    | 0,822185445 | 0,172815904 |    |
| 145 | KQPIYVME       | Tyrosine-protein kinase transforming protein Fps        | 1,037303945 | 0,216571355 |    |
| 146 | LLQDSVDFS      | vimentin                                                | 1,645544871 | 0,207635727 | On |
| 147 | QLSTSEENS      | Alpha-S2 casein                                         | 1,507417712 | 0,242865929 |    |
| 148 | KIQASFRGH      | neurogranin                                             | 4,509642227 | 0,803359386 | On |
| 149 | NKGASQAGM      | calponin alpha and beta                                 | 0,790354883 | 0,175184917 |    |
| 150 | EIVESLSSS      | Beta casein                                             | 1,291828447 | 0,195792467 |    |
| 151 | ESSNYMAPY      | platelet-derived growth factor receptor                 | 2,440029576 | 0,646503107 | On |
| 152 | KRPSKRAKA      | Myelin basic protein                                    | 1,359737027 | 0,363430495 |    |
| 153 | NRAITARRQ      | Troponin I                                              | 2,582700326 | 0,168397878 | On |
| 154 | PYKFPSSPLRIPGZ |                                                         | 0,927416676 | 0,342044709 |    |
| 155 | GSRPSESNG      | Lens fiber major intrinsic protein                      | 1,609860269 | 0,431731461 |    |
| 156 | DAHKSKRQH      | transcription factor BAF1                               | 0,685490466 | 0,143629719 |    |
| 157 | DSLIYDDGL      | Probable receptor with tyrosine-protein kinase activity | 1,609899404 | 0,132562887 | On |
| 158 | GGRDSRSGS      | Myelin basic protein                                    | 0,832556844 | 0,364189548 |    |
| 159 | GVERSVRPT      | phosphorylase b kinase alpha                            | 0,809186861 | 0,199600105 |    |
| 160 | EGVKSDQAE      | neurofilament triplet M                                 | 0,77060304  | 0,268601342 |    |
| 161 | ESLSSSEES      | Beta casein                                             | 0,752708575 | 0,096487843 |    |
| 162 | RVRMSADAM      | Troponin I                                              | 0,630604494 | 0,04087479  |    |
| 163 | SNPTYSVMR      | Middle T antigen                                        | 1,135691568 | 0,116924546 |    |
| 164 | SSKRAK         | Myosin regulatory light chain 2                         | 1,817793316 | 0,345764189 | On |
| 165 | AGDGSDEEV      | myosin heavy chain                                      | 1,430072028 | 0,382908922 |    |
| 166 | AVDRYIAIT      | Beta-2 adrenergic receptor                              | 3,475733774 | 0,635526058 | On |
| 167 | DPLLTFRFP      | Lamin A/C                                               | 0,946526279 | 0,14351056  |    |

|     |               |                                                  |             |             |    |
|-----|---------------|--------------------------------------------------|-------------|-------------|----|
| 168 | GENIYIRHS     | erythrocyte protein 4.1                          | 0,724931837 | 0,172716199 |    |
| 169 | RLSPSPTSQ     | Lamin C                                          | 0,802655478 | 0,13140947  |    |
| 170 | RKESYSV       | Histone H2B                                      | 1,379468997 | 0,034567986 | On |
| 171 | PLSRTL        | Glycogen [starch] synthase                       | 0,92124272  | 0,104845751 |    |
| 172 | RSRASTPPA     | cAMP-dependent protein kinase II (PKA)           | 1,147858834 | 0,328712003 |    |
| 173 | SLSSSEESI     | Beta casein                                      | 1,938245504 | 0,267926678 | On |
| 174 | LRRASLAG      | Red cell/liver pyruvate kinase                   | 1,392435156 | 0,166082469 | On |
| 175 | ADSESEDEE     | cAMP-dependent protein kinase II (PKA)           | 2,743582581 | 1,266484078 |    |
| 176 | THERSPSPS     | phosphorylcholine transferase                    | 0,767284594 | 0,091183932 |    |
| 177 | TVTRSRSV      | Lamin A/C                                        | 2,697210192 | 0,162754955 | On |
| 178 | YETDYRKG      | Insulin Receptor (IR)                            | 0,742358085 | 0,136689363 |    |
| 179 | RKQISVRGL     | Glycogen phosphorylase                           | 0,963041688 | 0,167671306 |    |
| 180 | AGTTYAL       | myosin heavy chain IA (fragment)                 | 1,151593265 | 0,2129603   |    |
| 181 | LRRASVA       | pyruvate kinase                                  | 0,907969059 | 0,159250124 |    |
| 182 | YRGYSLGNW     | Lysozyme C                                       | 1,855017193 | 0,532434009 |    |
| 183 | SSLKSRKRA     | spermatid nuclear transition protein 1           | 1,60802953  | 0,176337908 | On |
| 184 | PMRRSVSEA     | hormone sensitive lipase                         | 1,181934407 | 0,220850381 |    |
| 185 | RSKRSGSV      | phosphorylase b kinase beta                      | 3,036903031 | 0,517226634 | On |
| 186 | TEGQYQQQP     | Proto-oncogene tyrosine-protein kinase Lck       | 0,855339376 | 0,100385046 |    |
| 187 | TTPLSPTRL     | Lamin B2                                         | 2,347067188 | 0,867307112 |    |
| 188 | PQPEYVNQP     | Receptor tyrosine-protein kinase erbB-2          | 1,49530524  | 0,471438921 |    |
| 189 | VKRGISGL      | Histone H4                                       | 0,778791716 | 0,106963251 |    |
| 190 | KRKQISVRG     | Glycogen phosphorylase                           | 1,393508844 | 0,16980581  | On |
| 191 | LPVPSTHIG     | cGMP-dependent protein kinase (PKG)              | 2,14273434  | 0,489100256 | On |
| 192 | QRRHSLEPP     | Tyrosine-protein kinase transforming protein SRC | 0,780876553 | 0,084646482 |    |
| 193 | SRTLSVSSL     | Glycogen [starch] synthase                       | 1,030344463 | 0,055038    |    |
| 194 | KRPSEAKA      | Myelin basic protein                             | 0,853795652 | 0,199630746 |    |
| 195 | LRGRSFMNN     | 6-phosphofructokinase                            | 0,813330462 | 0,086500912 |    |
| 196 | QRVSSYRRT     | Desmin                                           | 1,708748923 | 0,160662562 | On |
| 197 | HDLSEMFN      | Prolactin                                        | 1,239015642 | 0,150038086 |    |
| 198 | KRPSRAKA      | Myelin basic protein                             | 0,824441145 | 0,063106868 |    |
| 199 | EDNEYTARP     | Proto-oncogene tyrosine-protein kinase Src       | 1,444958411 | 0,28214527  |    |
| 200 | ENAPSSTSS     | DNA topoisomerase II                             | 1,314964866 | 0,218186595 |    |
| 201 | HMRSSMSGL     | acetyl-CoA carboxylase                           | 1,337838316 | 0,151742739 | On |
| 202 | LDRSSHAQR     | Insulin Receptor (IR)                            | 0,706470688 | 0,043750225 |    |
| 203 | PYKFPSSPLIPGZ |                                                  | 0,85416854  | 0,242120784 |    |
| 204 | GKEIYNTIR     | Ras p21 activator protein                        | 0,903078976 | 0,126498739 |    |
| 205 | APATPGGRR     | Myelin basic protein                             | 1,070793118 | 0,122954494 |    |
| 206 | DEEESEEA      | elongation factor 1-beta                         | 2,742452846 | 0,205361177 | On |
| 207 | FFKKSIST      | glutamate receptor 6                             | 2,780657019 | 0,436384931 | On |
| 208 | GMGTSVERA     | pyruvate dehydrogenase E1                        | 0,673081668 | 0,259480031 |    |
| 209 | DYDSSDIED     | cactus                                           | 2,047813167 | 0,534272047 |    |
| 210 | EKRASQAF      | stathmin                                         | 1,688917305 | 0,597438619 |    |
| 211 | RRAVSELDA     | tyrosine 3-monooxygenase                         | 0,501618868 | 0,075168775 |    |
| 212 | SDGGYMDMS     | platelet-derived growth factor receptor          | 0,460519071 | 0,099331916 |    |
| 213 | NWHMTPPRK     | serine/threonine protein phosphatase PP1         | 0,697994063 | 0,120586651 |    |
| 214 | RRASI         | pyruvate kinase                                  | 0,544835312 | 0,116552965 |    |
| 215 | AKKGSEQES     | cAMP-dependent protein kinase (PKA)              | 1,455861672 | 0,639268181 |    |
| 216 | DDEMTGYVA     | Mitogen-activated protein kinase p38             | 3,534620401 | 0,580077178 | On |
| 217 | ETDYRKG       | Insulin Receptor (IR)                            | 0,632506055 | 0,111827065 |    |
| 218 | YVTTSTRTY     | vimentin                                         | 3,130524484 | 1,528348632 |    |
| 219 | SPQPSRRGS     | protein phosphatase 1                            | 2,413713843 | 0,281699867 | On |
| 220 | RRAASVA       | pyruvate kinase                                  | 0,688426115 | 0,134407813 |    |
| 221 | RPSENGQP      | Lens fiber major intrinsic protein               | 0,626493223 | 0,144836147 |    |
| 222 | SASTPVKK      | Histone H1                                       | 1,278733611 | 0,475312224 |    |
| 223 | NSYGSRGN      | iron-responsive element binding protein          | 1,015836693 | 0,114695597 |    |

|     |                |                                                         |             |             |    |
|-----|----------------|---------------------------------------------------------|-------------|-------------|----|
| 224 | LRRASL         | pyruvate kinase                                         | 1,068662348 | 0,145186631 |    |
| 225 | SSTDSADSG      | Early E1A                                               | 0,598969909 | 0,160903066 |    |
| 226 | TKSGSTTKN      | eukaryotic translation initiation factor 4E             | 0,494663761 | 0,099913858 |    |
| 227 | VETTYADFI      | cAMP-dependent protein kinase inhibitor alpha           | 0,527835238 | 0,120045678 |    |
| 228 | YSFTTTAER      | Actin                                                   | 0,832158161 | 0,175584308 |    |
| 229 | SPFKYQSLL      | Beta-2 adrenergic receptor                              | 0,970807762 | 0,280675577 |    |
| 230 | RKRSAAE        | Histone H2B                                             | 0,865425059 | 0,075072596 |    |
| 231 | VIKRSPRKR      | transcriptional factor SWI6                             | 0,861739896 | 0,015589519 |    |
| 232 | SPVKSPEAK      | neurofilament triplet M                                 | 0,654102711 | 0,154292646 |    |
| 233 | LRRASVAQL      | pyruvate kinase                                         | 1,472224942 | 0,051724475 | On |
| 234 | PRMPSLSVP      | Sodium channel protein                                  | 0,866658018 | 0,268943334 |    |
| 235 | SSPVYQDAV      | Cortactin                                               | 2,690727504 | 0,443588937 | On |
| 236 | TKDITYDALH     | T-cell surface glycoprotein CD3 zeta                    | 1,168618016 | 0,249504012 |    |
| 237 | LRSPSWEPF      | Heat Shock Protein 26                                   | 0,789475764 | 0,108829149 |    |
| 238 | PSLPTPPTR      | Microtubule-associated protein tau                      | 1,103359856 | 0,076278183 |    |
| 239 | KASASPRRK      | Histone H3                                              | 1,077946236 | 0,020377147 | On |
| 240 | KRRDYDLDA      | Probable receptor with tyrosine-protein kinase activity | 1,501935193 | 0,594707427 |    |
| 241 | PAPAVRASDRA    | Troponin I                                              | 2,076660408 | 0,572629942 |    |
| 242 | QSRASDKQT      | T-cell surface glycoprotein CD3 gamma                   | 0,840328327 | 0,038305981 |    |
| 243 | KGQESFKKQ      | Nucleophosmin                                           | 1,762569581 | 0,292417807 | On |
| 244 | KRSGSVYEP      | phosphorylase b kinase beta                             | 1,544169455 | 0,173258033 | On |
| 245 | KRAQISVRGL     | Glycogen phosphorylase                                  | 2,365808456 | 0,363589042 | On |
| 246 | HSSQSQGGG      | Lamin C                                                 | 0,823771016 | 0,118975723 |    |
| 247 | MAEAYSEIG      | T-cell surface glycoprotein CD3 zeta                    | 1,400150206 | 0,324104461 |    |
| 248 | EEESSYSYE      | RNA polymerase alpha                                    | 1,090021204 | 0,045138812 | On |
| 249 | EQPGSDDDED     | Ornithine decarboxylase                                 | 0,76619227  | 0,166159699 |    |
| 250 | IEQFSTVKG      | G protein-coupled receptor kinase 5                     | 0,749982097 | 0,038582911 |    |
| 251 | MLDHSESTK      | myelin                                                  | 2,507247498 | 0,677855032 | On |
| 252 | PYKFPSSPLRIPGZ |                                                         | 0,907076483 | 0,08110484  |    |
| 253 | GPRTTAQQ       | cGMP-dependent protein kinase (PKG)                     | 2,335495813 | 0,288214292 | On |
| 254 | AQDTYLVLD      | Erythropoietin Receptor                                 | 0,737601543 | 0,135564067 |    |
| 255 | DIPESQMEE      | Band 3 anion transport protein                          | 0,887257077 | 0,077676344 |    |
| 256 | FPRASFGSR      | Desmin                                                  | 1,126711796 | 0,121693393 |    |
| 257 | GRKASGSSP      | myosin light chain kinase                               | 0,814684333 | 0,072866666 |    |
| 258 | EDVGSDEEE      | HSP90-alpha                                             | 3,649330805 | 0,479707921 | On |
| 259 | EPAVSPLLP      | Tyrosine-protein kinase Dash/Abl                        | 0,789767535 | 0,182030115 |    |
| 260 | RRRASQLKI      | Gamma-aminobutyric-acid receptor beta-2                 | 0,50731162  | 0,086437461 |    |
| 261 | SFTTTAERE      | Actin                                                   | 0,672260495 | 0,098356095 |    |
| 262 | PLSRTL         | glycogen synthase                                       | 0,851797508 | 0,098369085 |    |
| 263 | SGRGK          | Histone H4                                              | 0,851218069 | 0,153820177 |    |
| 264 | APRSPGGRR      | Myelin basic protein                                    | 0,866870191 | 0,178773601 |    |
| 265 | DGERYDEDE      | Glycogen [starch] synthase                              | 0,873110194 | 0,173789394 |    |
| 266 | FKRPTLRRV      | troponin I                                              | 1,427611727 | 0,141467581 | On |
| 267 | REAEYEPET      | Cortactin                                               | 1,43558018  | 0,575194139 |    |
| 268 | DRVYIHPF       | Angiotensinogen                                         | 0,707744498 | 0,062274908 |    |
| 269 | VRRISGL        | Histone H4                                              | 0,648588771 | 0,115502005 |    |
| 270 | RRKGTDVNV      | Annexin I                                               | 1,504200133 | 0,321004034 |    |
| 271 | SETKTEEEE      | DNA topoisomerase II                                    | 0,786503872 | 0,243568433 |    |
| 272 | PQRATSNVF      | Myosin regulatory light chain 2                         | 1,467683819 | 0,357585457 |    |
| 273 | RRGSV          | pyruvate kinase or palladin                             | 2,209585477 | 0,664650755 |    |
| 274 | STSKSESSQ      | 40S ribosomal protein S6                                | 4,016161769 | 0,571309198 | On |
| 275 | TRAPSRTAS      | ATP-citrate (pro-S-) lyase                              | 2,748685209 | 0,159732282 | On |
| 276 | VPRTPGGRR      | Myelin basic protein                                    | 1,573122967 | 0,116537306 | On |
| 277 | RASSRSVR       | Lamin B0                                                | 1,039199821 | 0,113357048 |    |
| 278 | SPSSSPASL      | phosphorylcholine transferase                           | 0,947139934 | 0,112219794 |    |
| 279 | RVYVHPF        |                                                         | 2,107514421 | 0,197814243 | On |

|     |                |                                                     |             |             |    |
|-----|----------------|-----------------------------------------------------|-------------|-------------|----|
| 280 | VRRVSDDDR      | Tyrosine 3-monooxygenase                            | 1,821335216 | 0,124516637 | On |
| 281 | SRKMSIQEY      | phosducin                                           | 0,649018601 | 0,026042599 |    |
| 282 | LSGFSEKKS      | myristolated alanine-rich C-kinase substrate        | 1,719885853 | 0,176333289 | On |
| 283 | PSSTSSSSI      | DNA topoisomerase II                                | 0,561376333 | 0,091960099 |    |
| 284 | STGIYEALE      | Alpha enolase                                       | 1,092831318 | 0,240934622 |    |
| 285 | TPPKSPSAS      | Microtubule-associated protein tau                  | 0,978563165 | 0,155274883 |    |
| 286 | LYSSSPGGA      | vimentin                                            | 0,878915408 | 0,176154588 |    |
| 287 | PVPKSPVEE      | neurofilament triplet M                             | 1,093755647 | 0,275606344 |    |
| 288 | KKASFKAKK      |                                                     | 0,850305315 | 0,114392497 |    |
| 289 | KSPAKTPVK      | Actin and myosin binding protein                    | 0,769920999 | 0,126362832 |    |
| 290 | PLSKTLSVSS     | Glycogen [starch] synthase                          | 1,452011997 | 0,232997665 |    |
| 291 | SRGKSSSYS      | Fibrinogen alpha                                    | 1,128377623 | 0,115794053 |    |
| 292 | KKLGSKKPQ      | Sodium channel protein type II alpha                | 0,778923666 | 0,099715618 |    |
| 293 | KTASTRKV       | cystic fibrosis transmembrane conductance regulator | 1,921539485 | 0,162923947 | On |
| 294 | PRRTRRAS       | Protamine YII                                       | 1,058261722 | 0,341197736 |    |
| 295 | IHQRSRRL       | Neutrophil cytosol factor 2                         | 0,697962292 | 0,159410533 |    |
| 296 | NDALSGSGN      | galectin-3                                          | 0,852792893 | 0,068688166 |    |
| 297 | EETQTQDQP      | HSP90-alpha                                         | 0,682951286 | 0,146493671 |    |
| 298 | ERSQSRKDS      | alpha-1B adrenergic receptor                        | 1,391666449 | 0,389401529 |    |
| 299 | IRQASQAGP      | synapsins                                           | 1,06127359  | 0,284283358 |    |
| 300 | NFDDYMKEV      | Fatty acid-binding protein                          | 1,01115957  | 0,13679514  |    |
| 301 | PYKFPSSPLRIPGZ |                                                     | 0,738086283 | 0,065847893 |    |
| 302 | GRRQSLIQD      | tyrosine 3-monooxygenase                            | 0,741855135 | 0,067982202 |    |
| 303 | ASFEYTILD      | Erythropoietin Receptor                             | 0,669299251 | 0,052442226 |    |
| 304 | DLSTYASIN      | Insulin receptor substrate 2                        | 1,165474839 | 0,646550582 |    |
| 305 | GDNDYIPL       | platelet-derived growth factor receptor             | 1,974863506 | 0,547440251 |    |
| 306 | GSESTEDQA      | Alpha-S1 casein                                     | 1,315530975 | 0,223837482 |    |
| 307 | EENVSVDDT      | eukaryotic translation initiation factor 4E         | 1,266806268 | 0,259549141 |    |
| 308 | ERRKSKSGA      | cAMP-regulated phosphoprotein 21                    | 2,801030155 | 0,966078094 |    |
| 309 | RRRSRSRS       | Lamin B receptor                                    | 0,984469987 | 0,130758153 |    |
| 310 | SKIGSLDNI      | Microtubule-associated protein tau                  | 1,14469787  | 0,116902901 |    |
| 311 | NDITSL         | Tropomyosin beta                                    | 0,912616795 | 0,15240141  |    |
| 312 | AARGSFIDAS     | rhodopsin kinase                                    | 2,688819159 | 0,368780555 | On |
| 313 | ARNDSVTVA      | cAMP response element-binding protein CRE-BP1       | 0,780689835 | 0,207951643 |    |
| 314 | DLFGEDEED      | elongation factor 1-beta                            | 1,022437491 | 0,313976519 |    |
| 315 | FSSRSYTSG      | Keratin 8                                           | 0,632457156 | 0,085236756 |    |
| 316 | RGKSSYSK       | Fibrinogen alpha                                    | 1,137888574 | 0,241222101 |    |
| 317 | RKRSRAEA       | Histone H2B                                         | 0,619237095 | 0,216595265 |    |
| 318 | LKRASLG        | pyruvate kinase                                     | 1,034062571 | 0,194866582 |    |
| 319 | RRRPTPATL      | Protein phosphatase inhibitor 1                     | 0,717255613 | 0,074508769 |    |
| 320 | SIADTFVGT      | Serine/threonine-protein kinase STE7                | 0,630701148 | 0,227648431 |    |
| 321 | LRRNSI         | cystic fibrosis transmembrane conductance regulator | 0,693769452 | 0,092003445 |    |
| 322 | RRRRASVA       | pyruvate kinase                                     | 1,889322434 | 0,179324455 | On |
| 323 | TATDYHTTS      | Band 3 anion transport protein                      | 2,54962344  | 0,609226463 | On |
| 324 | TRRASRPVR      | Protamine YII                                       | 2,77053598  | 0,862737594 |    |
| 325 | VSSSYRRM       | vimentin                                            | 3,406930128 | 1,107929281 | On |
| 326 | REVSSLKKNK     | myosin heavy chain                                  | 0,713067183 | 0,077015589 |    |
| 327 | LSYRRYSL       |                                                     | 1,207629607 | 0,251772749 |    |
| 328 | KKKASVA        | pyruvate kinase                                     | 1,329010107 | 0,51872307  |    |
| 329 | WKRTSMKLL      | dihydropyridine-sensitive calcium channel           | 0,869468983 | 0,048435305 |    |
| 330 | SRRQSVLVK      | glutamate receptor 6                                | 0,776651002 | 0,037706289 |    |
| 331 | PENDYEDVE      | Hematopoietic cell-specific LYN substrate           | 0,85469084  | 0,090819093 |    |
| 332 | QEGLYNELQ      | T-cell surface glycoprotein CD3 zeta                | 0,999668465 | 0,295169681 |    |
| 333 | SVPPSPSLS      | Glycogen [starch] synthase                          | 1,598341866 | 0,290363856 |    |
| 334 | TRKVSLAPQ      | cystic fibrosis transmembrane conductance regulator | 2,160286012 | 0,576514716 |    |
| 335 | PKDPSQRRR      | Proto-oncogene tyrosine-protein kinase Src          | 1,171302855 | 0,139696215 |    |



|     |                |                                                           |             |             |    |
|-----|----------------|-----------------------------------------------------------|-------------|-------------|----|
| 336 | KRKQISVR       | Glycogen phosphorylase                                    | 1,509219347 | 0,098427209 | On |
| 337 | KLRRSSSVG      | Acetylcholine receptor protein delta                      | 1,344818084 | 0,048861175 | On |
| 338 | LDPLSEPED      | Thyroid hormone receptor alpha                            | 0,659963124 | 0,138435812 |    |
| 339 | QAGMTAPGT      | calponin alpha and beta                                   | 1,231109297 | 0,167419065 |    |
| 340 | SRRASRPVR      | Protamine Z                                               | 0,643975672 | 0,015404191 |    |
| 341 | KPGFSPQPS      |                                                           | 1,13937107  | 0,253759215 |    |
| 342 | LLPMSPEEF      | Signal Transducer and Activator of Transcription 1        | 1,587778029 | 0,795984582 |    |
| 343 | QLNDSSEEE      | E7 protein                                                | 1,390662906 | 0,180987905 |    |
| 344 | KGGSYSQAA      | HLA class I histocompatibility antigen B7                 | 0,613760282 | 0,08083851  |    |
| 345 | NIYISPLKS      | Retinoblastoma-associated protein                         | 0,719355131 | 0,105865117 |    |
| 346 | EIRVSINEK      | cGMP-dependent protein kinase (PKG)                       | 3,304474496 | 0,53741528  | On |
| 347 | ESRISLPLP      | vimentin                                                  | 0,663842201 | 0,063484275 |    |
| 348 | KRPSIRAKA      | Myelin basic protein                                      | 0,985435511 | 0,088882079 |    |
| 349 | NPGFYVEAN      | 1-phosphatidylinositol-4,5-bisphosphate phosphodiesterase | 2,377516502 | 0,298379305 | On |
| 350 | PYKFPSSPLRIPGZ |                                                           | 2,277551163 | 1,134008392 |    |
| 351 | GSRGSGSSV      | Desmin                                                    | 1,093083264 | 0,380533897 |    |
| 352 | DAGASPVEK      | myristolated alanine-rich C-kinase substrate (MARCKS)     | 2,668723187 | 1,186568635 |    |
| 353 | DRRVSVAAE      | cAMP-dependent protein kinase II (PKA)                    | 0,923476739 | 0,200976982 |    |
| 354 | GGRASDYKS      | Myelin basic protein                                      | 0,814963215 | 0,088530199 |    |
| 355 | GVDTYVEMR      | Macrophage colony stimulating factor I receptor           | 0,717085688 | 0,081427629 |    |
| 356 | EGTHSTKRG      | Fibrinogen alpha                                          | 0,709085362 | 0,069328816 |    |
| 357 | ESLESYEIN      | Matrix Gla-protein                                        | 1,898800109 | 0,750494445 |    |
| 358 | RVRKTKGKY      | glutamate receptor 1                                      | 1,77604585  | 0,032595481 | On |
| 359 | SNPEYLSAS      | Insulin Receptor (IR)                                     | 1,093432969 | 0,067909254 |    |
| 360 | RRSTVA         | Protamines Z1 and Z2                                      | 2,201089459 | 0,061240938 | On |
| 361 | AEPGSPTAA      | myristolated alanine-rich C-kinase substrate (MARCKS)     | 0,714162052 | 0,062807571 |    |
| 362 | AVDGYVKPQ      | Signal Transducer and Activator of Transcription 5        | 1,140803625 | 0,068822144 |    |
| 363 | DPGVSYRTR      | pyruvate dehydrogenase E1                                 | 1,191784254 | 0,204483457 |    |
| 364 | GEINTEDDD      | calsequestrin                                             | 1,78233579  | 0,730139103 |    |
| 365 | RLSISTESQ      | phosphorylase b kinase alpha                              | 1,281049314 | 0,518071726 |    |
| 366 | RKEISVR        | Glycogen phosphorylase                                    | 0,812247482 | 0,068709735 |    |
| 367 | PGSPQKR        | Histone H2                                                | 1,754693342 | 0,502437308 |    |
| 368 | RSGYSSPGS      | Microtubule-associated protein tau                        | 4,228174959 | 1,559470657 | On |
| 369 | SLRASTSKS      | 40S ribosomal protein S6                                  | 1,657277646 | 0,058107955 | On |
| 370 | VRKISGL        | Histone H4                                                | 0,776623691 | 0,140656993 |    |
| 371 | ADGVYAASG      | Tyrosine-protein kinase transforming protein Fes          | 0,620670367 | 0,17515123  |    |
| 372 | TGFLTEYVA      | myelin                                                    | 0,77139777  | 0,186834968 |    |
| 373 | TVSTSLGHS      | muscarinic acetylcholine receptor M2                      | 0,853622053 | 0,116222843 |    |
| 374 | YDKEYYSVH      | Receptor tyrosine kinase for hepatocyte growth factor     | 1,405927237 | 0,261568207 |    |
| 375 | RKLKSQGTR      | spermatid nuclear transition protein 2                    | 0,547014107 | 0,049498534 |    |
| 376 | NRKPSKDKD      | Gamma-aminobutyric-acid receptor gamma                    | 2,236186088 | 0,464154613 | On |
| 377 | LRRASPG        | pyruvate kinase                                           | 1,510157429 | 0,492205149 |    |
| 378 | YMAPYDNYV      | platelet-derived growth factor receptor                   | 1,223363191 | 0,064980225 | On |
| 379 | SSKAYGNGY      | Beta-2 adrenergic receptor                                | 0,814645984 | 0,180131567 |    |
| 380 | PLTPSGEAP      | EGF Receptor                                              | 2,331539863 | 1,006788363 |    |
| 381 | RRRRPTPA       | pyruvate kinase                                           | 2,495869107 | 0,422863082 | On |
| 382 | TEGQYQPQP      | Proto-oncogene tyrosine-protein kinase Lck                | 1,249291855 | 0,173570327 |    |
| 383 | TSSSIFDI       | DNA topoisomerase II                                      | 0,907201713 | 0,287324083 |    |
| 384 | PPSPSLSRH      | Glycogen [starch] synthase                                | 1,642741668 | 0,119479936 | On |
| 385 | SSKRAKAK       | Myosin regulatory light chain 2                           | 3,609559934 | 0,722883884 | On |
| 386 | KRKNSILNP      | cystic fibrosis transmembrane conductance regulator       | 0,839216894 | 0,110866629 |    |
| 387 | LNRMSFASN      | acetyl-CoA carboxylase                                    | 1,035080808 | 0,117121035 |    |
| 388 | QRHGSKYLA      | Myelin basic protein                                      | 0,948190222 | 0,080769013 |    |
| 389 | SRTASFSES      | ATP-citrate (pro-S-) lyase                                | 3,677554954 | 0,229567421 | On |
| 390 | KRPSDRAKA      | Myelin basic protein                                      | 0,926509647 | 0,165395576 |    |
| 391 | LRGPSWDPF      | Heat Shock Protein 27                                     | 0,976493316 | 0,331091501 |    |



|     |                |                                                           |             |             |    |
|-----|----------------|-----------------------------------------------------------|-------------|-------------|----|
| 392 | QRSTSTPNV      | RAF proto-oncogene ser/thr-protein kinase                 | 0,536833937 | 0,154878362 |    |
| 393 | HDALSGSGN      | galectin-3                                                | 0,693912708 | 0,063176965 |    |
| 394 | KRPSQRAKY      | Myelin basic protein                                      | 0,9344076   | 0,054754945 |    |
| 395 | EDNEYTARE      | Tyrosine-protein kinase Hck                               | 2,156120611 | 1,050623058 |    |
| 396 | ENAFSPSRS      | caldesmon                                                 | 0,83990051  | 0,154161575 |    |
| 397 | HKSGYLSSE      | Connection of cytoskeletal structure to plasma membrane   | 1,527926546 | 0,106603753 | On |
| 398 | LAYESHESM      | Matrix Gla-protein                                        | 0,819197896 | 0,082757815 |    |
| 399 | PYKFPSSPLRIPGZ |                                                           | 3,875410144 | 0,870992071 | On |
| 400 | GHQGTVPSPD     | Beta-2 adrenergic receptor                                | 1,390255652 | 0,220812125 |    |
| 401 | ANDEYFIRK      | Acetylcholine receptor protein beta                       | 1,048585208 | 0,221983366 |    |
| 402 | DEASTTVSK      | Rhodopsin                                                 | 0,626853663 | 0,033146965 |    |
| 403 | FEARYQQPF      | 1-phosphatidylinositol-4,5-bisphosphate phosphodiesterase | 1,784767503 | 0,493999658 |    |
| 404 | GLLRSWNDP      | Prolactin                                                 | 0,704364672 | 0,052262971 |    |
| 405 | DTVTSQRA       | Proto-oncogene tyrosine-protein kinase Src                | 3,586094156 | 0,759542159 | On |
| 406 | EKHHSIDAQ      | Phosphoenolpyruvate carboxylase 1                         | 2,038443421 | 0,367683642 | On |
| 407 | RRASTIEMP      | Cardiac phospholamban                                     | 1,833904337 | 0,17207648  | On |
| 408 | SDEESNDDS      | calsequestrin                                             | 1,062104311 | 0,289334845 |    |
| 409 | NVFSSPGGT      | Actin and myosin binding protein                          | 0,843417061 | 0,132704899 |    |
| 410 | RRASF          | pyruvate kinase                                           | 2,998668785 | 0,314848943 | On |
| 411 | AKGGTVKAA      | annexin IV                                                | 1,042193786 | 0,261559824 |    |
| 412 | DDEITQDEN      | muscarinic acetylcholine receptor M2                      | 1,067160937 | 0,209471227 |    |
| 413 | ETDDYAEII      | Focal adhesion kinase                                     | 0,683593015 | 0,396747316 |    |
| 414 | YTTNSPSKI      | transcriptional factor SWI7                               | 0,98242201  | 0,187967978 |    |
| 415 | SPLKSPYKI      | Retinoblastoma-associated protein                         | 0,836149058 | 0,223750322 |    |
| 416 | RKRRTRKE       | Histone H2B                                               | 1,110211483 | 0,259898332 |    |
| 417 | RPPGFTPFR      |                                                           | 0,799945298 | 0,084252238 |    |
| 418 | SASGTPNKE      | caldesmon                                                 | 0,62833505  | 0,098803764 |    |
| 419 | NSVDTSSLS      | Glycogen [starch] synthase                                | 0,571051852 | 0,210881476 |    |
| 420 | LRANSI         | cystic fibrosis transmembrane conductance regulator       | 1,24780823  | 0,235244138 |    |
| 421 | SSSSPSRR       | Lamin B receptor                                          | 1,590729569 | 0,349937166 |    |
| 422 | TKSASFLKG      | nodulin-26                                                | 1,076002477 | 0,133034582 |    |
| 423 | VESLSSSEE      | Beta casein                                               | 1,67918276  | 0,720837533 |    |
| 424 | YRRNSVRFL      | Neutrophil cytosol factor 3                               | 1,937958704 | 0,240454378 | On |
| 425 | SPALTGDEA      | Insulin receptor substrate 4                              | 2,831353865 | 0,292478421 | On |
| 426 | RKQITVR        | Glycogen phosphorylase                                    | 0,766029765 | 0,224211903 |    |
| 427 | VHNRSKINL      | HMG-CoA reductase                                         | 0,943233532 | 0,088204406 |    |
| 428 | SPVHSIADE      | fructose-1,6-bisphosphatase                               | 0,847113085 | 0,086298433 |    |
| 429 | LRRASLGAF      | pyruvate kinase                                           | 0,771583814 | 0,02364779  |    |
| 430 | PRKGSPRKG      | Histone H2B.2                                             | 1,822516496 | 0,749920429 |    |
| 431 | SSPGSPGTP      | Microtubule-associated protein tau                        | 0,880739898 | 0,302935044 |    |
| 432 | TKAASEKKT      | myelin                                                    | 0,551152869 | 0,161990248 |    |
| 433 | LRRSSSVGY      | Acetylcholine receptor protein delta                      | 2,302038812 | 0,365194781 | On |
| 434 | PSEKSEEIT      | astrocytic phosphoprotein PEA-15                          | 0,595399705 | 0,135434679 |    |
| 435 | KAQEYFNIK      | Acetylcholine receptor protein delta                      | 0,668747968 | 0,065811717 |    |
| 436 | KRQSSTSNA      | phosphorylase b kinase beta                               | 1,85602375  | 0,187410843 | On |
| 437 | QKRPSQRSKYL    | Myelin basic protein                                      | 1,235555239 | 0,476648734 |    |
| 438 | QSPSSSPH       | phosphorylcholine transferase                             | 2,412787484 | 0,556538764 | On |
| 439 | KGHEYTNIK      | Protein-tyrosine phosphatase 2                            | 0,674246123 | 0,101314285 |    |
| 440 | KRRSSSYHV      | Sodium channel protein type II alpha                      | 2,206439309 | 0,264330496 | On |
| 441 | KAKQISVRGL     | Glycogen phosphorylase                                    | 1,126037459 | 0,02234093  | On |
| 442 | HSIYSSDDD      | Myb proto-oncogene protein                                | 1,447613408 | 0,567101152 |    |
| 443 | LVMQTAAGT      | myosin light chain kinase                                 | 0,778613153 | 0,051609573 |    |
| 444 | EEELYLEPL      | Tyrosine-protein kinase receptor                          | 0,740602885 | 0,135885409 |    |
| 445 | EQLSTSEEN      | Alpha-S2 casein                                           | 2,256755231 | 0,567829139 | On |
| 446 | IDMESQERI      | Transcription factor AP-1                                 | 1,746002885 | 0,191532447 | On |
| 447 | MILLSELSR      | eukaryotic translation initiation factor 4F               | 1,589405822 | 0,34956864  |    |

|     |                |                                                       |             |             |    |
|-----|----------------|-------------------------------------------------------|-------------|-------------|----|
| 448 | PYKFPSSPLRIPGZ |                                                       | 1,465051197 | 0,567600955 |    |
| 449 | GPAASPAAA      | myristolated alanine-rich C-kinase substrate (MARCKS) | 0,662952275 | 0,154169101 |    |
| 450 | AQAASPAKG      | Protein tyrosine phosphatase 1B                       | 1,239861345 | 0,404752724 |    |
| 451 | DHSRSTKAA      | myelin                                                | 0,989789    | 0,070846735 |    |
| 452 | FPFHSPSRL      | Alpha crystallin B                                    | 1,230570431 | 0,136261884 |    |
| 453 | GRILTLPRS      | Insulin Receptor (IR)                                 | 0,90942493  | 0,092621645 |    |
| 454 | EDVGSDEED      | Heat Shock Protein 90-beta                            | 0,850157352 | 0,210794984 |    |
| 455 | ENTVSTSLG      | muscarinic acetylcholine receptor M2                  | 0,698634509 | 0,2048102   |    |
| 456 | RRQHSYDTF      | glutamate (NMDA) receptor epsilon                     | 1,166859815 | 0,223901063 |    |
| 457 | SFMMTPYVV      | Stress-activated protein kinase JNK1                  | 0,667362689 | 0,074172236 |    |
| 458 | PGTESFVNA      | Beta-2 adrenergic receptor                            | 1,353722234 | 0,136409545 | On |
| 459 | SDEEV          | Troponin T                                            | 0,767134834 | 0,087498605 |    |
| 460 | APQTPGGRR      | Myelin basic protein                                  | 1,830907223 | 0,076282424 | On |
| 461 | DFPLSPPKK      | stathmin                                              | 1,2915712   | 0,16481821  |    |
| 462 | FKAFSPKGS      | Actin and myosin binding protein                      | 2,119764832 | 0,047203619 | On |
| 463 | RDSNYISKG      | platelet-derived growth factor receptor               | 0,738507412 | 0,134917215 |    |
| 464 | DDEESESD       | synaptic vesicle amine transporter                    | 1,267385046 | 0,073872375 | On |
| 465 | VKRISGL        | Histone H4                                            | 1,403382689 | 0,480472136 |    |
| 466 | RRKDYPALH      |                                                       | 0,875087584 | 0,135329513 |    |
| 467 | SEKKSGLG       | myelin                                                | 1,489905968 | 0,102995367 | On |
| 468 | PPSAYGSVK      | Annexin II                                            | 0,799307689 | 0,009407079 |    |
| 469 | RRFSV          | pyruvate kinase                                       | 0,727178572 | 0,045063362 |    |
| 470 | STRRSVGRS      | multidrug resistance protein 1                        | 0,855854836 | 0,215210042 |    |
| 471 | TQSTSGRRR      | cAMP response element-binding protein CRE-BP2         | 2,863717521 | 0,336022975 | On |
| 472 | VNELSKDIG      | Alpha-S1 casein                                       | 2,875274525 | 0,696451319 | On |
| 473 | RAGETRFTD      | elongation factor 3                                   | 1,908345022 | 0,663204873 |    |
| 474 | SPSPSFRWP      | phosphorylcholine transferase                         | 1,230008061 | 0,347286639 |    |
| 475 | RVSGSRR        | Lamin C                                               | 2,778084391 | 0,26519266  | On |
| 476 | VRLRSSVPG      | vimentin                                              | 0,857567837 | 0,161070986 |    |
| 477 | SRKLSDFGQ      | Phenylalanine-4-hydroxylase                           | 1,431089395 | 0,083843738 | On |
| 478 | LSGFSEKKN      | myristolated alanine-rich C-kinase substrate          | 0,761034818 | 0,085816361 |    |
| 479 | PSRRSRSRS      | Lamin B receptor                                      | 1,609330645 | 0,3111552   |    |
| 480 | STDYYREGP      | TrkC tyrosine kinase                                  | 0,628002663 | 0,157103551 |    |
| 481 | TPAISPSKR      | deoxyuridine 5'-triphosphate nucleotidohydrolase      | 0,880796713 | 0,186412025 |    |
| 482 | LVVASAGPT      | RNA polymerase alpha                                  | 3,051645564 | 0,358006415 | On |
| 483 | PVPEYINQS      | EGF Receptor                                          | 0,675292015 | 0,106079847 |    |
| 484 | KKAESPVKE      | neurofilament triplet M                               | 0,691413891 | 0,028787999 |    |
| 485 | KSLNYIDLD      | Insulin receptor substrate 5                          | 1,082700952 | 0,224042487 |    |
| 486 | KRKQISVRGL     | Glycogen phosphorylase                                | 0,816549823 | 0,032752838 |    |
| 487 | SRGDYMTMQ      | Insulin receptor substrate 6                          | 0,861042547 | 0,221002561 |    |
| 488 | KKKSGGEDD      | eukaryotic translation initiation factor 4F           | 0,684562016 | 0,095702756 |    |
| 489 | KTSPSSSPA      | phosphorylcholine transferase                         | 1,116437042 | 0,675483417 |    |
| 490 | PRRRSSFGI      | Acetylcholine receptor protein gamma                  | 3,503184847 | 0,748959971 | On |
| 491 | IGSVSEDNS      | acetyl-CoA carboxylase                                | 0,786827046 | 0,085166988 |    |
| 492 | NAPVSALGE      | Myb proto-oncogene protein                            | 0,611466805 | 0,12293596  |    |
| 493 | EETPYSYPT      | Paxillin                                              | 2,441793895 | 0,141967747 | On |
| 494 | ERSPSPSFR      | phosphorylcholine transferase                         | 2,418490155 | 0,873964298 |    |
| 495 | IRKYTMRRL      | Receptor tyrosine-protein kinase erbB-2               | 1,240072159 | 0,154641117 |    |
| 496 | NEEESYSY       | RNA polymerase alpha                                  | 1,068990548 | 0,261539648 |    |
| 497 | PYKFPSSPLRIPGZ |                                                       | 1,196321882 | 0,193106039 |    |
| 498 | GRRQSLIED      | Tyrosine 3-monooxygenase                              | 0,753581047 | 0,130395723 |    |
| 499 | ASATSSSGG      | Glycogen [starch] synthase                            | 0,839312572 | 0,105943977 |    |
| 500 | DLPMSPRTL      | Signal Transducer and Activator of Transcription 3    | 0,817864121 | 0,055387129 |    |
| 501 | GDLQSAEFH      | Cystatin                                              | 1,091426706 | 0,212851548 |    |
| 502 | GSEEMYNMD      | Insulin receptor substrate 3                          | 2,968238757 | 0,071604199 | On |
| 503 | EENTYDEYE      | Cortactin                                             | 0,960932068 | 0,115132943 |    |

|     |                |                                                           |             |             |    |
|-----|----------------|-----------------------------------------------------------|-------------|-------------|----|
| 504 | ERRKSHEAE      | stathmin                                                  | 0,639759342 | 0,181199284 |    |
| 505 | RRRVTSATR      | glial fibrillary acidic protein                           | 1,654593925 | 0,081502162 | On |
| 506 | SKDSSKRGR      | myelin                                                    | 3,114940581 | 0,072026258 | On |
| 507 | MSVEEV         | eukaryotic translation initiation factor 4E               | 0,689152743 | 0,296361493 |    |
| 508 | AALESEDED      | eukaryotic translation initiation factor 4F               | 1,350066613 | 0,32527701  |    |
| 509 | ARKSTRRSI      | pleckstrin                                                | 0,652719207 | 0,271794881 |    |
| 510 | DLFGSDDEE      | elongation factor 1-beta                                  | 3,303293778 | 1,151647798 |    |
| 511 | FRRLSISTE      | phosphorylase b kinase alpha                              | 0,979152805 | 0,092074027 |    |
| 512 | RGAISAEVY      | cAMP-dependent protein kinase (PKA)                       | 0,760041411 | 0,200259612 |    |
| 513 | RKISASEF       |                                                           | 1,068126472 | 0,436710624 |    |
| 514 | LHRASLG        | pyruvate kinase                                           | 4,598544094 | 2,119969563 |    |
| 515 | RRRPTPAML      | Dopamine- and cAMP-regulated neuronal phosphoprotein      | 1,288684702 | 0,371627706 |    |
| 516 | SGYSSPGSP      |                                                           | 0,421415113 | 0,044018455 |    |
| 517 | LGEGTP         | Calgranulin B                                             | 1,044427688 | 0,178662347 |    |
| 518 | RRLSSLRA       | 40S ribosomal protein S6                                  | 1,091688982 | 0,138096521 |    |
| 519 | TAESSQAE       | Neuromodulin                                              | 0,901774123 | 0,191727398 |    |
| 520 | TRRASFSAQ      | Regulatory protein ADR1                                   | 0,954347206 | 0,161509372 |    |
| 521 | VSRTSAVPT      | Desmin                                                    | 0,713509544 | 0,16528714  |    |
| 522 | REQLSTSEE      | Alpha-S2 casein                                           | 0,735326719 | 0,201477239 |    |
| 523 | LSYRGYSL       |                                                           | 0,782510883 | 0,189927144 |    |
| 524 | KASGSSP        |                                                           | 0,892805769 | 0,040755603 |    |
| 525 | VVGGSRLGA      | Protein tyrosine phosphatase 1B                           | 3,327306    | 0,236774181 | On |
| 526 | SRRPSYRKI      | cAMP response element binding protein                     | 1,470065451 | 0,099863547 | On |
| 527 | PEGDYEEVL      | Hematopoietic cell-specific LYN substrate                 | 2,264612201 | 0,050247017 | On |
| 528 | QEGDTDAGL      |                                                           | 0,744747867 | 0,094774888 |    |
| 529 | SVFSSPAS       | caldesmon                                                 | 0,765163338 | 0,108438995 |    |
| 530 | TRKISQTAQ      | ryanodine receptor                                        | 1,321793131 | 0,144205596 | On |
| 531 | PINGSPRTP      | Retinoblastoma-associated protein                         | 1,075606661 | 0,118590976 |    |
| 532 | KQISVRGL       | Glycogen phosphorylase                                    | 1,060128671 | 0,041018659 |    |
| 533 | KLINSIADT      | Serine/threonine-protein kinase STE7                      | 1,136739471 | 0,118119046 |    |
| 534 | LDDQYTSSS      | Tyrosine-protein kinase Tec                               | 2,050569759 | 0,613216572 |    |
| 535 | PYDNYVPSA      | platelet-derived growth factor receptor                   | 0,716272187 | 0,068528549 |    |
| 536 | SRQLSSGVS      | Heat Shock Protein 27                                     | 0,717581285 | 0,078869654 |    |
| 537 | KNIVTPRTP      | Myelin basic protein                                      | 1,005115375 | 0,252948976 |    |
| 538 | LKLASPELE      | Transcription factor AP-2                                 | 2,567072109 | 0,759906878 |    |
| 539 | QLIDSMANS      | mitogen-activated protein kinase kinase 1                 | 0,856936396 | 0,234745346 |    |
| 540 | IVYKSPVVS      |                                                           | 4,414721781 | 2,091616634 |    |
| 541 | NGYISAAEL      | Calmodulin                                                | 1,220988738 | 0,252225052 |    |
| 542 | EILNSPEKA      | 14-3-3 protein alpha/beta/delta/zeta                      | 1,977130798 | 0,45321199  | On |
| 543 | ESPESTEIT      | insulin-like growth factor binding protein 1              | 0,651413845 | 0,289318521 |    |
| 544 | KRPSHRAKA      | Myelin basic protein                                      | 0,637235229 | 0,029123104 |    |
| 545 | NNYVYIDPT      | Mast/stem cell growth factor receptor                     | 1,089124416 | 0,387083081 |    |
| 546 | PYKFPSSPLRIPGZ |                                                           | 0,760954987 | 0,185617855 |    |
| 547 | GSPRTPRRG      | Retinoblastoma-associated protein                         | 1,266022923 | 0,195212381 |    |
| 548 | DADEYLIPQ      | EGF Receptor                                              | 0,667026414 | 0,123219029 |    |
| 549 | DRLVSARSV      | Receptor tyrosine kinase for hepatocyte growth factor     | 2,149728166 | 0,633263088 |    |
| 550 | GGLTSPGLS      | Keratin 8                                                 | 2,622100218 | 0,273389593 | On |
| 551 | GTVPSDNID      | Beta-2 adrenergic receptor                                | 0,60343379  | 0,029117526 |    |
| 552 | EGSAYEEVP      | 1-phosphatidylinositol-4,5-bisphosphate phosphodiesterase | 1,01743147  | 0,120044147 |    |
| 553 | ESIISQETY      | Alpha-S2 casein                                           | 0,846340067 | 0,180194668 |    |
| 554 | RVRKSKGKY      | glutamate receptor 2                                      | 0,78355977  | 0,069803761 |    |
| 555 | SNDSTSVSA      | muscarinic acetylcholine receptor M2                      | 4,035336997 | 0,362635074 | On |
| 556 | RRPTVA         | Protein phosphatase inhibitor 2                           | 1,775422725 | 0,132430144 | On |
| 557 | AEPDYGALY      | 1-phosphatidylinositol-4,5-bisphosphate phosphodiesterase | 1,105290472 | 0,151337418 |    |
| 558 | AVASSPSKA      | myristolated alanine-rich C-kinase substrate (MARCKS)     | 0,885561504 | 0,179802354 |    |
| 559 | DPGTSYRTR      | pyruvate dehydrogenase E1                                 | 2,250560712 | 0,807641306 |    |

|     |                |                                                  |             |             |    |
|-----|----------------|--------------------------------------------------|-------------|-------------|----|
| 560 | GEGTYGVVY      | cell division control protein 2                  | 0,688064642 | 0,097660169 |    |
| 561 | RLRLSPSPT      | Lamin C                                          | 1,747173419 | 0,203286201 | On |
| 562 | RKASRKE        | Histone H2B                                      | 1,153704825 | 0,302570637 |    |
| 563 | LRRWSLG        | pyruvate kinase                                  | 1,572456762 | 0,376716911 |    |
| 564 | RRVTSATRR      | glial fibrillary acidic protein                  | 1,104953787 | 0,119390884 |    |
| 565 | SLQASIVTD      | guanine nucleotide-binding protein alpha         | 0,828667024 | 0,19212457  |    |
| 566 | RRATPA         | pyruvate kinase                                  | 1,090407396 | 0,084735771 |    |
| 567 | ADGIYAASG      | Tyrosine-protein kinase transforming protein Fes | 0,789317571 | 0,063670335 |    |
| 568 | TGDTYTAHA      | Tyrosine-protein kinase Dash/Abl                 | 0,892980424 | 0,233831369 |    |
| 569 | TVSKTETSQ      | Rhodopsin                                        | 1,94327631  | 0,227098589 | On |
| 570 | WTSDTQGDE      | 14-3-3 protein zeta                              | 2,445386468 | 0,650490853 | On |
| 571 | RKFSSARPE      | Sodium channel protein                           | 2,39235729  | 0,549022834 | On |
| 572 | KKKKASVA       | pyruvate kinase                                  | 1,536919731 | 0,146612755 | On |
| 573 | LRRASLG        | pyruvate kinase                                  | 1,068989346 | 0,271979894 |    |
| 574 | YKNDYYRKR      | Ros proto-oncogene tyrosine kinase               | 0,61494953  | 0,09620711  |    |
| 575 | SSEITTKDL      | Prothymosin                                      | 1,369676973 | 0,615120565 |    |
| 576 | PLSRTLVS       | glycogen synthase                                | 0,924038126 | 0,213010617 |    |
| 577 | LRRASLRG       | pyruvate kinase                                  | 1,423593032 | 0,32939739  |    |
| 578 | TEGQYELQP      | Tyrosine-protein kinase Blk                      | 0,691925049 | 0,05708564  |    |
| 579 | TSPSSPAS       | phosphorylcholine transferase                    | 1,863591048 | 0,524574957 |    |
| 580 | PPSAYGSVK      | Annexin II                                       | 0,958873886 | 0,249479922 |    |
| 581 | RTKRSGSV       | phosphorylase b kinase beta                      | 1,191675288 | 0,20007864  |    |
| 582 | KRFGSKAHM      | nitric-oxide synthase                            | 1,253430043 | 0,244480049 |    |
| 583 | LNDSEEEED      | E7 protein                                       | 1,538036609 | 0,38470506  |    |
| 584 | QRATSNVFA      | Myosin regulatory light chain 3                  | 0,773314357 | 0,1893127   |    |
| 585 | SRSRTPSLP      |                                                  | 1,867384469 | 0,819574572 |    |
| 586 | KRPSARAKA      | Myelin basic protein                             | 1,107991997 | 0,308763478 |    |
| 587 | LRAPSWIDT      | Alpha crystallin B                               | 1,438831412 | 0,470840473 |    |
| 588 | QRRTSVSGE      | cAMP-dependent protein kinase                    | 0,752300742 | 0,218159425 |    |
| 589 | HATPSPVD       | Myb proto-oncogene protein                       | 0,949903437 | 0,158608221 |    |
| 590 | KRPSQRAKA      | Myelin basic protein                             | 0,947740114 | 0,068312277 |    |
| 591 | EDAESEDEE      | Nucleophosmin                                    | 1,067723707 | 0,160412452 |    |
| 592 | ENAEYLRVA      | EGF Receptor                                     | 0,707629884 | 0,261422078 |    |
| 593 | HKRKSSQAL      | Transforming protein erbA                        | 1,583609626 | 0,439395048 |    |
| 594 | LAYESHESL      | Matrix Gla-protein                               | 0,836600275 | 0,076210668 |    |
| 595 | PYKFPSSPLRIPGZ |                                                  | 0,742961726 | 0,221775849 |    |
| 596 | GGVDYKNIH      | Macrophage colony stimulating factor I receptor  | 0,700385947 | 0,082030193 |    |
| 597 | ALRPSTSR       | vimentin                                         | 1,763004822 | 0,516902667 |    |
| 598 | DEAATKTQT      | myosin II heavy chain                            | 0,922219273 | 0,294633702 |    |
| 599 | FARKSTRRS      | pleckstrin                                       | 0,856334207 | 0,094823302 |    |
| 600 | GLGESRKDK      | myelin                                           | 1,39290204  | 0,487399787 |    |
| 601 | DTHRTPSRS      | Proto-oncogene tyrosine-protein kinase Src       | 0,848999626 | 0,021436253 |    |
| 602 | EKESSNDST      | muscarinic acetylcholine receptor M2             | 3,064732702 | 0,03490472  | On |
| 603 | RRAISGDLT      | dihydropyridine-sensitive calcium channel        | 1,529814558 | 0,172737279 | On |
| 604 | SAYRSVDEV      | 2-oxoisovalerate dehydrogenase alpha             | 0,562016319 | 0,021139314 |    |
| 605 | NTVSTSLGH      | muscarinic acetylcholine receptor M2             | 0,691139555 | 0,08393816  |    |
| 606 | RASLG          |                                                  | 0,513508934 | 0,07658569  |    |
| 607 | AKDASKRGR      | myelin                                           | 0,855067107 | 0,077555066 |    |
| 608 | DDEASTTVS      | Rhodopsin                                        | 1,289946807 | 0,154003164 |    |
| 609 | ETAESSQAE      | Neuromodulin                                     | 2,280715059 | 1,027413993 |    |
| 610 | YTRFSLARQ      | Transferrin receptor protein 1                   | 1,352953594 | 0,133571648 | On |
| 611 | SPKQSPSSS      | phosphorylcholine transferase                    | 0,727869557 | 0,131085769 |    |
| 612 | RKRSRKE        | Histone H2B                                      | 0,840043942 | 0,128402593 |    |
| 613 | RPPGFSPFR      |                                                  | 2,86273723  | 1,296280646 |    |
| 614 | SARVYENVG      | Protein-tyrosine phosphatase 3                   | 2,939199028 | 0,403627778 | On |
| 615 | NRSASEPSL      | RAF proto-oncogene ser/thr-protein kinase        | 1,264595018 | 0,25721402  |    |

|     |                |                                                           |             |             |    |
|-----|----------------|-----------------------------------------------------------|-------------|-------------|----|
| 616 | KGYSLG         | Lysozyme C                                                | 0,66072143  | 0,095354351 |    |
| 617 | SSSSSPKAE      | myristolated alanine-rich C-kinase substrate (MARCKS)     | 0,610491779 | 0,066189232 |    |
| 618 | TKKTSFVNF      | eukaryotic translation initiation factor 2 beta           | 0,667944081 | 0,083438984 |    |
| 619 | VEPLTPSGE      | EGF Receptor                                              | 2,530406148 | 0,252131438 | On |
| 620 | YRLPSNVQ       | Alpha crystallin A                                        | 0,650647825 | 0,078322718 |    |
| 621 | SPAISIHEI      | phosphorylase b kinase alpha                              | 0,804279506 | 0,179815274 |    |
| 622 | RKQISVR        | Glycogen phosphorylase                                    | 1,554823143 | 0,267777908 |    |
| 623 | VGWPTVRER      | Nef                                                       | 0,992290757 | 0,231101458 |    |
| 624 | QTYRSFHD       | cGMP-dependent protein kinase (PKG)                       | 0,727002789 | 0,005331771 |    |
| 625 | LRRASLGAA      | pyruvate kinase                                           | 0,964544919 | 0,088963666 |    |
| 626 | PRKGGSPKRG     | Histone H2B.2                                             | 1,854912378 | 0,350219092 | On |
| 627 | SSPASLSRA      | phosphorylcholine transferase                             | 0,803756882 | 0,096537432 |    |
| 628 | TKAASEKKS      | myelin                                                    | 1,276668022 | 0,489273752 |    |
| 629 | LRRPSDQEV      | c-Rel proto-oncogene protein                              | 3,496820485 | 0,529354944 | On |
| 630 | PSAPSPQPK      | Tyrosine 3-monooxygenase                                  | 1,08252473  | 0,0638468   |    |
| 631 | KAKVTGRWK      | troponin T                                                | 0,941064712 | 0,267926442 |    |
| 632 | KRPTQRAKY      | Myelin basic protein                                      | 2,088295116 | 0,167715357 | On |
| 633 | PLSRTLVRSL     | Glycogen [starch] synthase                                | 1,10072135  | 0,324353832 |    |
| 634 | QSPGSPLEE      | Neutrophil cytosol factor 5                               | 3,017486576 | 0,738841822 | On |
| 635 | KGGYSQAA       | HLA class I histocompatibility antigen B7                 | 5,39573242  | 0,940281465 | On |
| 636 | KRRRSSKDT      | glutamate (NMDA) receptor subunit zeta 4                  | 0,787712516 | 0,130762636 |    |
| 637 | KAQISVRGL      | Glycogen phosphorylase                                    | 2,531297503 | 1,015286651 |    |
| 638 | HRTPSRSFG      | Proto-oncogene tyrosine-protein kinase Src                | 1,763816986 | 0,289265315 | On |
| 639 | LSGFSEKKN      | myristolated alanine-rich C-kinase substrate              | 1,440254241 | 0,250869464 |    |
| 640 | EEEEYMPME      | Middle T antigen                                          | 0,622541532 | 0,136146493 |    |
| 641 | EQFSTVKGV      | G protein-coupled receptor kinase 6                       | 1,76421994  | 0,743694456 |    |
| 642 | IDKISRIGF      | glycine receptor alpha                                    | 0,876613223 | 0,124309178 |    |
| 643 | MHRQETVDA      | calcium/calmodulin-dependent protein kinase type II alpha | 1,290201513 | 0,19255177  |    |
| 644 | PYKFPSSPLRIPGZ |                                                           | 0,833605625 | 0,069512039 |    |
| 645 | GNHTYQEIA      | Paxillin                                                  | 1,886529138 | 0,640624764 |    |
| 646 | APVASPAAP      | synapsins IA and IB                                       | 0,696159284 | 0,024890551 |    |
| 647 | DGNNSEDES      | caldesmon                                                 | 0,635957887 | 0,20218605  |    |
| 648 | FMTEYVTR       | mitogen-activated protein kinase MSK7                     | 0,841368253 | 0,170573741 |    |
| 649 | GRGLSLSRF      | Myelin basic protein                                      | 1,139504733 | 0,063334703 | On |
| 650 | EDTLSDSDD      | N-myc proto-oncogene protein                              | 0,882414503 | 0,104826    |    |
| 651 | ENQASEEED      | Dopamine- and cAMP-regulated neuronal phosphoprotein      | 1,958612214 | 0,920354118 |    |
| 652 | RRPTSPVSR      | Early E1A                                                 | 1,136772538 | 0,124233885 |    |
| 653 | SFMDSSGLG      | anti-sigma F factor antagonist                            | 0,847910339 | 0,108181455 |    |
| 654 | QKRPSQRSK      | Myelin basic protein                                      | 6,033272747 | 0,286098651 | On |
| 655 | SDEEH          | initiation factor 5A                                      | 0,856638272 | 0,172483942 |    |
| 656 | APLTPGGRR      | Myelin basic protein                                      | 2,913661205 | 1,867515998 |    |
| 657 | DEPSTPYHS      | Protein phosphatase inhibitor 2                           | 0,936336548 | 0,248108766 |    |
| 658 | FGSRSLYGL      | keratin, type II                                          | 1,277495335 | 0,182334961 |    |
| 659 | RDPVTENAV      | muscarinic acetylcholine receptor M2                      | 0,975180442 | 0,246634212 |    |
| 660 | AVRRSDRA       | Troponin I                                                | 0,900882519 | 0,209405189 |    |
| 661 | VKRGSL         | Histone H4                                                | 1,310554221 | 0,422579337 |    |
| 662 | RRKDTPALH      |                                                           | 2,490327431 | 0,342984266 | On |
| 663 | SEITTKDLK      | Prothymosin                                               | 0,961839217 | 0,342342471 |    |
| 664 | PNVSYIASR      | protein kinase shaggy                                     | 2,143714399 | 0,714600721 |    |
| 665 | RRDSV          | pyruvate kinase                                           | 0,703698732 | 0,096844168 |    |
| 666 | STRRSIRLP      | pleckstrin                                                | 0,79354209  | 0,239597941 |    |
| 667 | TPQVSDTMR      | glycogenin                                                | 0,598426542 | 0,238186351 |    |
| 668 | VNATYVNVK      | Receptor tyrosine kinase for hepatocyte growth factor     | 1,157943459 | 0,404896687 |    |
| 669 | RAAHSIKGG      | Chemotaxis protein cheA                                   | 1,773878088 | 0,127501343 | On |
| 670 | SPSLSRHSS      | Glycogen [starch] synthase                                | 1,094757378 | 0,512832259 |    |
| 671 | RTPPPSG        | Myelin basic protein                                      | 0,689412691 | 0,193953867 |    |



|     |                |                                                         |             |             |    |
|-----|----------------|---------------------------------------------------------|-------------|-------------|----|
| 672 | VRKRTLRL       | EGF Receptor                                            | 0,81728557  | 0,09700276  |    |
| 673 | SRKSGFGH       | gap junction beta-1 protein                             | 0,624236773 | 0,051821023 |    |
| 674 | LSGESDLEI      | DNA topoisomerase II                                    | 1,112173454 | 0,160799895 |    |
| 675 | PSQRSKYLA      | Myelin basic protein                                    | 0,96351842  | 0,207866035 |    |
| 676 | STDEYLDLS      | Receptor tyrosine kinase                                | 1,227524966 | 0,304942898 |    |
| 677 | TNHIYSNLA      | Mast/stem cell growth factor receptor                   | 1,536815411 | 0,773884373 |    |
| 678 | LSRHSSPHQ      | Glycogen [starch] synthase                              | 0,779335262 | 0,116923559 |    |
| 679 | PTRHSRVAE      | Lamin                                                   | 0,772117547 | 0,162447822 |    |
| 680 | KISITSRKA      | GTP-binding protein era                                 | 0,792872785 | 0,097724642 |    |
| 681 | KSKISASRK      | troponin I                                              | 0,886482091 | 0,200376777 |    |
| 682 | KRKQISVGGL     | Glycogen phosphorylase                                  | 1,521715937 | 0,429796044 |    |
| 683 | SRALSRQLS      | Heat Shock Protein 27                                   | 0,996308801 | 0,315287908 |    |
| 684 | KKKFSFKKP      | MARCKS-related protein                                  | 1,782815079 | 0,267884952 | On |
| 685 | KTRSSRAGL      | Histone H2A                                             | 2,228500314 | 0,396589213 | On |
| 686 | PAPGSPPEP      | Early E1A                                               | 1,167433696 | 0,287929403 |    |
| 687 | IGSESTEDQ      | Alpha-S1 casein                                         | 1,069688395 | 0,117697702 |    |
| 688 | MRRNSFTPL      | fructose-2,6-bisphosphatase                             | 2,492186462 | 0,535566555 | On |
| 689 | EEQEYVQTV      | Annexin I                                               | 0,883059014 | 0,26043551  |    |
| 690 | ERRVSNAGG      | vasodilator-stimulated phosphoprotein                   | 0,976897821 | 0,114977037 |    |
| 691 | IREESPPTS      | Glycoprotein IV                                         | 0,634641671 | 0,208096239 |    |
| 692 | NDSVYANWM      | Probable receptor with tyrosine-protein kinase activity | 2,738172427 | 0,410102474 | On |
| 693 | PYKFPSSPLRIPGZ |                                                         | 0,844897647 | 0,072825688 |    |
| 694 | GRRESLTSF      | inositol 1,4,5-trisphosphate-binding protein            | 1,079983435 | 0,17337949  |    |
| 695 | ARVFSVLRE      | Ser/Thr poetin phosphatase 2B                           | 1,907894562 | 0,091821044 | On |
| 696 | DLPLSPSAF      | tristetraproline                                        | 1,021078555 | 0,376978737 |    |
| 697 | GDKKSKKAK      | Na+/K+ ATPase 1                                         | 1,026200146 | 0,132726125 |    |
| 698 | GSDVSFNEE      | DNA topoisomerase II                                    | 1,288109755 | 0,325218736 |    |
| 699 | EEKGSPLNA      | Protein tyrosine phosphatase 1B                         | 1,704826836 | 0,077865729 | On |
| 700 | ERQKTQTKL      | myosin light chain kinase                               | 2,630134349 | 0,511057372 | On |
| 701 | RRRSSKDTS      | glutamate (NMDA) receptor subunit zeta 3                | 0,740393072 | 0,18519313  |    |
| 702 | SKAGSLGNI      |                                                         | 2,028540213 | 0,692045516 |    |
| 703 | MSGDEM         | eukaryotic translation initiation factor 2 beta         | 0,899842172 | 0,181061426 |    |
| 704 | AAATTPAAE      | neuromodulin                                            | 1,253408402 | 0,399789008 |    |
| 705 | ARKKSSAQL      | ras-related protein rap-1b                              | 0,788049679 | 0,105256619 |    |
| 706 | DKVTSPTKV      | caldesmon                                               | 1,875884577 | 0,071737743 | On |
| 707 | FRRFTPDSL      | Sodium channel protein                                  | 1,534196571 | 0,331858066 |    |
| 708 | RFTDTRKDE      | elongation factor 4                                     | 0,984633562 | 0,119274058 |    |
| 709 | RKISASEA       |                                                         | 0,820550628 | 0,23260021  |    |
| 710 | LARASLG        | pyruvate kinase                                         | 1,62869574  | 0,282906358 | On |
| 711 | RRRLSSLRA      | 40S ribosomal protein S6                                | 1,12744499  | 0,072056553 |    |
| 712 | SGYISSLEY      | Complement C1r                                          | 3,505696671 | 1,254419481 |    |
| 713 | LARNSI         | cystic fibrosis transmembrane conductance regulator     | 1,637039816 | 0,967962614 |    |
| 714 | TIAVG          | Photosystem Q(A)                                        | 1,770329973 | 0,376221077 |    |
| 715 | TADISEDEE      | phosphorylcholine transferase                           | 0,704476606 | 0,09222162  |    |
| 716 | TRQTSVSGQ      | synapsins IA and IB                                     | 2,313845634 | 1,184199635 |    |
| 717 | VSEEYDLDR      | Fibroblast growth factor receptor 4                     | 1,089019174 | 0,144106711 |    |
| 718 | REQESSGEE      | Protein phosphatase inhibitor 2                         | 1,126085032 | 0,313586323 |    |
| 719 | GTKRSGSV       | phosphorylase b kinase beta                             | 0,68987468  | 0,068925152 |    |
| 720 | NRLQTMKEE      | Lamin C                                                 | 0,829416147 | 0,092007615 |    |
| 721 | VVELSGESD      | DNA topoisomerase II                                    | 0,849654656 | 0,129689347 |    |
| 722 | SRRPSRATW      | Vitronectin                                             | 0,909519004 | 0,190948495 |    |
| 723 | PASQTPNKT      | Proto-oncogene tyrosine-protein kinase Src              | 0,790001848 | 0,119567763 |    |
| 724 | QDPVSPSLV      | muscarinic acetylcholine receptor M2                    | 1,000569883 | 0,16828233  |    |
| 725 | STTVSKTET      | Rhodopsin                                               | 0,816026971 | 0,192641284 |    |
| 726 | TRKISASEF      |                                                         | 0,723091625 | 0,064973575 |    |
| 727 | PGPQSPGSP      | Neutrophil cytosol factor 4                             | 1,113458707 | 0,037247661 | On |



|     |                |                                                         |             |             |    |
|-----|----------------|---------------------------------------------------------|-------------|-------------|----|
| 728 | KQGSGRGL       | Glycogen phosphorylase                                  | 3,943039299 | 0,247776148 | On |
| 729 | KKSWSRWTL      | parathyroid hormone/parathyroid hormone-related peptide | 1,113976055 | 0,131170628 |    |
| 730 | LASSSKEEN      | Cystatin S                                              | 1,073700431 | 0,077010452 |    |
| 731 | PLRRTLVA       | glycogen synthase                                       | 0,604797501 | 0,064741832 |    |
| 732 | SRPSSNRSY      | vimentin                                                | 1,221122736 | 0,230174777 |    |
| 733 | KNDYYRKRK      | Ros proto-oncogene tyrosine kinase                      | 1,265235794 | 0,236253445 |    |
| 734 | LIEDAEYTA      | Proto-oncogene tyrosine-protein kinase Lck, Fyn, Yes    | 1,793169106 | 0,20376097  | On |
| 735 | QKAQTERKS      | troponin T                                              | 0,88040102  | 0,041628936 |    |
| 736 | ISTESQPNG      | phosphorylase b kinase alpha                            | 1,305650098 | 0,451068875 |    |
| 737 | NGNNYVYID      | Mast/stem cell growth factor receptor                   | 3,201305197 | 1,420533613 |    |
| 738 | EIKKSWSRW      | parathyroid hormone/parathyroid hormone-related peptide | 0,693110391 | 0,082437317 |    |
| 739 | ESPASDEAE      | Nonhistone chromosomal protein HMG-14                   | 0,822765036 | 0,072356312 |    |
| 740 | KRKSSQALV      | Transforming protein erbA                               | 1,173446629 | 0,301971041 |    |
| 741 | NNMPSSDDG      | muscarinic acetylcholine receptor M2                    | 1,450926123 | 0,212854416 |    |
| 742 | PYKFPSSPLRIPGZ |                                                         | 3,644650118 | 0,549231961 | On |
| 743 | GSPGTPGSR      |                                                         | 1,200457157 | 0,343224134 |    |
| 744 | AVVRTPPKS      |                                                         | 0,963633138 | 0,21396553  |    |
| 745 | DRKLSTKEA      | multidrug resistance protein 2                          | 2,865070631 | 1,155881239 |    |
| 746 | GGIRSLNVA      | isocitrate dehydrogenase                                | 1,050055288 | 0,246740493 |    |
| 747 | GTRLRLARM      | glial fibrillary acidic protein                         | 1,653814166 | 0,255500949 | On |
| 748 | EGNKSPAPK      | Actin and myosin binding protein                        | 3,050021916 | 0,949491805 | On |
| 749 | ESHESMESY      | Matrix Gla-protein                                      | 3,001065309 | 0,210540981 | On |
| 750 | RVRISADAM      | Troponin I                                              | 1,722962835 | 0,31449145  | On |
| 751 | SNDDSDDDD      | casequestrin                                            | 3,34764043  | 0,103480747 | On |
| 752 | RRPTPA         | Protein phosphatase inhibitor 3                         | 1,530242627 | 0,146809581 | On |
| 753 | AEGSSNVFS      | Myosin regulatory light chain 2                         | 3,101088098 | 0,283027596 | On |
| 754 | AVADSESED      | cAMP-dependent protein kinase II (PKA)                  | 1,147339001 | 0,296001316 |    |
| 755 | DNPDYQQDF      | EGF Receptor                                            | 3,680480395 | 0,680559742 | On |
| 756 | GDVKYADIE      | platelet-derived growth factor receptor                 | 2,090750678 | 0,06486529  | On |
| 757 | RLQDYEEKT      | Connection of cytoskeletal structure to plasma membrane | 1,372198814 | 0,389989114 |    |
| 758 | FKKSFKL        | myristolated alanine-rich C-kinase substrate            | 3,831547532 | 1,211595755 | On |
| 759 | LRRPSLG        | pyruvate kinase                                         | 1,943946618 | 0,357153791 | On |
| 760 | RRVRSQEPG      | somatostatin receptor type 4                            | 0,910227092 | 0,193395948 |    |
| 761 | SLDDSGSAM      | alpha-1B adrenergic receptor                            | 5,126081683 | 0,462496654 | On |
| 762 | RRASVA         | pyruvate kinase                                         | 1,62594712  | 0,416955506 |    |
| 763 | ADDEYAPKQ      | Tyrosine-protein kinase Src64B                          | 0,529326447 | 0,095638191 |    |
| 764 | TESQYQQQP      | Tyrosine-protein kinase Hck                             | 0,719234924 | 0,151102711 |    |
| 765 | TVKSSKGGP      | Annexin I                                               | 0,731823879 | 0,067893116 |    |
| 766 | WTSDSAGEE      | 14-3-3 protein tau                                      | 1,421053918 | 0,127045249 | On |
| 767 | RKAASVIAK      | DNA polymerase beta                                     | 0,734829028 | 0,092746938 |    |
| 768 | LRRASLDG       | pyruvate kinase                                         | 1,847387871 | 0,393756014 | On |
| 769 | LRRASGG        | pyruvate kinase                                         | 0,890374754 | 0,102297685 |    |
| 770 | YHTTSHPGT      | Band 3 anion transport protein                          | 1,42458623  | 0,495359847 |    |
| 771 | SSEESITRI      | Beta casein                                             | 1,541450462 | 0,53633795  |    |
| 772 | PLAGSPVIA      | casein kinase II                                        | 0,730557114 | 0,029849602 |    |
| 773 | LGSPLRRR       | vimentin                                                | 2,865027607 | 0,750096688 | On |
| 774 | TEDQYSLVE      | PI3-kinase p85-alpha                                    | 3,932400592 | 0,829647227 | On |
| 775 | TRTYSLGSA      | vimentin                                                | 1,864542352 | 0,266080339 | On |
| 776 | PPSAYATVK      | Annexin II                                              | 1,112786821 | 0,128922553 |    |
| 777 | RTKRSGSV       | phosphorylase b kinase beta                             | 1,709183981 | 0,31066855  | On |
| 778 | KREASLDNQ      | Phytochrome A                                           | 0,709702652 | 0,274868552 |    |
| 779 | LMDKYHVDN      | Early E2A                                               | 0,692766918 | 0,048271727 |    |
| 780 | QQGMTVYGL      | calponin alpha and beta                                 | 1,413396855 | 0,598845315 |    |
| 781 | SRSRSRSRS      | Lamin B receptor                                        | 3,035240238 | 0,439811536 | On |
| 782 | KRNSSPPPS      |                                                         | 1,268981774 | 0,053388446 | On |
| 783 | LQRYSSDPT      | EGF Receptor                                            | 2,957625518 | 0,506453347 | On |

|     |                |                                                          |             |             |    |
|-----|----------------|----------------------------------------------------------|-------------|-------------|----|
| 784 | QRRTSLTGS      | Volt.-dep. L-type calcium channel alpha-1S               | 2,375802681 | 0,553468385 | On |
| 785 | GVRQSRASD      | T-cell surface glycoprotein CD3 gamma                    | 0,613414124 | 0,11824     |    |
| 786 | KRPSNRAKA      | Myelin basic protein                                     | 1,6968906   | 0,378512443 |    |
| 787 | EAVTSPRFI      | Tyrosine 3-monooxygenase                                 | 0,745421666 | 0,119960947 |    |
| 788 | EMTGYVATR      | Mitogen-activated protein kinase p38                     | 1,352471427 | 0,245038686 |    |
| 789 | HKIKSGAEA      | DNA polymerase beta                                      | 0,809246096 | 0,197754573 |    |
| 790 | LARRSTTDA      | Choriogonadotropin beta                                  | 0,741883762 | 0,307381556 |    |
| 791 | PYKFPSSPLRIPGZ |                                                          | 1,018776378 | 0,232998868 |    |
| 792 | GGTGTPNKE      | Actin and myosin binding protein                         | 1,048188179 | 0,380871029 |    |
| 793 | ALGISYGRK      | TAT protein                                              | 1,17518828  | 0,059485796 | On |
| 794 | DDSGSAMSG      | alpha-1B adrenergic receptor                             | 2,913887222 | 0,680163779 | On |
| 795 | EYVQTVKSS      | Annexin I                                                | 0,632872328 | 0,147318334 |    |
| 796 | GKTDYMGEA      | Beta-2 adrenergic receptor                               | 0,573181922 | 0,190236707 |    |
| 797 | DSTYYKASK      | Focal adhesion kinase                                    | 1,598413403 | 0,190506799 | On |
| 798 | EKEISDDEA      | Heat Shock Protein 90-beta                               | 1,429725387 | 0,112927582 | On |
| 799 | RRADSLQKN      | iron-responsive element binding protein                  | 3,429163517 | 0,542721978 | On |
| 800 | SAYGSVKAY      | Annexin II                                               | 0,639250855 | 0,278294889 |    |
| 801 | NTSSSPQPK      | p53                                                      | 0,844284819 | 0,08903598  |    |
| 802 | GSRRR          | protamine                                                | 2,113763606 | 0,330673262 | On |
| 803 | AKAKTTKKR      | Myosin regulatory light chain 2                          | 1,495372055 | 0,347255565 |    |
| 804 | DDAYSDET       | Protein phosphatase inhibitor 2                          | 2,871146176 | 1,362447907 |    |
| 805 | ESVDYVPMML     | platelet-derived growth factor receptor                  | 0,965458913 | 0,280530473 |    |
| 806 | YSTDYREG       | TrkC tyrosine kinase                                     | 0,759428013 | 0,053825641 |    |
| 807 | SPKKSPRKA      | Histone H4                                               | 0,953947745 | 0,235750942 |    |
| 808 | RKRSRKA        | Histone H2B                                              | 1,025250622 | 0,343885173 |    |
| 809 | RPPASPSQ       | synapsins IA and IB                                      | 1,196678136 | 0,105268811 |    |
| 810 | SARLSAKPA      | Nonhistone chromosomal protein HMG-14                    | 2,010365073 | 0,196800571 | On |
| 811 | NRQSSQARV      | Phytochrome A                                            | 1,123738071 | 0,152688255 |    |
| 812 | KEAKSD         | Nonhistone chromosomal protein HMG-14                    | 1,900164255 | 0,182417023 | On |
| 813 | SSSNTIRRP      | fructose-2,6-bisphosphatase                              | 1,156619459 | 0,195810727 |    |
| 814 | TKKQSFKQT      | cystic fibrosis transmembrane conductance regulator      | 1,739345305 | 0,239098444 | On |
| 815 | VDSAYEVIK      | L-lactate dehydrogenase M                                | 0,682263779 | 0,086627058 |    |
| 816 | YRKSSLKSR      | spermatid nuclear transition protein 3                   | 0,760136254 | 0,168237921 |    |
| 817 | SNVSSTGSI      |                                                          | 1,60618413  | 0,598125895 |    |
| 818 | RARSRKE        | Histone H2B                                              | 0,686963498 | 0,105971068 |    |
| 819 | VGPGYLGSG      | Probable receptor with tyrosine-protein kinase activity  | 2,225346742 | 1,11628415  |    |
| 820 | QTVKSSKGG      | Annexin I                                                | 3,312585973 | 0,143208362 | On |
| 821 | LRMFSFKAP      | Gamma-aminobutyric-acid receptor gamma-2                 | 1,106122861 | 0,333904071 |    |
| 822 | PRHLSNVSS      |                                                          | 0,87970546  | 0,04248335  |    |
| 823 | SSNEYMDMK      | Mast/stem cell growth factor receptor                    | 2,183622519 | 0,964217456 |    |
| 824 | THYGSLPQK      | Myelin basic protein                                     | 0,934438394 | 0,118663768 |    |
| 825 | LRRPSDQAV      | Transforming protein rel                                 | 0,786540825 | 0,134072348 |    |
| 826 | PRRNSRASL      | Sodium channel protein type II alpha                     | 1,110938777 | 0,45776504  |    |
| 827 | KAKTTKKRP      | Myosin regulatory light chain 2                          | 0,960811825 | 0,107662943 |    |
| 828 | KRPSGRAKA      | Myelin basic protein                                     | 1,275049176 | 0,281720505 |    |
| 829 | PLSKTSLVSSL    | Glycogen [starch] synthase                               | 1,410527274 | 0,444697044 |    |
| 830 | QSGMTEYVA      | Mitogen-activated protein kinase FUS3                    | 2,028742735 | 0,898548949 |    |
| 831 | KGATSDEED      | DNA topoisomerase II                                     | 2,440552049 | 1,164900761 |    |
| 832 | KRRNSEFEI      | tryptophan 5-monooxygenase                               | 1,626882191 | 0,202811907 | On |
| 833 | LTRRASFSAQ     | Regulatory protein ADR1                                  | 3,059301324 | 0,464484779 | On |
| 834 | HRQETVEAL      | calcium/calmodulin-dependent protein kinase type II beta | 0,66170679  | 0,028525122 |    |
| 835 | LRRFSLATM      | Cytochrome P450 2B1                                      | 1,627331364 | 0,297316982 |    |
| 836 | EEEAYGWMD      | Gastrin                                                  | 0,754495301 | 0,102820645 |    |
| 837 | EQESSGEED      | Protein phosphatase inhibitor 2                          | 1,937974789 | 0,771820639 |    |
| 838 | IAADSEAEQ      | Insulin receptor substrate 7                             | 0,76029674  | 0,148635473 |    |
| 839 | MGEASGAQL      | Beta-2 adrenergic receptor                               | 1,04377851  | 0,150482306 |    |

|     |                |                                                         |             |             |    |
|-----|----------------|---------------------------------------------------------|-------------|-------------|----|
| 840 | PYKFPSSPLRIPGZ |                                                         | 1,944555035 | 0,474370962 |    |
| 841 | GNGDYMPMS      | Insulin receptor substrate 8                            | 0,792878991 | 0,142434727 |    |
| 842 | APRYPGGRR      | Myelin basic protein                                    | 0,89839832  | 0,189062063 |    |
| 843 | DGNKSPAPK      | caldesmon                                               | 0,87944027  | 0,15587688  |    |
| 844 | FMTEYVATR      | mitogen-activated protein kinase                        | 1,825197232 | 0,717153301 |    |
| 845 | GRASSHSSQ      | Lamin C                                                 | 3,019526393 | 0,755286995 | On |
| 846 | EDSTYYKAS      | Focal adhesion kinase                                   | 1,600233257 | 0,267776992 | On |
| 847 | ENPQYFRQG      | TrkC tyrosine kinase                                    | 2,512039572 | 1,411664299 |    |
| 848 | RRPTPATVA      | Protein phosphatase inhibitor 4                         | 1,555389135 | 0,158433661 | On |
| 849 | SFKLSGFSF      | myristolated alanine-rich C-kinase substrate            | 2,172458934 | 0,859386442 |    |
| 850 | QEKESERLA      | Beta-2 adrenergic receptor                              | 2,882103642 | 1,444879437 |    |
| 851 | RRVSV          | pyruvate kinase                                         | 0,974058983 | 0,056577652 |    |
| 852 | APFTPGGRR      | Myelin basic protein                                    | 0,822518151 | 0,024667964 |    |
| 853 | DEKLSEILG      | RNA polymerase alpha                                    | 0,960088242 | 0,410105904 |    |
| 854 | FGHNTIDAV      | bumetanide-sensitive sodium-(potassium)-chloride cotran | 0,718804915 | 0,096877383 |    |
| 855 | RDEEYGYEA      | Gamma-aminobutyric-acid receptor gamma-2                | 0,60440904  | 0,057075769 |    |
| 856 | AVRRSDAA       | Troponin I                                              | 0,867705774 | 0,061449137 |    |
| 857 | TKRSGSV        | phosphorylase b kinase beta                             | 2,714075109 | 0,39637875  | On |
| 858 | RRKATQVGE      | vasodilator-stimulated phosphoprotein                   | 0,988221166 | 0,093371348 |    |
| 859 | SEGDSSEGE      | Serum response factor                                   | 1,772199568 | 0,118359573 | On |
| 860 | PLDRSSHAQ      | Insulin Receptor (IR)                                   | 0,991878583 | 0,281036586 |    |
| 861 | RRASS          | pyruvate kinase                                         | 1,200223681 | 0,066814307 | On |
| 862 | STPLSPTRI      | Lamin A/C                                               | 1,622757961 | 0,118547815 | On |
| 863 | TPPLSPSRR      | Myc proto-oncogene protein                              | 1,598014815 | 0,396785089 |    |
| 864 | VKRISGLIY      | Histone H4                                              | 0,958552174 | 0,285306963 |    |
| 865 | RAAASRARQ      | cAMP response element-binding protein CRE-BP3           | 3,452058897 | 0,51960214  | On |
| 866 | SPRTPGGRR      | Myelin basic protein                                    | 0,870090108 | 0,075522057 |    |
| 867 | RRRRSVA        | pyruvate kinase                                         | 1,063826739 | 0,193315194 |    |
| 868 | VRFESIRLP      | Choriogonadotropin beta                                 | 2,179612201 | 0,45995572  | On |
| 869 | SRKESYSVY      | Histone H2B                                             | 4,829808133 | 0,798747221 | On |
| 870 | LSELSRRRI      | eukaryotic translation initiation factor 4F             | 2,130647745 | 0,285676921 | On |
| 871 | PSPSSRVTV      | Lamin B1                                                | 0,884524876 | 0,20406475  |    |
| 872 | SSVPTPSPL      | casein kinase II                                        | 1,261190867 | 0,493246769 |    |
| 873 | TNEEYLDLS      | Fibroblast growth factor receptor 2                     | 0,860543868 | 0,109210836 |    |
| 874 | LSRFSWGAE      | Myelin basic protein                                    | 1,599303581 | 0,653564672 |    |
| 875 | PTKRSPTKR      | Histone H2B.1                                           | 0,74242334  | 0,081365487 |    |
| 876 | KISASRLQ       | troponin I                                              | 1,152692451 | 0,18090824  |    |
| 877 | KSFGSPNRI      | cell division protein kinase 7                          | 0,989439253 | 0,035259232 |    |
| 878 | KRKQISVAGL     | Glycogen phosphorylase                                  | 1,044734718 | 0,18702686  |    |
| 879 | SQHSTPPKK      | Large T antigen                                         | 3,461245283 | 1,602370624 |    |
| 880 | KKIDSFASN      | acetyl-CoA carboxylase                                  | 2,006810827 | 0,506184571 |    |
| 881 | KTETSQVAP      | Rhodopsin                                               | 0,876955365 | 0,022879194 |    |
| 882 | PAAPSPGSS      | synapsins IA and IB                                     | 0,751047177 | 0,100175653 |    |
| 883 | IGRFSEPHA      | cGMP-dependent protein kinase (PKG)                     | 0,508197846 | 0,112496947 |    |
| 884 | MQLKSEIKQ      | phosphorylase b kinase alpha                            | 1,094240593 | 0,223639914 |    |
| 885 | EEQEYIKTV      | Annexin I                                               | 1,762863927 | 0,211775102 | On |
| 886 | ERRPSNVSQ      | Sodium channel protein type II alpha                    | 1,722188583 | 0,297959683 | On |
| 887 | IPPHTPVRT      | Retinoblastoma-associated protein                       | 0,441477239 | 0,047405904 |    |
| 888 | NDSTSVSAV      | muscarinic acetylcholine receptor M2                    | 0,343516872 | 0,138377333 |    |
| 889 | PYKFPSSPLRIPGZ |                                                         | 1,75459788  | 0,344413895 | On |
| 890 | GRPITPPRN      | ser/thr protein phosphatase PP1-alpha                   | 1,242476927 | 0,260654962 |    |
| 891 | ARTKRSGSV      | phosphorylase b kinase beta                             | 1,882806875 | 0,309939797 | On |
| 892 | DLPGTEDFV      | Beta-2 adrenergic receptor                              | 0,912248978 | 0,138463021 |    |
| 893 | GALYSGSEG      | Serum response factor                                   | 1,269756124 | 0,343278908 |    |
| 894 | GRVLTLP RS     | Insulin Receptor (IR)                                   | 0,7758225   | 0,217328497 |    |
| 895 | EKESSNDS       | muscarinic acetylcholine receptor M2                    | 1,907708205 | 0,86495102  |    |

|     |                |                                                          |             |             |    |
|-----|----------------|----------------------------------------------------------|-------------|-------------|----|
| 896 | ERNLSFEIK      | protein-tyrosine phosphatase G1                          | 1,533610726 | 0,122833376 | On |
| 897 | RRRRSRRAS      | Protamine Z                                              | 3,528390069 | 0,621455858 | On |
| 898 | SIYSSDDDE      | Myb proto-oncogene protein                               | 1,202946952 | 0,338424501 |    |
| 899 | HGYSLG         | Lysozyme C                                               | 1,66079226  | 0,732687855 |    |
| 900 | AAASFKAQR      |                                                          | 1,646397416 | 0,106591854 | On |
| 901 | ARKFSSARP      | Sodium channel protein                                   | 1,182899181 | 0,225655852 |    |
| 902 | DKEYYSVHN      | Receptor tyrosine kinase for hepatocyte growth factor    | 2,085424066 | 0,970487859 |    |
| 903 | FRKLSFTES      |                                                          | 2,004793213 | 0,243814815 | On |
| 904 | RFHKSSKDS      | myelin                                                   | 1,696585402 | 0,139542012 | On |
| 905 | RAKRSGSV       | phosphorylase b kinase beta                              | 0,621075707 | 0,099091891 |    |
| 906 | KSESSQK        | 40S ribosomal protein S6                                 | 0,967838804 | 0,355106067 |    |
| 907 | RRRLSDSNF      | synapsins                                                | 0,609001952 | 0,097656069 |    |
| 908 | SGKTSPSSS      | phosphorylcholine transferase                            | 0,805800615 | 0,196968489 |    |
| 909 | KSRRTI         | Interleukin-2 receptor alpha                             | 0,764129452 | 0,105474317 |    |
| 910 | TAILE          | Photosystem Q(B)                                         | 2,249020985 | 0,674208442 |    |
| 911 | SYPLSPLSD      | Cytosolic phospholipase A2                               | 1,070110711 | 0,197199358 |    |
| 912 | TRQASQAGP      | synapsins IA and IB                                      | 0,717435411 | 0,061838711 |    |
| 913 | VRVYTHEVV      | cell division control protein 2                          | 2,793877205 | 1,328824469 |    |
| 914 | RENEYMPMA      | Middle T antigen                                         | 1,058613254 | 0,219629012 |    |
| 915 | GRGLSLSR       | Myelin basic protein                                     | 1,193243293 | 0,246534901 |    |
| 916 | YIYGSFK        |                                                          | 0,637431974 | 0,09113053  |    |
| 917 | VTRSSAVRL      | vimentin                                                 | 1,799356061 | 0,014035653 | On |
| 918 | SRRLSQETG      | cystic fibrosis transmembrane conductance regulator      | 2,937909575 | 0,306574562 | On |
| 919 | PASPSPQRQ      | synapsins IA and IB                                      | 2,972157131 | 1,403193731 |    |
| 920 | PWRITDNEL      | bumetanide-sensitive sodium-(potassium)-chloride cotran: | 1,135582653 | 0,206103579 |    |
| 921 | STSVSAVAS      | muscarinic acetylcholine receptor M2                     | 0,966759981 | 0,080855537 |    |
| 922 | TRIPSAKKY      | astrocytic phosphoprotein PEA-15                         | 2,632377835 | 0,894578245 |    |
| 923 | PGGSTPVSS      | casein kinase II                                         | 1,644392592 | 0,126027839 | On |
| 924 | QGTLKIFK       | Myelin basic protein                                     | 1,059645074 | 0,171444053 |    |
| 925 | KKRLSVERI      | DNA topoisomerase II alpha                               | 1,133771108 | 0,085526728 |    |
| 926 | KYRKSSLKS      | spermatid nuclear transition protein 4                   | 1,106157037 | 0,215050841 |    |
| 927 | PLSRRLSVA      | glycogen synthase                                        | 0,618747929 | 0,020997203 |    |
| 928 | SRLHSVRER      | sucrose synthase 2                                       | 3,711791832 | 0,583049266 | On |
| 929 | KNDKSKTWQ      | eukaryotic translation initiation factor 4E              | 0,789388283 | 0,053213515 |    |
| 930 | LGGGTFDIS      | Heat Shock Protein 70                                    | 0,980078335 | 0,104305189 |    |
| 931 | QHLKSVMLQ      | Troponin I                                               | 0,526520549 | 0,050990105 |    |
| 932 | ISQESSEEE      | high mobility group protein                              | 2,31108883  | 0,843191733 |    |
| 933 | NGDASPAAA      | myristolated alanine-rich C-kinase substrate (MARCKS)    | 1,170743895 | 0,065043557 | On |
| 934 | EHVSSSEES      | Alpha-S2 casein                                          | 0,667081687 | 0,211903415 |    |
| 935 | ESMESYEVS      | Matrix Gla-protein                                       | 1,320475071 | 0,235098544 |    |
| 936 | KQLASFEIY      | Cystatin S                                               | 0,718420291 | 0,04715321  |    |
| 937 | NMPSSDDGL      | muscarinic acetylcholine receptor M2                     | 1,121814062 | 0,385914455 |    |
| 938 | PYKFPSSPLRIPGZ |                                                          | 1,137407287 | 0,463245217 |    |
| 939 | GSLKSRKRA      | spermatid nuclear transition protein 1                   | 1,712652786 | 0,179229685 | On |
| 940 | AVRRSDRAY      | Troponin I                                               | 1,129101668 | 0,088824421 |    |
| 941 | DPTMSKSKK      | eukaryotic translation initiation factor 2 beta          | 0,699476689 | 0,115902741 |    |
| 942 | GGGTSPVFP      | Desmin                                                   | 1,577990879 | 0,261349125 | On |
| 943 | GSTSTPAPS      | ATP-citrate (pro-S-) lyase                               | 0,609942451 | 0,107767938 |    |
| 944 | EGGRTVGAG      | Elongation factor Tu-A and B                             | 0,513528991 | 0,147778932 |    |
| 945 | ESHESLESY      | Matrix Gla-protein                                       | 1,375282547 | 0,301784071 |    |
| 946 | RVLESFRAA      | voltage-gated potassium channel                          | 2,224548553 | 0,170958147 | On |
| 947 | SMANSFVGT      | mitogen-activated protein kinase kinase 1                | 0,87046742  | 0,255560549 |    |
| 948 | RRPSPA         | pyruvate kinase                                          | 1,718071023 | 0,123666771 | On |
| 949 | ADSFSLNDA      | galectin-3                                               | 1,319999975 | 0,519844928 |    |
| 950 | ATSASPPQK      | p53                                                      | 0,695325622 | 0,205870259 |    |
| 951 | DNLYYWDQD      | Receptor tyrosine-protein kinase erbB-2                  | 1,685873871 | 0,208140625 | On |

|      |                |                                                 |             |             |    |
|------|----------------|-------------------------------------------------|-------------|-------------|----|
| 952  | GDSSYKNIH      | macrophage colony stimulating factor 1 receptor | 0,685557202 | 0,12779731  |    |
| 953  | RKRLSQDAY      | Neutrophil cytosol factor 6                     | 0,815118628 | 0,123852687 |    |
| 954  | ASGSFKL        | Histone H1.1                                    | 0,735204759 | 0,123348005 |    |
| 955  | LRRGSLG        | pyruvate kinase                                 | 0,900868589 | 0,0448735   |    |
| 956  | RRSVSEAAL      | hormone sensitive lipase                        | 0,921574818 | 0,093880226 |    |
| 957  | SLAMSPRQR      | Protein phosphatase inhibitor 5                 | 3,667814158 | 0,675090603 | On |
| 958  | RRASLG         |                                                 | 0,886224102 | 0,300366362 |    |
| 959  | AAVDTSEI       | Prothymosin                                     | 0,850739373 | 0,146252239 |    |
| 960  | TESQSLTLT      | Beta casein                                     | 0,778574498 | 0,171434933 |    |
| 961  | TTRVTPLRT      | Desmin                                          | 0,657654003 | 0,229624871 |    |
| 962  | WTADSGEGD      | Fibrinogen alpha                                | 2,759876486 | 0,511373095 | On |
| 963  | RHRDTGILD      | Myelin basic protein                            | 1,265724774 | 0,307468801 |    |
| 964  | NRIYTHQVV      | cell division protein kinase 7                  | 1,625602992 | 0,090758225 | On |
| 965  | LRKASLG        | pyruvate kinase                                 | 1,125928588 | 0,219246904 |    |
| 966  | YHGHSMSDP      | pyruvate dehydrogenase E1                       | 3,38677988  | 0,808103519 | On |
| 967  | SSEESIISQ      | Alpha-S2 casein                                 | 0,895093501 | 0,096948097 |    |
| 968  | PKRGSKGKD      | Myelin basic protein                            | 1,395946049 | 0,449441594 |    |
| 969  | LGSALRRR       | vimentin                                        | 1,322707984 | 0,482611681 |    |
| 970  | TDESDNEI       | lower matrix phosphoprotein                     | 0,596778792 | 0,052574383 |    |
| 971  | TRSVSSSSY      | vimentin                                        | 0,454259329 | 0,092454791 |    |
| 972  | PPRRSSIRN      | Neutrophil cytosol factor 7                     | 0,920566798 | 0,193623071 |    |
| 973  | RTKGSQSV       | phosphorylase b kinase beta                     | 1,624555078 | 0,161672513 | On |
| 974  | KRAASPRKS      | Histone H5                                      | 1,186083832 | 0,150924067 |    |
| 975  | LMAPSEEDH      | insulin-like growth factor binding protein 2    | 1,091630465 | 0,371419011 |    |
| 976  | QNPVYHNQP      | EGF Receptor                                    | 1,593640683 | 0,233349334 | On |
| 977  | SRSRSRSPG      | Lamin B receptor                                | 0,947226395 | 0,207550885 |    |
| 978  | KRKVSSAEG      | Nonhistone chromosomal protein HMG-14           | 1,13746326  | 0,356461084 |    |
| 979  | LQDDYEDMM      | Band 3 anion transport protein                  | 5,751724616 | 0,739420109 | On |
| 980  | QRRSSEGST      | Volt.-dep. L-type calcium channel alpha-1S      | 2,871918353 | 1,132927355 |    |
| 981  | GVLRRASVA      | pyruvate kinase                                 | 0,699988045 | 0,030655849 |    |
| 982  | KRPSLRAKA      | Myelin basic protein                            | 1,05283364  | 0,349475124 |    |
| 983  | EASTTVSKT      | Rhodopsin                                       | 0,670140132 | 0,156270582 |    |
| 984  | ELSNYIAMG      | Insulin receptor substrate 9                    | 1,27416411  | 0,352116771 |    |
| 985  | HHHATPSPP      | Myb proto-oncogene protein                      | 0,61751331  | 0,1516132   |    |
| 986  | KTETSQVAP      | Rhodopsin                                       | 0,687942759 | 0,051351116 |    |
| 987  | PYKFPSSPLRIPGZ |                                                 | 1,032536798 | 0,351388632 |    |
| 988  | GGSVTKKRK      | Lamin C                                         | 0,854353425 | 0,189769459 |    |
| 989  | AKRISGKMA      | cell division control protein 2                 | 0,87228819  | 0,162555103 |    |
| 990  | DDPSYVNVQ      | Adaptor molecule SHC                            | 2,778039419 | 0,553573051 | On |
| 991  | EVEKSPVKS      | neurofilament triplet M                         | 0,879551649 | 0,216966532 |    |
| 992  | GKSSSYSKQ      | Fibrinogen alpha                                | 0,796283547 | 0,014684886 |    |
| 993  | DSRSSLIRK      | multidrug resistance protein 3                  | 3,303494423 | 0,78194366  | On |
| 994  | EKAKSPVPK      | neurofilament triplet M                         | 0,64416817  | 0,118398192 |    |
| 995  | RQRKSRTTI      | Interleukin-2 receptor alpha                    | 0,879523648 | 0,025138885 |    |
| 996  | SAYATVKAY      | Annexin II                                      | 3,483994143 | 0,518056481 | On |
| 997  | NTDGSTDYG      | Lysozyme C                                      | 0,902905037 | 0,301117406 |    |
| 998  | KRTLRL         | EGF Receptor                                    | 0,907664859 | 0,191136516 |    |
| 999  | AGPTSARDG      | RNA polymerase alpha                            | 2,26023435  | 0,557962104 | On |
| 1000 | DAPDPELL       | Tyrosine-protein kinase Dash/Abl                | 0,641370349 | 0,128382477 |    |
| 1001 | ESSYSYEEI      | RNA polymerase alpha                            | 0,51611929  | 0,124570249 |    |
| 1002 | YSLGSALRP      | vimentin                                        | 1,107042708 | 0,127959942 |    |
| 1003 | SPHQSEDEE      | Glycogen [starch] synthase                      | 0,613686401 | 0,039026004 |    |
| 1004 | RKRRAE         | Histone H2B                                     | 3,185603059 | 0,279434561 | On |
| 1005 | RNASTNDSP      | Beta-2 adrenergic receptor                      | 1,23364008  | 0,406274178 |    |
| 1006 | SAELYSNAL      | platelet-derived growth factor receptor         | 0,932872126 | 0,194570597 |    |
| 1007 | NRQLSSGVS      | Heat Shock Protein 28                           | 1,37282269  | 0,160420186 | On |



|      |                |                                                           |             |             |    |
|------|----------------|-----------------------------------------------------------|-------------|-------------|----|
| 1008 | VGPDS          | p53                                                       | 0,402811274 | 0,104952471 |    |
| 1009 | SSSEGAPE       | Clathrin light chain B                                    | 1,659295028 | 0,107189934 | On |
| 1010 | TKHIYNLA       | Mast/stem cell growth factor receptor                     | 0,819768581 | 0,075039709 |    |
| 1011 | VDEMYREAP      | Myosin regulatory light chain 4                           | 0,790721133 | 0,099778508 |    |
| 1012 | YRKGSLKSR      | spermatid nuclear transition protein 1                    | 0,784363976 | 0,160193077 |    |
| 1013 | SNQEYLDLS      | Receptor tyrosine kinase                                  | 0,916437851 | 0,236083214 |    |
| 1014 | RKISASE        | cGMP-specific phosphodiesterase 3a                        | 1,807970585 | 0,802533728 |    |
| 1015 | VGFMEYVA       | mitogen-activated protein kinase 1                        | 5,630707876 | 0,083457965 | On |
| 1016 | QTASSPLSP      | Lamin                                                     | 1,033960247 | 0,213668033 |    |
| 1017 | LRKVKQEE       | vasodilator-stimulated phosphoprotein                     | 0,956472211 | 0,127156664 |    |
| 1018 | PQRATSNVF      | Myosin regulatory light chain 6                           | 3,574233103 | 0,880214864 | On |
| 1019 | SSNDSTSVS      | muscarinic acetylcholine receptor M2                      | 2,061524154 | 0,056081007 | On |
| 1020 | THVASVSDV      | acetyl-CoA carboxylase                                    | 0,862948214 | 0,206521592 |    |
| 1021 | LRLSTKYR       | protein-tyrosine phosphatase G1                           | 0,816115574 | 0,024750191 |    |
| 1022 | PRRDSTEGF      | fructose-1,6-bisphosphatase                               | 1,210293879 | 0,160547962 |    |
| 1023 | KAEEYILKK      | Acetylcholine receptor protein gamma                      | 1,329530198 | 0,33379039  |    |
| 1024 | KRPSFRAKA      | Myelin basic protein                                      | 1,045491223 | 0,382017178 |    |
| 1025 | PTPSAPSPQPKG   | Tyrosine 3-monooxygenase                                  | 1,588133287 | 0,569948877 |    |
| 1026 | QRYSSDPTG      | EGF Receptor                                              | 0,858262021 | 0,181343365 |    |
| 1027 | KEDTYTAHA      | Tyrosine-protein kinase abl-1                             | 0,726611171 | 0,109913644 |    |
| 1028 | KRRLSFSET      | Interleukin-1 alpha                                       | 0,988519085 | 0,135805403 |    |
| 1029 | KRAKAKTTKRR    | Myosin regulatory light chain 2                           | 1,479609261 | 0,159623071 | On |
| 1030 | HRQETVDAL      | calcium/calmodulin-dependent protein kinase type II alpha | 0,739126458 | 0,139003818 |    |
| 1031 | LNRMSFASN      | acetyl-CoA carboxylase                                    | 1,353510941 | 0,462906457 |    |
| 1032 | EEDTYTMPS      | Focal adhesion kinase                                     | 0,908013085 | 0,276858175 |    |
| 1033 | EQEYEDPD       | Band 3 anion transport protein                            | 5,644943802 | 1,028302453 | On |
| 1034 | HVSSSEESI      | Alpha-S2 casein                                           | 0,533001061 | 0,085252675 |    |
| 1035 | METPSQRRR      | Lamin C                                                   | 0,772604292 | 0,100711944 |    |
| 1036 | PYKFPSSPLRIPGZ |                                                           | 4,661553113 | 2,386828314 |    |
| 1037 | GNFNYVEFT      | Myosin regulatory light chain 2                           | 1,001570697 | 0,114385274 |    |
| 1038 | APRTPGGRR      | Myelin basic protein                                      | 0,708705708 | 0,161062215 |    |
| 1039 | DGNGYISAA      | Calmodulin                                                | 4,805958559 | 0,666388559 | On |
| 1040 | FLTEYVATR      | extracellular signal-regulated kinase 2                   | 0,825256912 | 0,074226137 |    |
| 1041 | GRALSTRAQ      | Troponin I                                                | 1,123102303 | 0,146390885 |    |
| 1042 | EDRMSLVNS      | Cystatin S                                                | 5,077857684 | 1,399743052 | On |
| 1043 | ENPEYLGLD      | Receptor tyrosine-protein kinase erbB-2                   | 1,158807719 | 0,355729694 |    |
| 1044 | RRLSSLRAS      | 40S ribosomal protein S6                                  | 1,144958002 | 0,063723126 | On |
| 1045 | SFKKSFKLS      | myristolated alanine-rich C-kinase substrate (MARCKS)     | 0,904423941 | 0,259069543 |    |
| 1046 | PSKKYAIKG      | Glutamyl aminopeptidase                                   | 1,220009421 | 0,19012573  |    |
| 1047 | RRPSV          | pyruvate kinase                                           | 1,043907612 | 0,087220646 |    |
| 1048 | APETPGGRR      | Myelin basic protein                                      | 2,62851089  | 0,539068537 | On |
| 1049 | DEEMSETAD      | Protein phosphatase inhibitor 2                           | 1,598303747 | 0,742774871 |    |
| 1050 | FFSSSESGA      | Clathrin light chain B                                    | 0,620761305 | 0,122396379 |    |
| 1051 | RDDTYTAHA      | Tyrosine-protein kinase Dash/Abl                          | 0,687516961 | 0,280127155 |    |
| 1052 | APTPGGRR       | Myelin basic protein                                      | 1,419861409 | 0,117022205 | On |
| 1053 | STNDSPL        | Beta-2 adrenergic receptor                                | 1,206707763 | 0,124208618 |    |
| 1054 | RRKASGPPV      | Histone H1.1                                              | 0,810798216 | 0,167502381 |    |
| 1055 | SEENSKKTV      | Alpha-S2 casein                                           | 2,141673021 | 0,835391955 |    |
| 1056 | PASPSPQRQ      | synapsins IA and IB                                       | 2,759608664 | 1,423516581 |    |
| 1057 | RRASR          | pyruvate kinase                                           | 0,649218705 | 0,200567892 |    |
| 1058 | STNEYMDMK      | Mast/stem cell growth factor receptor                     | 1,517831537 | 0,254436528 |    |
| 1059 | TPPLSPIDM      | Transcription factor AP-5                                 | 2,526439509 | 0,399880188 | On |
| 1060 | VKGATSDEE      | DNA topoisomerase II                                      | 2,096021605 | 0,302800154 | On |
| 1061 | QRATSNVFA      | Myosin regulatory light chain 5                           | 2,05629365  | 0,899749962 |    |
| 1062 | SPRKSPRKS      | Histone H6                                                | 1,91935858  | 0,57505707  |    |
| 1063 | RRRASVA        | pyruvate kinase                                           | 0,618308458 | 0,204083779 |    |



|      |                |                                                         |             |             |    |
|------|----------------|---------------------------------------------------------|-------------|-------------|----|
| 1064 | VTPSPPLGP      | casein kinase II                                        | 2,000005869 | 0,098463827 | On |
| 1065 | SRKDSLDDDS     | alpha-1B adrenergic receptor                            | 0,74830425  | 0,211633391 |    |
| 1066 | LSEHSSPEE      | Dopamine- and cAMP-regulated neuronal phosphoprotein    | 0,727252855 | 0,09602414  |    |
| 1067 | PSPKYPGPQ      | Chromogranin A                                          | 3,565784169 | 0,563605985 | On |
| 1068 | SSVLYTAVQ      | platelet-derived growth factor receptor                 | 1,468916196 | 0,473709385 |    |
| 1069 | TLSDSDDED      | N-myc proto-oncogene protein                            | 1,995190753 | 0,429853523 | On |
| 1070 | LSLDSQGRN      | Beta-2 adrenergic receptor                              | 0,706281891 | 0,195889664 |    |
| 1071 | PTKRSPQKG      | Histone H2B.1                                           | 1,150159308 | 0,287542266 |    |
| 1072 | KIQASFRGH      | neurogranin                                             | 0,670327133 | 0,095165757 |    |
| 1073 | KRSNSVDTS      | Glycogen [starch] synthase                              | 0,647393317 | 0,107913236 |    |
| 1074 | KRKQISGRGL     | Glycogen phosphorylase                                  | 1,236833212 | 0,17078219  |    |
| 1075 | SQESSEEEQ      | high mobility group protein                             | 0,803800566 | 0,163849277 |    |
| 1076 | KKDVTVPKA      | Histone H1                                              | 0,776886223 | 0,095193093 |    |
| 1077 | KSRWSGSQQ      | RAF proto-oncogene ser/thr-protein kinase               | 0,91164164  | 0,209681361 |    |
| 1078 | LYSGSEGDS      | Serum response factor                                   | 1,442526964 | 0,26035617  |    |
| 1079 | IGHHSTSD       | 2-oxoisovalerate dehydrogenase alpha                    | 0,845233769 | 0,34201999  |    |
| 1080 | MPGETPPLS      | Transcription factor AP-3                               | 0,797009963 | 0,248262637 |    |
| 1081 | EETVYEAEP      | Hematopoietic cell-specific LYN substrate               | 1,841039853 | 0,450134558 |    |
| 1082 | ERRNSILTE      | cystic fibrosis transmembrane conductance regulator     | 0,903171177 | 0,063653299 |    |
| 1083 | INETSQHHD      | vimentin                                                | 0,653242691 | 0,091658317 |    |
| 1084 | NDSNYVVKG      | Mast/stem cell growth factor receptor                   | 0,784676149 | 0,072618296 |    |
| 1085 | PYKFPSSPLRIPGZ |                                                         | 1,079895103 | 0,153282018 |    |
| 1086 | GRNASTNDS      | Beta-2 adrenergic receptor                              | 1,007131056 | 0,228722088 |    |
| 1087 | ARSGSSTYS      | parathyroid hormone/parathyroid hormone-related peptide | 0,863030182 | 0,157996309 |    |
| 1088 | DLTSPDVG       | Transcription factor AP-4                               | 0,808506005 | 0,128709494 |    |
| 1089 | GAGNSLRTA      | Lamin C                                                 | 1,318519889 | 0,143496569 | On |
| 1090 | GRTWTLAGT      | cGMP-dependent protein kinase (PKG)                     | 2,071607515 | 0,807117928 |    |
| 1091 | EEHVYSFPN      | Paxillin                                                | 1,023198858 | 0,222773818 |    |
| 1092 | ERHHSIDAQ      | phosphoenolpyruvate carboxylase                         | 2,105577921 | 0,798542726 |    |
| 1093 | RRRRAASVA      | pyruvate kinase                                         | 2,927355947 | 0,74963676  | On |
| 1094 | SIRDTPAKN      | Nucleophosmin                                           | 1,115317359 | 0,254498771 |    |
| 1095 | GGYSLG         | Lysozyme C                                              | 0,712910202 | 0,107336715 |    |
| 1096 | AAASFKAKK      |                                                         | 1,202747946 | 0,044608321 | On |
| 1097 | ARDIYKNDY      | Ros proto-oncogene tyrosine kinase                      | 0,883576859 | 0,182761719 |    |
| 1098 | DKEVSDDEA      | HSP90-alpha                                             | 0,512534981 | 0,116076716 |    |
| 1099 | FRKFTKSER      | cGMP-dependent protein kinase (PKG)                     | 1,538226748 | 0,200605931 | On |
| 1100 | RFFGSDRGA      | Myelin basic protein                                    | 2,303441886 | 0,45381148  | On |
| 1101 | PRTPGGRR       | Myelin basic protein                                    | 2,719029378 | 0,474103343 | On |
| 1102 | KRRVSEV        | Erythrodihydroneopterin triphosphate synthetase         | 0,834959565 | 0,098118255 |    |
| 1103 | RRRGSSIPQ      | 6-phosphofructo-2-kinase/fructose-2,6-bisphosphatase    | 0,928577821 | 0,265413783 |    |
| 1104 | SGDTSRPHL      | Microtubule-associated protein tau                      | 1,005100683 | 0,187926523 |    |
| 1105 | KQITVR         | Glycogen phosphorylase                                  | 0,787529176 | 0,107555567 |    |
| 1106 | SSKRA          | Myosin regulatory light chain 2                         | 0,86542342  | 0,244590118 |    |
| 1107 | SVSSSSYRR      | vimentin                                                | 1,422253623 | 0,069687833 | On |
| 1108 | TRQASISGP      | synapsins                                               | 0,50211314  | 0,096663082 |    |
| 1109 | VRTYTHEVV      | Cell division protein kinase 2                          | 1,371503774 | 0,29175949  |    |
| 1110 | REILSRRPS      | cAMP response element binding protein                   | 3,159263497 | 0,454378461 | On |
| 1111 | GASGSFKL       | Histone H1.1                                            | 1,227895942 | 0,405093885 |    |
| 1112 | VRRSDRA        | Troponin I                                              | 1,517102354 | 0,104359944 | On |
| 1113 | VTRRTLSDM      | 6-phosphofructokinase                                   | 2,855626688 | 0,785579348 | On |
| 1114 | SRRGSESE       | phosphoprotein phosphatase 1, 3a                        | 0,961561753 | 0,15594655  |    |
| 1115 | PASAYGSVK      | Annexin II                                              | 0,955710471 | 0,398927384 |    |
| 1116 | PWQVSLRTR      | Plasminogen                                             | 1,206383966 | 0,151961827 |    |
| 1117 | STSRSLYSS      | vimentin                                                | 1,994828058 | 0,105530911 | On |
| 1118 | TRGGSLERS      | alpha-1B adrenergic receptor                            | 2,819758849 | 1,002015004 |    |
| 1119 | PFKLSGLSF      | MARCKS-related protein                                  | 0,688644009 | 0,07915094  |    |

|      |                |                                                       |             |             |    |
|------|----------------|-------------------------------------------------------|-------------|-------------|----|
| 1120 | QEQEYVQAV      | Annexin I                                             | 0,860861221 | 0,07723299  |    |
| 1121 | KKRFSFKKS      | myristolated alanine-rich C-kinase substrate (MARCKS) | 1,205926062 | 0,289863312 |    |
| 1122 | KYLASASTM      | Myelin basic protein                                  | 2,547404251 | 0,712164104 | On |
| 1123 | PRRVSRRRR      | Protamine YII                                         | 1,826448046 | 0,198838899 | On |
| 1124 | SRKRSGEAT      | 6-phosphofructokinase                                 | 0,474067758 | 0,042267291 |    |
| 1125 | KMKDTSSEE      | Calmodulin                                            | 0,733220648 | 0,092317088 |    |
| 1126 | LFRLSEHSS      | Dopamine- and cAMP-regulated neuronal phosphoprotein  | 0,734213141 | 0,161786288 |    |
| 1127 | QDENTVSTS      | muscarinic acetylcholine receptor M2                  | 4,073892108 | 0,185463115 | On |
| 1128 | ISITSRKAQ      | GTP-binding protein era                               | 0,778732408 | 0,12579401  |    |
| 1129 | NFLKTSAGS      | Carbon catabolite derepressing protein kinase         | 2,011191553 | 0,810301851 |    |
| 1130 | EHIPYTHMN      | Insulin Receptor (IR)                                 | 1,188253198 | 0,417304546 |    |
| 1131 | ESMESYELN      | Matrix Gla-protein                                    | 1,061471286 | 0,365122427 |    |
| 1132 | KKRFSFKKS      | myristolated alanine-rich C-kinase substrate (MARCKS) | 1,407313874 | 0,173638658 | On |
| 1133 | NKQGYKARQ      | Protein kinase C delta                                | 0,915510927 | 0,14574694  |    |
| 1134 | PYKFPSSPLRIPGZ |                                                       | 2,719872152 | 0,359974237 | On |
| 1135 | GSQTSSRPS      | vimentin                                              | 2,220903277 | 1,198861512 |    |
| 1136 | AVMVSHYIH      | Prolactin                                             | 1,414419007 | 0,148788533 | On |
| 1137 | DPPGTESFV      | Beta-2 adrenergic receptor                            | 0,989581631 | 0,214268863 |    |
| 1138 | GFKRSYEEH      | Insulin Receptor (IR)                                 | 0,622004771 | 0,105009914 |    |
| 1139 | GSRRRRRRY      | protamine                                             | 0,975048887 | 0,064655206 |    |
| 1140 | EFPLSPPKK      | stathmin                                              | 0,731616155 | 0,130460206 |    |
| 1141 | ESEKTKTKE      | myosin II heavy chain                                 | 2,79458968  | 0,860390475 | On |
| 1142 | RSSMSGLHL      | acetyl-CoA carboxylase                                | 1,193552536 | 0,215112628 |    |
| 1143 | SLVNSRAQE      | Cystatin S                                            | 2,585160389 | 0,936326184 |    |
| 1144 | RRATVA         | pyruvate kinase                                       | 2,415408996 | 0,972209824 |    |
| 1145 | ADSFSLHDA      | galectin-3                                            | 3,546587089 | 0,94233152  | On |
| 1146 | ATRRSYVSS      | glial fibrillary acidic protein                       | 2,724844817 | 0,453677608 | On |
| 1147 | DNIDSQGRN      | Beta-2 adrenergic receptor                            | 1,265211791 | 0,417846302 |    |
| 1148 | GDSSEGESE      | Serum response factor                                 | 0,904671778 | 0,091762952 |    |
| 1149 | RKRKSSQAL      | Thyroid hormone receptor alpha                        | 0,775219915 | 0,097849413 |    |
| 1150 | AKRSRKE        | Histone H2B                                           | 1,144361215 | 0,130440248 |    |
| 1151 | LRRATLG        | pyruvate kinase                                       | 1,485520288 | 0,317465789 |    |
| 1152 | RRSSSVGYI      | Acetylcholine receptor protein delta                  | 4,649606225 | 0,784541441 | On |
| 1153 | SKVTSKAGS      |                                                       | 4,598531792 | 0,995102126 | On |
| 1154 | RGYSLG         | Lysozyme C                                            | 2,568120654 | 0,311134016 | On |
| 1155 | AARTPGGRR      | Myelin basic protein                                  | 0,683725953 | 0,107873609 |    |
| 1156 | TEPQYQPGE      | Proto-oncogene tyrosine-protein kinase Fyn            | 1,250243511 | 0,254527372 |    |
| 1157 | TTRRSASKT      | Fibrinogen alpha                                      | 0,786092386 | 0,234246877 |    |
| 1158 | WLTKTPEGN      | Actin and myosin binding protein                      | 1,771826457 | 0,641753439 |    |
| 1159 | RGRSSVYSA      | myosin heavy chain                                    | 1,356036865 | 0,577102589 |    |
| 1160 | RKRTLRRRL      | EGF Receptor                                          | 0,876805569 | 0,168450286 |    |
| 1161 | LRHASLG        | pyruvate kinase                                       | 0,663960169 | 0,081912569 |    |
| 1162 | YNGYSSNS       | Beta-2 adrenergic receptor                            | 4,74226037  | 1,158136597 | On |
| 1163 | SRTPSLPTP      | Microtubule-associated protein tau                    | 1,716085672 | 0,384048104 |    |
| 1164 | PKKGSKKAV      | Histone H2B                                           | 0,883554842 | 0,137720936 |    |
| 1165 | LELSDDDD       | Myosin heavy chain, nonmuscle type B                  | 3,83187988  | 0,316650477 | On |
| 1166 | TDDGYMPMS      | Insulin receptor substrate 10                         | 1,006429684 | 0,176859893 |    |
| 1167 | TRRLTGFLP      | Glycogen phosphorylase                                | 0,945301731 | 0,299148534 |    |
| 1168 | PPEKTEEEE      | somatostatin receptor type 5                          | 1,859445012 | 0,474862529 |    |
| 1169 | RTGRSGSV       | phosphorylase b kinase beta                           | 1,096388823 | 0,136801576 |    |
| 1170 | KQSPSSSPT      | phosphorylcholine transferase                         | 0,798969323 | 0,041709591 |    |
| 1171 | LLRPSRRVR      | somatostatin receptor type 6                          | 0,944597486 | 0,230587603 |    |
| 1172 | QMALTPVVV      | cell division protein kinase 4                        | 0,802005118 | 0,066165092 |    |
| 1173 | SRSRSPGRP      | Lamin B receptor                                      | 1,032694491 | 0,122061153 |    |
| 1174 | KRKRSRKES      | Histone H2B                                           | 1,408680268 | 0,044073353 | On |
| 1175 | LQAISPKQS      | phosphorylcholine transferase                         | 0,854362166 | 0,257811895 |    |

1176

QRRRSLEPP

Proto-oncogene tyrosine-protein kinase Src

0,63894792

0,095547967

**Suppl. Table 8. Phosphobase annotation of kinases upstream of peptides.**

| Peptide # | Sequence       | Phosphobase-annotation of upstream kinase |
|-----------|----------------|-------------------------------------------|
| 1         | HEIYVDPM       | PDGFR                                     |
| 2         | KRPSVRAKA      | PKA,PKC                                   |
| 3         | EDNEYTARQ      | Src                                       |
| 4         | ENKLYGMSD      | Ret                                       |
| 5         | HRLLTLDPV      | PKC                                       |
| 6         | LEKKYVRRD      | CSF-R,Fms                                 |
| 7         | PYKFPSSPLRIPGZ | na                                        |
| 8         | GKRQTEREK      | PKC                                       |
| 9         | APATSPKAE      | CKII                                      |
| 10        | DEESEQGA       | CKII                                      |
| 11        | FFRRSKIIV      | PKC                                       |
| 12        | GMTEYVATR      | STE7,STE11                                |
| 13        | EAALYKNLL      | Kit                                       |
| 14        | ELILSPRSK      | MAPK                                      |
| 15        | RRAVSEQDA      | CaM-II                                    |
| 16        | SEDNSEDEI      | CKII                                      |
| 17        | PASLSRAKA      | GSK3                                      |
| 18        | RRASL          | PKA                                       |
| 19        | AKKMSTYNV      | MHCK                                      |
| 20        | DDINSYEA       |                                           |
| 21        | ETRFTDTRK      | CaM-III                                   |
| 22        | QLSTSEENS      | CKI                                       |
| 23        | SPRKSPKKS      | sperm-specific histone kinase             |
| 24        | RRKASGP        | PKA                                       |
| 25        | RQLRSPRRT      | CDK                                       |
| 26        | SAVASNMRD      | GRK                                       |
| 27        | RTPPPSG        | PKC                                       |
| 28        | LRRAS          | PKA                                       |
| 29        | SSTGSIDMV      | GSK3                                      |
| 30        | TLASSFKRR      | PKC                                       |
| 31        | VGAFSTVKG      | RK                                        |
| 32        | YSGHMSMDP      | PDK                                       |
| 33        | SPGEYVNIE      | IR                                        |
| 34        | RKRSAKE        | PKA,PKG                                   |
| 35        | VINETSQHH      | p37                                       |
| 36        | SPVVSGDTS      | CDK,GSK3,CaMK                             |
| 37        | LRRFSLATM      | PKA                                       |
| 38        | PRPASVPPS      | DYRK                                      |
| 39        | SSRPSSNRS      | PKA,PKC                                   |
| 40        | TKFASDDEH      | CKII                                      |
| 41        | LSDDSFIED      | CKII                                      |
| 42        | PSPKTTPGS      | MAPK, JNK, GSK3                           |
| 43        | KDIGSESTE      | CKII                                      |
| 44        | KRRGSVPIL      | PKA                                       |
| 45        | KRAKAKTAKKR    | PKC                                       |
| 46        | QSYSSQRV       | CDK                                       |
| 47        | KGTGYIKTE      | JAK1,JAK2,EGFR                            |
| 48        | KRSLSEMEI      | S6K                                       |
| 49        | KRKQGSVRGL     | PhK,PKA                                   |
| 50        | HTRDSEAQR      | PKA                                       |
| 51        | MAEVSWKVL      | KPBB                                      |
| 52        | EEGISQESS      | CKII                                      |
| 53        | EQQTTEDEL      | CKII                                      |
| 54        | IGEGTYGVV      | WEE1,MYT1                                 |
| 55        | MMPYVVTR       | MKK4                                      |

|     |                |                     |
|-----|----------------|---------------------|
| 56  | PYKFPSSPLRIPGZ | na                  |
| 57  | GQEVYVKKT      | TEK                 |
| 58  | AQETSGEEI      | CKII                |
| 59  | DKAKSRPSL      | PKA                 |
| 60  | FPVSYSSSG      | Ret                 |
| 61  | GRLSSMAMI      | CaM-II              |
| 62  | EEDLSDENI      | CKII                |
| 63  | EPGPYAQPS      | IGF1R,Abl,EGF-R     |
| 64  | RRRASQLKV      | PKA,PKC             |
| 65  | SGADYPDEL      |                     |
| 66  | KQISVR         | PK                  |
| 67  | SLKDH          | PKC                 |
| 68  | APRTAGGRR      | MAPK                |
| 69  | DGHEYIYVD      | PDGFR               |
| 70  | FKRSYEEHI      | IR                  |
| 71  | REARSRAST      | GSK3                |
| 72  | DRVYVHPF       | EGF,Src,IR          |
| 73  | VRRSDAA        | PKA                 |
| 74  | RRKMSRGLP      | PKA                 |
| 75  | SEVPYREVQ      | JNK2                |
| 76  | PRRASATSS      | CKI                 |
| 77  | RRLSI          | AMP-PK,PKA          |
| 78  | STSLSPFYL      | MAPK                |
| 79  | TRDIYETDY      | IR                  |
| 80  | VPTLSTFRT      | PKC                 |
| 81  | RASTKSSES      | S6K                 |
| 82  | SPSSSPTHE      | proline-rich kinase |
| 83  | STNDSL         | GRK5                |
| 84  | VRTFTHEVV      | CDK                 |
| 85  | SRKMSVQEY      | PKA                 |
| 86  | LSGLSFKRN      | PKC                 |
| 87  | PTGTTQQRK      | CDK                 |
| 88  | STLASSFKR      | PKC                 |
| 89  | TPPKSPSSA      | MAPK,GSK3,CKD       |
| 90  | PAAVSEHGD      | PKC                 |
| 91  | PVSPSLVQG      | GRK                 |
| 92  | KKDASDDL       | CKII                |
| 93  | KSRPSLPLP      | PKA                 |
| 94  | LSVSSLPGL      | CKI                 |
| 95  | SRHSSPHQS      | GSK3, CKII          |
| 96  | KKPPTPPPE      |                     |
| 97  | KVPQTPLHT      | MAPK                |
| 98  | PRRSSIRNA      | PKC?                |
| 99  | ILDTTGQEE      | Ras                 |
| 100 | NDSNYIVKG      | Fms                 |
| 101 | EFLRTSAGS      | AMP-PK              |
| 102 | ERTNSLPPV      | PKA                 |
| 103 | IRRASTIEM      | PKA,CaM-II          |
| 104 | NFDDYMKSL      | IR                  |
| 105 | PYKFPSSPLRIPGZ | na                  |
| 106 | GRTGRRNSI      | PKA                 |
| 107 | ATPIYLDIL      | TrkC                |
| 108 | DMRQTVAVG      | PKC                 |
| 109 | GDRFTDEEV      | CKII                |
| 110 | GSGSSVTSR      | PKA,PKC             |
| 111 | EEPQYEEIP      | Src                 |



|     |                |                                               |
|-----|----------------|-----------------------------------------------|
| 112 | ERRLSLVPD      | PKA,PKG                                       |
| 113 | RRSSSRPIR      | PKA,PKC                                       |
| 114 | SKIGSTENL      | CaMKII,CK,GSK3,PKA,PKC,P110K,PK,A-Kinase,MARK |
| 115 | NDMTSL         | Tropomyosin specific kinase                   |
| 116 | AARLSLTDP      | PKA                                           |
| 117 | ARRSTTDAG      | PKA                                           |
| 118 | DLKDTKYKL      | MHCK                                          |
| 119 | GAFSTVKGV      | RK                                            |
| 120 | RGRASSHSS      | PKC                                           |
| 121 | RKRSRAEF       | PKA                                           |
| 122 | LRAASLG        | PKA                                           |
| 123 | RRRQSVLNL      | PKA,PKG                                       |
| 124 | SIDEYFSEQ      | Tyk2                                          |
| 125 | EESESD         | CKII                                          |
| 126 | RRRS           | PKA                                           |
| 127 | TAYGTRRHL      | PKC                                           |
| 128 | TRRISQTSQ      | CaM-II                                        |
| 129 | VTPRTPPPS      | MAPK                                          |
| 130 | REVSSLKSK      | PKC                                           |
| 131 | PEETQTQD       | ds-DNA                                        |
| 132 | KKQISVR        | PhK,PKA                                       |
| 133 | WLTKSPDGN      | CDK                                           |
| 134 | SRRSSLGSL      | PKA                                           |
| 135 | PETVYEVAG      | Src                                           |
| 136 | QEPGSGPPE      | cAMP?                                         |
| 137 | SVSSSPIKE      | CDK                                           |
| 138 | TRLHSLRER      |                                               |
| 139 | PKEVYDVML      | TrkC                                          |
| 140 | PRTPGGRR       | MAPK                                          |
| 141 | KLSPSPSSR      | CDK                                           |
| 142 | LEKKYVRRD      | CSF-R,Fms                                     |
| 143 | QASSTPLSP      | CDK                                           |
| 144 | SRRDSLFP       | PKA                                           |
| 145 | KQPIYIVME      | Fps/Fes                                       |
| 146 | LLQDSVDFS      | CaM-II                                        |
| 147 | QLSTSEENS      | CKI                                           |
| 148 | KIQASFRGH      | PKC                                           |
| 149 | NKGASQAGM      | PKC, CaM-II                                   |
| 150 | EIVESLSSS      | CK1                                           |
| 151 | ESSNYMAPY      | PDGFR                                         |
| 152 | KRPSKRAKA      | PKC                                           |
| 153 | NRAITARRQ      | PK                                            |
| 154 | PYKFPSSPLRIPGZ | na                                            |
| 155 | GSRPSESNG      | PKA                                           |
| 156 | DAHKSKRQH      | CKII                                          |
| 157 | DSLIIYDDGL     | Ret                                           |
| 158 | GGRDSRSGS      | PKA,PKC                                       |
| 159 | GVERSVRPT      | PK                                            |
| 160 | EGVKSQAE       | Erk1,2                                        |
| 161 | ESLSSSEES      | CKI                                           |
| 162 | RVRMSADAM      | PKA                                           |
| 163 | SNPTYSVMR      | Src                                           |
| 164 | SSKRAK         | PKC                                           |
| 165 | AGDGSDEEV      | PKC                                           |
| 166 | AVDRYIAIT      | IR                                            |
| 167 | DPLLYRFP       | PKC                                           |

|     |                |                     |
|-----|----------------|---------------------|
| 168 | GENIYIRHS      | EGFR                |
| 169 | RLSPSPTSQ      | CDK                 |
| 170 | RKESYSV        | PKA                 |
| 171 | PLSRTL         | CKI                 |
| 172 | RSRASTPPA      | GSK3                |
| 173 | SLSSSEESI      | CKI                 |
| 174 | LRRASLAG       | PKA                 |
| 175 | ADSESEDEE      | CKII                |
| 176 | THERSPSPS      | proline-rich kinase |
| 177 | TVTRSYRSV      | PKC                 |
| 178 | YETDYRKG       | IR                  |
| 179 | RKQISVRGL      | PK                  |
| 180 | AGTTYAL        | MHCK                |
| 181 | LRRASVA        | PKC                 |
| 182 | YRGYSLGNW      | PKA                 |
| 183 | SSLKSRKRA      |                     |
| 184 | PMRRSVSEA      | PKA                 |
| 185 | RSKRSGSV       | PKA                 |
| 186 | TEGQYQQQP      | CSK                 |
| 187 | TTPLSPTRL      | CDK                 |
| 188 | PQPEYVNQP      | erbB2               |
| 189 | VKRGISGL       | H4-PK-I,PKA         |
| 190 | KRKQISVRG      | PK                  |
| 191 | LPVPSTHIG      | PKG                 |
| 192 | QRRHSLEPP      | PKA                 |
| 193 | SRTLVSSSL      | AMP-PK,CKI,PKA,PK   |
| 194 | KRPSEKA        | PKC                 |
| 195 | LRGRSFMNN      | PKA                 |
| 196 | QRVSSYRRT      | PKC                 |
| 197 | HDLSEMFFN      |                     |
| 198 | KRPSRAKA       | PKC                 |
| 199 | EDNEYTARP      | Src                 |
| 200 | ENAPSSTSS      | CKII                |
| 201 | HMRSSMSGL      | PKA                 |
| 202 | LDRSSHAQR      | IR                  |
| 203 | PYKFPSSPLRIPGZ | na                  |
| 204 | GKEIYNTIR      | PDGFR,EGFR          |
| 205 | APATPGGRR      | MAPK                |
| 206 | DEEESEEA       | CKII                |
| 207 | FFKKSIST       | PKA                 |
| 208 | GMGTSVERA      | PDK                 |
| 209 | DYDSSDIED      | CKII                |
| 210 | EKRASGQAF      | PKA                 |
| 211 | RRAVSELDA      | CaM-II              |
| 212 | SDGGYMDMS      | PDGFR               |
| 213 | NWHMTPPRK      | CDK                 |
| 214 | RRASI          | PKA,PKC             |
| 215 | AKKGSEQES      |                     |
| 216 | DDEMTGYVA      | MKK3,MKK6           |
| 217 | ETDYRKG        | IR                  |
| 218 | YVTTSTRTY      | PKC                 |
| 219 | SPQPSRRGS      | PKA,GSK3            |
| 220 | RRAASVA        | PKA,PKC             |
| 221 | RPSENGQP       | PKA                 |
| 222 | SASTTPVKK      |                     |
| 223 | NSYGSRRG       | PKC                 |

|     |                |                |
|-----|----------------|----------------|
| 224 | LRRASL         | PKA            |
| 225 | SSTDSADSG      |                |
| 226 | TKSGSTTKN      | MNK1           |
| 227 | VETTYADFI      | EGFR           |
| 228 | YSFTTTAER      | AFK            |
| 229 | SPFKYQSLL      | IR             |
| 230 | RKRSAAE        | PKA,PKG        |
| 231 | VIKRSRKR       | CDK            |
| 232 | SPVKSPEAK      |                |
| 233 | LRRASVAQL      | PKC            |
| 234 | PRMPSLVVP      | PKA            |
| 235 | SSPVYQDAV      | Src            |
| 236 | TKDLYDALH      |                |
| 237 | LRSPSWEPF      | PKA,PKC        |
| 238 | PSLTPPTR       |                |
| 239 | KASASPRRK      | sperm-specific |
| 240 | KRRDYDLA       |                |
| 241 | PAPAVRASDRA    |                |
| 242 | QSRASDKQT      | PKC            |
| 243 | KGQESFKKQ      | PKC            |
| 244 | KRSGSVYEP      | PKA            |
| 245 | KRAQISVRGL     | PK             |
| 246 | HSSSQGGG       | PKA,PKC        |
| 247 | MAEAYSEIG      | Lck/Fyn        |
| 248 | EEESSYSYE      |                |
| 249 | EQPGSDEED      | CKII           |
| 250 | IEQFSTVKG      | GRK5           |
| 251 | MLDHSESTK      |                |
| 252 | PYKFPSSPLRIPGZ | na             |
| 253 | GPRTTAQQ       | PKG,PKC        |
| 254 | AQDTYLVLVD     | Lyn,JAK2       |
| 255 | DIPESQMEE      | CK,CKII        |
| 256 | FPRASFGSR      | PKA            |
| 257 | GRKASGSSP      | PAK2, CaM-II   |
| 258 | EDVGSDEEE      | CKII           |
| 259 | EPAVSPLL       | CDK            |
| 260 | RRRASQLKI      | PKC            |
| 261 | SFTTTAERE      | AFK            |
| 262 | PLSRTL         | CKI            |
| 263 | SGRGK          | H4-PK-II       |
| 264 | APRSPGGRR      | MAPK           |
| 265 | DGERYDEDE      |                |
| 266 | FKRPTLRRV      | PKC            |
| 267 | REAEYEPET      | Src            |
| 268 | DRVYIHPF       | EGF,Src,IR     |
| 269 | VRRISGL        | H4-PK-I,PKA    |
| 270 | RRKGTDVNV      | PKA            |
| 271 | SETKTEEEE      | CKII           |
| 272 | PQRATSNVF      | MLCK           |
| 273 | RRGSV          | PKA            |
| 274 | STSKSESSQ      | S6K            |
| 275 | TRAPSRTAS      | MFPK           |
| 276 | VPRTPGGRR      | MAPK           |
| 277 | RASSRSVR       | PKC            |
| 278 | SPSSPASL       |                |
| 279 | RVYVHPF        |                |

|     |                |                    |
|-----|----------------|--------------------|
| 280 | VRRVSDDDR      | PKA                |
| 281 | SRKMSIQEY      | PKA                |
| 282 | LSGFSEFKS      | PKC                |
| 283 | PSSTSSSSI      | CKII               |
| 284 | STGIYEAL       | Src                |
| 285 | TPPKSPSAS      |                    |
| 286 | LYSSSPGGA      | CDK                |
| 287 | PVPKSPVEE      |                    |
| 288 | KKASFKAKK      | PKC                |
| 289 | KSPAKTPEK      | CDK                |
| 290 | PLSKTLSVSS     | AMP-PK,CKI,PKA,PK  |
| 291 | SRGKSSSYS      | PKC                |
| 292 | KKLGSKKPQ      | PKC                |
| 293 | KTASTRKY       | PKC                |
| 294 | PRRRTTRAS      | PKA                |
| 295 | IHQRSRRL       | PKC                |
| 296 | NDALSGSGN      | CKI                |
| 297 | EETQTQDQP      | ds-DNA             |
| 298 | ERSQSRKDS      | PKC                |
| 299 | IRQASQAGP      | CaM-II             |
| 300 | NFDDYMKEV      | IR                 |
| 301 | PYKFPSSPLRIPGZ | na                 |
| 302 | GRRQSLIQD      | CaM-II             |
| 303 | ASFEYTILD      | JAK2               |
| 304 | DLSTYASIN      | IR                 |
| 305 | GDNDYIPL       | PDGFR              |
| 306 | GSESTEDQA      | CKII               |
| 307 | EENVSVDDT      | CKII               |
| 308 | ERRKSKSGA      | PKA                |
| 309 | RRSRRSRS       | RS                 |
| 310 | SKIGSLDNI      | PKA,GSK3           |
| 311 | NDITSL         | tropomyosin kinase |
| 312 | AARGSFDA       | RK                 |
| 313 | ARNDSVTVA      | PKA                |
| 314 | DLFGSDEED      | CKII               |
| 315 | FSSRSYTS       |                    |
| 316 | RGKSSSYSK      | PKC                |
| 317 | RKRSRAEA       | PKA,PKG            |
| 318 | LKRASLG        | PKA,H4-PK          |
| 319 | RRRPTPATL      | PKA                |
| 320 | SIADTFVGT      |                    |
| 321 | LRRNSI         | PKA                |
| 322 | RRRRASVA       | PKA,PKC,PK         |
| 323 | TATDYHTTS      | CK,CKII            |
| 324 | TRRASRPVR      | PKA                |
| 325 | VSSSYRRM       | PKC                |
| 326 | REVSSLKNK      | PKC                |
| 327 | LSYRRYSL       |                    |
| 328 | KKKASVA        |                    |
| 329 | WKRTSMKLL      | PKA                |
| 330 | SRRQSVLVK      | PKA                |
| 331 | PENDYEDVE      |                    |
| 332 | QEGLYNELQ      | Lck/Fyn            |
| 333 | SVPPSPSLS      |                    |
| 334 | TRKVSLAPQ      | PKA,PKG            |
| 335 | PKDPSQRRR      | PKC                |

|     |                |                    |
|-----|----------------|--------------------|
| 336 | KRKQISVR       | PK                 |
| 337 | KLRRSSSVG      | PKA,PKC            |
| 338 | LDPLSEPED      | CKII               |
| 339 | QAGMTAPGT      |                    |
| 340 | SRRASRPVR      | PKA,PKC            |
| 341 | KPGFSPQPS      | GSK3               |
| 342 | LLPMSPEEF      | KIT,S6K,CaMKII,PKC |
| 343 | QLNDSSEEE      | CKII               |
| 344 | KGGSYSQAA      |                    |
| 345 | NIYISPLKS      | CDK                |
| 346 | EIRVSINEK      | PKA                |
| 347 | ESRISLPLP      | vimentin           |
| 348 | KRPSIRAKA      | PKC                |
| 349 | NPGFYVEAN      | EGFR               |
| 350 | PYKFPSSPLRIPGZ | na                 |
| 351 | GSRGSGSSV      | PKA                |
| 352 | DAGASPVEK      | PKC                |
| 353 | DRRVSAAE       | PKA                |
| 354 | GGRADYKS       | PKA,PKC            |
| 355 | GVDTYVEMR      | CSF1R              |
| 356 | EGTHSTKRG      | PKC                |
| 357 | ESLESYEIN      |                    |
| 358 | RVRKTKGKY      | PKC                |
| 359 | SNPEYLSAS      | IR                 |
| 360 | RRSTVA         | PKC                |
| 361 | AEPGSPTAA      |                    |
| 362 | AVDGYVKPQ      | Lyn,Src,JAK2       |
| 363 | DPGVSYRTR      | PDK                |
| 364 | GEINTEDD       | CKII               |
| 365 | RLSISTESQ      | AMP-PK             |
| 366 | RKEISVR        | PKA,PhK            |
| 367 | PGSPQKR        | sperm-specific     |
| 368 | RSGYSSPGS      |                    |
| 369 | SLRASTSKS      | S6K                |
| 370 | VRKISGL        | H4-PK-I,PKA        |
| 371 | ADGVYAASG      | Fes                |
| 372 | TGFLTEYVA      |                    |
| 373 | TVSTSLGHS      | GRK                |
| 374 | YDKEYYSVH      | Met                |
| 375 | RKLSQGTR       |                    |
| 376 | NRKPSKDKD      | PKC                |
| 377 | LRRASPG        | PKA,H4-PK          |
| 378 | YMAPYDNYV      | PDGFR              |
| 379 | SSKAYNGY       | IR                 |
| 380 | PLTPSGEAP      | Src                |
| 381 | RRRRPTPA       |                    |
| 382 | TEGQYQPQP      | CSK                |
| 383 | TSSSIFDI       | CKII               |
| 384 | PPSPLSRH       |                    |
| 385 | SSKRAKAK       | PKC                |
| 386 | KRKNSILNP      | PKA,PKG            |
| 387 | LNRMSFASN      | AMP-PK,PKA         |
| 388 | QRHGSKYLA      | PKA,PKC            |
| 389 | SRTASFSES      | PKA                |
| 390 | KRPSDRAKA      | PKC                |
| 391 | LRGPSWDPF      | MAPKAPK2           |

|     |                |                |
|-----|----------------|----------------|
| 392 | QRSTSTPNV      | AMP-PK,PKB     |
| 393 | HDALSGSGN      | CKI            |
| 394 | KRPSQRAKY      | PKC            |
| 395 | EDNEYTARE      | Hck            |
| 396 | ENAFSPSRS      | CDK            |
| 397 | HKSGYLSSE      | EGFR           |
| 398 | LAYESHESM      |                |
| 399 | PYKFPSSPLRIPGZ | na             |
| 400 | GHQGTVPSD      | GRK5           |
| 401 | ANDEYFIRK      |                |
| 402 | DEASTTVSK      | PKC            |
| 403 | FEARYQQPF      | EGFR           |
| 404 | GLLRSWNDP      |                |
| 405 | DTVTSPQRA      | CDK            |
| 406 | EKHHSIDAQ      |                |
| 407 | RRASTIEMP      | PKA,CaM-II     |
| 408 | SDEESNDDS      | CKII           |
| 409 | NVFSPGGT       | CDK            |
| 410 | RRASF          |                |
| 411 | AKGGTVKAA      | PKC            |
| 412 | DDEITQDEN      | GRK            |
| 413 | ETDDYAEII      | FAK            |
| 414 | YTTNSPSKI      | CDK            |
| 415 | SPLKSPYKI      | CDK            |
| 416 | RKRTRKE        | PKA,PKG        |
| 417 | RPPGFTPFR      |                |
| 418 | SASGTPNKE      | CDK            |
| 419 | NSVDTSSLS      |                |
| 420 | LRANSI         | PKA            |
| 421 | SSSSPSRR       | CDK            |
| 422 | TKSASFLKG      | CDPK           |
| 423 | VESLSSSEE      | CKI            |
| 424 | YRRNSVRFL      |                |
| 425 | SPALTGDEA      | CKII           |
| 426 | RKQITVR        | PK             |
| 427 | VHNRSKINL      | AMP-PK         |
| 428 | SPVHSIADE      | PKA            |
| 429 | LRRASLGAF      | PKA,H4-PK      |
| 430 | PRKGSPRKG      | sperm-specific |
| 431 | SSPGSPGTP      |                |
| 432 | TKAASEKKT      | PKC            |
| 433 | LRRSSSVGY      | PKA,PKC        |
| 434 | PSEKSEEIT      | PKC            |
| 435 | KAQEYFNIK      |                |
| 436 | KRQSSTSNA      | PKA            |
| 437 | QKRPSQRSKYL    | PKC            |
| 438 | QSPSSSPTH      |                |
| 439 | KGHEYJNIK      | PDGFR          |
| 440 | KRRSSSYHV      | PKA            |
| 441 | KAKQISVRGL     | PK             |
| 442 | HSIYSSDDD      | CKII           |
| 443 | LVMQTAAGT      |                |
| 444 | EEELYLEPL      |                |
| 445 | EQLSTSEEN      | CKII           |
| 446 | IDMESQERI      | DNA-PK         |
| 447 | MILLSELSR      |                |



|     |                |                |
|-----|----------------|----------------|
| 448 | PYKFPSSPLRIPGZ | na             |
| 449 | GPAASPAAA      |                |
| 450 | AQAASPAKG      | CDK            |
| 451 | DHSRSTKAA      |                |
| 452 | FPFHSPSRL      |                |
| 453 | GRILTLPRS      | PKC            |
| 454 | EDVGSDEED      | CKII           |
| 455 | ENTVSTSLG      | GRK            |
| 456 | RRQHSYDTF      | CaM-II         |
| 457 | SFMMTPYVV      | MKK4           |
| 458 | PGTESFVNA      | beta-ARK       |
| 459 | SDEEV          | PK             |
| 460 | APQTPGGRR      | MAPK           |
| 461 | DFPLSPPKK      | CDK            |
| 462 | FKAFSPKGS      | CDK            |
| 463 | RDSNYISKG      | PDGFR          |
| 464 | DDEESED        | CKII           |
| 465 | VKRISGL        | H4-PK-I        |
| 466 | RRKDYPALH      | PKA            |
| 467 | SEKSKGLG       |                |
| 468 | PPSAYGSVK      | Src            |
| 469 | RRFSV          |                |
| 470 | STRRSVRGS      | PKC            |
| 471 | TQSTSGRRR      | PKC            |
| 472 | VNELSKDIG      | CKI            |
| 473 | RAGETRFTD      | CaM-III        |
| 474 | SPSPSFRWP      | PKC            |
| 475 | RVSGSRR        | PKC            |
| 476 | VRLRSSVPG      |                |
| 477 | SRKLSDFGQ      | PKA            |
| 478 | LSGFSFKKN      | PKC            |
| 479 | PSRRSRRS       | RS             |
| 480 | STDYYREGP      |                |
| 481 | TPAISPSKR      |                |
| 482 | LVVASAGPT      |                |
| 483 | PVPEYINQS      | EGFR,Src       |
| 484 | KKAESPVKE      |                |
| 485 | KSLNYIDLD      | IR             |
| 486 | KRKQISVRGL     | PK             |
| 487 | SRGDYMTMQ      | IR             |
| 488 | KKKSGGEDD      | CKII           |
| 489 | KTSPSSSPA      |                |
| 490 | PRRRSSFGI      | PKA            |
| 491 | IGSVSEDNS      | CaM-II         |
| 492 | NAPVSALGE      | GSK3           |
| 493 | EETPYSYPT      | Abl,FAK,Src    |
| 494 | ERSPSPSFR      |                |
| 495 | IRKYTMRRL      |                |
| 496 | NEEESSYSY      |                |
| 497 | PYKFPSSPLRIPGZ | na             |
| 498 | GRRQSLIED      | PKA,PKC,Cam-II |
| 499 | ASATSSSGG      |                |
| 500 | DLPMSPTL       | JAK1,Src       |
| 501 | GDLQSAEFH      |                |
| 502 | GSEEYMNMD      | IR             |
| 503 | EENTYDEYE      | Src            |

|     |                |                |
|-----|----------------|----------------|
| 504 | ERRKSHEAE      | PKA            |
| 505 | RRRVTSATR      | PKA            |
| 506 | SKDSSKRGR      | PKC,CaM-II     |
| 507 | MSVEEV         | CKII           |
| 508 | AALESEDED      |                |
| 509 | ARKSTRRSI      | PKC            |
| 510 | DLFGSDDEE      | CKII           |
| 511 | FRRLSISTE      | AMP-PK,PKA     |
| 512 | RGAISSAEVY     | PKG            |
| 513 | RKISASEF       |                |
| 514 | LHRASLG        | PKA,H4-PK      |
| 515 | RRRPTPAML      | PKA            |
| 516 | SGYSSPGSP      |                |
| 517 | LGEGTP         |                |
| 518 | RRLSSLRA       | S6K            |
| 519 | TAESSQAEE      | CKII           |
| 520 | TRRASFSAQ      | PKA            |
| 521 | VSRTSAVPT      | PKA            |
| 522 | REQLSTSEE      | CKII           |
| 523 | LSYRGYSL       | PhK            |
| 524 | KASGSSP        | PKA            |
| 525 | VVGGSLRGA      | PKC            |
| 526 | SRRPSYRKI      | S6K            |
| 527 | PEGDYEEVL      |                |
| 528 | QEGDTDAGL      | CKII           |
| 529 | SVFSSPSAS      | CDK            |
| 530 | TRKISQTAQ      | PKA,PKG,CaM-II |
| 531 | PINGSRTP       | CDK            |
| 532 | KQISVRGL       | PK             |
| 533 | KLINSIADT      |                |
| 534 | LDDQYTSSS      |                |
| 535 | PYDNYVPSA      |                |
| 536 | SRQLSSGVS      | MAPKAPK2       |
| 537 | KNIVTPRTP      | MAPK           |
| 538 | LKLASPELE      | CDK,CKII       |
| 539 | QLIDSMANS      | Raf1           |
| 540 | IVYKSPVVS      |                |
| 541 | NGYISAAEL      | CKII           |
| 542 | EILNSPEKA      | AKT            |
| 543 | ESPESTEIT      |                |
| 544 | KRPSHRAKA      | PKC            |
| 545 | NNYVYIDPT      | Kit            |
| 546 | PYKFPSSPLRIPGZ | na             |
| 547 | GSPRTPRRG      | CDK            |
| 548 | DADEYLIPQ      | EGFR           |
| 549 | DRLVSARSV      | PKC            |
| 550 | GGLTSPGLS      | MAPK,CaM-II    |
| 551 | GTVPSDNID      | GRK2,GRK5      |
| 552 | EGSAYEEVP      | EGFR           |
| 553 | ESIISQETY      | CKI            |
| 554 | RVRKSKGKY      | PKC,PKG        |
| 555 | SNDSTSVSA      | GRK            |
| 556 | RRPTVA         | PKA            |
| 557 | AEPDYGALY      | EGFR           |
| 558 | AVASSPSKA      |                |
| 559 | DPGTSYRTR      | PDK            |

|     |                |                   |
|-----|----------------|-------------------|
| 560 | GEGTYGVVY      | WEE1,MYT1,Lyn     |
| 561 | RLRLSPSPT      | CDK               |
| 562 | RKASRKE        | PKA,PKG           |
| 563 | LRRWSLG        | PKA,H4-PK         |
| 564 | RRVTSATRR      | PKA,PKC           |
| 565 | SLQASIVTD      |                   |
| 566 | RRATPA         |                   |
| 567 | ADGIYAASG      | Fes               |
| 568 | TGDTYTAHA      | Abl               |
| 569 | TVSKTETSQ      | RK                |
| 570 | WTSDTQGDE      | CKI               |
| 571 | RKFSSARPE      | PKA               |
| 572 | KKKKASVA       |                   |
| 573 | LRRASLG        | PKA,H4-PK         |
| 574 | YKNDYYRKR      |                   |
| 575 | SSEITTKDL      | CKII              |
| 576 | PLSRTLVS       | AMP-PK,CKI,PKA,PK |
| 577 | LRRASLRG       | PKA,H4-PK         |
| 578 | TEGQYELQP      |                   |
| 579 | TSPSSPAS       |                   |
| 580 | PPSAYGSVK      | Src               |
| 581 | RTKRSGSV       | PKA               |
| 582 | KRFGSKAHM      | PKA               |
| 583 | LNDSEEEED      | CKII              |
| 584 | QRATSNVFA      |                   |
| 585 | SRSRTPSLP      | GSK3              |
| 586 | KRPSARAKA      | PKC               |
| 587 | LRAPSWIDT      |                   |
| 588 | QRRTSVSGE      | PKA               |
| 589 | HATPSPVVD      | GSK3              |
| 590 | KRPSQRAKA      | PKC               |
| 591 | EDAESEDEE      |                   |
| 592 | ENAEYLRVA      | EGFR              |
| 593 | HKRKSSQAL      | PKA               |
| 594 | LAYESHESL      |                   |
| 595 | PYKFPSSPLRIPGZ | na                |
| 596 | GGVDYKNIH      |                   |
| 597 | ALRPSTSRS      | PKA               |
| 598 | DEAATKTQT      | MHCK              |
| 599 | FARKSTRRS      | PKC               |
| 600 | GLGESRKDK      | PKC               |
| 601 | DTHRTPSRS      | CDK               |
| 602 | EKESSNDST      | GRK               |
| 603 | RRAISGDLT      | PKA               |
| 604 | SAYRSVDEV      | BCKDK             |
| 605 | NTVSTSLGH      | GRK               |
| 606 | RASLG          |                   |
| 607 | AKDASKRGR      | PKC               |
| 608 | DDEASTTVS      | PKC               |
| 609 | ETAESSQAE      | CKII              |
| 610 | YTRFSLARQ      | PKC               |
| 611 | SPKQSPSSS      |                   |
| 612 | RKRSRKE        | PKA,PKG           |
| 613 | RPPGFSPFR      |                   |
| 614 | SARVYENVG      | PDGFR             |
| 615 | NRSASEPSL      | AMP-PK,PKA        |

|     |                |                   |
|-----|----------------|-------------------|
| 616 | KGYSLG         |                   |
| 617 | SSSSSPKAE      |                   |
| 618 | TKKTSFVNF      | PKA               |
| 619 | VEPLTPSGE      | ERT,PK            |
| 620 | YRLPSNVDQ      | CRYS-K            |
| 621 | SPAISIHEI      | PhK               |
| 622 | RKQISVR        | PK                |
| 623 | VGWPTVRER      | PKC               |
| 624 | QTYRSFHDL      | PKG               |
| 625 | LRRASLGAA      | PKA,H4-PK         |
| 626 | PRKGSPKRG      | sperm-specific    |
| 627 | SSPASLSRA      |                   |
| 628 | TKAASEKKS      | PKC,CaM-II        |
| 629 | LRRPSDQEV      | PKA               |
| 630 | PSAPSPQPK      | CDK               |
| 631 | KAKVTGRWK      | PKC               |
| 632 | KRPTQRAKY      | PKC               |
| 633 | PLSRTL SVRSL   | AMP-PK,CKI,PKA,PK |
| 634 | QSPGSPLEE      | CKII              |
| 635 | KGGSYSQAA      |                   |
| 636 | KRRRSSKDT      | PKC               |
| 637 | KAAQISVRGL     | PK                |
| 638 | HRTPSRSFG      |                   |
| 639 | LSGFSFKKN      | PKC               |
| 640 | EEEEYMPME      | Src               |
| 641 | EQFSTVKGV      | GRK5              |
| 642 | IDKISRIGF      | PKC               |
| 643 | MHRQETVDA      | CaM-II            |
| 644 | PYKFPSSPLRIPGZ | na                |
| 645 | GNHTYQEIA      | Src               |
| 646 | APVASPAAP      | MAPK              |
| 647 | DGNNSEDES      | CKII              |
| 648 | FMTEYVTR       |                   |
| 649 | GRGLSLSRF      | PKA               |
| 650 | EDTLSDSDD      | CKII              |
| 651 | ENQASEEED      | CKII              |
| 652 | RRPTSPVSR      |                   |
| 653 | SFMDSSGLG      |                   |
| 654 | QKRPSQRSK      | PKA               |
| 655 | SDEEH          |                   |
| 656 | APLTPGGRR      | MAPK              |
| 657 | DEPSTPYHS      | GSK3              |
| 658 | FGSRSLYGL      |                   |
| 659 | RDPVTENAV      | GRK               |
| 660 | AVRRSDRA       | PKA               |
| 661 | VKRGSGL        | H4-PK-I           |
| 662 | RRKDTPALH      | PKA               |
| 663 | SEITTKDLK      | CKII              |
| 664 | PNVSYIASR      |                   |
| 665 | RRDSV          |                   |
| 666 | STRRSIRLP      | PKC               |
| 667 | TPQVSDTMR      | PKA               |
| 668 | VNATYVNVK      |                   |
| 669 | RAAHSIKGG      |                   |
| 670 | SPSLSRHSS      | GSK3, CKII        |
| 671 | RTPPPSG        | PKC               |

|     |                |            |
|-----|----------------|------------|
| 672 | VRKRTLRRRL     | PKC        |
| 673 | SRKGSFGH       | PKA,PKC    |
| 674 | LSGESDLEI      | CKII       |
| 675 | PSQRSKYLA      | PKA,PKC    |
| 676 | STDEYLDLS      | FGFR3      |
| 677 | TNHIYSNLA      | Kit        |
| 678 | LSRHSSPHQ      | GSK3, CKII |
| 679 | PTRHSRVAE      | PKA        |
| 680 | KISITSRKA      | ERA        |
| 681 | KSKISASRK      | PKC        |
| 682 | KRKQISVGGL     | PK         |
| 683 | SRALSRQLS      | MAPKAPK2   |
| 684 | KKKFSFKKP      | PKC        |
| 685 | KTRSSRAGL      | PKA,PKC    |
| 686 | PAPGSPEPP      |            |
| 687 | IGSESTEDQ      | CKII       |
| 688 | MRRNSFTPL      | PKA        |
| 689 | EEQEYVQTV      | EGFR       |
| 690 | ERRVSNAGG      | PKA,PKG    |
| 691 | IREESPPHS      |            |
| 692 | NDSVYANWM      |            |
| 693 | PYKFPSSPLRIPGZ | na         |
| 694 | GRRESLTSF      | PKA,PKG    |
| 695 | ARVFSVLRE      | CaM-II,PKC |
| 696 | DLPLSPSAF      | MAPK       |
| 697 | GDKKSKKAK      | PKC        |
| 698 | GSDVSFNEE      | CKII       |
| 699 | EEKGSPLNA      |            |
| 700 | ERQKTQTKL      | MLCK       |
| 701 | RRRSSKDTS      | PKC        |
| 702 | SKAGSLGNI      | PKA        |
| 703 | MSGDEM         | CKII       |
| 704 | AAATTPAAE      |            |
| 705 | ARKKSSAQL      | PKA        |
| 706 | DKVTSPTKV      | CDK        |
| 707 | FRRFTPDSL      | PKA        |
| 708 | RFTDTRKDE      | CaM-III    |
| 709 | RKISASEA       |            |
| 710 | LARASLG        | PKA,H4-PK  |
| 711 | RRRLSSLRA      | S6K        |
| 712 | SGYISSLEY      | CKII       |
| 713 | LARNSI         | PKA        |
| 714 | TIAVG          |            |
| 715 | TADISEDEE      | CKII       |
| 716 | TRQTSVSGQ      | CaM-II     |
| 717 | VSEEYDLDR      |            |
| 718 | REQESSGEE      | CKII       |
| 719 | GTKRSGSV       | PKA        |
| 720 | NRLQTMKEE      | PKC        |
| 721 | VVELSGESD      | CKII       |
| 722 | SRRPSRATW      | PKA        |
| 723 | PASQTPNKT      | CDK        |
| 724 | QDPVSPSLV      | GRK        |
| 725 | STTVSKTET      | PKC        |
| 726 | TRKISASEF      | PKA        |
| 727 | PGPQSPGSP      |            |

|     |                |                   |
|-----|----------------|-------------------|
| 728 | KQSGRGL        | PK                |
| 729 | KKSWRWTL       | PKA               |
| 730 | LASSKEEN       |                   |
| 731 | PLRRTLSVA      | AMP-PK,CKI,PKA,PK |
| 732 | SRPSSNRSY      |                   |
| 733 | KNDYYRKRK      |                   |
| 734 | LIEDAEYTA      | Lck,Fyn,Fes,Yes   |
| 735 | QKAQTERKS      | PKC               |
| 736 | ISTESQPNG      |                   |
| 737 | NGNNYVYID      | Kit               |
| 738 | EIKKSWRW       | PKA               |
| 739 | ESPASDEAE      | CKII              |
| 740 | KRKSSQALV      | PKA               |
| 741 | NNMPSSDDG      | GRK               |
| 742 | PYKFPSSPLRIPGZ | na                |
| 743 | GSPGTPGSR      | p34cdc2-p58cyclin |
| 744 | AVVRTPPKS      | GSK3              |
| 745 | DRKLSTKEA      | PKA               |
| 746 | GGIRSLNVA      |                   |
| 747 | GTRLRLARM      | PKA,PKC           |
| 748 | EGNKSPAPK      | CDK               |
| 749 | ESHESMESY      |                   |
| 750 | RVRISADAM      | PKA               |
| 751 | SNDDSDDDD      | CKII              |
| 752 | RRPTPA         | PKA               |
| 753 | AEGSSNVFS      | MLCK              |
| 754 | AVADSESED      | CKII              |
| 755 | DNPDYQQDF      | EGFR              |
| 756 | GDVKYADIE      | PDGFR             |
| 757 | RLQDYEEKT      | EGFR              |
| 758 | FKKSFKL        | PKC               |
| 759 | LRRPSLG        | PKA,H4-PK         |
| 760 | RRVRSQEPG      |                   |
| 761 | SLDDSGSAM      | GRK               |
| 762 | RRASVA         | PKC               |
| 763 | ADDEYAPKQ      | Src               |
| 764 | TESQYQQQP      |                   |
| 765 | TVKSSKGGP      | PKC               |
| 766 | WTSDSAGEE      | CKI               |
| 767 | RKAASVIAK      | PKC               |
| 768 | LRRASLDG       | PKA,H4-PK         |
| 769 | LRRASGG        | PKA,H4-PK         |
| 770 | YHTTSHPGT      | CK,CKII           |
| 771 | SSEESITRI      | CKI               |
| 772 | PLAGSPVIA      | CDK               |
| 773 | LGSPLRRR       |                   |
| 774 | TEDQYSLVE      | Src,IR            |
| 775 | TRTYSLGSA      | CaM-II            |
| 776 | PPSAYATVK      | Src               |
| 777 | RTKRSGSV       | PKA               |
| 778 | KREASLDNQ      | PKA               |
| 779 | LMDKYHVDN      |                   |
| 780 | QQGMTVYGL      |                   |
| 781 | SRSRSRSRS      | RS                |
| 782 | KRNSSPPPS      | PKA               |
| 783 | LQRYSSDPT      | JAK2,Cam-II,EGFR  |



|     |                |                   |
|-----|----------------|-------------------|
| 784 | QRRTSLTGS      | PKA               |
| 785 | GVRQSRASD      |                   |
| 786 | KRPSNRAKA      | PKC               |
| 787 | EAVTSPRFI      |                   |
| 788 | EMTGYVATR      |                   |
| 789 | HKIKSGAEA      | PKC               |
| 790 | LARRSTTDA      | PKA               |
| 791 | PYKFPSSPLRIPGZ | na                |
| 792 | GGTGTPNKE      | CDK               |
| 793 | ALGISYGRK      | PKC               |
| 794 | DDSGSAMSG      | GRK               |
| 795 | EYVQTVKSS      | PKC               |
| 796 | GKTDYMGEA      | IR                |
| 797 | DSTYYKASK      | FAK               |
| 798 | EKEISDDEA      | CKII              |
| 799 | RRADSLQKN      | PKC               |
| 800 | SAYGSVKAY      | PKC               |
| 801 | NTSSSPQPK      | CDK               |
| 802 | GSRRR          | PKC               |
| 803 | AKAKTTKKR      | PKC               |
| 804 | DDAYSDET       | CKI               |
| 805 | ESVDYVPML      | PDGFR             |
| 806 | YSTDYREG       |                   |
| 807 | SPKKSPRKA      | sperm-specific    |
| 808 | RKRSRKA        | PKA,PKG           |
| 809 | RPPASPSQ       | CDK               |
| 810 | SARLSAKPA      | PKG               |
| 811 | NRQSSQARV      | PKA               |
| 812 | KEAKSD         | CKII              |
| 813 | SSSNTIRRP      | PKC               |
| 814 | TKKQSFQQT      | PKC               |
| 815 | VDSAYEVIK      | Fps/Fes           |
| 816 | YRKSSLKSR      |                   |
| 817 | SNVSSTGSI      | GSK3              |
| 818 | RARSRKE        | PKA,PKG           |
| 819 | VGPGYLGSG      |                   |
| 820 | QTVKSSKGG      | PKC               |
| 821 | LRMFSEKAP      | PKC               |
| 822 | PRHLSNVSS      | PKA               |
| 823 | SSNEYMDMK      | PI3-KINASE        |
| 824 | THYGSLPQK      | CaM-II            |
| 825 | LRRPSDQAV      | PKA               |
| 826 | PRRNSRASL      | PKA               |
| 827 | KAKTTKRP       |                   |
| 828 | KRPSGRAKA      | PKC               |
| 829 | PLSKTSLVSSL    | AMP-PK,CKI,PKA,PK |
| 830 | QSGMTEYVA      |                   |
| 831 | KGATSDEED      | CKII              |
| 832 | KRRNSEFEI      | PKA               |
| 833 | LTRRASFSAQ     | PKA               |
| 834 | HRQETVEAL      | CaM-II            |
| 835 | LRRFLATM       | PKA               |
| 836 | EEEAYGWMD      | Src               |
| 837 | EQESSGEED      | CKII              |
| 838 | IAADSEAEQ      | CKII              |
| 839 | MGEASGAQL      | beta-ARK          |

|     |                |                   |
|-----|----------------|-------------------|
| 840 | PYKFPSSPLRIPGZ | na                |
| 841 | GNGDYMPMS      | IR                |
| 842 | APRYPGGRR      | MAPK              |
| 843 | DGNKSPAPK      | CDK               |
| 844 | FMTEYVATR      |                   |
| 845 | GRASSHSSQ      | S6K               |
| 846 | EDSTYYKAS      | FAK               |
| 847 | ENPQYFRQG      |                   |
| 848 | RRPTPATVA      | PKA               |
| 849 | SFKLSGFSF      | PKC               |
| 850 | QEKESERLA      | beta-ARK          |
| 851 | RRVSV          |                   |
| 852 | APFTPGGRR      | MAPK              |
| 853 | DEKLSEILG      |                   |
| 854 | FGHNTIDAV      |                   |
| 855 | RDEEYGYEA      |                   |
| 856 | AVRRSDAA       | PKA               |
| 857 | TKRSGSV        | PKA               |
| 858 | RRKATQVGE      | PKA,PKG           |
| 859 | SEGDSSEGE      |                   |
| 860 | PLDRSSHAQ      |                   |
| 861 | RRASS          |                   |
| 862 | STPLSPTRI      | CDK               |
| 863 | TPPLSPSRR      | GSK3,ERT,MAPKK,PK |
| 864 | VKRISGLIY      | H4-PK-I           |
| 865 | RAAASRARQ      | PKC               |
| 866 | SPRTPGGRR      | MAPK              |
| 867 | RRRRSVA        |                   |
| 868 | VRFESIRLP      | PKA               |
| 869 | SRKESYSVY      | PKA,PKG           |
| 870 | LSELSRRRI      |                   |
| 871 | PSPSSRVTV      | PKC               |
| 872 | SSVPTPSPL      | CDK               |
| 873 | TNEEYLDLS      |                   |
| 874 | LSRFSWGAE      | PKC               |
| 875 | PTKRSPTKR      | sperm-specific    |
| 876 | KISASRLQ       | PKC               |
| 877 | KSFGSPNRI      | CDK               |
| 878 | KRKQISVAGL     | PK                |
| 879 | SQHSTPPKK      | p34cdc2           |
| 880 | KKIDSFASN      | PKC               |
| 881 | KTETSQVAP      | RK                |
| 882 | PAAPSPGSS      | MAPK              |
| 883 | IGRFSEPHA      |                   |
| 884 | MQLKSEIKQ      | PhK               |
| 885 | EEQEYIKTV      | EGFR              |
| 886 | ERRPSNVSQ      | PKA               |
| 887 | IPPHTPVRT      | CDK               |
| 888 | NDSTSVSAV      | GRK               |
| 889 | PYKFPSSPLRIPGZ | na                |
| 890 | GRPITPPRN      | CDK               |
| 891 | ARTKRSGSV      | PKA               |
| 892 | DLPGTEDFV      | GRK2,GRK5         |
| 893 | GALYSGSEG      |                   |
| 894 | GRVLTLP RS     | PKC               |
| 895 | EKESNDS        | GRK               |

|     |                |                   |
|-----|----------------|-------------------|
| 896 | ERNLSFEIK      | PKA,PKC           |
| 897 | RRRRSRRAS      | PKA,PKC           |
| 898 | SIYSSDDDE      | CKII              |
| 899 | HGYSLG         |                   |
| 900 | AAASFKAAR      | PKC               |
| 901 | ARKFSSARP      | PKA               |
| 902 | DKEYYSVHN      | Met               |
| 903 | FRKLSFTES      | PKA               |
| 904 | RFHKSSKDS      |                   |
| 905 | RAKRSGSV       | PKA               |
| 906 | KSESSQK        | S6K               |
| 907 | RRRLSDSNF      | CaM-I,PKA         |
| 908 | SGKTSPSSS      |                   |
| 909 | KSRRTI         | PKC               |
| 910 | TAILE          |                   |
| 911 | SYPLSPLSD      | MAPK              |
| 912 | TRQASQAGP      | CaM-II            |
| 913 | VRVYTHEVV      | CDK               |
| 914 | RENEYMPMA      | Src               |
| 915 | GRGLSLSR       | PKA               |
| 916 | YIYGSFK        | p60c-src          |
| 917 | VTRSSAVRL      |                   |
| 918 | SRRLSQETG      | PKA,PKG           |
| 919 | PASPSPQRQ      | CDK               |
| 920 | PWRITDNEL      |                   |
| 921 | STSVSAVAS      | GRK               |
| 922 | TRIPSAKKY      | PKC               |
| 923 | PGGSTPVSS      | CDK               |
| 924 | QGTLKIFK       | PKC               |
| 925 | KKRLSVERI      | PKC               |
| 926 | KYRKSSLKS      |                   |
| 927 | PLSRRLSVA      | AMP-PK,CKI,PKA,PK |
| 928 | SRLHSVRER      |                   |
| 929 | KNDKSKTWQ      | IR                |
| 930 | LGGGTFDIS      | DnaK              |
| 931 | QHLLKSVMLQ     | PKA               |
| 932 | ISQESSEEE      | CKII              |
| 933 | NGDASPAAA      |                   |
| 934 | EHVSSSEES      | CKI               |
| 935 | ESMESYEVS      |                   |
| 936 | KQLASFEIY      |                   |
| 937 | NMPSSDDGL      | GRK               |
| 938 | PYKFPSSPLRIPGZ | na                |
| 939 | GSLKSRKRA      |                   |
| 940 | AVRRSDRAY      | PKA               |
| 941 | DPTMSKKKK      | PKC               |
| 942 | GGGTSPVFP      | CDK               |
| 943 | GSTSTPAPS      | MFPK              |
| 944 | EGGRTVGAG      |                   |
| 945 | ESHESLESY      |                   |
| 946 | RVLESFRAA      | PKC               |
| 947 | SMANSFVGT      | Raf1              |
| 948 | RRPSPA         |                   |
| 949 | ADSFSLNDA      | CKI               |
| 950 | ATSASPPQK      | CDK               |
| 951 | DNLYYWDQD      | erbB2             |

|      |                |                  |
|------|----------------|------------------|
| 952  | GDSSYKNIH      | CSF-R,Fms        |
| 953  | RKRLSQDAY      |                  |
| 954  | ASGSFKL        | PKC              |
| 955  | LRRGSLG        | PKA,H4-PK        |
| 956  | RRSVSEAAL      | AMP-PK,CaM-II    |
| 957  | SLAMSPRQR      |                  |
| 958  | RRASLG         |                  |
| 959  | AAVDTSEI       | CKII             |
| 960  | TESQSLTLT      | PKA              |
| 961  | TTRVTPLRT      | CDK              |
| 962  | WTADSGEGD      |                  |
| 963  | RHRDTGILD      | PKA              |
| 964  | NRIYTHQVV      | CDK              |
| 965  | LRKASLG        | PKA,H4-PK        |
| 966  | YHGHSMSDP      | PDK              |
| 967  | SSEESIISQ      | CKI              |
| 968  | PKRGSGBKDG     | PKA,PKC          |
| 969  | LGSALRRR       |                  |
| 970  | TDESDNEI       |                  |
| 971  | TRSVSSSSY      | PKA,PKC          |
| 972  | PPRRSSIRN      |                  |
| 973  | RTKGSQSV       | PKA              |
| 974  | KRAASPRKS      | sperm-specific   |
| 975  | LMAPSEEDH      |                  |
| 976  | QNPVYHNQP      | EGFR             |
| 977  | SRSRSRSPG      | RS               |
| 978  | KRKVSSAEG      | PKA              |
| 979  | LQDDYEDMM      | Lyn,Syk          |
| 980  | QRRSSEGST      | PKA              |
| 981  | GVLRRASVA      |                  |
| 982  | KRPSLRAKA      | PKC              |
| 983  | EASTTVSKT      | PKC              |
| 984  | ELSNYIAMG      | IR               |
| 985  | HHHATPSPP      | GSK3             |
| 986  | KTETSQVAP      | RK               |
| 987  | PYKFPSSPLRIPGZ | na               |
| 988  | GGSVTKKRK      | PKC              |
| 989  | AKRISGKMA      |                  |
| 990  | DDPSYVNVQ      | Fyn,Lck,IR,PDGFR |
| 991  | EVEKSPVKS      |                  |
| 992  | GKSSSYSKQ      | PKC              |
| 993  | DSRSSLIRK      | PKC              |
| 994  | EKAKSPVPK      |                  |
| 995  | RQRKSRTTI      | PKC              |
| 996  | SAYATVKAY      | PKC              |
| 997  | NTDGSTDYG      | PKA              |
| 998  | KRTRLR         | PKC              |
| 999  | AGPTSARDG      |                  |
| 1000 | DAPDTPPELL     | CDK              |
| 1001 | ESSYSYEEI      |                  |
| 1002 | YSLGSALRP      | PKC              |
| 1003 | SPHQSEDEE      |                  |
| 1004 | RKRSRAE        | PKA,PKG          |
| 1005 | RNASTNDSP      | beta-ARK         |
| 1006 | SAELYSNAL      | PDGFR            |
| 1007 | NRQLSSGVV      | PKA,PKC          |

|      |                |                  |
|------|----------------|------------------|
| 1008 | VGPDS          | CK2,PKR          |
| 1009 | SSSESGAPE      | CKII             |
| 1010 | TKHIYSNLA      | Kit              |
| 1011 | VDEMYREAP      | EGFR             |
| 1012 | YRKGSLKSR      |                  |
| 1013 | SNQEYLDLS      | FGFR             |
| 1014 | RKISASE        | PKG,PKA          |
| 1015 | VGFMTEYVA      | MAPK1            |
| 1016 | QTASSPLSP      | CDK              |
| 1017 | LRKVSKQEE      | PKA,PKG          |
| 1018 | PQRATSNVF      | MLCK             |
| 1019 | SSNDSTSVS      | GRK              |
| 1020 | THVASVSDV      | AMP-PK           |
| 1021 | LRLSTKYR       | PKA,PKC          |
| 1022 | PRRDSTEGF      | PKA              |
| 1023 | KAEEYILKK      |                  |
| 1024 | KRPSFRAKA      | PKC              |
| 1025 | PTPSAPSPQPKG   | CDK              |
| 1026 | QRYSSDPTG      | JAK2,Cam-II,EGFR |
| 1027 | KEDTYTAHA      | Src              |
| 1028 | KRRLSFSET      |                  |
| 1029 | KRAKAKTTKRR    | PKC              |
| 1030 | HRQETVDAL      | CaM-II           |
| 1031 | LNRMSFASN      | AMP-PK,PKA       |
| 1032 | EEDTYTMPS      |                  |
| 1033 | EQEEYEDPD      | Lyn,Syk          |
| 1034 | HVSSSEESI      | CKI              |
| 1035 | METPSQRRR      | PKC              |
| 1036 | PYKFPSSPLRIPGZ | na               |
| 1037 | GNFNVEFT       | EGFR             |
| 1038 | APRTPGGRR      | MAPK             |
| 1039 | DGNGYISAA      | IR,EGFR          |
| 1040 | FLTEYVATR      |                  |
| 1041 | GRALSTRAQ      | PK,PKC           |
| 1042 | EDRMSLVNS      |                  |
| 1043 | ENPEYLGLD      | erbB2            |
| 1044 | RRLSSLRAS      | S6K              |
| 1045 | SFKKSFKLS      | PKC              |
| 1046 | PSKKYAIKG      |                  |
| 1047 | RRPSV          |                  |
| 1048 | APETPGGRR      | MAPK             |
| 1049 | DEEMSETAD      | CKI              |
| 1050 | FFSSSESGA      | CKII             |
| 1051 | RDDTYTAHA      | Abl              |
| 1052 | APTPGGRR       | MAPK             |
| 1053 | STNDSPL        | beta-ARK         |
| 1054 | RRKASGPPV      | PKA              |
| 1055 | SEENSKKTV      | CKI              |
| 1056 | PASPSQRQ       | CDK              |
| 1057 | RRASR          |                  |
| 1058 | STNEYMDMK      | PI3K,CHK         |
| 1059 | TPPLSPIDM      | ERT,PK           |
| 1060 | VKGATSDEE      | CKII             |
| 1061 | QRATSNVFA      | MLCK             |
| 1062 | SPRKSPRKS      | sperm-specific   |
| 1063 | RRRASVA        | PKA,PKC          |

|      |                |                |
|------|----------------|----------------|
| 1064 | VTPSPPLGP      | CDK            |
| 1065 | SRKDSLDDS      | GRK            |
| 1066 | LSEHSSPEE      | CKII           |
| 1067 | PSPKYPGPQ      |                |
| 1068 | SSVLYTAVQ      | PDGFR          |
| 1069 | TLSDSDDED      | CKII           |
| 1070 | LSLDSQGRN      | beta-ARK       |
| 1071 | PTKRSPQKG      | sperm-specific |
| 1072 | KIQASFRGH      | PKC            |
| 1073 | KRSNSVDTS      | PKA            |
| 1074 | KRKQISGRGL     | PK,PKA         |
| 1075 | SQESSEEEQ      | CKII           |
| 1076 | KKDVTVPKA      |                |
| 1077 | KSRWSGSQQ      | PKC            |
| 1078 | LYSGSEGDS      |                |
| 1079 | IGHHSTSDD      | BCKDK          |
| 1080 | MPGETPPLS      | GSK3           |
| 1081 | EEPVYEAEP      |                |
| 1082 | ERRNSILTE      | PKA,PKG        |
| 1083 | INETSQHHD      | p37            |
| 1084 | NDSNYVVKG      |                |
| 1085 | PYKFPSSPLRIPGZ | na             |
| 1086 | GRNASTNDS      | GRK2,GRK5      |
| 1087 | ARSGSSTYS      | PKA            |
| 1088 | DLLTSPDVG      | CDK,CKII       |
| 1089 | GAGNSLRTA      |                |
| 1090 | GRTWTLAGT      | PKA            |
| 1091 | EEHVYSFPN      | Abl,FAK,Src    |
| 1092 | ERHHSIDAQ      |                |
| 1093 | RRRRAASVA      |                |
| 1094 | SIRDTPAKN      |                |
| 1095 | GGYSLG         |                |
| 1096 | AAASFKAKK      | PKC            |
| 1097 | ARDIYKNDY      |                |
| 1098 | DKEVSDDEA      | CKII           |
| 1099 | FRKFTKSER      | PKG            |
| 1100 | RFFGSDRGA      | PKC            |
| 1101 | PRTPGGRR       | MAPK           |
| 1102 | KRRVSEV        |                |
| 1103 | RRRGSSIPQ      | PKA            |
| 1104 | SGDTSRHL       |                |
| 1105 | KQITVR         | PK             |
| 1106 | SSKRA          | PKC            |
| 1107 | SVSSSSYRR      | PKC            |
| 1108 | TRQASISGP      | CaM-II         |
| 1109 | VRTYTHEVV      | CDK            |
| 1110 | REILSRRPS      | GSK3           |
| 1111 | GASGSFKL       | PKC            |
| 1112 | VRRSDRA        | PKA            |
| 1113 | VTRRTLSDM      | PKA            |
| 1114 | SRRGESSE       | PKA,S6K        |
| 1115 | PASAYGSVK      | Src            |
| 1116 | PWQVSLRTR      |                |
| 1117 | STSRSLYSS      | PKA,PKC        |
| 1118 | TRGGSLERS      | PKC            |
| 1119 | PFKLSGLSF      | PKC            |



|      |                |                          |
|------|----------------|--------------------------|
| 1120 | QEQEYVQAV      | EGFR                     |
| 1121 | KKRFSFKKS      | PKC                      |
| 1122 | KYLASASTM      | CaM-II                   |
| 1123 | PRRVSRRRR      | PKC                      |
| 1124 | SRKRSGEAT      | PKA                      |
| 1125 | KMKDSDSEE      | CKII                     |
| 1126 | LFRLSEHSS      | CKII                     |
| 1127 | QDENTVSTS      | GRK                      |
| 1128 | ISITSRKAQ      | ERA                      |
| 1129 | NFLKTSAGS      | CCD,PK                   |
| 1130 | EHIPYTHMN      | IR                       |
| 1131 | ESMESYELN      |                          |
| 1132 | KKRFSFKKS      | PKC                      |
| 1133 | NKQGYKARQ      |                          |
| 1134 | PYKFPSSPLRIPGZ | na                       |
| 1135 | GSGTSSRPS      | PKC                      |
| 1136 | AVMVSHYIH      |                          |
| 1137 | DPPGTESFV      | beta-ARK                 |
| 1138 | GFKRSYEEH      |                          |
| 1139 | GSRRRRRRY      | PKC                      |
| 1140 | EFPLSPPKK      | CDK                      |
| 1141 | ESEKTKTKE      | MHCK                     |
| 1142 | RSSMSGLHL      | AMP-PK                   |
| 1143 | SLVNSRAQE      |                          |
| 1144 | RRATVA         |                          |
| 1145 | ADSFSLHDA      | CKI                      |
| 1146 | ATRRSYVSS      | PKA,PKC                  |
| 1147 | DNIDSQGRN      | GRK2,GRK5                |
| 1148 | GDSSEGEIE      |                          |
| 1149 | RKRKSSQAL      | PKA                      |
| 1150 | AKRSRKE        | PKA,PKG                  |
| 1151 | LRRATLG        | PKA,H4-PK                |
| 1152 | RRSSSVGYI      | PKA,PKC                  |
| 1153 | SKVTSKAGS      |                          |
| 1154 | RGYSLG         | PKA                      |
| 1155 | AARTPGGRR      | MAPK                     |
| 1156 | TEPQYQPGE      | Csk                      |
| 1157 | TTRRSASKT      | PKA                      |
| 1158 | WLTKTPEGN      | CDK                      |
| 1159 | RGRSSVYSA      | MHCK                     |
| 1160 | RKRTLRRRL      | PKC                      |
| 1161 | LRHASLG        | PKA,H4-PK                |
| 1162 | YNGYSSNS       | IR                       |
| 1163 | SRTPSLPTP      | PKA,PKC,PKN,CDK,GSK3,S6K |
| 1164 | PKKGSKKAV      | PKA                      |
| 1165 | LELSDDDD       | CKII                     |
| 1166 | TDDGYMPMS      | IR                       |
| 1167 | TRRLTGFLP      |                          |
| 1168 | PPEKTEEEE      |                          |
| 1169 | RTGRSGSV       | PKA                      |
| 1170 | KQSPSSSPT      | PKC?                     |
| 1171 | LLRPSRRVR      |                          |
| 1172 | QMALTPVVV      | CAK                      |
| 1173 | SRSRSPGRP      | RS                       |
| 1174 | KRKRSRKES      | PKA                      |
| 1175 | LQAISPKQS      | PKC                      |



A.

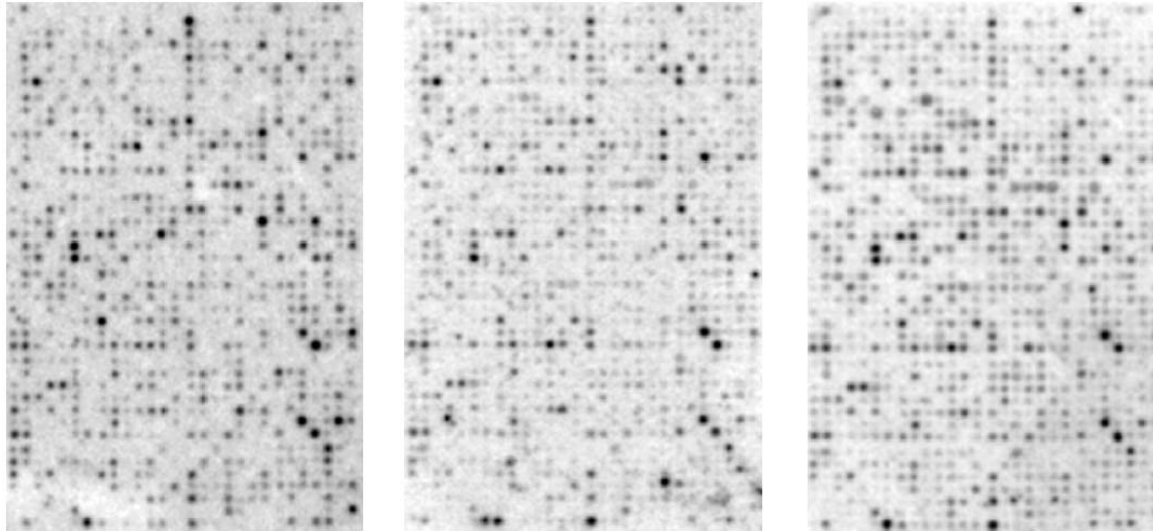

B.

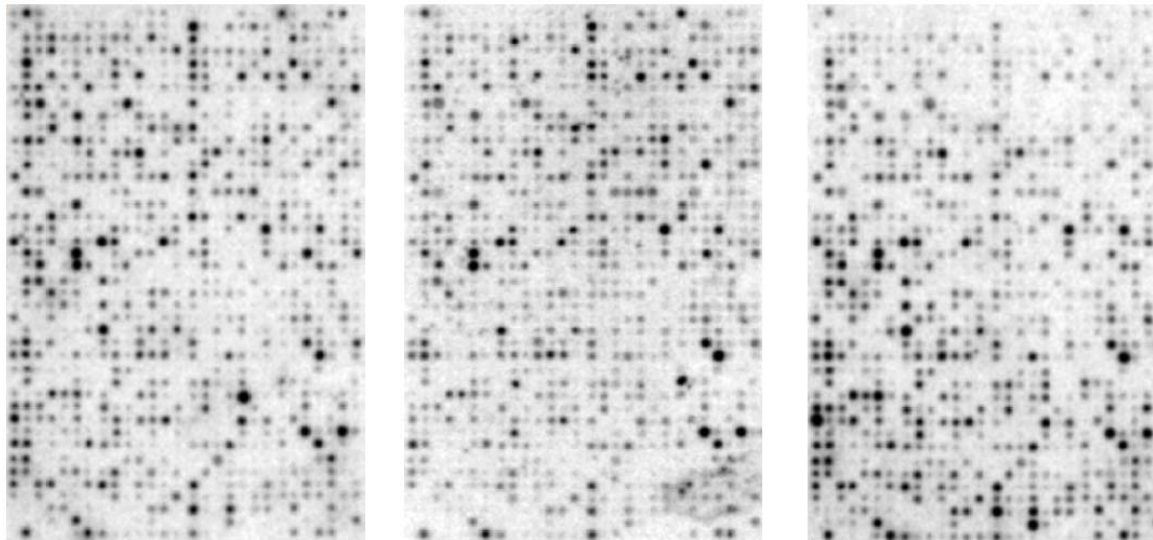

**PepChips for mature and immature NK cells.** The resulting images after phosphor imaging screens are exposed to the PepChips™ and then developed. These images were used to determine the phosphorylation signature for A) Immature NK cells and B) Mature NK cells.

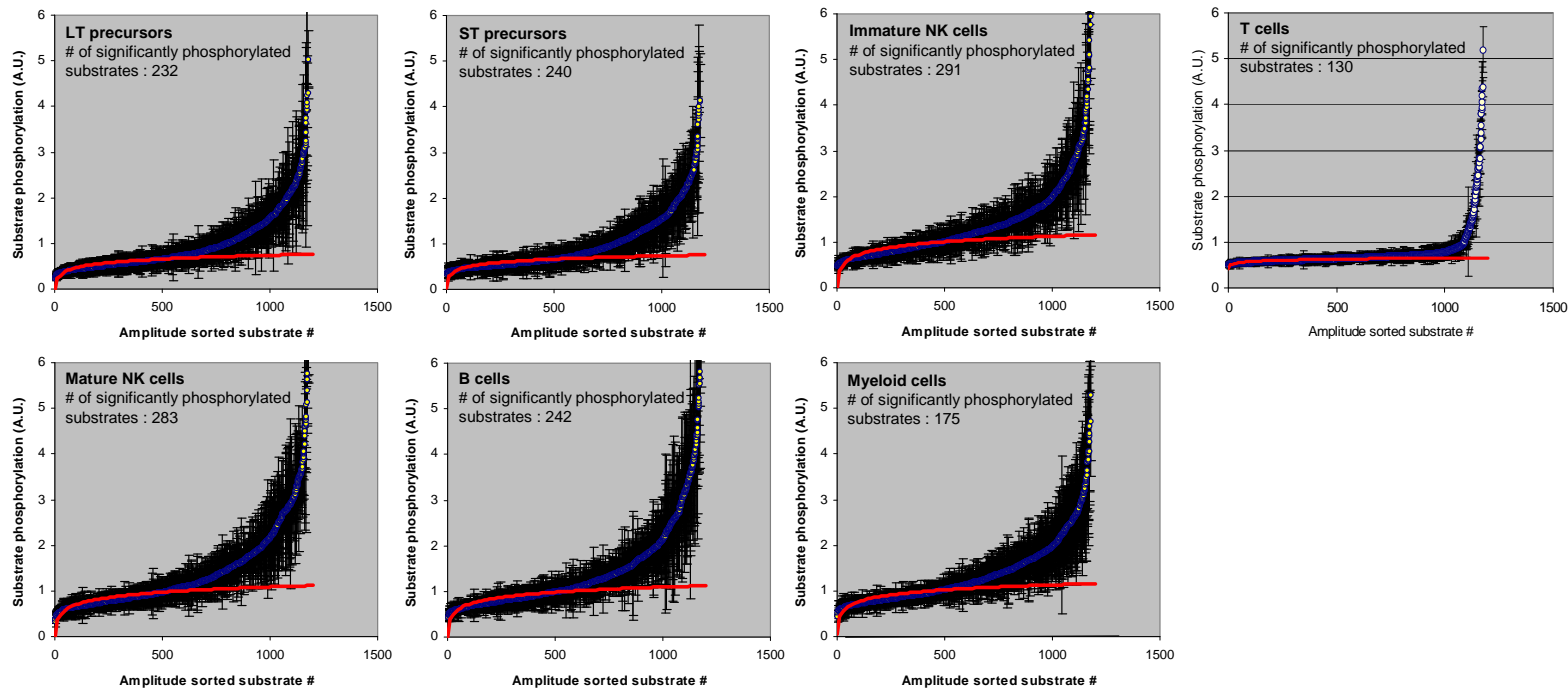

Supplement: NIHMS307692-supplement-1_si_001.pdf [file NIHMS307692-supplement-1_si_001.pdf]
