# Supplementary material
Source: PubMed Central journal article supplement (PMC3151341)
Supplement: NIHMS307692-supplement-2_si_002.pdf [file NIHMS307692-supplement-2_si_002.pdf]

## Supplemental Tables and Figures Legends

**Suppl. Table 1. Average densitometry values for all substrates on the arrays for LT-HSC and their Markov test of significance.**

**Suppl. Table 2. Average densitometry values for all substrates on the arrays for ST-HSC and their Markov test of significance.**

**Suppl. Table 3. Average densitometry values for all substrates on the arrays for iNK cells and their Markov test of significance.**

**Suppl. Table 4. Average densitometry values for all substrates on the arrays for B cells and their Markov test of significance.**

**Suppl. Table 5. Average densitometry values for all substrates on the arrays for myeloid cells and their Markov test of significance.**

**Suppl. Table 6. Average densitometry values for all substrates on the arrays for T cells and their Markov test of significance.**

**Suppl. Table 7. Average densitometry values for all substrates on the arrays for mature NK cells and their Markov test of significance**

**Suppl. Table 8. Peptides and their Phosphobase-derived annotation of upstream kinase.**

**Suppl. Fig. 1. Representative densitometric scans of PepChip arrays.** (A) iNK NK cells,  
(B) mNK cells.

**Suppl. Fig. 2. Representative Markov state analyses of PepChip array data for each cell type analyzed (as indicated).**
